# Supplementary material for: A genome-wide association study revealed the genetic variation and candidate genes for grain copper content in bread wheat (Triticum aestivum L.)
Source: Royal Society of Chemistry journal article supplement (doi:10.1039/d1fo04173h), 2022-01-01
Supplement: d1fo04173h1.xlsx [file d1fo04173h1.xlsx]

## Sheet: Table S1
Table S1 Primers used for RT-qPCR
Sequence Name	Primer Name	Primer Sequence (5'-3')
TraesCS5D01G282300	PF1	CTTTCCCCTCGGTGGTGTT
	PR1	CAGGTCCTTGCTTGGTTGC
TraesCS6B01G052900	PF2	TGGGACATCTACGACAAAGCC
	PR2	TCATCCAGCGCCACGAAT
TraesCS7D01G146600	PF3	CCGCTCAACCTTGCGATTT
	PR3	GCAGATGCTTCGTTAGCCACA
TaTUBULIN	PF4	TGAGGACTGGTGCTTACCGC
	PR4	GCACCATCAAACCTCAGGGA
