# Supplementary material for: A genome-wide association study revealed the genetic variation and candidate genes for grain copper content in bread wheat (Triticum aestivum L.)
Source: Royal Society of Chemistry journal article supplement (doi:10.1039/d1fo04173h), 2022-01-01
Supplement: d1fo04173h2.xlsx [file d1fo04173h2.xlsx]

## Sheet: Table S2
Table S2 Information and grain Cu content of the 443 wheat accessions
Number	Accession name	Sub-population	Status	Released year	Region	Environmental
						CU-YL-1	CU-YL-2	CU-YL-3	CU-YL-A	CU-NY-1	CU-NY-2	Cu-NY-3	CU-NY-A	CU-SQ-1	CU-SQ-2	CU-SQ-3	CU-SQ-A	CU-LY-1	CU-LY-2	CU-LY-3	CU-LY-A
1	Ruihuamai 520	3	Cultivar	2001-2010	CHN	4.30005	4.17228	4.87557	4.4493	5.2415	4.7055	4.70689	4.88463	4.30587	4.92019	4.65487	4.62698	4.95325	5.2595	4.97321	5.06199
2	Ruihuamai 518	3	Cultivar	2001-2010	CHN	4.35123	4.38333	4.23616	4.32357	4.258	4.107	4.32066	4.22855	4.7685	4.31306	4.63742	4.57299	5.03675	5.0385	4.79864	4.95796
3	Ruihuamai 549	3	Cultivar	2020	CHN	4.45328	4.466	4.36728	4.42885	3.95275	4.146	4.20938	4.10271	4.21756	4.10139	4.33735	4.21877	4.6485	4.803	4.55363	4.66838
4	Huaimai 4046	3	Cultivar	Post-2011	CHN	3.63537	3.54788	3.58279	3.58868	5.558	5.54025	4.55294	5.21706	4.52895	4.52988	4.66873	4.57586	3.937	3.59	4.02665	3.85122
5	Zhengmai 1860	3	Cultivar	2019	CHN	3.4812	3.2504	3.06695	3.26618	3.70575	3.65325	3.47808	3.61236	4.25513	4.45248	4.06621	4.25794	7.29025	3.245	4.67111	5.06879
6	Xinong 528	3	Cultivar	2010	CHN	4.48656	4.42799	4.55768	4.49074	4.1795	3.87725	4.30374	4.12016	5.09188	4.90763	4.82021	4.93991	5.4915	5.39975	5.065	5.31875
7	Luomai 906	3	Cultivar	2016	CHN	3.75569	3.74158	3.85273	3.78333	3.14175	2.70875	3.44167	3.09739	4.28026	4.14889	4.40467	4.27794	3.225	3.0705	3.24572	3.18041
8	Zhongmai 99	3	Cultivar	post2015	CHN	3.6057	3.68678	3.76863	3.68704	4.87	4.78925	4.27839	4.64588	4.32287	3.91222	4.66496	4.30002	4.88275	4.68375	4.61496	4.72715
9	Shannong 116	3	Cultivar	2017	CHN	4.52754	4.60022	4.78643	4.63806	3.287	3.3475	3.94361	3.52604	4.73947	4.50482	4.69441	4.64623	5.99625	6.114	5.35129	5.82051
10	Zhengmai 151*	3	Cultivar	NA	CHN	4.7005	5.09528	5.3658	5.05386	5.43725	4.71325	5.26626	5.13892	5.09794	4.93346	5.10923	5.04688	5.5165	6.51275	5.76517	5.93147
11	Huaimai 304	3	Cultivar	Post-2010	CHN	4.76575	4.90555	4.59163	4.75431	5.585	5.611	5.24527	5.48042	5.20955	5.72224	5.25043	5.39407	4.93075	5.001	5.05901	4.99692
12	Xinong 364*	3	Cultivar	2019	CHN	4.805	4.78524	4.33063	4.64029	4.77125	4.946	4.77825	4.83183	4.7784	4.1969	4.27555	4.41695	3.10225	5.45375	4.44475	4.33358
13	Zhongnongmai 4008	3	Cultivar	post2015	CHN	4.14034	4.35118	4.09438	4.1953	4.509	4.31025	4.43009	4.41645	4.42347	4.6196	4.07391	4.37233	3.488	4.8465	4.25486	4.19645
14	Huaimai 1196	3	Cultivar	Post-2010	CHN	5.66993	5.24087	5.17847	5.36309	5.3915	5.1415	5.31619	5.28306	5.73227	5.68342	5.47451	5.63006	5.54975	5.552	5.47265	5.5248
15	Yikemai 1506	3	NA	NA	Abroad	5.71143	5.43636	4.5978	5.24853	5.49075	5.92675	5.46355	5.62702	6.47207	6.27224	6.47477	6.40636	4.0255	4.9195	4.80285	4.58262
16	zhongmai 578	3	Cultivar	2019	CHN	4.14546	4.11629	4.05697	4.10624	3.979	4.18625	4.04764	4.07096	4.67211	4.90373	4.94962	4.84182	2.9905	5.10975	5.0493	4.38318
17	Xuyan 5	3	Cultivar	2017	CHN	3.83374	4.02937	4.32831	4.06381	4.7105	4.472	4.36994	4.51748	4.67076	4.78722	4.764	4.74066	5.14925	5.736	5.08506	5.32344
18	WanFeng 269	3	Cultivar	2016	CHN	5.00631	4.67565	4.66764	4.7832	4.352	4.2085	4.51383	4.35811	4.95289	5.40912	4.9193	5.09377	5.5965	5.589	5.23311	5.47287
19	Huaimai 20	3	Cultivar	2003	CHN	4.40298	5.68336	4.99299	5.02644	4.78825	4.55125	4.23581	4.5251	4.61123	4.03924	5.13541	4.59529	6.24375	6.19575	6.55844	6.33265
20	Jimai 60	3	Cultivar	2019	CHN	4.56582	4.6337	4.2922	4.49724	4.2375	3.80675	4.4356	4.15995	4.42572	4.6337	4.21724	4.42556	7.41925	5.042	5.63228	6.03118
21	Ji 954072	3	Cultivar	NA	CHN	3.84015	3.84921	3.07585	3.58841	4.418	4.55825	4.13361	4.36995	7.67749	8.79791	7.64192	8.03911	4.69004	4.6344	4.48601	4.60348
22	Jimai 45	3	Cultivar	NA	CHN	5.07755	5.21223	5.59976	5.29651	3.70025	3.6425	3.45624	3.59966	4.68223	5.0488	4.48249	4.73784	5.12275	5.6495	4.74283	5.17169
23	Jimai 17	3	Cultivar	1999	CHN	3.7954	4.05132	3.85285	3.89986	4.5925	4.43825	4.32191	4.45089	5.11671	4.8788	4.48732	4.82761	9.907	4.8715	5.3668	6.7151
24	Jimai 43	3	Cultivar	2012	CHN	4.00957	3.85884	4.14489	4.00443	4.95675	4.58375	4.4078	4.64943	5.0089	4.75962	5.04163	4.93672	5.53225	5.43825	5.1261	5.36553
25	Beijing 8	8	Cultivar	1999	CHN	5.14029	5.80837	5.34649	5.43172	5.00306	4.26729	5.40572	4.89202	5.56608	6.7303	5.08771	5.7947	5.42977	5.58538	5.47362	5.49626
26	Hanxuan 10	2	Cultivar	1966	CHN	5.85925	6.16733	6.65213	6.22624	5.59073	5.5184	5.87903	5.66272	6.79187	7.21942	6.17082	6.72737	6.20218	6.90774	6.32965	6.47986
27	Heng 136	5	Cultivar	2005	CHN	3.98913	3.89622	4.34065	4.07534	4.266	3.637	4.08111	3.9947	4.12845	5.02638	4.12815	4.42766	4.619	4.6965	4.46554	4.59368
28	Jinmai 47	5	Cultivar	1995	CHN	5.06992	4.8014	4.99076	4.95403	3.2385	3.95825	4.01995	3.7389	4.51879	4.85875	4.56243	4.64666	5.21025	4.906	4.71207	4.94277
29	Jinmai 54	1	Cultivar	1991	CHN	5.9557	6.02583	5.74971	5.91041	5.37175	4.898	5.69879	5.32285	6.42237	5.96091	5.54571	5.97633	5.31675	5.351	5.45551	5.37442
30	Liangxing 99	5	Cultivar	2001	CHN	5.76139	5.30655	5.26562	5.44452	6.722	6.70875	6.01428	6.48168	5.57664	5.92878	6.24355	5.91632	6.44525	6.4555	6.30501	6.40192
31	Heng 6632	5	Cultivar	2006	CHN	5.4423	4.96785	4.99403	5.13472	4.85075	4.846	4.9093	4.86868	5.28592	5.5084	5.10914	5.30115	5.1955	4.74525	4.95002	4.96359
32	Jimai 3	5	Cultivar	2003	CHN	4.27519	3.94322	3.93421	4.05087	4.38275	4.67075	4.16299	4.4055	4.03261	4.48154	4.71354	4.40923	5.43725	5.4995	5.03325	5.32333
33	Luohan 1	5	Cultivar	NA	CHN	5.47794	4.81552	4.93879	5.07742	5.13225	4.38125	4.97388	4.82913	4.40426	4.43981	4.81084	4.55163	5.647	5.889	5.50329	5.67976
34	Luohan 2	5	Cultivar	1998	CHN	4.88474	4.29285	5.06888	4.74882	4.483	7.40275	4.38792	5.42456	5.0884	5.0594	5.10938	5.08573	5.837	4.92675	5.05056	5.27144
35	Shijiazhuang 8	4	Cultivar	2001	CHN	4.71445	4.57982	4.55747	4.61725	6.4515	6.229	6.51566	6.39872	5.17019	5.06305	5.54315	5.25879	5.23025	5.4825	5.7428	5.48518
36	Luohan 9	5	Cultivar	2009	CHN	4.73013	4.59898	4.60374	4.64428	3.67975	3.96275	4.13937	3.92729	5.09995	4.9168	4.6399	4.88555	4.857	4.9795	4.65862	4.83171
37	Nanda 2419	1	Cultivar	1940	CHN	5.47513	5.30245	5.82745	5.53501	5.42375	5.41189	5.3631	5.39958	5.96856	6.41522	5.80481	6.06286	6.03396	5.90235	5.76647	5.90093
38	Yumai 48	5	Cultivar	1997	CHN	4.73372	4.84856	4.23442	4.60557	4.9295	4.69175	4.88903	4.83676	4.98565	4.75182	5.16747	4.96831	5.825	6.12775	5.91393	5.95556
39	Likang 11	5	Cultivar	2004	CHN	4.74975	5.37013	5.33078	5.15022	5.8205	5.165	5.59532	5.52694	6.2692	5.91036	5.9519	6.04382	6.4215	6.3095	6.10877	6.27992
40	Chang 6878	5	Cultivar	2002	CHN	6.2441	6.5662	6.83929	6.54987	5.297	4.8895	5.9316	5.3727	5.80799	5.65926	5.44883	5.63869	5.649	5.845	5.80853	5.76751
41	Changmai 6135	3	Cultivar	2010	CHN	4.11738	3.8561	4.15653	4.04333	4.56075	4.479	4.20842	4.41606	5.12599	5.75041	5.14741	5.34127	5.83725	5.97	5.83856	5.88194
42	Xinong 928	5	Cultivar	2005	CHN	5.42928	5.6711	5.77838	5.62625	5.42825	5.48675	5.54967	5.48822	5.21231	5.45344	5.70177	5.45584	6.40625	6.376	6.11064	6.29763
43	Yannong 836	5	Cultivar	2010	CHN	4.67834	4.85965	4.57131	4.7031	4.30575	4.2735	4.5827	4.38732	5.02028	5.4031	5.20468	5.20935	4.52025	4.77125	4.62473	4.63874
44	Yangguang 851	5	Cultivar	2012	CHN	4.68947	4.70321	4.11538	4.50269	4.79413	3.5188	4.74867	4.35387	4.63584	5.06821	4.21402	4.63935	4.48741	5.07564	4.77057	4.77787
45	Hanyun 618	5	Cultivar	2010	CHN	4.31828	3.71735	4.58825	4.20796	4.23425	3.7095	3.9758	3.97318	4.80503	4.9033	4.78759	4.83198	5.84825	5.63125	5.75177	5.74376
46	Zhengyin 1	6	Cultivar	1965	CHN	4.79127	5.74546	5.72063	5.41912	5.2005	4.827	5.47298	5.16683	6.24487	6.24336	5.87254	6.12026	6.54575	6.9315	6.31674	6.598
47	Hanyun 805	5	Cultivar	2011	CHN	5.13256	5.26033	5.4022	5.26503	5.2915	5.61725	5.27592	5.39489	5.86358	6.31809	5.57244	5.91804	5.2365	5.92575	5.47939	5.54721
48	Hanyun 20410	5	Cultivar	2007	CHN	5.20467	5.97951	5.01782	5.40066	5.30465	5.53836	5.64208	5.49503	5.67774	5.99945	5.278	5.65173	4.6179	6.95207	5.73735	5.7691
49	Aikang 58	1	Cultivar	2003	CHN	3.76488	3.90464	4.76937	4.14629	4.9695	4.7125	4.43707	4.70636	4.76053	4.50094	4.39026	4.55058	6.69775	6.512	6.88227	6.69734
50	Bainong 3217	1	Cultivar	1983	CHN	4.30604	4.26836	4.05957	4.21132	4.78875	4.8355	4.52855	4.7176	5.4628	5.15436	5.2186	5.27859	5.3575	6.3205	5.40218	5.69339
51	Fengchan 3	8	Cultivar	1966	CHN	7.07132	7.09222	7.29002	7.15119	4.64319	4.26652	5.86771	4.92581	6.11301	5.72432	5.65059	5.82931	6.57225	6.00275	6.14757	6.24086
52	Fengdecun 1	1	Cultivar	2011	CHN	3.80085	4.77919	4.26533	4.28179	4.9095	4.86275	4.84435	4.8722	4.7547	5.11518	4.91282	4.92757	5.121	5.3985	5.12128	5.21359
53	Huaimai 18	3	Cultivar	2000	CHN	4.63301	3.72392	4.04317	4.13337	5.03975	4.34375	4.38184	4.58845	5.17999	5.16567	4.87125	5.0723	5.09	5.896	5.12261	5.36954
54	Jiaomai 266	1	Cultivar	2012	CHN	5.4274	5.29431	5.67876	5.46682	3.0185	3.75875	3.15641	3.31122	4.82864	5.11184	4.46838	4.80295	4.81775	5.6415	4.53855	4.99927
55	Luomai 21	3	Cultivar	2006	CHN	4.54872	4.65875	4.8068	4.67142	5.0525	4.349	4.85562	4.75237	4.87759	4.9795	4.77961	4.8789	5.11225	3.95375	4.64054	4.56885
56	Luomai18	3	Cultivar	2012	CHN	3.85209	3.94156	3.15976	3.65114	4.2845	4.39375	4.11303	4.26376	3.9097	3.92299	4.36748	4.06672	4.799	4.669	4.52701	4.665
57	Pingan 8	3	Cultivar	2011	CHN	3.85149	3.24781	3.7544	3.6179	4.291	4.318	3.76941	4.12614	4.28757	4.56156	4.41552	4.42155	4.641	4.5325	4.3143	4.49593
58	Shannong 45	5	Cultivar	1999	CHN	4.61204	4.65407	4.27635	4.51415	5.13975	5.3165	4.89691	5.11772	5.83338	5.53258	5.51179	5.62592	5.3855	5.9395	5.4073	5.57743
59	Shannong 253	5	Cultivar	2001	CHN	5.23191	4.53721	4.37416	4.71443	5.23025	5.4075	4.88373	5.17383	5.24612	5.39501	5.83071	5.49061	3.8385	6.17025	5.96416	5.3243
60	Shimai 15	8	Cultivar	2005	CHN	4.37044	4.74451	4.68837	4.60111	4.481	4.1895	4.61275	4.42775	5.50947	6.61785	5.92907	6.0188	5.08825	5.352	5.01767	5.15264
61	Xiaoyan 22	6	Cultivar	2003	CHN	4.88019	4.93819	4.41435	4.74424	4.569	4.5635	4.75359	4.6287	5.3407	5.17445	5.28457	5.26657	5.9495	5.48875	5.39728	5.61184
62	Xinmai 26	1	Cultivar	2010	CHN	5.03003	5.05305	5.10987	5.06432	3.7735	3.7065	4.41328	3.96443	4.77401	4.84403	4.05692	4.55832	3.69025	4.34975	4.15109	4.0637
63	Xuke 718	1	Cultivar	2012	CHN	4.4267	4.5002	4.13112	4.35267	4.899	4.759	4.6996	4.78587	5.18333	4.9488	5.23903	5.12372	5.77475	5.87125	5.44853	5.69818
64	Yujiao 5	5	Cultivar	2011	CHN	4.95688	5.04693	5.00284	5.00221	5.32475	4.90675	5.18584	5.13911	4.73004	4.74207	4.88276	4.78496	5.0115	5.78475	5.32736	5.37454
65	Zhongyu 12	1	Cultivar	2008	CHN	3.99262	3.8405	3.90149	3.91154	4.8155	4.13525	4.328	4.42625	4.62099	4.59925	4.46741	4.56255	4.646	4.4865	4.48683	4.53978
66	Turkey 304	7	NA	NA	Abroad	6.74243	6.50236	6.85808	6.70096	5.021	4.9725	5.76168	5.25173	5.74994	6.29129	5.88506	5.97543	6.93275	6.751	6.48181	6.72185
67	HUBARA-5/ANGI-1	7	Cultivar	NA	Abroad	4.93426	5.02548	4.84108	4.9336	3.8675	4.11025	4.44649	4.14141	5.37202	5.43602	5.67092	5.49299	4.5305	4.98375	4.65358	4.72261
68	KAUZ´S´/FLORKWA-1//GOUMRIA-3	7	Cultivar	NA	Abroad	5.74387	5.59115	5.11761	5.48421	4.38893	4.41789	4.59004	4.46562	6.09245	6.95365	6.2558	6.43397	5.25707	6.30687	5.38466	5.64953
69	ZEMAMRA-5/ZEMAMRA-5	7	Cultivar	NA	Abroad	4.72439	4.47122	4.96953	4.72171	3.87542	3.90495	4.17332	3.98456	4.79942	5.27881	5.01996	5.03273	3.3555	3.742	3.75694	3.61815
70	TINAMOU-2//TEVEE-1/SHUHA-6	7	Cultivar	NA	Abroad	4.613	4.92012	4.52766	4.68693	3.682	3.85902	3.30106	3.61403	4.99221	5.65778	4.46439	5.03813	4.54194	5.08133	4.30811	4.6438
71	MUNIA//CHEN/ALTAR 84/3/CHEN/AEGILOPS SQUARROSA(TAUS)//BCN/4/MARCHOUCH-8	5	Cultivar	NA	Abroad	4.82192	5.45961	5.34244	5.20799	4.62875	4.3425	5.04418	4.67181	4.90329	4.57572	4.80535	4.76145	5.17025	5.3785	5.19764	5.2488
72	KARAWAN-1/TALLO 3//JADIDA-2	7	Cultivar	NA	Abroad	5.09018	5.34185	5.16751	5.19984	4.99075	6.61625	5.1663	5.5911	5.68436	5.35486	5.95029	5.66317	5.55025	5.809	5.50852	5.62259
73	Chinese spring	2	Landrace	1924	CHN	5.05382	5.03314	5.17182	5.08626	4.66733	4.3939	4.85023	4.63715	4.85338	5.02407	4.58384	4.82043	4.50425	4.35025	4.56824	4.47425
74	Hesheng 2	5	Cultivar	1987	CHN	4.77595	4.65392	4.78398	4.73795	5.72825	4.7065	5.19108	5.20861	5.45042	4.59936	5.30864	5.11948	5.769	5.99425	5.65144	5.8049
75	Baskerville	7	NA	NA	Abroad	5.39344	5.07406	5.66072	5.37607	4.06859	4.17569	4.57133	4.27187	5.26219	5.04236	4.65896	4.98784	4.539	4.8015	4.63728	4.65926
76	Bodycek	7	Cultivar	2010	Abroad	4.22299	4.07964	4.0615	4.12138	4.38024	4.12162	4.22994	4.24393	4.64932	5.09201	4.31322	4.68485	4.16872	4.34982	4.24949	4.25601
77	Dagmar	7	Cultivar	2012	Abroad	4.58348	4.20121	4.56628	4.45032	4.70546	4.77931	4.45334	4.64604	3.96465	5.75764	4.36341	4.69523	4.34626	5.06793	4.62251	4.6789
78	Matylda	7	Cultivar	2011	Abroad	4.44552	4.23002	4.99136	4.55563	4.06805	4.36228	4.14903	4.19312	4.83161	4.87253	4.46811	4.72408	4.21043	5.90513	4.75487	4.95681
79	Secese	7	Cultivar	2009	Abroad	3.23289	2.85694	5.48253	3.85745	3.15522	2.96495	3.00608	3.04208	4.24117	3.95349	3.5397	3.91145	3.41298	5.75096	5.05667	4.74021
80	Zhengmai 9045	5	Cultivar	2001	CHN	4.69004	4.73809	4.326	4.58471	4.63575	4.1475	4.68692	4.49006	5.70438	5.8412	5.18871	5.5781	5.71425	5.46425	5.28847	5.48899
81	Zaoyou 504	5	Cultivar	1993	CHN	5.49144	5.24074	5.40515	5.37911	4.87125	5.04525	5.056	4.99083	4.8058	5.23609	5.46985	5.17058	6.5585	5.84125	5.81858	6.07278
82	Jing 771	5	Cultivar	1981	CHN	4.728	5.14002	4.67958	4.8492	4.95307	5.14711	5.04654	5.04891	6.62815	6.06455	5.505	6.0659	4.73975	5.28444	5.02358	5.01592
83	OPATA	4	Cultivar	NA	Abroad	5.74076	5.44446	5.56878	5.58467	4.834	4.05425	5.13923	4.67583	4.89496	5.10204	4.68065	4.89255	5.09275	5.133	5.12166	5.1158
84	Suneca	7	Cultivar	1982	Abroad	5.23712	5.5019	4.85036	5.19646	4.825	4.72625	5.16345	4.9049	6.41677	6.14455	6.24942	6.27025	6.70525	6.3485	6.0724	6.37538
85	Banks	7	Cultivar	1979	Abroad	4.23752	4.19254	4.47835	4.3028	4.24048	4.03645	4.21651	4.16448	5.81557	5.94896	4.83465	5.53306	4.65194	5.90459	4.92435	5.16029
86	Gabo	7	Cultivar	1957	Abroad	4.84111	4.54458	4.44033	4.60867	5.04149	4.94305	4.79304	4.92586	5.95493	6.19963	5.46533	5.8733	5.49799	6.65113	5.64738	5.93217
87	Bodallin	7	Cultivar	1982	Abroad	5.73159	5.58984	5.15132	5.49092	3.19402	3.73819	3.39193	3.44138	5.76323	5.0171	4.95922	5.24651	5.37625	5.6685	5.81223	5.61899
88	Ciano	7	Cultivar	1969	Abroad	5.025	5.55588	5.35855	5.31315	4.7115	6.19825	5.13369	5.34781	5.76525	6.11509	5.712	5.86411	5.1725	4.7485	5.01823	4.97974
89	Hartog	7	Cultivar	1982	Abroad	5.19202	5.08966	5.04089	5.10752	3.49753	3.4231	3.29359	3.40474	5.99918	6.14108	5.59597	5.91208	4.36564	4.87094	4.57672	4.60443
90	Hyden	7	Cultivar	1982	Abroad	3.9911	3.69105	3.21601	3.63272	3.62235	3.74224	3.6567	3.67376	5.05136	6.60901	5.20763	5.62267	3.82928	4.14704	3.87767	3.95133
91	Magong	7	NA	NA	Abroad	4.47175	4.63126	4.33777	4.48026	3.48002	3.64503	4.05564	3.7269	5.73107	5.15951	5.45796	5.44951	3.99777	4.94939	4.33427	4.42714
92	Reeves	7	Cultivar	1989	Abroad	5.64081	5.52036	5.82718	5.66278	2.55235	4.79442	4.03636	3.79438	5.55253	6.00735	5.2335	5.59779	5.35356	5.40192	4.93061	5.2287
93	Sunelg	7	Cultivar	1984	Abroad	4.68079	5.01993	4.95003	4.88358	3.00043	3.08174	3.01018	3.03078	5.26287	5.98976	5.41522	5.55595	4.90104	5.2882	4.39981	4.86301
94	Banquet	7	Cultivar	2001	Abroad	6.35159	4.60511	4.96872	5.30847	4.38267	4.47347	4.49389	4.45001	5.48087	5.47391	5.28803	5.41427	5.90975	6.539	5.64755	6.0321
95	Kosutka	7	Cultivar	1987	Abroad	4.88887	5.02448	5.39961	5.10432	3.96519	4.36673	4.49484	4.27559	4.37472	4.58673	4.50068	4.48738	6.40875	6.651	6.85153	6.63709
96	Sulamit	7	NA	NA	Abroad	5.22019	4.98015	5.36951	5.18995	5.55209	5.4259	5.26612	5.4147	5.77061	5.39183	5.63392	5.59879	5.70525	5.85325	5.60821	5.72224
97	Viginta	7	Cultivar	1984	Abroad	4.56516	4.49015	4.18772	4.41434	5.00984	4.71141	4.75	4.82375	5.19457	5.91765	5.80595	5.63939	4.51186	5.32431	4.86206	4.89941
98	Siete Cerros 66	5	Cultivar	1969	Abroad	4.66546	4.59706	5.10017	4.78757	4.20648	4.23746	4.40177	4.2819	5.47146	5.71221	5.59231	5.59199	4.06801	3.9824	4.15073	4.06705
99	Lanli	4	Cultivar	2003	CHN	5.027	4.94839	5.67266	5.21602	3.90725	4.8265	4.42782	4.38719	4.28268	5.42793	4.57589	4.76217	4.6185	5.01275	4.68636	4.77254
100	Zimai	4	Cultivar	NA	CHN	5.59368	5.88665	5.44503	5.64179	4.5405	4.838	5.21358	4.86403	5.77129	5.38545	5.6161	5.59094	6.239	5.7395	5.73069	5.90306
101	Changwu 134	4	Cultivar	1984	CHN	6.43272	5.88034	5.89374	6.06893	5.66264	4.62566	5.77149	5.35326	5.56683	6.39749	5.40846	5.79093	6.03288	6.17656	5.99365	6.0677
102	Yanmai 8911	4	Cultivar	1997	CHN	4.44546	4.44759	4.13329	4.34211	5.16775	5.36	4.80767	5.11181	4.73141	5.18442	5.08789	5.00124	5.17225	4.99875	4.99289	5.05463
103	Xinong 979	4	Cultivar	2006	CHN	4.52612	5.03063	5.85918	5.13864	3.3605	3.48525	4.19556	3.68044	4.71967	4.96327	4.38881	4.69058	4.9615	5.8215	4.99285	5.25862
104	Xinong 1043	5	Cultivar	1999	CHN	4.30329	5.68852	4.5525	4.84811	4.1065	4.34175	4.89751	4.44859	5.22622	5.44173	5.57949	5.41581	7.1705	4.26125	5.44309	5.62495
105	Fothand	7	NA	NA	Abroad	5.58733	6.19782	5.42572	5.73696	6.05584	5.76599	6.12683	5.98288	6.52638	6.71965	6.00515	6.41706	5.7231	6.3536	6.06784	6.04818
106	Yuanzhuo 3	5	Cultivar	1994	CHN	4.5218	4.14353	4.81134	4.49223	5.10732	5.21374	4.62542	4.98216	4.83526	4.85069	4.5295	4.73848	3.5395	3.89425	4.01972	3.81782
107	Caoxuan 5	5	Cultivar	2007	CHN	6.03762	6.34836	4.5452	5.64373	3.8198	3.66538	3.78408	3.75642	4.95419	4.75741	5.12753	4.94638	9.763	9.861	9.80269	9.8089
108	Mulan	7	NA	NA	Abroad	4.01695	4.19061	4.14077	4.11611	4.93634	4.66803	4.56347	4.72261	5.2242	5.23232	5.13466	5.19706	5.51175	6.8815	5.65224	6.01516
109	Flanders	4	Cultivar	1940	Abroad	4.78666	4.92287	4.89257	4.86737	4.69842	4.4592	4.81065	4.65609	5.38632	6.2796	5.46051	5.70881	6.536	6.397	6.91455	6.61585
110	Centrum	7	NA	NA	Abroad	6.1565	5.9665	6.29044	6.13781	4.29947	4.23888	4.13299	4.22378	6.36225	5.23087	5.10279	5.56531	4.70725	5.3935	4.74458	4.94844
111	Xiaoshan 211	4	Cultivar	Post-2010	CHN	5.55509	4.98704	5.90919	5.48377	4.41425	3.95725	4.70064	4.35738	6.07862	6.90155	6.36537	6.44852	6.06025	6.44125	5.73405	6.07852
112	Xinong 889	4	Cultivar	2005	CHN	4.51634	4.60148	4.55019	4.556	3.77325	3.75125	4.18737	3.90396	5.87456	5.4756	5.5011	5.61709	6.8775	6.07715	6.71401	6.55622
113	Tabasco	7	NA	NA	Abroad	6.50986	6.24067	6.94826	6.56627	3.41708	3.38577	3.82888	3.54391	5.11283	5.21086	5.00428	5.10932	3.51425	3.749	3.69738	3.65354
114	Guixie 3	4	Cultivar	2010	CHN	4.79367	4.96386	4.80854	4.85536	4.35393	4.97456	4.6589	4.66246	5.65789	5.84913	5.01557	5.50753	4.41425	4.3565	4.47655	4.41577
115	Villosum	7	NA	NA	Abroad	7.0823	7.29314	7.57389	7.31644	4.87733	4.38456	4.08524	4.44904	6.20509	6.12194	6.45388	6.2603	5.772	5.7085	5.18858	5.55636
116	Baonong8865	4	Cultivar	1998	CHN	5.24402	5.0831	5.88485	5.40399	4.44537	5.18603	4.76424	4.79855	5.21159	6.02549	5.61095	5.61601	3.43524	4.96586	4.38844	4.26318
117	Xingzi 9104	4	Cultivar	NA	CHN	5.73113	5.05459	5.94495	5.57689	4.42125	4.81925	4.73792	4.65947	4.97806	5.14374	5.08802	5.06994	5.46675	5.0505	5.08506	5.20077
118	Jinghe 90	5	Cultivar	1990	CHN	5.64988	6.41027	5.80648	5.95555	4.636	4.75375	5.52314	4.97096	5.81277	5.50695	5.55076	5.62349	6.08575	5.33775	5.64888	5.69079
119	Heng 4399	5	Cultivar	2003	CHN	5.92057	4.76074	5.20507	5.29546	4.4295	4.49675	4.59512	4.50712	6.08334	5.00613	5.48445	5.52464	5.87325	6.08825	5.51887	5.82679
120	Hengguan 35	5	Cultivar	2004	CHN	4.20569	3.78237	4.07141	4.01983	4.22475	2.68	4.00356	3.6361	4.91662	4.8499	4.77171	4.84608	3.7185	4.84221	4.18809	4.2496
121	Han 5093	5	Cultivar	2005	CHN	6.34991	4.7279	4.69911	5.25897	5.47625	4.8945	5.10207	5.15761	5.5838	5.48087	5.1966	5.42042	5.1115	5.744	5.31919	5.39156
122	Han 6172	8	Cultivar	1995	CHN	4.56062	4.8376	4.51329	4.63717	5.07754	5.60725	4.95757	5.21412	5.5473	5.11099	5.62143	5.42657	5.70975	6.12075	5.59602	5.80884
123	Jimai 32	5	Cultivar	1989	CHN	4.40218	4.71207	4.45477	4.52301	4.87869	4.39602	4.79538	4.69003	6.62469	6.94542	6.38502	6.65171	5.13434	5.85492	5.26155	5.41694
124	Jimia 90	5	Cultivar	2009	CHN	5.65888	5.84053	5.27036	5.58992	4.63877	5.24113	5.23965	5.03985	10.0464	9.62178	9.02502	9.56438	5.78758	5.57531	5.53418	5.63236
125	Yaomai 16	5	Cultivar	2008	CHN	4.57955	3.6512	4.67219	4.30098	4.316	4.36425	3.9836	4.22128	4.85204	4.87489	4.56153	4.76282	4.46831	4.30444	4.25211	4.34162
126	Lin 8159	5	Cultivar	2012	CHN	5.809	3.85793	5.05994	4.90896	4.72	4.2945	4.28897	4.43449	5.65121	5.67437	5.03257	5.45272	5.152	5.11575	4.85224	5.04
127	Hanyun 719	5	Cultivar	2008	CHN	6.18082	4.99568	5.19645	5.45765	4.493	4.4285	4.74434	4.55528	8.41357	9.42274	8.29144	8.70925	6.03225	6.1205	6.03236	6.0617
128	Luohan 11	5	Cultivar	2007	CHN	4.8573	4.81722	4.77065	4.81505	6.022	4.91775	5.41961	5.45312	7.04491	5.74136	5.76364	6.1833	5.32825	5.322	5.35662	5.33562
129	Luohan 13	5	Cultivar	2007	CHN	5.63895	5.10234	5.14673	5.29601	4.564	4.5385	4.83317	4.64522	5.68352	5.4284	5.08976	5.40056	5.04725	5.05275	4.97772	5.02591
130	Changmai 251	5	Cultivar	2010	CHN	6.17145	6.13202	5.98674	6.09674	5.52025	4.83675	5.82614	5.39438	5.8861	5.76834	5.5982	5.75088	6.07175	5.3975	5.76513	5.74479
131	Xiaoheimai	1	Cultivar	1973	CHN	4.87827	5.26108	5.27106	5.1368	4.923	5.113	5.09204	5.04268	5.61897	5.84033	5.62082	5.69337	6.1305	6.1795	5.80068	6.03689
132	Sumai 188	1	Cultivar	2010	CHN	4.53715	4.58641	4.12434	4.41597	5.14975	4.737	4.86808	4.91828	4.31614	3.65714	4.03788	4.00372	6.0605	6.10475	6.27778	6.14768
133	Taikong 6	1	Cultivar	1999	CHN	5.60184	5.4852	5.45329	5.51345	5.36925	4.63125	5.42723	5.14258	5.36534	5.23542	4.84828	5.14968	4.54825	6.59125	5.52224	5.55391
134	Shenmai 22	3	Cultivar	Post-2010	CHN	4.15047	4.0819	4.21497	4.14911	3.95225	4.7875	4.01707	4.25227	4.81943	5.31699	5.18098	5.1058	5.936	5.0705	5.00786	5.33812
135	Xinfumai 1	1	Cultivar	2004	CHN	4.44377	4.11718	4.31714	4.29269	5.5115	5.48575	4.81434	5.27053	4.84111	4.3355	4.13154	4.43605	8.06775	6.6365	6.5062	7.07015
136	Anke 0817	1	Cultivar	2009	CHN	3.93992	4.6866	4.87042	4.49898	5.679	5.4455	5.1828	5.43577	5.98197	5.48691	5.81641	5.76176	6.02175	5.6135	5.60602	5.74709
137	Longping 203	1	Cultivar	2017	CHN	5.3087	5.26271	5.11899	5.23013	4.2105	4.02475	4.73661	4.32395	4.19885	6.68925	4.17228	5.02013	4.29325	4.26425	4.43137	4.32962
138	Yannong 19	3	Cultivar	1997	CHN	4.90354	5.32309	5.45247	5.22637	5.39225	4.88825	5.35767	5.21272	5.22724	5.31377	5.17983	5.24028	5.424	5.90875	5.56347	5.63207
139	Xinmai 8	1	Cultivar	2007	CHN	4.64688	4.45345	4.39671	4.49901	4.3065	4.23825	4.37997	4.30824	4.64832	5.17161	5.12044	4.98012	6.47475	6.85375	6.90282	6.74377
140	Huaimai 25	3	Cultivar	2007	CHN	5.17741	4.931	4.83565	4.98135	5.46125	4.87475	5.19613	5.17738	5.26746	5.60505	5.0234	5.29864	4.928	5.32625	5.15013	5.13479
141	Wanmai 68	3	Cultivar	2006	CHN	4.62574	4.46881	4.84098	4.64518	6.0185	5.553	5.24366	5.60505	5.52416	6.4691	5.14472	5.71266	4.357	4.2055	4.60205	4.38818
142	Shannong 20	3	Cultivar	2007	CHN	4.2818	4.10016	4.25057	4.21084	4.831	4.15425	4.46558	4.48361	5.49203	5.27584	4.99459	5.25415	5.3375	4.9715	4.92486	5.07795
143	Huaimai 22	3	Cultivar	2003	CHN	5.12067	4.86531	5.05421	5.01339	5.09	4.9625	4.97765	5.01005	5.83523	6.18145	5.72741	5.9147	6.3845	6.23275	6.86497	6.49407
144	Yannong 5158	3	Cultivar	2007	CHN	4.53438	4.38863	4.769	4.564	5.28975	4.99875	4.83919	5.04256	5.35137	4.6357	4.83871	4.94192	4.166	4.13475	4.37998	4.22691
145	Su 553	3	Cultivar	2008	CHN	4.42405	3.46584	4.74151	4.21047	4.64875	4.59525	4.0573	4.43377	4.80231	4.90661	4.69877	4.80256	4.69875	5.30275	4.68627	4.89592
146	Shiyou 20	8	Cultivar	2009	CHN	3.99816	3.31267	3.23559	3.51547	3.694	3.69075	3.50333	3.62936	5.04016	5.02432	4.63822	4.9009	5.18375	5.82725	5.83811	5.61637
147	Linmai 4	8	Cultivar	1961	CHN	4.68721	4.39584	4.37422	4.48576	5.01925	4.6705	4.70755	4.7991	4.6665	4.68447	4.86525	4.73874	5.25875	6.19075	5.38568	5.61173
148	Hemai 17	3	Cultivar	2008	CHN	4.96942	4.59854	4.96653	4.84483	5.01675	4.9085	4.80765	4.91097	5.19765	5.08235	5.13938	5.1398	5.312	4.85025	4.98997	5.05074
149	Liangxing 77	5	Cultivar	2008	CHN	5.41717	5.92815	5.53397	5.62643	5.62925	5.1385	5.7787	5.51548	5.39781	5.89689	5.69235	5.66235	4.74075	4.4975	5.00565	4.74797
150	Linmai 2	8	Cultivar	2002	CHN	6.08913	6.57242	6.54152	6.40103	2.9025	2.542	3.73746	3.06065	5.5593	4.55953	4.4396	4.85281	5.21751	5.12376	4.69291	5.01139
151	Shannong 15	3	Cultivar	2004	CHN	5.44805	5.35075	5.19098	5.32993	6.204	5.63	5.77738	5.87046	5.66695	5.89534	5.81465	5.79231	6.147	5.75325	5.89254	5.93093
152	Yannong 0428	3	Cultivar	2006	CHN	4.46363	4.19299	4.21031	4.28898	3.44475	3.353	3.81887	3.53887	4.20126	4.15921	4.21434	4.1916	3.58875	4.05025	3.81929	3.81943
153	Qingnong 2	3	Cultivar	2008	CHN	4.84394	5.33876	5.13236	5.10502	5.38625	4.881	5.36251	5.20992	5.75061	5.50343	5.43912	5.56439	5.68575	7.24325	6.09717	6.34206
154	Yannong 999	3	Cultivar	2011	CHN	3.53352	3.6091	3.44652	3.52972	5.1865	5.14175	4.3978	4.90868	4.17763	4.95085	4.96504	4.69784	5.57575	6.0095	5.32768	5.63764
155	Shannong 14	3	Cultivar	2004	CHN	4.20797	3.91024	4.3994	4.17254	3.73425	3.526	3.82224	3.69416	5.01953	5.00577	5.04209	5.02246	6.58075	6.09925	6.50075	6.39358
156	Heima 1	3	Cultivar	2000	CHN	4.19979	3.99018	4.49427	4.22808	5.212	4.91975	4.60109	4.91095	4.92881	4.56505	4.82694	4.7736	4.63225	4.79175	4.67503	4.69968
157	Luyuan 502	3	Cultivar	2008	CHN	6.96947	6.92507	6.59785	6.83079	6.16125	6.122	6.54316	6.27547	6.21074	4.55302	6.2745	5.67942	6.49075	5.9305	6.32147	6.24757
158	Tainong 18	3	Cultivar	2008	CHN	5.70692	4.75453	5.2695	5.24365	5.6835	5.53925	5.21901	5.48059	5.4236	5.25501	5.57478	5.4178	5.7615	6.05425	5.67825	5.83133
159	Luomai 4	3	Cultivar	2003	CHN	4.10974	4.20979	4.74864	4.35605	4.89125	4.9105	4.55052	4.78409	5.27784	5.4325	5.13753	5.28263	5.22425	5.2845	5.01976	5.17617
160	Zhoumai 16	1	Cultivar	2003	CHN	3.88089	3.39934	3.82424	3.70149	2.49525	2.66175	2.94729	2.70143	3.63343	4.28161	3.13814	3.68439	3.11925	3.48875	3.1851	3.26437
161	Zhongyu 10	3	Cultivar	2003	CHN	3.7834	3.96863	3.91656	3.88953	7.10125	6.2895	6.53494	6.6419	4.83163	4.0009	5.63379	4.82211	5.78025	5.649	5.98806	5.80577
162	Xiangmai 969	3	Cultivar	1996	CHN	3.81781	3.67749	3.55128	3.68219	4.96275	5.056	4.32012	4.77962	4.56794	4.69384	4.16631	4.47603	5.875	6.15525	5.45012	5.82679
163	Yumai 58	3	Cultivar	1999	CHN	4.03277	4.11454	4.2939	4.14707	2.303	2.24	3.20877	2.58392	4.39462	4.99481	4.65471	4.68138	4.3295	4.02075	3.85301	4.06775
164	Rumai 0319	3	Cultivar	2006	CHN	3.41524	3.1356	3.45964	3.33683	4.3155	4.32825	3.72555	4.1231	3.75839	3.8528	3.81913	3.81011	4.87075	4.73154	4.44261	4.68163
165	Pumai 9	3	Cultivar	2000	CHN	4.04636	4.42587	4.65164	4.37462	4.1585	3.731	4.29219	4.06056	4.07567	3.72397	4.14856	3.98273	4.639	4.705	4.5454	4.6298
166	Xumai 1	3	Cultivar	2007	CHN	4.6589	4.17996	4.46345	4.4341	3.93025	3.80725	4.0551	3.93087	4.51261	4.01347	4.6742	4.40009	5.70275	6.02525	5.26103	5.66301
167	Fanmai 8	3	Cultivar	2009	CHN	4.54281	5.62252	4.40546	4.85693	4.837	4.836	5.22976	4.96759	5.04791	5.06771	4.63839	4.918	4.03125	4.03475	4.43192	4.16597
168	Zhengmai 7699	3	Cultivar	2009	CHN	4.1836	3.95029	4.65451	4.2628	4.59225	4.56775	4.27127	4.47709	4.2599	4.40943	4.65522	4.44151	5.138	5.02325	4.81084	4.9907
169	Wenmai 6	3	Cultivar	1996	CHN	3.82366	4.0137	4.20511	4.01416	3.77425	4.01575	3.89398	3.89466	4.95959	4.30733	4.47736	4.58143	4.45673	4.23567	4.19546	4.29596
170	Pingan 6	3	Cultivar	2004	CHN	4.1667	3.70502	3.54965	3.80712	4.24825	3.574	3.97663	3.93296	4.97262	5.41467	4.56096	4.98275	5.13625	5.31275	5.30854	5.25251
171	Baofeng 7228	3	Cultivar	1980	CHN	4.43659	4.17182	4.16356	4.25732	3.20425	2.92	3.68804	3.27076	4.31818	4.62101	4.76789	4.56903	4.0655	4.01975	3.92443	4.00323
172	Guomai 0319	3	Cultivar	2005	CHN	3.75954	3.85754	3.07127	3.56279	2.74675	2.17775	3.30215	2.74222	4.68399	4.30149	4.64541	4.54363	4.0745	4.6725	4.01638	4.25446
173	Hemai 1	3	Cultivar	2007	CHN	4.2215	4.71156	4.06643	4.33316	5.2465	4.64125	4.97903	4.95559	4.20453	4.00622	4.47464	4.22846	4.57813	4.57622	4.71113	4.62182
174	Zhengnong 17	3	Cultivar	2001	CHN	4.17244	4.47956	4.26837	4.30679	4.971	4.8705	4.72528	4.85559	5.1037	4.90426	4.93232	4.98009	4.82275	4.63375	4.72726	4.72792
175	Emai 580	6	Cultivar	2012	CHN	4.62432	3.62083	4.01408	4.08641	5.08075	4.22875	4.35079	4.55343	4.8903	4.94041	4.7071	4.84594	5.00225	5.061	4.80468	4.95598
176	Xiangmai 25	3	Cultivar	2006	CHN	4.24423	4.34351	4.74765	4.44513	5.017	4.72925	4.68025	4.80883	5.10477	4.59404	4.38901	4.69594	3.333	3.39725	3.8035	3.51125
177	Chuanmai 104	6	Cultivar	2012	CHN	5.85293	5.226	4.43706	5.172	4.99275	4.92275	5.10937	5.00829	5.6715	5.49793	5.41742	5.52895	5.658	5.77675	5.51471	5.64982
178	Xikemai 2	6	Cultivar	2002	CHN	4.72852	5.14918	4.4734	4.7837	4.36825	4.6575	4.75871	4.59482	5.11097	5.12909	5.15766	5.13257	5.7045	5.48	5.3144	5.49963
179	Neimai 11	6	Cultivar	2005	CHN	4.44864	4.65414	4.83281	4.6452	3.24375	3.23725	3.94895	3.47665	4.36613	4.37967	4.14354	4.29645	4.82725	4.951	4.57573	4.78466
180	Neimai 836	6	Cultivar	2005	CHN	4.87142	4.79421	4.38662	4.68408	3.5565	3.68875	4.17536	3.80687	4.97602	4.5021	4.39151	4.62321	4.50975	4.81575	4.50029	4.6086
181	Chuanmai 107	6	Cultivar	1996	CHN	4.48236	4.39176	4.86855	4.58089	4.49325	5.82225	4.44251	4.91934	4.91793	5.4212	5.27156	5.20356	5.0745	5.344	4.95367	5.12406
182	Yunmai 56	5	Cultivar	1996	CHN	6.0594	5.56329	5.59209	5.73826	5.18375	5.2925	5.37352	5.28326	4.24551	4.86343	4.21192	4.44029	6.09775	6.097	5.85609	6.01695
183	Xinong 509	3	Cultivar	2008	CHN	6.26785	6.39341	6.62759	6.42962	5.541	5.652	5.96721	5.72007	5.18117	4.45497	5.55706	5.0644	5.838	5.83575	5.88032	5.85136
184	Zhongmai 895	3	Cultivar	2010	CHN	4.32788	3.78605	4.20524	4.10639	4.05725	4.01625	3.92165	3.99838	4.30299	4.28834	4.81175	4.46769	6.116	6.656	6.56455	6.44552
185	Shanmai 139	3	Cultivar	2009	CHN	4.75324	4.45162	4.51539	4.57342	5.6735	5.4205	5.06256	5.38552	5.63942	5.5821	5.74372	5.65508	6.17125	6.03	6.9546	6.38528
186	Xinong 9871	3	Cultivar	2006	CHN	6.7766	6.94175	6.19286	6.63707	5.99075	6.13675	6.46625	6.19792	5.22369	5.37944	5.84581	5.48298	6.177	6.32375	6.32233	6.27436
187	Changwu 521	5	Cultivar	2001	CHN	5.11534	4.67213	5.44877	5.07875	4.68325	4.23825	4.67769	4.53306	5.7221	6.01627	5.32712	5.6885	6.021	5.9665	5.95506	5.98085
188	Xikemai 6	6	Cultivar	2004	CHN	4.34294	4.60386	4.99591	4.64757	2.23275	2.276	3.4183	2.64235	4.81515	4.03527	3.94638	4.2656	4.748	5.69975	4.62202	5.02326
189	Yumai 13	6	Cultivar	2008	CHN	4.9022	5.28118	5.0019	5.06176	6.43425	6.03375	5.85772	6.10857	5.10394	5.39807	5.41598	5.306	5.11025	5.337	5.43499	5.29408
190	Zhongluo 08-2	1	Cultivar	2009	CHN	4.03662	4.16849	4.258	4.15437	4.6655	4.38325	4.41699	4.48858	3.98321	3.93293	4.54649	4.15421	5.273	6.5345	5.40816	5.73855
191	Guomai 301	1	Cultivar	2009	CHN	6.40897	7.73358	6.44562	6.86272	5.76735	6.75175	6.75046	6.42319	4.47393	4.38346	4.74173	4.53304	5.9995	4.845	5.86499	5.56983
192	Zhouyuan 9369	3	Cultivar	2007	CHN	4.79679	4.85169	5.04647	4.89831	6.21625	6.20275	5.53397	5.98432	6.41856	4.42459	5.66377	5.50231	4.37	4.66775	4.85724	4.63166
193	Qingfeng 1	8	Cultivar	1976	CHN	5.32401	4.94071	4.27542	4.84671	5.634	5.3195	5.28736	5.41362	5.42401	5.59478	5.31042	5.44307	5.18775	5.0685	5.1812	5.14582
194	Lumai 7	8	Cultivar	1981	CHN	4.99536	5.28732	4.46923	4.9173	5.031	5.3155	5.15916	5.16855	6.50418	4.82376	5.76673	5.69822	5.4805	5.65	5.42989	5.52013
195	Kexin 9	8	Cultivar	2006	CHN	5.13416	5.82762	5.67591	5.5459	6.99475	7.02675	6.41119	6.8109	5.93659	4.97895	6.53411	5.81655	6.639	7.605	6.88506	7.04302
196	Shimai 18	1	Cultivar	2008	CHN	4.69133	4.68542	4.65542	4.67739	5.12525	4.842	4.90533	4.95753	5.20989	5.69557	5.16013	5.3552	5.4285	5.51725	5.28369	5.40981
197	Beijing 0045	8	Cultivar	2004	CHN	4.71016	5.05954	4.99948	4.92306	4.9115	4.75225	4.98552	4.88309	5.13296	4.92638	5.09482	5.05139	5.39925	5.24225	5.20901	5.2835
198	Wanmai 33	6	Cultivar	1997	CHN	4.22841	4.49897	4.13693	4.28811	3.756	3.49025	4.12749	3.79125	4.74259	5.33923	4.67528	4.91903	5.793	6.33175	5.41741	5.84739
199	Jimai 24	1	Cultivar	1986	CHN	5.08054	4.86606	4.55713	4.83457	4.8735	4.12325	4.86978	4.62218	6.1071	5.59039	5.83834	5.84527	4.88525	4.34025	4.69843	4.64131
200	Liaomai 16	8	Cultivar	2000	CHN	5.27987	5.25137	5.23347	5.2549	5.77475	5.6035	5.51306	5.63044	5.2841	5.36622	5.7832	5.47784	6.462	6.5675	6.18085	6.40345
201	Changfeng 4	8	Cultivar	NA	CHN	5.90228	5.77631	5.85174	5.84344	6.98475	6.59325	6.38053	6.65284	5.83312	5.44252	6.03387	5.76984	5.67525	6.1395	6.06509	5.95995
202	Shanmai 159	1	Cultivar	2008	CHN	5.62214	5.40864	5.32175	5.45084	4.56025	3.58975	4.98445	4.37815	5.61309	5.53915	5.22861	5.46028	5.583	5.56875	5.37873	5.51016
203	Yumai 2	1	Cultivar	1984	CHN	5.25475	4.84985	5.98177	5.36212	4.69275	4.867	4.7713	4.77702	5.24423	5.17423	5.04758	5.15535	5.0315	5.417	5.07327	5.17392
204	Xinmai 9	1	Cultivar	2003	CHN	4.86794	4.75181	4.55016	4.7233	5.20625	5.16175	4.97903	5.11568	5.10026	5.06764	5.17517	5.11436	5.2635	5.568	5.27018	5.36723
205	Zhongjiao 2	6	Cultivar	2006	CHN	4.56281	3.78083	4.01794	4.12053	6.2535	6.28175	6.01717	6.18414	4.06244	4.86137	4.51765	4.48048	5.30875	6.004	5.77664	5.69646
206	Baimaizi	2	Landrace	Pre-1950	CHN	6.91325	6.86596	6.20198	6.6604	4.51899	4.87628	4.69247	4.69591	6.54829	6.45817	6.83252	6.61299	6.073	5.9015	5.55566	5.84339
207	Zijiehong	8	Landrace	NA	CHN	5.26452	4.88988	5.74017	5.29819	4.49505	4.71944	4.69247	4.63565	5.19901	5.64889	4.6754	5.17443	4.10775	4.603	4.46774	4.39283
208	Xian 83	6	Cultivar	NA	CHN	4.01763	4.36809	4.08528	4.157	4.843	4.8035	4.60554	4.75068	4.40516	4.40469	4.9098	4.57322	5.52075	6.211	5.44576	5.72584
209	Taixue 12	1	Cultivar	2011	CHN	4.46061	4.44597	5.23073	4.71244	4.3875	4.45675	4.41673	4.42033	5.30906	5.75656	5.2376	5.43441	5.947	4.8025	5.05541	5.2683
210	Taixshan 21	8	Cultivar	2000	CHN	8.01185	8.01976	8.1898	8.07381	7.08275	7.08975	7.55126	7.24125	6.24324	5.76679	6.64058	6.21687	6.58875	6.7275	6.95584	6.75736
211	Zhengmai 9023	1	Cultivar	2001	CHN	4.62705	4.68198	4.33307	4.54736	6.2045	5.52325	5.44324	5.72366	3.96987	4.68569	4.55346	4.403	4.16725	4.558	4.72283	4.48269
212	Xiannong 151	6	Cultivar	1982	CHN	5.07901	5.09156	5.29387	5.15481	5.19	5.20025	5.14078	5.17701	4.49589	4.52546	5.12638	4.71591	5.683	5.77275	5.53218	5.66264
213	Sumai 6	6	Cultivar	1993	CHN	4.26227	3.91209	4.54352	4.2393	3.6035	4.86725	3.7578	4.07618	4.957	5.30906	4.8615	5.04252	4.76025	6.21175	4.90993	5.29398
214	Yumai 13	8	Cultivar	1996	CHN	4.89943	5.10625	4.96467	4.99012	5.202	4.8485	5.15412	5.06821	6.11685	5.83919	5.91216	5.95607	6.77112	6.71675	6.214	6.56729
215	Mianmai 37	6	Cultivar	2004	CHN	4.06664	3.95734	4.24713	4.09037	3.1765	2.35675	3.56692	3.03339	4.49355	4.1999	4.19119	4.29488	5.72325	5.9625	5.08422	5.58999
216	Zhongmai 9	8	Cultivar	1991	CHN	4.09168	4.3188	4.24576	4.21875	4.98775	4.64575	4.65327	4.76226	4.85986	4.65945	5.0977	4.87233	5.7875	5.4875	5.30942	5.52814
217	Jining 13	1	Cultivar	2000	CHN	3.96261	4.46396	4.35248	4.25968	3.87675	4.129	4.17036	4.0587	4.52068	4.11575	4.40828	4.34824	4.57514	4.61575	4.45375	4.54821
218	Laizhou 953	8	Cultivar	1987	CHN	4.45933	4.89249	4.98769	4.77984	4.5945	4.05675	4.7435	4.46492	4.97064	5.04601	4.55746	4.85804	4.645	4.75625	4.71492	4.70539
219	Zhongmai 175	8	Cultivar	2007	CHN	4.88049	4.8355	4.83087	4.84896	4.95875	5.0025	4.89713	4.95279	5.06094	5.53478	5.22373	5.27315	5.60775	5.4145	5.30646	5.4429
220	Xinong 88	1	Cultivar	2005	CHN	5.55766	5.83127	5.55891	5.64928	4.645	4.67175	5.23814	4.85163	5.29544	4.84424	4.86815	5.00261	4.63725	6.21225	5.36255	5.40402
221	Lunxuan 978	8	Cultivar	2003	CHN	4.40537	4.79033	4.50447	4.56672	5.30725	5.4465	5.04879	5.26751	5.76984	5.80535	5.94911	5.84143	6.631	6.2665	5.9821	6.2932
222	Mianyang 26	6	Cultivar	1990	CHN	4.99279	4.83655	4.33428	4.72121	3.27125	3.04425	4.0539	3.45647	4.79762	5.2562	5.17496	5.07626	4.683	4.1125	4.28313	4.35954
223	Dromedaris	8	Cultivar	1952	Abroad	4.58947	4.54309	4.83329	4.65528	3.9775	3.50925	3.2603	3.58235	5.17867	4.95622	4.19364	4.77617	3.893	4.00025	3.71785	3.87037
224	Wanmai 19	6	Cultivar	1988	CHN	4.11192	4.02041	4.36369	4.16534	4.094	4.3425	4.0572	4.16457	4.85946	4.93242	4.95949	4.91712	5.6765	5.06175	4.93182	5.22336
225	Shannong 12	1	Cultivar	2003	CHN	4.77185	4.80102	4.5591	4.71066	4.765	5.18025	4.78301	4.90942	4.82221	5.08092	5.07207	4.99173	5.21375	5.345	5.11392	5.22422
226	Mexifen	8	Cultivar	1973	Abroad	3.08623	4.8965	4.10378	4.02883	4.9955	4.78425	4.946	4.90858	5.60719	5.61048	5.32081	5.51283	5.571	5.209	5.242	5.34067
227	Fan 6	6	Cultivar	1969	CHN	5.83214	5.45389	5.08266	5.45623	4.349	4.27525	4.90144	4.50856	5.28614	5.28251	5.08963	5.21943	5.7075	5.0955	5.23481	5.34594
228	Heibao	8	Cultivar	1999	CHN	5.05385	5.079	5.09498	5.07595	4.08625	4.50025	4.58262	4.38971	5.87351	5.08722	5.31317	5.42463	5.56575	5.47625	5.20821	5.41674
229	Xuzhou 24	8	Cultivar	1993	CHN	6.15996	5.32306	5.74906	5.74403	4.50125	4.69325	4.91215	4.70222	4.7633	6.82929	4.6036	5.39873	4.35425	4.61075	4.62572	4.53024
230	Jinan 13	8	Cultivar	1977	CHN	4.31314	4.27127	4.22336	4.26926	4.92863	4.44817	4.59995	4.65892	9.72388	9.37916	9.41738	9.50681	5.08009	5.29207	4.9907	5.12096
231	Ningmai 15	6	Cultivar	2005	CHN	5.49117	5.81459	5.96939	5.75838	4.34675	3.753	4.08067	4.06014	5.58955	6.02866	5.96893	5.86238	5.56425	5.983	5.20931	5.58552
232	Hongmangyouzimai	2	Landrace	Pre-1950	CHN	5.6167	4.91242	5.15465	5.22792	4.08631	4.14302	4.49936	4.2429	5.42342	6.19336	5.1588	5.59186	5.90995	5.62651	5.34527	5.62724
233	Hongmai	2	Landrace	Pre-1950	CHN	5.3314	5.26889	5.26456	5.28828	6.228	6.08325	5.74844	6.0199	5.86661	5.91985	5.91937	5.90194	5.80825	5.4305	5.6624	5.63372
234	Knteh	6	NA	NA	Abroad	6.25257	5.98266	5.95667	6.06397	5.001	5.072	5.49183	5.18828	5.86144	5.05321	5.93898	5.61788	6.8835	6.79325	6.38953	6.68876
235	Yangmai 158	6	Cultivar	1993	CHN	6.32995	5.65914	5.76481	5.91797	5.3655	4.5985	5.51232	5.15877	4.92059	4.35371	4.54828	4.60753	4.12575	6.68325	5.44044	5.41648
236	Jimai 1	8	Cultivar	1969	CHN	5.0466	5.05737	5.075	5.05966	4.1383	3.58202	4.59784	4.10605	8.24319	7.85914	7.78441	7.96225	5.52803	4.73785	4.95457	5.07348
237	Zhemai 1	2	Cultivar	1970	CHN	5.49143	5.40612	4.94648	5.28134	4.61475	4.4445	5.01043	4.68989	5.17664	5.58141	5.11396	5.29067	5.72075	5.69125	5.47414	5.62871
238	Jingshuang 16	8	Cultivar	1981	CHN	4.72977	4.93327	4.80812	4.82372	4.97575	4.88575	4.95451	4.93867	5.36635	5.11895	5.03062	5.17197	4.83975	5.42725	5.07384	5.11361
239	Ningmai 3	6	Cultivar	1973	CHN	5.12714	4.81165	5.01144	4.98341	4.883	5.15425	4.84732	4.96152	5.45768	5.22477	5.54406	5.40884	6.02025	5.65125	5.50627	5.72592
240	Kanghuixianhong	8	Cultivar	1979	CHN	4.93891	5.13481	5.30879	5.1275	4.795	4.378	4.9649	4.71263	5.79357	5.8497	5.18727	5.61018	5.39025	5.33575	5.2303	5.31877
241	Ningchun 13	1	Cultivar	1990	CHN	5.11146	4.89125	4.65288	4.8852	3.95825	3.89925	4.42475	4.09408	6.17501	6.07354	6.16725	6.1386	5.4275	5.48825	5.1135	5.34308
242	Wannian 2	1	Cultivar	Pre1960	CHN	5.17973	4.15556	4.56255	4.63261	5.15225	4.5875	4.6539	4.79788	6.34344	5.92937	6.39931	6.22404	5.267	5.07125	4.99738	5.11188
243	Kehong 1	8	Cultivar	1990	CHN	7.32682	7.29075	7.24919	7.28892	3.83434	3.8	3.56254	3.73229	6.11344	6.19449	6.43862	6.24885	6.40242	6.95391	6.63962	6.66532
244	Zhongyou 9507	8	Cultivar	2001	CHN	5.37994	5.52408	5.87602	5.59335	5.4025	5.552	5.46329	5.4726	6.78139	6.57169	6.26688	6.53999	6.46725	6.51675	6.1491	6.3777
245	Shijiazhuang 54	8	Cultivar	1964	CHN	5.54465	5.4812	5.64714	5.55766	4.575	4.34375	5.0281	4.64895	5.35581	5.52938	5.53844	5.47454	5.11575	5.0105	5.05145	5.05923
246	Gaboto	1	Cultivar	1957	Abroad	5.44525	;;;;ll	5.15772	5.34612	5.37171	5.31011	5.40355	5.36179	5.61128	6.36443	5.66255	5.87942	6.06625	6.24425	5.90468	6.07173
247	Ourou	1	Landrace	1950	CHN	6.21654	5.92488	6.30899	6.15014	4.73936	4.74182	5.33212	4.93777	5.11351	5.17155	4.97551	5.08686	5.07121	5.4957	5.29968	5.28886
248	Fengkang 8	8	Cultivar	1980	CHN	5.56603	5.51001	5.07487	5.38364	4.8455	4.6035	4.87775	4.77558	5.88438	5.82921	5.25863	5.6574	5.288	5.5505	5.23875	5.35908
249	AC vista	8	Cultivar	1996	Abroad	4.99878	4.87018	5.20371	5.02422	4.90616	4.8882	4.88817	4.89418	5.01017	5.0192	4.67842	4.9026	4.13689	4.96339	4.66281	4.5877
250	Abo	1	Cultivar	1969	Abroad	4.964	4.97506	3.83476	4.59127	4.84625	4.62875	4.91065	4.79522	4.95924	5.37771	4.56883	4.96859	4.1185	4.0725	4.36722	4.18607
251	Jinzhou 66	1	Cultivar	1976	CHN	4.75062	3.71408	4.53844	4.33438	4.55268	4.30074	4.13338	4.32893	8.32335	8.28494	8.6303	8.41286	4.26682	5.10378	4.50132	4.62397
252	Tuotuo mai	2	Landrace	Pre-1950	CHN	6.64787	5.86021	6.36236	6.29015	4.98234	4.83227	5.42128	5.07863	6.34966	6.37757	6.33663	6.35462	4.82796	6.01209	5.42044	5.42017
253	Jimai 6	8	Cultivar	NA	CHN	5.10117	5.80837	5.36086	5.42346	4.77146	4.60613	5.28991	4.88917	6.48577	7.24378	6.62974	6.78643	5.79733	5.27168	5.45298	5.50733
254	Yannong 15	3	Cultivar	1995	CHN	5.35036	5.07027	5.11331	5.17798	4.42579	4.54207	4.74803	4.57196	6.2236	6.26498	6.56072	6.34977	5.9165	5.5565	5.40701	5.62667
255	Jinmai 2148	6	Cultivar	1984	CHN	5.17401	4.78993	4.64792	4.87062	5.89131	5.78911	5.34062	5.67368	4.56733	4.15946	4.01305	4.24661	4.68272	4.33433	4.78589	4.60098
256	Xiaoziganzi	2	Landrace	Pre-1950	CHN	6.43159	5.55071	5.86034	5.94755	3.23951	3.64099	3.39511	3.4252	5.51009	5.64804	5.61001	5.58938	4.67894	5.97341	4.68248	5.11161
257	Beijing 10	8	Cultivar	1965	CHN	5.08544	4.91351	5.97433	5.32443	4.46017	4.10048	4.68684	4.41583	5.87748	4.74392	4.84131	5.15424	4.54597	5.69915	4.97732	5.07415
258	Jiyumai	2	Landrace	Pre-1950	CHN	5.39172	5.31323	5.0675	5.25748	4.71939	4.69407	5.01631	4.80992	6.236	6.56085	6.46519	6.42068	5.4655	5.63825	5.37335	5.49237
259	Jichun 1016	1	Cultivar	NA	CHN	5.60354	6.08397	5.84468	5.84406	4.64647	5.54092	5.36522	5.1842	6.1221	6.34716	6.46987	6.31304	4.74657	5.7281	5.27996	5.25154
260	Longchun 8	6	Cultivar	1975	CHN	5.2457	4.99227	4.43323	4.8904	4.3949	5.0217	4.69359	4.7034	5.00087	5.74186	4.98332	5.24202	4.9274	5.40541	5.0088	5.11387
261	Pingyang 181	8	Cultivar	1977	CHN	5.42265	5.4204	4.93704	5.26003	4.42178	4.75907	4.92109	4.70065	5.00288	5.38103	5.0982	5.1607	5.53265	5.54784	5.33386	5.47145
262	Baixiaomai	6	Landrace	NA	CHN	4.48357	4.56417	4.5451	4.53095	4.83807	5.1072	4.70112	4.88213	4.79128	4.94635	4.96778	4.9018	5.00484	5.52341	5.07646	5.20157
263	Xinchun 2	8	Cultivar	1984	CHN	6.80106	4.91962	4.97046	5.56371	3.85648	4.22409	4.38805	4.15621	4.90329	4.95978	4.34412	4.73573	3.905	6.16157	4.81821	4.96159
264	Sanyuehuang	2	Landrace	Pre-1950	CHN	4.92382	4.82732	4.58099	4.77738	5.36251	4.90911	5.09492	5.12218	7.56614	6.76579	6.99746	7.1098	5.51713	5.8744	5.49548	5.629
265	Huxumai	2	Landrace	Pre-1950	CHN	5.71203	5.80874	5.60316	5.70798	5.487	5.03186	5.64787	5.38891	5.62761	5.3191	5.53504	5.49392	5.94566	6.06663	5.88672	5.96633
266	Napo 63	1	Cultivar	1963	Abroad	5.32894	5.35593	5.59261	5.42583	4.27836	4.50819	4.81715	4.53457	5.30821	5.32568	5.44869	5.36086	4.72966	5.22028	4.92236	4.95744
267	Jinan 9	8	Cultivar	1965	CHN	4.92698	4.44057	4.21329	4.52695	4.02469	4.69196	4.23263	4.31643	6.89802	7.19639	5.52799	6.5408	4.994	4.82825	4.68496	4.83574
268	Hongheshangtou	2	Landrace	Pre-1950	CHN	6.26173	5.88109	6.72838	6.2904	5.14701	5.7909	5.51405	5.48399	6.22786	6.41161	6.1008	6.24676	6.28365	5.81933	5.87234	5.99177
269	Krac 66	8	Cultivar	NA	Abroad	7.4	7.39922	7.55151	7.45024	4.49978	4.73163	4.9495	4.72697	7.02879	6.2475	6.01839	6.43156	6.29475	6.089	6.27775	6.2205
270	Hongxiuzi	2	Landrace	Pre-1950	CHN	6.3395	5.9698	5.76038	6.02323	4.40218	3.87928	4.18599	4.15582	6.1836	5.72404	5.11829	5.67531	5.292	5.862	5.11333	5.42244
271	Baipu	2	Landrace	Pre-1950	CHN	6.23822	5.86593	5.52387	5.87601	6.28213	6.43556	6.07403	6.26391	6.51405	6.84141	5.96779	6.44108	4.95375	4.3965	5.14143	4.83056
272	Amazon	7	Cultivar	1929	Abroad	6.20035	6.20707	6.6198	6.34241	4.98865	5.32035	5.29786	5.20228	5.02199	5.13066	5.51653	5.22306	6.20725	6.7955	6.1002	6.36765
273	FILIN	1	Cultivar	1997	Abroad	4.9175	5.49629	4.85477	5.08952	6.01765	5.33245	5.75697	5.70236	5.77252	6.56889	5.1655	5.83564	4.39153	5.35798	5.16883	4.97278
274	Ganador	8	NA	NA	Abroad	3.54152	4.77391	4.35005	4.22183	4.61744	4.70805	4.69568	4.67372	7.3698	7.35994	7.84553	7.52509	5.45875	5.647	5.26714	5.45763
275	Kangdingxiaomai	2	Landrace	Pre-1950	CHN	4.25716	4.3693	4.03686	4.22111	4.4839	4.17067	4.4266	4.36039	4.67478	3.82899	4.28798	4.26392	4.0185	4.8955	4.44687	4.45362
276	Yuqiumai	2	Landrace	Pre-1950	CHN	5.59531	5.0618	5.09169	5.2496	5.90146	5.54928	5.48163	5.64412	6.82269	6.85021	6.81407	6.82899	5.07025	5.96875	5.50688	5.51529
277	Hongkemang	2	Landrace	Pre-1950	CHN	3.87765	3.57912	3.30014	3.58564	3.97738	4.20162	3.77825	3.98575	5.42628	6.99116	4.65263	5.69003	4.33	4.479	4.19575	4.33492
278	Jieke G377	8	Cultivar	NA	Abroad	6.92762	6.4299	6.83904	6.73219	4.946	4.82281	4.68795	4.81892	6.16072	6.21764	5.90676	6.09504	6.73675	6.50525	5.97665	6.40622
279	Baihuamai	2	Landrace	Pre-1951	CHN	4.81958	4.92125	4.33491	4.69192	5.0306	5.14801	4.97593	5.05152	4.67683	4.3903	4.6557	4.57428	4.14225	4.28	4.46606	4.2961
280	Zipi	2	Landrace	Pre-1952	CHN	5.17767	5.11238	5.12382	5.13796	5.22401	5.30882	5.16819	5.23367	5.7717	7.92759	5.52801	6.4091	5.5035	5.86075	5.51081	5.62502
281	Ailiduo	1	Cultivar	1916	Abroad	4.85821	4.68054	5.16623	4.90166	4.05581	4.05528	4.36817	4.15976	6.0236	6.17349	6.15454	6.11721	5.38475	5.87825	5.21039	5.49113
282	Zhengzhou 8960	8	Cultivar	NA	CHN	4.07403	4.2912	4.04348	4.13623	5.36425	5.3765	4.82772	5.18949	4.29711	4.48846	4.35704	4.38087	6.3975	6.75	6.99174	6.71308
283	Fengchan 1	1	Cultivar	1965	CHN	4.30966	4.50126	4.08177	4.29757	4.95452	5.01447	4.72789	4.89896	4.99051	5.19883	4.97374	5.05436	4.91625	5.30819	4.98411	5.06952
284	Mianyang 31	6	Cultivar	1997	CHN	4.40318	4.26538	4.30176	4.32344	3.91475	3.944	4.09007	3.98294	5.56652	5.20495	5.19142	5.32096	6.06375	7.367	6.84027	6.75701
285	Pingyuan 50	2	Cultivar	NA	CHN	4.93815	4.93594	5.23612	5.03674	5.01925	5.075	4.9776	5.02395	5.21264	5.49156	5.38105	5.36175	5.8555	5.94975	5.59428	5.79984
286	Zaoyangmai	8	Cultivar	1937	Abroad	4.38582	4.41859	4.36609	4.39017	4.03125	4.10725	4.22492	4.12114	5.00188	4.95134	4.84296	4.93206	5.41975	5.468	5.03756	5.30844
287	Shuiyuan 86	2	Cultivar	1996	CHN	5.24589	5.22528	5.38413	5.2851	4.86377	5.07239	5.04452	4.99356	5.78076	6.32894	5.37828	5.82933	5.28169	5.55225	5.29282	5.37559
288	Freedom	8	Cultivar	1991	Abroad	4.58793	4.26352	4.69285	4.51476	5.36194	4.916	4.81273	5.03022	5.00512	5.23178	4.91998	5.05229	4.83881	4.94445	4.86533	4.88286
289	Attila	8	Cultivar	1990	Abroad	4.7525	4.48709	4.77946	4.67302	4.8355	4.4835	4.6613	4.6601	5.17258	4.39098	5.19611	4.91989	5.93225	4.58425	5.05927	5.19192
290	Shanqianmai	8	Landrace	1970	CHN	5.31124	5.24146	5.33806	5.29692	3.61575	3.81575	3.42861	3.62004	5.34953	5.50965	5.72101	5.52673	4.99775	5.19325	4.53987	4.91029
291	Machang 2	4	Landrace	1973	CHN	5.75368	5.95177	5.83804	5.84783	5.81375	5.65825	5.88276	5.78492	6.00091	5.51223	6.10505	5.87273	6.656	6.18675	6.24184	6.36153
292	Nongda 36	4	Cultivar	1957	CHN	5.97916	5.66605	5.45291	5.69937	5.04631	5.09712	5.35618	5.16654	6.49689	6.40751	5.41457	6.10632	4.64971	5.92927	5.31172	5.2969
293	Qingchun 5	3	Cultivar	1969	CHN	5.45089	5.2	5.09135	5.24741	3.99088	4.4861	4.59544	4.35747	5.10904	4.54646	4.82461	4.8267	4.87868	5.27932	4.91781	5.02527
294	Shannong 1	4	Cultivar	1960	CHN	4.29601	4.34749	4.88456	4.50935	5.13583	4.6382	4.74166	4.83856	5.52582	5.5852	5.25982	5.45695	5.61544	5.58456	5.31389	5.50463
295	Wanmai 50	4	Cultivar	2004	CHN	5.0028	3.27106	4.54728	4.27371	5.58225	4.97175	4.42666	4.99355	4.4779	4.61123	4.99222	4.69378	8.527	8.325	7.09289	7.98163
296	Yumai 19	4	Cultivar	1991	CHN	4.20107	3.57636	3.71642	3.83128	5.20175	5.30575	4.38906	4.96552	4.17653	4.13511	4.79701	4.36955	4.90875	5.107	4.8016	4.93912
297	Huimaoafu	4	Cultivar	1968	CHN	5.26057	4.97291	4.6292	4.95422	4.12025	3.925	4.54658	4.19728	4.70512	4.95826	4.82921	4.83086	5.8575	6.2415	5.54853	5.88251
298	TIMILIA	8	NA	NA	Abroad	7.57636	6.32017	6.76656	6.8877	4.23957	5.25506	5.27987	4.92483	6.40013	6.32256	5.85723	6.19331	5.9165	5.6105	5.60229	5.70976
299	ABYSSINIAN 43	7	Cultivar	NA	Abroad	7.32267	7.59047	7.96192	7.62502	4.57113	4.45768	4.0808	4.36987	6.43361	6.90294	6.31685	6.55113	5.05925	5.08275	4.74093	4.96098
300	Yumai 49	1	Cultivar	1996	CHN	4.49926	3.96958	4.57366	4.3475	3.946	3.70675	3.95779	3.87018	4.86073	4.87185	5.00766	4.91341	6.4555	7.9895	6.13426	6.85975
301	Luomai 23	8	Cultivar	2007	CHN	4.92628	4.68732	4.84473	4.81944	3.679	3.954	4.18316	3.93872	5.63143	4.71831	5.68289	5.34421	7.46325	8.79575	8.81405	8.35768
302	RED EGYPTIAN	8	Landrace	1900	Abroad	5.00808	4.63098	4.58058	4.73988	4.64042	4.42751	4.6357	4.56788	7.82223	7.99248	7.9355	7.91674	5.55675	6.261	5.48448	5.76741
303	HINDI	2	Landrace	1926	Abroad	4.96101	4.32078	4.97987	4.75389	4.08125	4.12525	4.20102	4.13584	5.45065	5.746	5.98747	5.72804	5.3865	5.47525	5.42092	5.42756
304	PENNY	7	Cultivar	1900	Abroad	5.48243	5.59706	5.82935	5.63628	4.53792	4.42987	5.06749	4.67842	6.25313	5.9934	6.15292	6.13315	4.77575	4.61975	4.821	4.73883
305	FIFE	7	NA	NA	Abroad	4.87864	4.15898	4.20689	4.41484	4.12086	3.86299	4.13992	4.04126	5.43972	4.94398	4.30457	4.89609	3.611	3.56	3.77031	3.6471
306	GHABAGHEB	8	Landrace	1949	Abroad	5.23912	5.46097	5.76078	5.48696	3.87125	3.69375	3.66611	3.7437	5.82206	6.18685	5.24402	5.75098	6.21625	6.201	6.36112	6.25946
307	AURORA	8	Cultivar	1929	Abroad	5.76914	5.78978	5.6715	5.74348	4.45627	4.122	4.12303	4.23376	6.55276	6.12668	5.64784	6.10909	6.26875	6.47125	6.62101	6.45367
308	Baihuomai	4	Landrace	Pre-1950	CHN	5.3055	5.36431	5.88961	5.51981	5.36519	5.80799	5.36475	5.51264	7.15221	7.12157	7.01882	7.09753	5.09625	4.97725	5.14608	5.07319
309	Jinan 4	4	Cultivar	1955	CHN	4.88188	4.82382	4.86315	4.85628	5.00503	5.07959	4.91443	4.99968	6.01776	5.75547	5.84945	5.87423	4.651	5.2025	4.92264	4.92538
310	Xunong 7	1	Cultivar	2010	CHN	5.14484	5.1174	4.93156	5.0646	3.61175	3.9505	4.36457	3.97561	4.44532	4.6747	5.25144	4.79049	7.3585	7.48598	7.40302	7.41583
311	Shi-4185	1	Cultivar	1995	CHN	3.9281	4.0438	4.51292	4.16161	4.17575	4.19257	4.10978	4.15937	4.81589	4.71708	4.88249	4.80515	5.639	6.3225	5.35709	5.77286
312	Shiluan 02-1	1	Cultivar	2004	CHN	4.22729	4.20265	3.98595	4.13863	3.537	3.9845	3.86982	3.79711	4.83859	4.96928	4.80303	4.8703	5.586	5.06154	5.83912	5.49555
313	Tianping 3	1	Cultivar	Post-2000	CHN	3.45886	3.8637	4.42599	3.91618	5.383	5.81025	5.62335	5.60553	5.02438	4.91215	5.53688	5.1578	5.776	6.3815	5.92695	6.02815
314	Shan 229	1	Cultivar	1993	CHN	4.27512	4.40101	4.20869	4.29494	5.36325	4.798	4.88213	5.01446	5.40786	6.38747	5.36654	5.72062	5.89375	5.64275	5.47288	5.66979
315	Zhongxin 78	1	Cultivar	2009	CHN	4.25996	3.92879	4.45201	4.21359	4.42625	4.55775	4.17752	4.38717	4.68057	5.24584	4.53161	4.81934	4.3565	4.6865	4.40684	4.48328
316	Taishan 23	8	Cultivar	2004	CHN	4.8617	4.51791	4.58231	4.65397	3.15825	2.88025	3.83808	3.29219	5.66684	5.32662	5.34728	5.44691	4.49475	4.52175	4.28486	4.43379
317	Zimai 12	1	Cultivar	2001	CHN	5.42088	4.67205	5.0772	5.05671	4.76325	4.43975	4.71765	4.64022	5.32244	5.20715	5.07898	5.20286	5.47475	8.0985	6.09697	6.55674
318	Yannong 22	8	Cultivar	2002	CHN	4.40421	4.50072	4.4615	4.45548	4.921	4.6905	4.71086	4.77412	6.54684	5.28115	5.86245	5.89681	6.35	6.4085	6.82312	6.52721
319	Neijiang 31	6	Cultivar	1980	CHN	4.88838	4.76651	4.55139	4.73543	5.62275	5.193	5.19463	5.33679	4.6398	5.18196	4.96677	4.92951	5.0675	5.346	5.20271	5.2054
320	Xingmai 1	1	Cultivar	2000	CHN	4.49273	4.37341	4.39286	4.41967	4.42625	4.19475	4.39983	4.34028	5.27814	5.99928	5.37038	5.54927	6.63825	6.80725	6.94844	6.79798
321	Nongda 211	8	Cultivar	2007	CHN	5.52683	5.4064	5.8226	5.58528	5.49275	4.88525	5.44957	5.27586	4.96345	5.33507	5.08832	5.12895	5.41625	5.21425	5.36002	5.33017
322	Shanyou 225	1	Cultivar	1992	CHN	4.91681	4.82489	5.11618	4.95262	4.37725	4.85675	4.60107	4.61169	5.72152	5.92809	5.41042	5.68668	5.653	5.62075	5.69161	5.65512
323	Jimai 19	3	Cultivar	2001	CHN	4.21778	3.93393	4.45809	4.20326	4.5465	3.99175	4.24021	4.25949	4.94017	5.18018	4.55697	4.89244	4.739	4.03375	4.33765	4.37013
324	Jinfeng 1	2	Cultivar	1989	CHN	5.87842	5.79966	5.98197	5.88668	6.56875	6.60775	6.1842	6.45357	5.26319	5.28933	5.84873	5.46708	5.67525	5.275	5.71148	5.55391
325	Lumai 21	3	Cultivar	1991	CHN	5.23075	4.79392	4.45802	4.82756	4.03352	3.95897	4.41372	4.13541	5.38177	5.67351	5.45425	5.50318	4.022	3.84225	4.09266	3.98564
326	Weimai 6	3	Cultivar	1992	CHN	4.33602	4.78909	4.31734	4.48082	5.365	4.2115	5.07705	4.88452	4.66479	4.97602	4.55417	4.73166	4.78623	4.84375	4.90234	4.84411
327	Mianyang 11	6	Cultivar	1976	CHN	6.2399	6.25436	6.32758	6.27395	2.99725	2.97325	2.62581	2.86544	5.8858	6.09379	5.90918	5.96292	5.8685	6.2885	5.9276	6.0282
328	Mianyang 20	6	Cultivar	1988	CHN	5.42018	3.23498	4.91467	4.52328	4.84975	4.8025	4.04237	4.56487	5.3202	4.78437	5.00523	5.0366	4.893	5.08725	4.67421	4.88482
329	Baiyoumai	2	Landrace	Pre-1950	CHN	5.17767	5.91253	5.44664	5.51228	4.77991	4.90852	5.34622	5.01155	6.72135	6.34104	7.33462	6.79901	10.374	10.414	9.71141	10.1665
330	Taishan 4	1	Cultivar	1970	CHN	4.55771	4.6069	4.66128	4.60863	4.61956	4.91399	4.61323	4.71559	4.37487	5.22065	4.87561	4.82371	5.33796	7.30942	5.75354	6.13364
331	Chuanyu 6	6	Cultivar	1976	CHN	4.36822	4.62892	4.76207	4.5864	4.95162	3.88965	4.79027	4.54385	4.88023	7.15321	4.72052	5.58465	5.39166	5.38485	5.18893	5.32181
332	Colotana	1	Cultivar	1954	Abroad	5.46816	5.24895	5.39234	5.36982	4.45939	4.32469	4.85417	4.54608	6.63451	6.02511	6.3664	6.34201	5.14	5.57525	5.18981	5.30169
333	Zhengmai 9201	8	Cultivar	Post-2000	CHN	4.29266	4.37347	4.71406	4.46007	4.233	3.64475	4.30324	4.06033	5.27892	5.33075	5.05089	5.22019	6.229	6.0725	5.53491	5.94547
334	Ji 5265	1	Cultivar	2008	CHN	5.08136	5.05364	5.05199	5.06233	5.2405	5.8815	5.14707	5.42302	4.82885	4.76614	4.48995	4.69498	5.7595	5.802	5.56952	5.71034
335	Yangmai 18	6	Cultivar	2008	CHN	4.76494	4.76468	4.8956	4.80841	5.156	4.61075	4.96034	4.90903	4.63974	5.01186	4.71575	4.78912	4.89675	4.8105	4.8892	4.86548
336	AC Foremost	1	Cultivar	1995	Abroad	5.97088	5.95297	5.93448	5.95277	5.07625	4.932	5.11461	5.04095	6.12486	5.46498	5.5642	5.71801	5.63575	5.68875	5.4797	5.6014
337	Ningnuomai 1	6	Cultivar	2003	CHN	4.23367	4.4957	4.88051	4.53663	4.96075	6.91925	4.72823	5.53608	5.90523	5.99622	5.99183	5.96443	5.151	5.09025	4.98983	5.07703
338	Chuanmai 8	6	Cultivar	1962	CHN	5.87343	4.57773	4.49857	4.98324	5.33	5.3095	4.95387	5.19779	6.91306	7.54155	6.27602	6.91021	6.6055	6.49575	6.01837	6.37321
339	Zhengyin 4	6	Cultivar	1965	CHN	5.92439	5.51687	5.8953	5.77886	5.51975	4.94025	5.51831	5.3261	5.08021	5.74788	5.24907	5.35905	5.72675	5.95675	5.73394	5.80581
340	Xifeng	2	Cultivar	1983	CHN	4.82346	5.01294	4.93885	4.92508	4.65425	4.30225	4.83359	4.5967	5.24724	5.39714	5.81383	5.48607	4.892	5.68425	5.13661	5.23762
341	Zhenmai 6	6	Cultivar	2005	CHN	4.18597	6.4786	4.89789	5.18748	4.00175	3.85025	5.24017	4.36406	4.7099	4.63645	4.66813	4.6715	5.44425	4.75625	5.14689	5.1158
342	Chuanmai 36	1	Cultivar	2002	CHN	4.68636	4.11695	5.56947	4.79093	4.78175	4.72075	4.44935	4.65062	4.87903	5.31416	5.09826	5.09715	5.695	7.1255	5.75662	6.19237
343	Shannong 205	2	Cultivar	1954	CHN	5.20341	5.29773	5.63306	5.37806	4.88425	4.68075	5.09099	4.88533	6.40527	5.95296	5.21784	5.85869	4.5675	5.25775	4.97208	4.93244
344	Weimai 4	2	Cultivar	1970	CHN	5.29329	5.34139	5.91868	5.51779	4.62201	4.73312	4.9817	4.77894	7.39956	7.21465	7.89248	7.50223	5.54475	5.02475	5.18373	5.25108
345	Fielder	1	Cultivar	1974	Abroad	4.64485	5.02173	4.51881	4.72846	4.27176	4.32514	4.64675	4.41455	5.11407	4.93311	4.47789	4.84169	3.99447	4.71423	4.45182	4.38684
346	Emai 6	6	Cultivar	1966	CHN	5.26507	4.76308	5.64301	5.22372	5.095	4.95225	4.92904	4.9921	5.41042	5.89992	5.27639	5.52891	5.4665	5.31	5.23518	5.33723
347	Loukuding	2	Landrace	Pre-1950	CHN	4.26292	4.60354	4.87409	4.58018	4.49575	4.6725	4.54964	4.57263	5.22724	4.87581	5.17575	5.09293	5.6275	5.01925	5.06546	5.2374
348	Paozimai	1	Cultivar	Pre-1950	CHN	5.18863	5.42935	4.93586	5.18461	3.98653	4.75492	4.70794	4.48313	5.65184	6.13352	5.48217	5.75585	6.03975	6.8965	6.8814	6.60588
349	Yangmai 1	6	Cultivar	1967	CHN	4.64753	5.14367	4.69634	4.82918	4.05604	4.24964	4.59985	4.30184	5.0669	5.45031	5.03536	5.18419	5.78954	5.71379	5.36773	5.62369
350	Taishan 1	8	Cultivar	1979	CHN	5.37685	5.16215	5.01581	5.18494	4.18548	3.79013	4.67382	4.21648	4.9843	4.95851	4.69056	4.87779	5.29725	5.813	5.26136	5.4572
351	Yanshi 4	6	Cultivar	Pre-1977	CHN	5.08745	5.17913	4.99454	5.08704	5.52775	4.8255	5.35344	5.23556	5.62591	5.78044	5.44989	5.61875	5.89825	5.648	5.63323	5.72649
352	Penawa	1	Cultivar	1985	Abroad	5.83475	5.30281	5.53974	5.5591	3.61047	5.12191	4.45664	4.39634	5.54028	5.52195	4.95824	5.34016	4.21252	4.26542	4.31153	4.26316
353	Jingdong 22	8	Cultivar	2005	CHN	5.67883	5.68033	5.53008	5.62975	5.29	5.886	5.48516	5.55372	5.4964	5.01915	6.05188	5.52248	6.77325	6.21225	6.15689	6.3808
354	Pusa 6	1	Landrace	1906	Abroad	5.43115	6.22755	5.31953	5.65941	5.50519	5.58759	5.86637	5.65305	6.54793	7.25025	6.77128	6.85649	8.17833	5.886	6.64357	6.90263
355	Luyuan 301	1	Cultivar	2005	CHN	4.48969	4.44877	4.94727	4.62858	4.7975	4.788	4.62314	4.73621	5.39583	5.14359	5.16694	5.23545	5.317	5.29925	5.0798	5.23202
356	Shanmai	2	Landrace	Pre-1950	CHN	4.44064	4.72135	4.56388	4.57529	4.91415	4.92015	4.81775	4.88401	5.18499	5.49266	5.14027	5.27264	5.31568	5.94911	5.36085	5.54188
357	Chiyacao	2	Landrace	Pre-1950	CHN	5.3384	4.87341	5.53946	5.25042	4.59897	4.5891	4.73619	4.64142	6.28333	6.10145	6.12998	6.17159	4.5175	4.45575	4.56981	4.51435
358	Tumangmai	2	Landrace	Pre-1950	CHN	4.37179	4.48019	4.62239	4.49146	4.1617	4.22044	4.32094	4.23436	5.93513	4.65674	4.86135	5.15107	4.4285	4.32575	4.3584	4.37088
359	Huabei 187	8	Landrace	1958	CHN	4.77498	4.43135	4.4554	4.55391	4.41655	4.51829	4.42395	4.45293	5.55298	5.86687	4.94559	5.45515	4.7655	4.34575	4.51173	4.54099
360	Jing 411	8	Cultivar	1991	CHN	6.23086	6.30985	6.23401	6.25824	6.78175	6.2125	6.5458	6.51335	5.55387	6.78751	6.34546	6.22894	7.27	7.287	7.03427	7.19709
361	Hanxuan 3	8	Cultivar	1968	CHN	4.73087	4.57338	4.23847	4.51424	4.53636	4.79515	4.55487	4.6288	4.49232	4.69028	4.73612	4.63957	4.92088	5.16952	4.88176	4.99072
362	Wuyimai	6	Cultivar	1951	CHN	4.45253	4.21206	4.91204	4.52554	3.87274	3.81934	4.0424	3.91149	4.95534	4.83024	4.23806	4.67454	3.9395	3.36225	3.78138	3.69438
363	Wennong 6	8	Cultivar	2003	CHN	5.38808	5.02214	5.13893	5.18305	3.826	3.347	3.42407	3.53236	5.79419	5.56849	4.58823	5.31697	4.6235	4.95975	4.33577	4.63967
364	Kenong 199	1	Cultivar	2004	CHN	6.17368	6.3247	6.48089	6.32642	5.45775	5.59125	5.89122	5.64674	5.38405	4.93982	5.56585	5.29657	5.72225	5.341	5.65149	5.57158
365	Haocheng 9411	1	Cultivar	NA	CHN	4.72138	4.75556	4.32133	4.59942	4.64525	4.65423	4.7004	4.66662	4.13977	4.27358	4.329	4.24745	4.193	4.71375	4.53572	4.48082
366	Ning 9	2	Cultivar	1993	CHN	3.70545	4.31742	4.36468	4.12919	4.016	4.9705	4.56671	4.51774	5.06907	4.72319	5.15119	4.98115	5.414	5.91575	5.29882	5.54286
367	Tumai	2	Landrace	Pre-1953	CHN	4.767	4.94916	4.25404	4.65674	4.5403	5.99994	4.74473	5.09499	6.06074	5.73144	5.37289	5.72169	4.058	4.46975	4.42416	4.3173
368	Heputou	2	Landrace	1954	CHN	5.00673	5.26239	5.71493	5.32802	4.77454	5.65853	5.01847	5.15051	5.98535	5.14845	5.58096	5.57158	5.099	5.16	5.09249	5.11716
369	Glenlea	2	Cultivar	1972	Abroad	5.84805	5.67352	5.14084	5.55413	4.76264	4.33325	4.21808	4.43799	5.71706	5.79547	5.0791	5.53054	5.187	5.3535	4.91953	5.15334
370	Neixiang 185	6	Cultivar	2000	CHN	4.41797	4.35528	4.00135	4.2582	5.0945	5.0455	4.72489	4.95496	5.16129	5.34625	5.65993	5.38916	3.773	4.606	4.36796	4.24899
371	Wanyuan 66	8	Cultivar	NA	CHN	6.18274	6.54199	6.06616	6.26363	4.33118	4.28343	5.43658	4.68373	5.30968	5.43691	5.27729	5.34129	6.23875	6.04375	6.01064	6.09771
372	Jingyang 60	2	Cultivar	NA	CHN	5.29628	5.31996	5.23235	5.28286	4.59769	4.52523	4.95882	4.69391	5.92805	5.85409	5.10451	5.62888	4.86025	4.9105	4.90986	4.89354
373	Zhou 8425	1	Cultivar	1988	CHN	4.09142	4.24583	4.05854	4.13193	4.13775	3.82	4.19179	4.04985	5.36863	5.05978	4.78863	5.07234	5.17725	5.71975	5.0296	5.30887
374	935106	3	Cultivar	2006	CHN	4.0744	4.77012	4.39851	4.41434	5.00275	4.94775	4.88643	4.94564	5.08347	5.29889	5.15991	5.18075	5.4485	5.5715	5.30214	5.44071
375	Zhongluo 08-1	1	Cultivar	NA	CHN	5.15058	4.8853	5.10255	5.04614	5.3125	4.69225	5.0989	5.03455	4.88346	4.64928	4.61857	4.7171	4.28	4.279	4.55263	4.37054
376	Qianjiaomai	8	Cultivar	1950	CHN	6.19293	6.2943	6.32544	6.27089	4.47776	4.54576	4.38603	4.46985	5.9774	4.58085	5.1398	5.23268	4.89625	4.8875	4.72326	4.83567
377	Jimai 20	1	Cultivar	1989	CHN	4.52864	4.82137	4.70236	4.68412	5.213	5.28075	5.01718	5.17031	3.98197	5.61422	4.91591	4.83737	5.485	5.116	5.20606	5.26902
378	Nongda 183	2	Cultivar	1955	CHN	4.77598	4.98505	4.46661	4.74255	4.32615	4.36288	4.6556	4.44821	6.24776	6.29317	5.0603	5.86707	4.57025	4.31925	4.51503	4.46818
379	Lumai 11	4	Cultivar	1981	CHN	4.58999	5.15818	4.73941	4.82919	5.21825	5.261	5.18822	5.22249	5.43738	5.77805	5.50454	5.57333	5.81525	4.97675	5.32674	5.37291
380	Lumai 3	4	Cultivar	1978	CHN	4.33025	4.58579	4.14134	4.35246	4.86325	4.55875	4.72452	4.71551	5.49841	5.42417	5.3858	5.43613	6.10025	5.99775	5.60751	5.90184
381	Shanhe 6	4	Cultivar	1970	CHN	4.10964	4.30775	4.60243	4.33994	3.91381	3.93407	4.11078	3.98622	4.32274	4.33437	4.2466	4.30124	4.483	4.1565	4.25009	4.29653
382	Lumai 12	4	Cultivar	1983	CHN	4.92638	4.55244	5.01233	4.83038	5.458	5.293	5.00522	5.25207	5.68961	5.19066	5.25737	5.37922	4.7895	4.729	4.84124	4.78658
383	Chuanmai 22	6	Cultivar	1980	CHN	5.01495	5.72215	5.40165	5.37958	5.05245	5.00577	5.3873	5.14851	6.48444	6.50279	5.96357	6.31693	6.4005	6.419	6.06893	6.29614
384	Een 1	4	Cultivar	1986	CHN	4.82241	4.35611	4.12258	4.4337	6.09996	4.63122	5.22804	5.31974	4.59433	5.36923	4.54875	4.83744	4.4207	4.12308	4.5906	4.37813
385	Fengkang 7	4	Cultivar	1973	CHN	5.59021	4.94045	5.53802	5.35623	5.00725	5.1097	4.97385	5.03027	6.03718	6.48014	6.46586	6.32773	5.25069	5.60823	5.27759	5.37884
386	Jinan 8	4	Cultivar	1965	CHN	4.77143	4.95486	4.68378	4.80336	4.21175	4.07959	4.5833	4.29155	4.39697	3.69987	4.5018	4.19955	5.02885	4.4322	4.68145	4.71417
387	Jimai 23	4	Cultivar	1983	CHN	6.28462	5.9201	5.9733	6.05934	5.802	5.34675	5.86105	5.66993	5.18109	5.73794	5.62511	5.51472	6.3475	6.7	6.30285	6.45012
388	Yumai 47	3	Cultivar	1997	CHN	6.90188	7.06166	6.79114	6.91823	6.1015	6.24275	6.58158	6.30861	5.00863	5.12456	4.94438	5.02585	3.58175	8.17475	7.11269	6.28973
389	Maoyingafu	4	Cultivar	1961	CHN	5.03821	4.72486	5.60505	5.12271	4.5714	5.15001	4.64813	4.78985	4.91744	4.77694	5.0372	4.91053	5.04416	5.54987	5.08072	5.22492
390	Shannong 9	4	Cultivar	1960	CHN	4.36481	4.3835	4.87085	4.53972	4.35586	4.31277	4.36968	4.3461	5.92052	4.35244	5.08226	5.11841	5.0135	5.23175	4.87164	5.03896
391	Youmang 7	4	Cultivar	1979	CHN	4.94865	4.99573	5.32855	5.09098	5.02084	5.54531	5.00828	5.19148	6.13948	6.23063	6.61479	6.3283	5.15958	6.06621	5.41136	5.54572
392	Chuanmai 42	6	Cultivar	1996	CHN	4.99754	5.1414	5.22558	5.12151	5.477	5.20475	5.3092	5.33032	5.87575	6.37398	5.46583	5.90519	5.317	4.62525	5.08382	5.00869
393	Zhouzhou 17	4	Cultivar	1967	CHN	4.67938	5.11123	5.18261	4.99107	4.12277	4.36103	4.617	4.36693	7.90608	8.27031	7.46838	7.88159	4.13803	4.47554	4.41019	4.34125
394	Xinmai 16	4	Cultivar	2000	CHN	4.1616	4.47268	4.04154	4.22527	4.355	4.14375	4.41384	4.3042	2.95257	3.98858	3.62877	3.52331	3.79	3.89025	4.03136	3.90387
395	Yumai 21	1	Cultivar	1992	CHN	3.68253	3.75031	3.0523	3.49505	4.0025	4.06675	3.87641	3.98189	4.70162	4.40136	4.71112	4.6047	5.365	5.5725	4.93797	5.29182
396	Luomai 26	1	Cultivar	2011	CHN	3.89662	3.79284	3.89682	3.8621	3.38025	3.54825	3.58654	3.50501	4.88759	4.96788	4.45145	4.76897	4.9185	4.7115	4.40551	4.6785
397	Kaimai 21	1	Cultivar	2008	CHN	4.66928	4.4076	4.31323	4.46337	2.4725	2.502	3.44005	2.80485	5.18007	5.54043	5.29136	5.33729	5.192	5.263	4.63168	5.02889
398	Zhongyu 9398	1	Cultivar	2009	CHN	5.49471	4.30826	5.64624	5.14974	3.8665	3.4955	4.08738	3.81646	4.82311	4.79922	4.8847	4.83568	6.3355	6.3015	6.57479	6.40393
399	Zhoumai 12	1	Cultivar	2000	CHN	3.98446	4.13262	3.64011	3.91907	3.27575	3.81675	3.70419	3.5989	4.28352	4.01048	4.69842	4.33081	5.995	5.574	6.09106	5.88669
400	SENMARQ	7	NA	NA	Abroad	5.74876	5.21629	4.63126	5.19877	4.27163	4.00613	4.74396	4.34057	5.09733	6.02958	5.23157	5.45283	3.59125	4.06175	4.13232	3.92844
401	SUNSET	2	Cultivar	1900	Abroad	5.0309	4.86917	6.37527	5.42511	4.4197	4.27689	4.64444	4.44701	8.59992	6.34156	5.6206	6.85403	3.985	3.816	4.14848	3.98316
402	BARBELA GROSSO	7	Landrace	1949	Abroad	7.29155	6.6459	6.23375	6.72373	5.18669	5.27519	5.91629	5.45939	6.7359	7.28543	6.66853	6.89662	13.9945	13.7317	13.2142	13.6468
403	Aimengniu Ⅳ	4	Cultivar	1970	CHN	4.99557	5.33689	4.58541	4.97263	6.554	6.33025	5.94545	6.27657	5.42105	5.98087	6.33518	5.91237	7.25425	7.6775	6.95907	7.29694
404	Aimengniu Ⅴ	4	Cultivar	1970	CHN	4.61	4.56083	4.31326	4.4947	4.80475	4.81	4.68279	4.76585	4.33343	4.99072	5.11598	4.81337	6.2045	6.2045	5.69726	6.03542
405	Bainong 791	4	Cultivar	1987	CHN	5.19495	4.92418	5.3042	5.14111	5.42325	5.04475	5.17372	5.21391	5.08288	5.66431	5.24538	5.33086	5.6085	5.75675	5.51299	5.62608
406	Baiyoubao	3	Cultivar	1970	CHN	4.56322	4.33006	4.227	4.37342	3.66826	4.49091	3.99916	4.05277	4.70822	4.53714	4.66871	4.63802	4.807	4.31775	4.37464	4.4998
407	Hezuo 4	4	Cultivar	1950	CHN	5.39322	5.24944	5.13456	5.25907	4.84602	5.58293	5.04773	5.15889	5.9911	6.47099	5.68968	6.05059	5.495	5.1385	5.22708	5.28686
408	Jinmai 30	4	Cultivar	1984	CHN	4.17745	5.11839	4.93566	4.74383	5.06827	5.13109	5.09333	5.09756	6.30125	5.34474	5.6052	5.7504	5.38325	5.83575	5.43744	5.55215
409	Huangguaxian	2	Landrace	Pre-1950	CHN	5.65231	5.51326	5.11674	5.42744	5.14446	4.89611	5.32886	5.12314	6.97175	6.85223	6.7607	6.86156	5.41425	5.09625	5.27979	5.26343
410	Fumai	2	Landrace	Pre-1950	CHN	5.00909	5.14065	5.30479	5.15151	4.68757	4.60455	4.91411	4.73541	6.00891	6.05269	6.24407	6.10189	5.11875	5.274	5.10229	5.16501
411	Meiqianwu	2	Landrace	Pre-1950	CHN	5.29528	5.91482	5.01199	5.40736	5.01587	4.88062	5.46534	5.12061	7.43057	5.68604	5.70065	6.27242	4.79075	4.5145	4.92353	4.74293
412	Sifangmai	2	Landrace	Pre-1950	CHN	5.26492	5.50335	5.15249	5.30692	4.13379	4.09039	4.81857	4.34758	5.94727	5.99537	6.08997	6.01087	5.23225	5.04275	5.03119	5.10206
413	Wuximai	2	Landrace	Pre-1955	CHN	5.04694	5.23092	5.33229	5.20339	4.71944	4.93123	4.97518	4.87528	5.9516	5.77965	5.11704	5.6161	4.46831	4.30444	4.58264	4.4518
414	Songhuajing 1	8	Cultivar	1929	Abroad	5.05585	5.24914	5.56178	5.28892	4.709	4.47452	4.97907	4.72086	6.06133	5.73933	5.80403	5.86823	4.77625	4.98325	4.91286	4.89079
415	Mangmai	2	Landrace	Pre-1950	CHN:Beijing	5.08196	4.94744	5.88154	5.30364	5.06486	4.80697	5.00615	4.95932	6.49422	6.40839	6.33848	6.4137	4.71425	4.2345	4.65163	4.53346
416	Zhenmai 168	6	Cultivar	2004	CHN	3.98665	3.90631	4.33228	4.07508	3.998	6.31696	3.95215	4.7557	4.66081	6.28727	5.76247	5.57018	6.30963	6.38897	6.55025	6.41628
417	Xian 8	6	Cultivar	1978	CHN	5.86924	5.95484	4.9182	5.58076	5.5015	5.17125	5.72817	5.46697	5.19433	5.94235	5.47311	5.5366	6.05375	6.58225	6.12139	6.25246
418	Han 4564	8	Cultivar	1998	CHN	5.76468	5.12657	5.53891	5.47672	5.8955	5.8785	5.51104	5.76168	5.78699	5.39582	5.89458	5.69246	6.01825	6.1405	5.88993	6.01623
419	Yumai 70	6	Cultivar	2003	CHN	4.41426	4.17354	4.33267	4.30682	4.04525	4.46175	4.10939	4.20546	4.82064	4.46525	4.56471	4.61687	4.41175	5.01825	4.51313	4.64771
420	Avocet	8	Cultivar	2006	CHN	5.76925	5.57375	5.21503	5.51934	5.2945	5.79124	5.43413	5.50662	6.38542	6.35187	6.21973	6.319	6.48253	7.6342	6.51695	6.87789
421	Liuzhutou	2	Landrace	Pre-1950	CHN	5.31896	5.42947	5.28571	5.34471	4.44643	4.42644	4.93795	4.6036	6.15054	6.2068	6.31607	6.22447	5.37125	5.80825	5.37248	5.51733
422	Chayaada 29	1	Landrace	NA	CHN	4.47092	4.61948	5.1059	4.7321	4.41257	4.46822	4.51603	4.4656	5.02002	5.31121	5.35458	5.2286	3.5755	3.72875	3.94009	3.74811
423	Gezhoumai	2	Landrace	Pre-1950	CHN	5.44748	5.16211	5.27877	5.29612	4.2676	4.06572	4.71485	4.34939	6.12095	6.58673	6.10864	6.27211	5.13925	5.69825	5.18412	5.34054
424	Xinyang 12	1	Cultivar	1970	CHN	5.62621	5.1672	5.43307	5.40883	4.37626	4.39332	4.77173	4.51377	4.96482	5.46799	4.5203	4.98437	4.20275	4.6595	4.54466	4.46897
425	Boai 7023	6	Cultivar	1970	CHN	4.64256	6.05042	6.19299	5.62866	4.63894	4.63678	5.34468	4.87347	5.46024	5.49739	5.58084	5.51282	6.6455	5.46275	5.81764	5.9753
426	Xiaobaimang	8	Landrace	Pre-1950	CHN	4.04225	5.0603	5.06967	4.72407	3.8415	3.98792	4.4509	4.09344	4.81076	4.83207	4.33197	4.65827	4.19725	4.41875	4.35563	4.32388
427	Jinghua 2	8	Cultivar	1985	CHN	4.92776	4.6852	4.83152	4.81483	4.76775	4.724	4.72648	4.73941	6.61375	6.21477	6.53725	6.45526	5.274	5.3755	5.12533	5.25828
428	Dongfanghong 3	4	Cultivar	1968	CHN	5.42401	4.10013	4.58926	4.70447	4.3969	5.18948	4.24852	4.61163	6.53253	6.79462	6.23433	6.52049	6.981	7.60775	6.87909	7.15595
429	Xindong 20	4	Cultivar	1987	CHN	4.38515	3.75578	4.28047	4.14047	4.24975	4.77425	4.00276	4.34225	2.54021	5.38675	4.01982	3.98226	4.745	4.38925	4.379	4.50442
430	Xuzhou 8	4	Cultivar	1962	CHN	4.70645	4.79167	4.41943	4.63919	4.35028	4.1088	4.57098	4.34335	5.06478	4.99387	4.42828	4.82897	4.11125	4.89825	4.52683	4.51211
431	Yumai 15	4	Cultivar	1984	CHN	5.12599	4.80334	4.88871	4.93935	4.768	4.6795	4.78567	4.74439	5.91943	6.13827	5.19381	5.7505	4.9825	5.43275	5.06697	5.16074
432	RIETI	8	Landrace	1900	Abroad	3.92125	3.73312	3.04492	3.56643	4.45868	4.45832	4.0959	4.33764	4.87584	4.90715	4.60897	4.79732	4.49275	4.199	4.26255	4.3181
433	Huoliaomai	2	Landrace	Pre-1950	CHN	4.50594	4.75246	4.84375	4.70072	4.15346	4.35024	4.45296	4.31889	4.28801	4.35223	4.7335	4.45791	5.56225	5.03575	5.01699	5.205
434	Baimaokechun	2	Landrace	Pre-1950	CHN	5.29063	5.11333	5.05208	5.15201	4.00899	5.31734	4.56116	4.62916	6.52409	5.80019	5.51298	5.94575	4.6975	4.6645	4.64105	4.66768
435	Pubing 202	4	Cultivar	NA	CHN	4.81186	4.49143	4.24361	4.51563	4.10963	4.38683	4.30053	4.26566	5.59071	5.52512	5.02444	5.38009	5.09578	4.87167	4.75599	4.90781
436	Zhamengmai	2	Landrace	Pre-1950	CHN	4.74092	5.33515	5.0147	5.03026	4.73715	4.75438	5.03615	4.84256	5.12356	5.55657	5.1569	5.27901	5.59275	5.19125	5.27338	5.35246
437	Xinong 1376	4	Cultivar	1995	CHN	3.15372	3.95128	3.79512	3.63337	4.61956	4.23101	4.28542	4.37867	4.8576	5.13753	4.85187	4.949	5.467	5.5045	5.08564	5.35238
438	92R137	6	Cultivar	1970	CHN	5.27749	5.51954	5.45657	5.41787	5.56943	5.82543	5.54448	5.64645	5.71091	4.36643	5.70556	5.26097	5.58035	5.42309	5.51597	5.50647
439	Luofulin 10	8	Cultivar	Pre-1950	Abroad	5.51853	5.49041	5.83726	5.6154	4.83344	5.21736	5.16192	5.07091	6.51401	5.97308	5.94473	6.14394	6.10281	6.71724	5.99399	6.27135
440	Mingxian 169	2	Cultivar	NA	CHN	7.29732	7.30621	7.38879	7.33077	5.17789	5.27338	6.24205	5.56444	6.96042	6.90545	6.26285	6.70958	6.55475	6.285	6.3606	6.40012
441	Bainong 207	3	Cultivar	2013	CHN	3.8945	4.5595	4.2872	4.24707	6.052	6.884	6.30575	6.41392	5.63749	4.65036	5.92941	5.40576	5.26675	6.56675	5.04642	5.62664
442	Jimai 22	3	Cultivar	2007	CHN	4.56873	4.34746	4.10921	4.3418	4.99975	4.69325	4.6736	4.78887	4.3999	4.45926	4.5238	4.46099	4.47825	4.75025	4.63403	4.62084
443	Xinong 511	1	Cultivar	2018	CHN	4.64369	4.61149	4.45727	4.57082	4.89875	4.6015	4.75512	4.75179	4.09724	4.73112	4.6555	4.49462	5.26775	5.21625	5.07971	5.1879
