# Supplementary material for: A genome-wide association study revealed the genetic variation and candidate genes for grain copper content in bread wheat (Triticum aestivum L.)
Source: Royal Society of Chemistry journal article supplement (doi:10.1039/d1fo04173h), 2022-01-01
Supplement: d1fo04173h3.xlsx [file d1fo04173h3.xlsx]

## Sheet: Table S3
Table S3 Two-factor of variance analysis of grain Cu content in 443 wheat accessions
Source of Variation	DF	SS	MSjf	F	P
Genotype	442	1633.02	3.7	26.88	<0.001
Environment	3	438.51	146.17	1063.45	<0.001
Interaction	1326	1704.79	1.29	9.35	<0.001
Residual	3544	487.12	0.137
Total	5315	4263.44
