# Supplementary material for: A genome-wide association study revealed the genetic variation and candidate genes for grain copper content in bread wheat (Triticum aestivum L.)
Source: Royal Society of Chemistry journal article supplement (doi:10.1039/d1fo04173h), 2022-01-01
Supplement: d1fo04173h4.xlsx [file d1fo04173h4.xlsx]

## Sheet: Table S4
Table S4 Expression pattern of 2574 candidate genes in different tissues of wheat plants
gene	The organs of wheat plants
	Root_1	Root_2	Root_3	Root	Stem_1	Stem_2	Stem_3	Stem	Leaf_1	Leaf_2	Leaf_3	Leaf	Spike_1	Spike_2	Spike_3	Spike	Grain_1	Grain_2	Grain_3	Grain
TraesCS7D02G147000	8.33	8.94	8.77	8.68	8.84	8.49	7.02	8.11667	8.39	7.94	6.94	7.75667	8.98	8.2	8.12	8.43333	8.41	5.42	7.36	7.06333
TraesCS1D02G001200	0	5.06	0.12	1.72667	0	0	0.05	0.0166667	0	0	0	0	0	0.15	0	0.05	0	15.08	5.87	6.98333
TraesCS3D02G529500	7.92	7.73	7.84	7.83	7.54	8.05	8.13	7.90667	6.95	6.59	6.63	6.72333	7.01	7.78	7.52	7.43667	8.13	4.84	6.43	6.46667
TraesCS5D02G480200	8.25	8.67	8.54	8.48667	9	8.79	7.62	8.47	7.49	7.27	6.29	7.01667	8.52	9.19	8.06	8.59	8.45	4.97	5.57	6.33
TraesCS5D02G492900	8.4	8.72	8.6	8.57333	8.45	8.29	6.17	7.63667	7.33	7.49	6.75	7.19	8.75	8.93	7.58	8.42	6.96	4.6	7.36	6.30667
TraesCS7D02G136800	8.24	7.82	7.94	8	7.95	7.87	7.16	7.66	7.3	6.78	6.54	6.87333	7.34	7.79	7.65	7.59333	7.66	5.3	5.91	6.29
TraesCS5D02G492400	9.06	8.43	8.56	8.68333	8.68	8.69	8.11	8.49333	7.8	7.38	7.48	7.55333	7.82	8.27	7.88	7.99	7.87	4.76	6.06	6.23
TraesCS1D02G000300	1.15	3.99	0.39	1.84333	0	0	0.02	0.00666667	0	0	0.02	0.00666667	0	0.05	0.02	0.0233333	0	13.86	4.78	6.21333
TraesCS1D02G000200	3.85	3.77	0.75	2.79	0	0	0	0	0	0	0.03	0.01	0	0	0	0	0	13.65	4.96	6.20333
TraesCS4A02G027800	6.81	8.32	8.42	7.85	6.09	7.22	7.05	6.78667	5.71	6.16	7.2	6.35667	5.15	6.01	7.13	6.09667	6.01	4.98	7.47	6.15333
TraesCS1D02G001100	0.05	3.6	0.06	1.23667	0	0.02	0	0.00666667	0.05	0	0	0.0166667	0	0.03	0	0.01	0	13.54	4.88	6.14
TraesCS1D02G004200	7.2	7.08	7.18	7.15333	7.07	6.75	6.71	6.84333	6.61	6.1	6.78	6.49667	6.14	6.65	6.45	6.41333	6.59	4.35	7.47	6.13667
TraesCS6B02G058300	7.65	7.28	7.27	7.4	7.54	6.76	5.31	6.53667	7.26	6.15	6.77	6.72667	7.1	7.51	7.6	7.40333	8.43	5.14	4.66	6.07667
TraesCS5D02G509700	6.55	6.33	6.18	6.35333	6.62	6.4	5.31	6.11	6.37	6.28	4.92	5.85667	7.51	6.9	7.17	7.19333	6.89	4.06	6.86	5.93667
TraesCS4A02G022600	7.27	7.1	7.02	7.13	7.7	7.24	5.62	6.85333	6.97	6.78	4.8	6.18333	7.83	6.69	6.86	7.12667	7.35	3.52	6.72	5.86333
TraesCS6B02G056800	4	4.6	4.49	4.36333	5.55	9.1	7.5	7.38333	7.82	5.4	7.98	7.06667	1.42	3.85	6.86	4.04333	7.91	3.87	5.66	5.81333
TraesCS5D02G481200	5.86	7.02	6.92	6.6	5.48	7.08	3.07	5.21	4.58	6.69	7.88	6.38333	6.24	5.13	4.76	5.37667	6.58	3.98	6.8	5.78667
TraesCS5D02G286200	7.93	7.35	7.26	7.51333	7.93	6.93	5.11	6.65667	7.56	6.86	4.79	6.40333	7.45	6.46	6.45	6.78667	6.97	3.65	6.26	5.62667
TraesCS1D02G001400	0.34	3.27	0.03	1.21333	0.02	0	0.15	0.0566667	0	0	0.09	0.03	0	0.08	0	0.0266667	0	12.97	3.9	5.62333
TraesCS6D02G355000	5.9	5.52	5.52	5.64667	6.04	6.17	6.42	6.21	5.61	5.39	6.29	5.76333	5.25	5.86	5.92	5.67667	6.41	5.4	4.65	5.48667
TraesCS5D02G529700	6.67	6.22	6.23	6.37333	6.02	6.35	5.39	5.92	5.21	4.95	5.43	5.19667	6.05	6.2	6.28	6.17667	6.87	3.73	5.83	5.47667
TraesCS5D02G286500	6.35	6.24	6.34	6.31	6.27	6.19	5.26	5.90667	5.5	4.67	4.91	5.02667	5.94	6.3	5.92	6.05333	6.48	3.82	5.98	5.42667
TraesCS1D02G003300	5.14	5.03	5.06	5.07667	5.18	5.28	5.1	5.18667	4.38	4.42	4.22	4.34	5.76	4.92	5.73	5.47	5.56	3.62	7.02	5.4
TraesCS1A02G033501	0	3.32	0	1.10667	0	0	0.02	0.00666667	0	0	0	0	0	0	0	0	0	13.27	2.91	5.39333
TraesCS1D02G251100	6.35	6.65	6.47	6.49	6.02	6.73	5.93	6.22667	5.21	5.65	6.31	5.72333	5.76	6.5	6.38	6.21333	6.32	3.8	5.97	5.36333
TraesCS5D02G558800	0.51	0.18	0.21	0.3	0.52	0.6	0	0.373333	0.53	0.17	4.65	1.78333	1.22	1.68	0.36	1.08667	1.91	5.68	8.32	5.30333
TraesCS5D02G527100	6.91	6.42	6.29	6.54	6.78	6.06	5.31	6.05	6.04	5.55	4.83	5.47333	6.89	6.16	6.35	6.46667	6.59	3.42	5.81	5.27333
TraesCS1A02G020500	6.78	7.11	6.83	6.90667	7.59	7.49	6.49	7.19	5.89	6.13	5.33	5.78333	7.5	8.21	6.88	7.53	6.48	3.01	6.21	5.23333
TraesCS6D02G356300	6.45	7.48	7.01	6.98	7.29	6.17	3.76	5.74	6.56	6.06	4.08	5.56667	7.21	6.31	6.15	6.55667	6.5	2.64	6.49	5.21
TraesCS1D02G002063	0	2.61	0.02	0.876667	0	0	0	0	0	0	0	0	0	0	0	0	0	12.42	3.1	5.17333
TraesCS6D02G384200	7.37	6.4	6.36	6.71	6.56	6.23	5.74	6.17667	5.97	5.2	5.01	5.39333	5.63	6.33	5.83	5.93	6.34	4.04	4.93	5.10333
TraesCS1D02G249900	7.08	6.39	6.35	6.60667	6.45	6.2	5.72	6.12333	6.12	5.57	5.34	5.67667	6.28	6.34	6.7	6.44	6.45	3.3	5.51	5.08667
TraesCS1D02G000567	0	2.34	0	0.78	0	0	0	0	0	0	0	0	0	0	0	0	0	12.96	2.3	5.08667
TraesCS1D02G000700	0	2.3	0	0.766667	0	0	0	0	0	0	0	0	0	0	0	0	0	12.01	3.03	5.01333
TraesCS1D02G001300	0	2.38	0.01	0.796667	0	0	0	0	0	0	0.02	0.00666667	0	0	0	0	0	12.17	2.8	4.99
TraesCS4A02G017200	7.46	6.88	6.97	7.10333	6.25	7.91	4.31	6.15667	5.8	6.23	7.22	6.41667	6.75	6.53	5.44	6.24	6.68	4.29	3.83	4.93333
TraesCS7D02G142600	7.44	7.2	7.03	7.22333	7.61	7.07	7.67	7.45	6.96	6.23	5.99	6.39333	6.43	7.78	7.04	7.08333	7.12	2.68	4.99	4.93
TraesCS1A02G019000	5.97	6.03	6.03	6.01	5.91	6.67	6.33	6.30333	6.02	5.47	5.9	5.79667	5.64	6.06	6.04	5.91333	5.86	2.73	6.2	4.93
TraesCS5D02G286400	6.62	6.05	6.12	6.26333	6.72	5.75	4.33	5.6	6.62	5.66	3.51	5.26333	6.5	5.35	5.8	5.88333	6.12	3.26	5.38	4.92
TraesCS4A02G020000	0.9	0.35	0.1	0.45	0.12	0.99	0.01	0.373333	0.03	0.05	1.53	0.536667	0.01	0.59	0.09	0.23	0.58	5.68	8.09	4.78333
TraesCS5D02G509600	5.37	5.3	5.2	5.29	5.86	5.36	4.95	5.39	5.59	5.41	4.87	5.29	6.24	5.81	6.09	6.04667	5.74	3.18	5.26	4.72667
TraesCS6D02G344400	6.42	6.97	7.05	6.81333	6.07	6.75	5.22	6.01333	4.73	6.5	6.82	6.01667	6.92	5.88	5.01	5.93667	6.67	3.12	4.3	4.69667
TraesCS4A02G016400	4.5	4.42	4.32	4.41333	3.43	6.01	5.83	5.09	2.35	4.97	5.27	4.19667	1.49	3.79	5.06	3.44667	4.7	4.59	4.8	4.69667
TraesCS5D02G558900	0.18	0.43	0.38	0.33	0.03	0.3	0	0.11	0.08	0	1.39	0.49	0.26	0.7	0.24	0.4	1.23	5.42	7.18	4.61
TraesCS6D02G378400	4.78	5.46	5.34	5.19333	5.32	5.23	5.96	5.50333	4.32	3.93	2.95	3.73333	4.92	5.44	4.83	5.06333	4.31	3.41	6.08	4.6
TraesCS6D02G371200	4.9	4.74	4.55	4.73	5.55	5.31	4.8	5.22	5.75	4.79	4.8	5.11333	5.7	5.7	5.81	5.73667	6.11	2.87	4.81	4.59667
TraesCS7A02G131287	4.8	4.39	4.39	4.52667	5.07	4.13	0.03	3.07667	0.39	1.82	0.03	0.746667	4.23	4.3	3.6	4.04333	4.84	6.41	2.54	4.59667
TraesCS5D02G516100	5.3	5.79	5.4	5.49667	4.75	4.91	3.07	4.24333	4.88	4.11	3.53	4.17333	4.61	4.57	5.92	5.03333	5.68	3.17	4.89	4.58
TraesCS6D02G350200	6.73	6.25	6.38	6.45333	6.41	5.9	5.27	5.86	5.77	4.91	4.89	5.19	6.31	5.89	5.85	6.01667	6.07	3.36	4.17	4.53333
TraesCS7A02G137100	5.47	5.37	5.4	5.41333	5.01	5.23	5.17	5.13667	4.49	4.23	5.21	4.64333	5.09	5.37	5.56	5.34	5.39	3.16	4.97	4.50667
TraesCS6D02G390700	2.89	3.4	3.22	3.17	3.26	3.03	2.69	2.99333	3.5	2.7	2.05	2.75	5.03	4.34	4.84	4.73667	5.81	2.61	5.09	4.50333
TraesCS5D02G282700	4.47	4.98	5.2	4.88333	5.21	5.04	5.48	5.24333	4.33	4.73	4.72	4.59333	5.3	5.84	5.53	5.55667	5.46	2.53	5.5	4.49667
TraesCS5D02G550700	5.66	5.25	5.14	5.35	4.94	4.77	3.73	4.48	3.39	3.47	3.04	3.3	5.59	4.79	5.89	5.42333	5.9	3.28	4.21	4.46333
TraesCS6D02G369400	0.03	1.27	1.05	0.783333	2.29	1.76	4.02	2.69	2.36	1.25	0.28	1.29667	4.39	4.9	3.47	4.25333	6.31	1.27	5.8	4.46
TraesCS3D02G527800	5.42	5.26	5.28	5.32	5.14	5.11	4.61	4.95333	4.61	4.48	4.45	4.51333	5.37	4.89	5.22	5.16	5.09	2.87	5.36	4.44
TraesCS1D02G000800	4.8	4.48	4.47	4.58333	5.84	5.41	6.75	6	8.3	6.99	6.27	7.18667	5.07	5.15	5.65	5.29	6.08	2.89	4.31	4.42667
TraesCS5D02G541100	5.03	4.58	4.66	4.75667	5.57	5.4	3.95	4.97333	4.42	3.93	3.68	4.01	5.56	5.55	5.21	5.44	5.42	2.61	5.19	4.40667
TraesCS5D02G543600	5.92	5.68	5.68	5.76	6.01	5.47	5	5.49333	5.15	4.84	4.45	4.81333	5.99	5.89	5.55	5.81	5.53	2.59	5.03	4.38333
TraesCS1A02G015300	5.14	5.07	5.38	5.19667	4.56	4.82	4.85	4.74333	3.93	3.68	4.29	3.96667	3.74	5.32	4.68	4.58	5.48	3.66	4	4.38
TraesCS5D02G565600	0.28	0.61	0.5	0.463333	0.36	0.5	0.28	0.38	0.14	0.16	0.96	0.42	0.46	0.83	0.52	0.603333	0.46	5.09	7.58	4.37667
TraesCS6D02G393900	5.11	4.53	4.76	4.8	5.3	4.77	4.25	4.77333	4.42	4.24	3.96	4.20667	5.44	4.7	4.96	5.03333	4.89	2.7	5.49	4.36
TraesCS5D02G531200	5.19	4.8	4.79	4.92667	4.71	4.69	3.97	4.45667	3.93	4.52	4.82	4.42333	5.03	4.78	4.61	4.80667	4.44	2.72	5.89	4.35
TraesCS5D02G280500	5.13	4.8	5.01	4.98	5.44	4.88	4.35	4.89	4.14	4.08	4.03	4.08333	5.81	5.28	5.33	5.47333	4.9	2.49	5.54	4.31
TraesCS1A02G028200	4.1	4.52	4.75	4.45667	1.7	1.64	0	1.11333	5.27	0	2.01	2.42667	0.94	0.47	0.32	0.576667	3.49	2.18	7.25	4.30667
TraesCS5D02G480000	4.21	4.35	4.43	4.33	4.37	4.64	4.85	4.62	3.76	4.15	4.41	4.10667	4.77	4.77	5.24	4.92667	5.2	3.04	4.67	4.30333
TraesCS5D02G481100	6.31	5.68	5.68	5.89	6.08	4.8	2.55	4.47667	5.5	5.03	1.82	4.11667	5.24	3.81	4.43	4.49333	5.28	1.72	5.87	4.29
TraesCS5D02G517200	7.12	6.7	6.73	6.85	6.88	7.29	5.62	6.59667	6.35	6.09	3.39	5.27667	6.27	7.47	5.91	6.55	6.04	3.06	3.71	4.27
TraesCS5D02G513700	6.87	5.95	6	6.27333	5.33	6.43	4.42	5.39333	6.02	4.92	5.27	5.40333	4.36	4.95	5.62	4.97667	6.96	1.86	3.95	4.25667
TraesCS6D02G383300	4.87	4.88	4.91	4.88667	4.38	4.94	5.17	4.83	3.81	4.12	4.59	4.17333	4.88	4.99	5.29	5.05333	5.02	3.04	4.7	4.25333
TraesCS5D02G473100	4.9	5.01	4.96	4.95667	5.18	4.95	4.48	4.87	4.51	4.56	4.5	4.52333	5.48	4.82	5.53	5.27667	5.44	2.2	5.09	4.24333
TraesCS5D02G482800	6.09	7.06	7.04	6.73	5.63	8.05	8.2	7.29333	4.81	6.72	8.54	6.69	5.1	6.47	7.04	6.20333	6.43	3.43	2.79	4.21667
TraesCS4A02G020400	4.6	3.94	4.24	4.26	4.92	4.62	3.22	4.25333	3.66	3.62	4.01	3.76333	5.11	4.8	4.49	4.8	4.67	2.24	5.72	4.21
TraesCS7A02G131700	4.07	4.19	4.26	4.17333	4.38	4.35	3.55	4.09333	3.36	3.42	3.89	3.55667	4.51	4.28	4.26	4.35	4.23	2.48	5.92	4.21
TraesCS6D02G392000	4.79	4.97	5.04	4.93333	4.92	4.58	4.55	4.68333	4.14	4.45	4.43	4.34	5.36	5.15	5.5	5.33667	5.24	2.44	4.9	4.19333
TraesCS5D02G479600	4.15	4.25	4.28	4.22667	4.53	4.2	3.74	4.15667	3.47	3.6	3.28	3.45	4.55	4.42	4.43	4.46667	4.31	2.48	5.78	4.19
TraesCS5A02G398500	0.29	0.78	0.4	0.49	5.02	4.79	0.34	3.38333	1.37	2.02	0.1	1.16333	5.79	5.71	5.84	5.78	6.91	3	2.64	4.18333
TraesCS3D02G528600	6.04	5.09	5.22	5.45	5.83	5.23	2.97	4.67667	5.34	4.13	1.97	3.81333	5.62	5.49	5.72	5.61	6.15	2.74	3.66	4.18333
TraesCS6D02G384500	6.88	6.63	6.43	6.64667	7.48	5.23	2.64	5.11667	5.83	6.09	2.58	4.83333	6.79	5.02	5.06	5.62333	5.83	2.01	4.59	4.14333
TraesCS5D02G284800	4.92	5	4.8	4.90667	4.13	3.71	4.25	4.03	3.22	2.44	5.46	3.70667	2.81	3.51	3.74	3.35333	5.25	2.7	4.48	4.14333
TraesCS6D02G344500	4.97	5.32	5.17	5.15333	5.52	5.39	3.71	4.87333	4.35	3.91	2.24	3.5	5.37	5.8	4.86	5.34333	6.08	2.5	3.79	4.12333
TraesCS6D02G362500	5.75	5.16	5.23	5.38	4.96	5.69	4.03	4.89333	4.17	3.98	3.94	4.03	4.81	4.85	4.72	4.79333	5.69	2.33	4.28	4.1
TraesCS5A02G401700	5.28	4.62	4.9	4.93333	4.72	4.73	5.13	4.86	3.84	3.83	3.91	3.86	4.68	4.63	5.05	4.78667	3.66	3.31	5.32	4.09667
TraesCS5D02G509800	6.23	6.28	6.2	6.23667	7.06	5.1	3.68	5.28	5.33	5.77	4.13	5.07667	5.77	5.92	4.95	5.54667	4.8	2.92	4.52	4.08
TraesCS6D02G390200	4.36	4.46	4.49	4.43667	4.16	4.39	3.87	4.14	3.1	3.71	4.37	3.72667	4.32	4.64	4.85	4.60333	4.83	2.56	4.8	4.06333
TraesCS5D02G510000	5.33	4.75	4.62	4.9	5.02	4.62	3.75	4.46333	4.84	4.28	3.88	4.33333	5.12	4.43	4.68	4.74333	4.89	2.74	4.51	4.04667
TraesCS3D02G543100	5.81	4.86	5.03	5.23333	4.67	4.59	3.92	4.39333	4.79	3.6	3.98	4.12333	4.93	4.69	5.27	4.96333	5.99	2.19	3.95	4.04333
TraesCS6D02G358100	3.77	3.86	3.71	3.78	2.55	3.08	2.73	2.78667	3.17	2.53	4.08	3.26	2.58	2.7	4.43	3.23667	4.43	1.48	6.22	4.04333
TraesCS5D02G540800	4.61	4.26	4.52	4.46333	3.99	4.11	3.83	3.97667	3.02	3	3.59	3.20333	3.87	4.46	5.12	4.48333	4.64	2.44	5.04	4.04
TraesCS1D02G252500	4.12	3.85	3.84	3.93667	3.98	4.22	3.9	4.03333	3.38	3.11	3.06	3.18333	4.05	4.26	4.77	4.36	4.5	2.63	4.99	4.04
TraesCS5A02G394900	7.28	7	7.02	7.1	6.83	7.81	5.74	6.79333	5.7	5.77	5.21	5.56	5.66	7.93	5.41	6.33333	8.07	3.54	0.5	4.03667
TraesCS5D02G542300	5.87	5.3	5.29	5.48667	6.01	4.87	3	4.62667	4.76	4.55	2.58	3.96333	5.86	5.08	5.16	5.36667	5.5	2	4.6	4.03333
TraesCS6B02G060700	3.82	3.85	3.9	3.85667	4.29	5.01	4.27	4.52333	3.98	4.47	4.42	4.29	4.66	4.62	4.66	4.64667	4.86	3.29	3.85	4
TraesCS5D02G496000	3.69	4	3.81	3.83333	3.96	3.54	2.24	3.24667	2.85	3.68	4.56	3.69667	4	3.56	3.98	3.84667	4.58	2.77	4.6	3.98333
TraesCS5D02G558700	0.04	0.3	0.12	0.153333	0.02	0.27	0	0.0966667	0.32	0.04	1.84	0.733333	0.02	0.31	0.04	0.123333	0.02	5.28	6.65	3.98333
TraesCS1D02G001000	0	1.46	0	0.486667	0	0	0	0	0	0	0	0	0	0	0.08	0.0266667	0	10.48	1.47	3.98333
TraesCS6D02G383500	5.44	5.32	5.31	5.35667	6.04	5.08	3.5	4.87333	4.42	4.64	3.12	4.06	5.76	5.01	5.1	5.29	5.11	2.02	4.78	3.97
TraesCS5D02G282400	5.42	5.39	5.5	5.43667	5.08	5.01	4.38	4.82333	4.37	4.19	4.19	4.25	5.14	5.47	5.07	5.22667	4.98	2.22	4.69	3.96333
TraesCS6D02G354100	5.62	5.12	5.2	5.31333	3.27	5.16	1.5	3.31	2.81	3.75	3.36	3.30667	3.86	2.84	1.63	2.77667	5.35	2.1	4.41	3.95333
TraesCS1D02G250500	3.95	4.29	4.13	4.12333	4.23	4.16	4.06	4.15	3.31	3.74	4.22	3.75667	4.88	4.48	5	4.78667	4.59	2.04	5.2	3.94333
TraesCS5D02G495900	2.83	4.9	4.61	4.11333	5.51	3.51	1.1	3.37333	1.74	2.26	0.23	1.41	3.78	2.44	0.52	2.24667	3.03	3.04	5.74	3.93667
TraesCS5D02G512300	5.13	4.48	4.62	4.74333	5.47	4.85	4.37	4.89667	4.04	3.72	2.93	3.56333	5.51	5.75	5.08	5.44667	5.21	2.68	3.89	3.92667
TraesCS5D02G565200	4.98	4.46	4.61	4.68333	4.74	4.41	4.18	4.44333	3.5	3.41	3.4	3.43667	4.89	4.71	4.78	4.79333	4.43	2.92	4.42	3.92333
TraesCS6D02G381300	5.52	5.57	5.61	5.56667	5.21	5.22	5.16	5.19667	3.74	4.19	5.04	4.32333	4.99	5.3	5.15	5.14667	4.76	2.59	4.36	3.90333
TraesCS5D02G477600	4.64	4.41	4.51	4.52	5.21	4.29	3.81	4.43667	3.59	3.83	3.31	3.57667	5.23	4.75	4.68	4.88667	4.71	2.3	4.68	3.89667
TraesCS5D02G530300	4.57	4.4	4.56	4.51	4.83	4.12	3.92	4.29	3.81	3.77	3.85	3.81	5.15	4.61	4.72	4.82667	4.56	2.42	4.7	3.89333
TraesCS6D02G369100	3.37	3.23	3.26	3.28667	3.07	3.54	3.96	3.52333	2.62	2.64	3.55	2.93667	3.23	3.89	3.84	3.65333	4.81	2.16	4.67	3.88
TraesCS5D02G470400	2.95	2.3	2.45	2.56667	3.15	4.45	3.22	3.60667	3.96	3.3	3.19	3.48333	4.57	4.28	4.37	4.40667	5.32	2.64	3.66	3.87333
TraesCS6D02G368800	5.74	5.86	6	5.86667	5.47	5.42	5.01	5.3	4.74	4.75	5.24	4.91	5.05	5.21	5.34	5.2	5.25	2.16	4.19	3.86667
TraesCS6D02G383800	3.8	4.01	4.2	4.00333	3.5	3.84	3.93	3.75667	2.69	3.83	5.24	3.92	3.76	3.73	4.61	4.03333	4.34	2.16	5.09	3.86333
TraesCS6D02G364400	3.43	2.06	2.17	2.55333	0.82	1.69	2.19	1.56667	3.28	2.51	3.12	2.97	2.27	2.93	4.75	3.31667	5.73	2.77	3.08	3.86
TraesCS5D02G481300	6.74	6.65	6.66	6.68333	6.8	7.7	8.49	7.66333	6.6	6.47	4.93	6	6.13	7.3	6.76	6.73	7.29	2.43	1.84	3.85333
TraesCS5A02G398900	4.52	5.26	5.23	5.00333	4.23	4.66	3.25	4.04667	3.39	5.31	6.13	4.94333	4.55	4.43	3.76	4.24667	5.87	2.25	3.44	3.85333
TraesCS6D02G359000	4.12	3.93	3.93	3.99333	4.29	4.26	4.22	4.25667	3.18	3.16	3.52	3.28667	4.69	4.77	4.7	4.72	4.25	1.9	5.39	3.84667
TraesCS7A02G132700	3.9	3.9	3.84	3.88	3.71	3.73	3.65	3.69667	3.38	3.42	4.45	3.75	2.93	3.39	4.36	3.56	4.14	2.04	5.36	3.84667
TraesCS6D02G374400	5.9	5.4	5.45	5.58333	5.77	5.46	4.85	5.36	5.14	4.82	4.05	4.67	5.56	5.77	5.73	5.68667	5.49	2.13	3.88	3.83333
TraesCS6B02G053000	3.86	3.73	3.81	3.8	4.48	3.66	2.7	3.61333	3.04	3.56	2.48	3.02667	4.16	3.55	3.81	3.84	3.79	1.89	5.82	3.83333
TraesCS5D02G479200	0	0.05	0.27	0.106667	0.54	0	0	0.18	0	0	0.03	0.01	0.03	2.35	0	0.793333	0.07	0.02	11.36	3.81667
TraesCS3D02G535900	5.19	5.43	5.25	5.29	5.36	5.43	4.51	5.1	5.12	5.18	4.32	4.87333	5.98	5.4	5.55	5.64333	5.6	2	3.8	3.8
TraesCS3D02G527700	5	4.93	4.76	4.89667	5.73	4.95	4.15	4.94333	4.15	4.11	3.83	4.03	5.33	5.05	4.67	5.01667	4.78	2.28	4.33	3.79667
TraesCS6D02G388500	5.8	5.34	5.35	5.49667	4.69	5.19	4.63	4.83667	3.91	3.64	4.37	3.97333	4.47	4.87	4.42	4.58667	5.13	2.82	3.42	3.79
TraesCS6D02G376400	0.32	0.43	0.36	0.37	2.45	2.52	2.99	2.65333	0.59	1.82	1.08	1.16333	5.83	5.07	5.71	5.53667	5.77	2.46	3.12	3.78333
TraesCS5D02G477500	5.59	5.76	5.68	5.67667	3.59	5.36	5.02	4.65667	3.57	5.78	7.18	5.51	2.76	3.78	4.35	3.63	5.61	1.96	3.76	3.77667
TraesCS6D02G376500	0.28	1.33	1.28	0.963333	2.14	2.73	4.05	2.97333	0.63	1.56	2.65	1.61333	5.88	5.35	6.22	5.81667	6.12	2.35	2.84	3.77
TraesCS5D02G480800	4.35	4.51	4.75	4.53667	4.8	4.77	3.76	4.44333	2.94	3.84	4.35	3.71	5.29	5.48	4.26	5.01	4.8	2.82	3.69	3.77
TraesCS5D02G529200	0.04	0.09	0.08	0.07	0.09	0	0	0.03	0	0	0	0	0.01	0.69	0.45	0.383333	0.08	3.26	7.89	3.74333
TraesCS5D02G544000	4.94	4.57	4.69	4.73333	5.49	4.72	3.94	4.71667	4.27	4.2	3.06	3.84333	5.73	4.97	4.74	5.14667	4.84	2.08	4.23	3.71667
TraesCS5D02G563900	5.46	5.39	5.48	5.44333	4.85	5.41	5.34	5.2	4.29	4.35	5.82	4.82	4.02	4.67	5.35	4.68	5.06	1.91	4.18	3.71667
TraesCS5A02G402300	3.97	2.95	2.94	3.28667	3.28	3.61	5.26	4.05	4.18	2.53	4.89	3.86667	3.03	3.14	3.93	3.36667	3.99	1.78	5.38	3.71667
TraesCS5D02G283300	4.31	4.86	4.68	4.61667	5.25	5.03	3.54	4.60667	4.85	4.38	3.48	4.23667	5.22	4.69	4.78	4.89667	4.87	1.57	4.69	3.71
TraesCS1D02G004900	3.73	3.53	3.68	3.64667	4.19	3.39	2.77	3.45	2.63	2.94	2.87	2.81333	4.46	4.35	4.43	4.41333	4.19	2.47	4.46	3.70667
TraesCS5D02G503400	5.14	3.21	3.36	3.90333	2.66	4.26	1.74	2.88667	1.25	2.05	4.08	2.46	3.15	3.95	3.04	3.38	4.81	2.6	3.69	3.7
TraesCS5D02G508800	4.34	4.56	4.6	4.5	5.21	4.32	2.74	4.09	3.32	3.44	1.71	2.82333	6	5.13	4.36	5.16333	4	2.87	4.22	3.69667
TraesCS1A02G033288	0	1.13	0	0.376667	0	0	0	0	0	0	0	0	0	0	0	0	0	9.96	1.12	3.69333
TraesCS6B02G052900	3.74	4.25	4.04	4.01	4.4	4.19	3.53	4.04	2.79	2.94	2.4	2.71	4.56	4.58	4.76	4.63333	4.46	2.47	4.14	3.69
TraesCS1D02G003900	4.33	4.7	4.53	4.52	4.03	4.38	4.38	4.26333	3.89	3.83	5.2	4.30667	3.8	4.16	4.31	4.09	4.32	1.87	4.79	3.66
TraesCS1D02G002500	4.23	3.77	3.85	3.95	3.97	3.6	3.58	3.71667	2.77	2.89	2.93	2.86333	4.38	4.1	4.1	4.19333	4.74	2.46	3.7	3.63333
TraesCS5A02G393800	5.08	5.05	4.85	4.99333	4.95	4.83	3.35	4.37667	4.23	3.95	4.29	4.15667	4.88	4.82	4.47	4.72333	4.57	1.69	4.61	3.62333
TraesCS5D02G504100	5.89	5.95	5.97	5.93667	5.12	5.92	6.55	5.86333	4.74	4.94	6.42	5.36667	4.8	5.85	6.19	5.61333	5.03	2.44	3.39	3.62
TraesCS4A02G023500	3.5	3.1	3.34	3.31333	4.36	3.75	3.22	3.77667	2.72	2.88	2.61	2.73667	4.63	4.26	4.38	4.42333	4.11	2.67	3.99	3.59
TraesCS5D02G531800	4.66	4.24	4.49	4.46333	3.88	4.38	3.89	4.05	3.59	3.58	4.33	3.83333	3.89	4.15	4.62	4.22	4.83	2.06	3.88	3.59
TraesCS6D02G389400	8.35	9.35	9.17	8.95667	6.95	6.87	5.21	6.34333	6.26	6.15	7.69	6.7	3.16	5.14	7.1	5.13333	3.62	1.96	5.18	3.58667
TraesCS5D02G521800	4.99	4.78	4.78	4.85	5.3	4.99	4.59	4.96	4.37	3.95	3.34	3.88667	5.17	5.19	4.57	4.97667	4.61	2.33	3.82	3.58667
TraesCS5D02G511200	4.14	3.62	3.53	3.76333	3.45	2.82	1.64	2.63667	3.09	2.42	2.34	2.61667	3.69	3.96	2.59	3.41333	2.84	2.51	5.39	3.58
TraesCS5A02G401500	3.86	3.28	3.53	3.55667	4.32	3.79	2.97	3.69333	3.8	3.51	2.75	3.35333	4.68	3.82	3.75	4.08333	4	3.3	3.43	3.57667
TraesCS3D02G536300	7.6	9.06	9.02	8.56	9.27	10.58	9.89	9.91333	6.4	8.48	9.65	8.17667	7.05	8.76	9.56	8.45667	3.85	3.97	2.84	3.55333
TraesCS5D02G486100	3.31	3.22	3.2	3.24333	4.1	3.03	1.86	2.99667	2.22	2.52	1.4	2.04667	4.35	4.17	3.22	3.91333	3.52	1.65	5.48	3.55
TraesCS5A02G400100	5.19	5.07	5.18	5.14667	5.17	4.89	4.7	4.92	4.5	4.39	4.46	4.45	4.48	4.58	4.5	4.52	4.39	2.87	3.32	3.52667
TraesCS5D02G494800	2.37	2.56	2.27	2.4	3.97	3.8	2.95	3.57333	2.32	2.27	0.16	1.58333	4.98	5.89	4.25	5.04	5.51	1.68	3.37	3.52
TraesCS5A02G402700	5.05	4.59	4.69	4.77667	5.07	4.69	3.68	4.48	4.2	3.55	3.4	3.71667	4.84	5.08	4.49	4.80333	4.67	1.8	4.09	3.52
TraesCS6D02G374300	3.55	2.97	3.45	3.32333	3.01	3.51	3.94	3.48667	2.65	2.44	2.08	2.39	3	3.62	3.79	3.47	4.02	2.33	4.2	3.51667
TraesCS4A02G019100	2.96	2.94	3.07	2.99	4.28	5.78	7.62	5.89333	7.32	7.86	8.01	7.73	3.53	5.12	5.65	4.76667	5.3	1.42	3.81	3.51
TraesCS6D02G365200	4.3	4.44	4.69	4.47667	4.94	4.87	2.7	4.17	3.27	3.05	3.08	3.13333	5.05	4.65	3.41	4.37	4.99	4.29	1.24	3.50667
TraesCS5D02G565700	4.87	5.2	5.05	5.04	5.29	5.22	4.9	5.13667	4.23	3.95	4.18	4.12	5.39	5.74	5.08	5.40333	5.26	1.82	3.42	3.5
TraesCS5D02G479900	4.04	3.57	3.6	3.73667	4.19	4.09	3.58	3.95333	3.54	3.73	3.55	3.60667	4.52	3.84	4.47	4.27667	4.54	1.81	4.15	3.5
TraesCS5D02G501200	5.33	4.93	4.85	5.03667	5.31	4.61	3.55	4.49	4.4	4.16	3.04	3.86667	5.25	4.75	4.83	4.94333	4.83	1.91	3.72	3.48667
TraesCS6D02G380100	3.95	5.2	5.35	4.83333	4.43	6.33	7.64	6.13333	3.43	5.33	5.87	4.87667	3.88	4.05	6.32	4.75	5.37	2.35	2.73	3.48333
TraesCS1D02G002600	5.25	4.33	4.57	4.71667	4.15	5.08	4.66	4.63	4.27	4.59	4.76	4.54	4.54	4.82	4.36	4.57333	5.16	2.37	2.91	3.48
TraesCS4A02G023200	3.68	3.58	3.63	3.63	3.91	4.07	3.91	3.96333	2.75	3.09	3.8	3.21333	4.02	4.31	4.72	4.35	4.29	2.02	4.06	3.45667
TraesCS6D02G344200	4.57	4.55	4.61	4.57667	5.49	6.16	6.49	6.04667	6.13	5.36	5.44	5.64333	4.73	5.77	6.34	5.61333	6.02	1.85	2.44	3.43667
TraesCS6D02G394800	3.51	2.97	2.94	3.14	3.31	3.92	2.3	3.17667	2.49	3.49	4.04	3.34	4.28	4	3.51	3.93	4.73	2.11	3.47	3.43667
TraesCS5D02G498600	5.19	5.38	5.43	5.33333	4.77	5.25	4.53	4.85	4.08	3.89	4.02	3.99667	4.05	5.32	4.86	4.74333	5.19	1.99	3.12	3.43333
TraesCS6D02G369300	6.31	5.93	5.93	6.05667	4.64	5.92	3.56	4.70667	4.11	5.26	5.99	5.12	4.69	4.79	4.4	4.62667	5.37	2.82	2.08	3.42333
TraesCS5D02G481700	3.34	4	3.91	3.75	3.28	3.42	3.34	3.34667	2.72	3.07	3.7	3.16333	4.08	3.94	3.97	3.99667	4.33	1.71	4.22	3.42
TraesCS1A02G025100	4.29	4.2	4.18	4.22333	4.52	3.85	3.05	3.80667	3.76	3.75	2.82	3.44333	4.44	3.52	4.02	3.99333	3.95	1.5	4.78	3.41
TraesCS5D02G562500	3.83	3.75	3.75	3.77667	3.68	3.88	4.02	3.86	3.95	3.36	3.81	3.70667	3.44	4.32	4.29	4.01667	4.8	1.9	3.49	3.39667
TraesCS1A02G033600	2.9	2.85	3.07	2.94	4.41	4.05	4.94	4.46667	6.64	4.57	1.73	4.31333	4.05	4.15	3.5	3.9	4.24	5.53	0.42	3.39667
TraesCS7D02G143200	4.81	3.32	3.33	3.82	2.19	2.61	3.73	2.84333	3.05	1.41	2.3	2.25333	0.89	2.31	3.9	2.36667	4.16	1.94	4.08	3.39333
TraesCS3D02G539300	6.57	5.56	5.86	5.99667	6.37	5.17	0.17	3.90333	5.63	4.64	0.27	3.51333	7.95	5.49	5.91	6.45	6.67	3.18	0.32	3.39
TraesCS1A02G033000	3.25	3.02	2.94	3.07	3.09	3.47	3.06	3.20667	2.83	3.02	2.85	2.9	3.94	3.89	4.01	3.94667	3.82	2.2	4.03	3.35
TraesCS5D02G537300	3.56	3.35	3.31	3.40667	3.73	3.34	2.38	3.15	2.13	2.08	1.72	1.97667	3.93	3.82	3.61	3.78667	3.59	2.4	4.05	3.34667
TraesCS7D02G139800	3.72	3.23	3.55	3.5	3.04	3.23	4.02	3.43	2.49	2.4	2.72	2.53667	3.25	3.35	3.93	3.51	3.41	1.91	4.72	3.34667
TraesCS5D02G551800	3.9	3.68	3.74	3.77333	3.36	3.12	2.74	3.07333	3.35	2.62	2.45	2.80667	3.54	3.58	3.78	3.63333	3.71	3.66	2.64	3.33667
TraesCS6D02G359900	5.12	4.69	4.89	4.9	4.99	5.36	4.84	5.06333	3.8	3.57	3.47	3.61333	4.16	5.36	4.22	4.58	4.03	2.54	3.42	3.33
TraesCS4A02G025200	2.92	2.57	2.79	2.76	3.51	3.42	4.36	3.76333	5.52	5.17	4.75	5.14667	3.26	3.51	3.89	3.55333	3.84	1.18	4.96	3.32667
TraesCS3D02G539100	3.26	2.84	2.9	3	2.8	1.64	4.51	2.98333	1.27	0.84	0.07	0.726667	0.42	4.05	4.22	2.89667	4.76	5.08	0.12	3.32
TraesCS5D02G557200	3.81	4.27	4.2	4.09333	4.27	3.82	3.3	3.79667	3.08	3.09	3.75	3.30667	3.78	4.34	4.05	4.05667	4.32	2.07	3.55	3.31333
TraesCS5D02G518700	4.06	3.79	3.71	3.85333	4.27	4.24	2.37	3.62667	2.64	3.32	3.5	3.15333	4.93	4.39	3.52	4.28	4.75	1.27	3.9	3.30667
TraesCS5D02G542400	3.62	3.71	3.61	3.64667	4.03	4.62	5.26	4.63667	5.49	5.08	5.71	5.42667	3.83	3.85	4.54	4.07333	4.72	1.15	4.01	3.29333
TraesCS1D02G000582	0	0.62	0	0.206667	0	0	0	0	0	0	0	0	0	0	0	0	0	9.43	0.44	3.29
TraesCS7D02G146400	2.12	2.15	1.99	2.08667	2.53	2.54	1.88	2.31667	0.72	1.66	4.48	2.28667	3.55	3.3	3.66	3.50333	3.63	1.21	4.94	3.26
TraesCS5D02G505900	4.6	4.31	4.35	4.42	4.18	3.77	3.35	3.76667	2.73	2.81	2.72	2.75333	3.88	4.39	4.02	4.09667	4.09	1.83	3.79	3.23667
TraesCS1A02G027200	3.75	3.05	3.37	3.39	4.09	4.28	3.6	3.99	2.93	2.87	2.88	2.89333	4.04	3.78	4.09	3.97	3.62	1.67	4.37	3.22
TraesCS6D02G385700	4.53	4.24	4.52	4.43	3.52	3.7	3.81	3.67667	2.45	2.61	3.17	2.74333	3.49	3.66	4.17	3.77333	4.17	2.09	3.39	3.21667
TraesCS5D02G514800	3.48	3.25	3.36	3.36333	3.5	3.31	3.1	3.30333	2.86	2.92	3.16	2.98	4.41	4.03	4.3	4.24667	4.04	1.9	3.68	3.20667
TraesCS5D02G535800	3.62	3.38	3.55	3.51667	4.26	3.37	3.13	3.58667	3.11	3.3	2.76	3.05667	4.71	4.02	3.75	4.16	3.69	1.98	3.94	3.20333
TraesCS5D02G481600	3.11	3.38	3.53	3.34	4.48	3.8	3.14	3.80667	3.25	3.73	3.78	3.58667	4.2	3.95	3.43	3.86	3.11	2.91	3.59	3.20333
TraesCS5A02G401600	4.49	4.19	4.25	4.31	4.09	4.09	3.02	3.73333	3.21	3.44	3.28	3.31	1.55	1.9	4.43	2.62667	4.52	1.44	3.64	3.2
TraesCS1A02G029300	5.57	4.18	4.12	4.62333	3.78	4.27	1.75	3.26667	3.84	4.96	5.99	4.93	5.48	5.52	3.63	4.87667	6.43	1.48	1.68	3.19667
TraesCS5D02G516600	4.62	4.56	4.55	4.57667	3.71	4.5	3.72	3.97667	2.81	3.48	4.15	3.48	3.77	4.12	3.64	3.84333	3.58	2.72	3.26	3.18667
TraesCS1A02G033100	3.01	3.33	3.25	3.19667	3.19	3.45	3.23	3.29	2.27	2.3	2.78	2.45	4.21	3.82	4.06	4.03	3.81	1.44	4.25	3.16667
TraesCS1D02G252900	3.07	3.58	3.46	3.37	1.83	3.61	4.54	3.32667	1.36	4.32	6.06	3.91333	1.77	3.24	3.77	2.92667	2.27	5.35	1.85	3.15667
TraesCS5D02G515700	3.3	2.94	2.98	3.07333	2.31	2.74	2.22	2.42333	2.38	1.56	3.06	2.33333	2.1	2.28	3.26	2.54667	3.23	1.44	4.8	3.15667
TraesCS6D02G389600	2.57	2.85	2.74	2.72	3.64	3.46	2.66	3.25333	2.2	2.45	2.3	2.31667	4.03	4.16	4.43	4.20667	2.59	1.78	5.09	3.15333
TraesCS5D02G536500	5.2	4.88	4.9	4.99333	2.22	5.02	1.28	2.84	2.02	4.36	5.27	3.88333	1.72	2.6	4.28	2.86667	5.5	2.37	1.57	3.14667
TraesCS5D02G472400	3.16	3.84	3.63	3.54333	3.78	4.03	4.07	3.96	4.15	4.52	4.99	4.55333	4	4.07	4.86	4.31	4.23	0.93	4.27	3.14333
TraesCS5D02G284000	5.1	4.54	4.41	4.68333	5.52	4.88	0.78	3.72667	3.76	3.61	0.39	2.58667	5.5	4.91	3.6	4.67	4.34	2.55	2.53	3.14
TraesCS6D02G360500	4.12	3.44	3.99	3.85	3.99	3.83	4.04	3.95333	3.19	3.12	3.25	3.18667	4.5	4.3	4.27	4.35667	4.12	2.24	3.03	3.13
TraesCS5D02G553300	3.24	3.22	3.38	3.28	3.52	3.17	3.49	3.39333	2.45	2.54	2.48	2.49	3.04	3.17	3.29	3.16667	3.04	2.01	4.34	3.13
TraesCS5D02G486300	1.57	1.56	1.65	1.59333	3.35	3.68	3.71	3.58	0.81	4.09	4.27	3.05667	5.21	5.2	5.3	5.23667	5.75	2.79	0.79	3.11
TraesCS5D02G480100	3.91	4.46	4.3	4.22333	4.27	4.12	3.61	4	3.51	4.01	4.28	3.93333	4.75	4.72	4.4	4.62333	4.5	1.34	3.49	3.11
TraesCS4A02G021300	2.32	2.08	1.76	2.05333	5.23	4.59	0.19	3.33667	4.37	3.75	0.37	2.83	6.27	6.19	3.87	5.44333	4.42	2.09	2.81	3.10667
TraesCS5D02G507000	3.56	3.44	3.48	3.49333	2.65	3.11	2.83	2.86333	2.25	2.08	2.8	2.37667	2.74	2.7	3.48	2.97333	3.07	1.11	5.14	3.10667
TraesCS4A02G022000	3.28	3.13	3.22	3.21	3.79	3.59	3.07	3.48333	2.69	2.97	2.83	2.83	3.83	4	4.3	4.04333	4.08	1.74	3.48	3.1
TraesCS3D02G533800	4.2	4.15	4.02	4.12333	4.27	3.97	3.19	3.81	3.6	3.03	2.99	3.20667	4.01	3.92	3.77	3.9	4.07	1.52	3.71	3.1
TraesCS5D02G489900	3.36	3.54	3.43	3.44333	3.36	2.68	3.14	3.06	2.43	2.39	2.47	2.43	3.14	2.64	4.13	3.30333	3.25	1.57	4.47	3.09667
TraesCS3D02G543400	3.15	3.2	3.38	3.24333	2.7	2.73	3.07	2.83333	2.16	2.36	2.68	2.4	2.75	3.12	3.37	3.08	3.03	2.36	3.87	3.08667
TraesCS5D02G517600	3.67	3.44	3.44	3.51667	4.05	4.12	3.75	3.97333	3.18	3.39	3.87	3.48	3.66	3.94	4.36	3.98667	3.65	1.45	4.15	3.08333
TraesCS6D02G393200	4.35	3.53	3.35	3.74333	2.93	3.01	2.73	2.89	3.44	2.05	3.54	3.01	2.6	2.75	3.62	2.99	3.58	1.76	3.9	3.08
TraesCS5D02G553500	3.25	2.97	3.06	3.09333	3.41	2.73	2.82	2.98667	2.47	3.14	3.08	2.89667	3.28	2.71	6.41	4.13333	3.26	1.12	4.84	3.07333
TraesCS5A02G395500	3.28	3.68	3.61	3.52333	3.5	2.93	3.38	3.27	2.51	2.74	2.75	2.66667	3.8	3.55	3.55	3.63333	3.56	1.4	4.25	3.07
TraesCS6D02G376900	5.36	5.6	5.65	5.53667	5.12	4.59	3.09	4.26667	3.35	3.28	2.18	2.93667	4.46	5.5	3.23	4.39667	3.9	1.92	3.37	3.06333
TraesCS1D02G248900	3.14	2.54	2.73	2.80333	3.11	2.93	2.51	2.85	2.43	2.27	2.38	2.36	3.91	3.41	3.66	3.66	3.47	1.69	3.97	3.04333
TraesCS5A02G398300	4.48	4.01	4.1	4.19667	4.34	3.08	2.77	3.39667	4.83	3.5	0.95	3.09333	4.02	3.06	3.57	3.55	3.85	1.28	4	3.04333
TraesCS5D02G562200	3.08	3.05	3.12	3.08333	3.6	2.93	2.75	3.09333	2.81	2.89	2.77	2.82333	4.04	3.74	3.88	3.88667	3.16	1.81	4.14	3.03667
TraesCS5D02G513200	1.92	1.97	1.76	1.88333	0.65	1.47	1.66	1.26	1.36	1.09	1.92	1.45667	2.45	3.08	3.8	3.11	4.12	1.99	2.99	3.03333
TraesCS5D02G516000	3.7	3.44	3.47	3.53667	3.74	3.61	3.03	3.46	2.63	2.47	2.9	2.66667	3.31	3.48	3.49	3.42667	3.36	1.71	4.02	3.03
TraesCS6D02G350800	3.07	3.32	3.37	3.25333	2.56	3.32	3.46	3.11333	3.11	3.22	3.89	3.40667	2.42	3.15	4.13	3.23333	3.83	1.51	3.74	3.02667
TraesCS5D02G554100	6.25	5.6	5.82	5.89	5.88	6.31	5.61	5.93333	5.11	4.8	4.33	4.74667	5.33	6.33	4.82	5.49333	5.73	1.67	1.67	3.02333
TraesCS6D02G356400	3.51	3.35	3.51	3.45667	3.78	3.01	2.49	3.09333	2.83	3	1.81	2.54667	3.81	3.05	3.43	3.43	3.18	1.21	4.68	3.02333
TraesCS5D02G564700	4.3	4.21	4.06	4.19	3.9	3.91	3.7	3.83667	5.02	3.66	3.46	4.04667	3.51	3.8	4.19	3.83333	4.32	1.6	3.12	3.01333
TraesCS5D02G555000	4.74	4.33	4.42	4.49667	4.86	4.23	3.39	4.16	3.97	3.62	2.57	3.38667	4.65	4.13	4.31	4.36333	4.15	1.28	3.56	2.99667
TraesCS6D02G357400	4.17	3.84	3.8	3.93667	4.45	4.06	3.17	3.89333	2.96	2.88	2.42	2.75333	4.24	4.97	3.95	4.38667	4.03	1.3	3.65	2.99333
TraesCS5D02G473800	0.21	0.08	0.01	0.1	0.94	0.73	0	0.556667	2.28	0.12	0.03	0.81	3.97	6.93	5.52	5.47333	7.65	1.31	0	2.98667
TraesCS6D02G360400	3.44	3.49	3.31	3.41333	3.59	3.71	2.76	3.35333	2.49	2.93	2.86	2.76	3.2	2.99	3.58	3.25667	2.98	1.44	4.54	2.98667
TraesCS5D02G471200	0.39	0.48	0.46	0.443333	3.8	2.98	2.68	3.15333	1.5	2.57	2.36	2.14333	4.57	3.93	4.38	4.29333	4.15	1.35	3.45	2.98333
TraesCS6D02G387100	4.6	4.5	4.52	4.54	4.83	3.95	2.96	3.91333	3.58	3.63	2.76	3.32333	4.38	3.48	4.19	4.01667	3.95	1.46	3.54	2.98333
TraesCS7A02G133500	1.89	1.47	1.42	1.59333	1.28	1.08	2.17	1.51	2.54	1.43	0.75	1.57333	1.52	1.77	3.42	2.23667	3.31	2.09	3.55	2.98333
TraesCS5D02G280400	5.62	5.59	5.54	5.58333	5.47	6.47	6.87	6.27	5.05	4.4	3.22	4.22333	3.91	6.13	5.27	5.10333	4.9	2.08	1.94	2.97333
TraesCS5D02G498300	6.76	4.17	4.21	5.04667	4.34	3.64	3.35	3.77667	4.33	2.49	4.37	3.73	2.14	2.91	4.45	3.16667	5.74	1.2	1.98	2.97333
TraesCS3D02G534000	5.25	4.78	4.66	4.89667	5.25	4.72	2.77	4.24667	4.32	3.75	2.72	3.59667	4.89	5.5	4.14	4.84333	5.55	1.35	1.99	2.96333
TraesCS5A02G399700	2.45	2.27	2.21	2.31	3.98	4.08	0.39	2.81667	4.02	3.12	0.5	2.54667	5.6	5.22	3.64	4.82	5.76	0.9	2.23	2.96333
TraesCS1D02G252100	2.58	2.11	2.25	2.31333	3.32	4.12	5.19	4.21	5.24	4.77	5.15	5.05333	2.91	3.01	3.94	3.28667	3.73	1.56	3.6	2.96333
TraesCS6D02G390800	3.11	3.07	3.27	3.15	3.83	3.52	3.18	3.51	2.68	3.04	1.87	2.53	4.48	4.04	4.28	4.26667	3.56	1.4	3.9	2.95333
TraesCS6D02G352400	3.9	3.66	3.86	3.80667	3.88	3.12	2.45	3.15	3	2.93	1.98	2.63667	3.76	3.25	3.34	3.45	3.13	1.28	4.45	2.95333
TraesCS5D02G500900	4.69	4.3	3.36	4.11667	4.66	4.76	3.27	4.23	4.27	3.45	3.57	3.76333	4.7	4.4	4.49	4.53	5.06	0.28	3.49	2.94333
TraesCS5D02G283100	4.28	3.39	3.64	3.77	4.14	3.39	2.52	3.35	2.84	2.57	1.76	2.39	4.24	3.95	3.82	4.00333	3.99	1.29	3.54	2.94
TraesCS5D02G499100	5.05	4.14	4.16	4.45	5.43	5.83	0.67	3.97667	3.28	3.58	0.3	2.38667	7.05	5.64	3.45	5.38	7.19	0.79	0.83	2.93667
TraesCS3D02G530700	4.6	4.03	4.01	4.21333	4.38	3.95	3.17	3.83333	2.95	2.74	2.06	2.58333	4.87	4.32	4.89	4.69333	4.61	1.19	2.94	2.91333
TraesCS6D02G381700	3.53	3.47	3.64	3.54667	4.2	4.07	3.56	3.94333	3.08	3.06	2.63	2.92333	4.21	4.23	4.29	4.24333	3.61	1.42	3.7	2.91
TraesCS5D02G509100	3.97	3.98	3.85	3.93333	4.43	3.25	2.54	3.40667	3.71	3.44	2.25	3.13333	4.13	3.21	4.1	3.81333	3.73	1.14	3.86	2.91
TraesCS3D02G530200	3.61	3.43	3.53	3.52333	3.52	3.29	3.52	3.44333	3.33	3.17	3.18	3.22667	3.25	3.72	4.06	3.67667	3.43	1.46	3.83	2.90667
TraesCS5D02G531400	0.01	0.05	0.04	0.0333333	4.59	3.78	0.17	2.84667	5.08	3.46	0.2	2.91333	6.02	6.51	2.63	5.05333	7.37	0.99	0.35	2.90333
TraesCS5D02G485900	4.38	4.2	4.29	4.29	4.36	5	3.63	4.33	3.1	3.3	0.47	2.29	4.74	4.93	4.01	4.56	5.77	1.37	1.56	2.9
TraesCS5A02G403700	3.99	4.6	4.12	4.23667	4.59	4.78	4.05	4.47333	4.49	4.41	5.49	4.79667	3.55	4.71	4.12	4.12667	4.34	2.4	1.95	2.89667
TraesCS5D02G493700	3.81	3.65	3.59	3.68333	3.75	3.43	2.79	3.32333	2.78	2.7	2.54	2.67333	3.82	3.84	3.8	3.82	3.86	1.25	3.58	2.89667
TraesCS5D02G508700	3.63	3.38	3.41	3.47333	4.28	2.82	1.83	2.97667	2.82	3.09	1.67	2.52667	3.84	2.97	3.31	3.37333	3.05	1.04	4.58	2.89
TraesCS5D02G518600	2.89	2.93	2.96	2.92667	3.13	3.28	2.62	3.01	2.32	2.73	3.24	2.76333	3.07	3.18	3.34	3.19667	2.84	1.23	4.6	2.89
TraesCS1A02G024000	2.01	2.95	3.07	2.67667	4.74	3.85	3.68	4.09	2.79	3.62	3.07	3.16	5.02	4.68	4.63	4.77667	4.63	1.98	2.05	2.88667
TraesCS5A02G403600	2	2.42	1.86	2.09333	3.37	3.97	2.1	3.14667	3.14	4.76	3.23	3.71	1.75	3.16	3.18	2.69667	3.08	1.87	3.71	2.88667
TraesCS5D02G496400	0.29	0.3	0.48	0.356667	6.17	7.13	9.16	7.48667	9.65	9.84	9.63	9.70667	5.69	7.07	6.88	6.54667	6.95	1.67	0	2.87333
TraesCS5D02G565300	4.07	3.96	3.8	3.94333	3.37	3.16	1.31	2.61333	3.57	2.57	0.78	2.30667	2.36	4.93	5.46	4.25	4.79	2.24	1.58	2.87
TraesCS6D02G376800	2.49	2.76	2.52	2.59	2.85	2.73	1.78	2.45333	2.08	2.39	2.59	2.35333	3.66	3.23	3.71	3.53333	3.37	1.7	3.54	2.87
TraesCS1D02G002400	3.96	3.39	3.45	3.6	4.78	2.87	0.39	2.68	2.46	2.85	0.51	1.94	5.2	3.21	3.41	3.94	3.38	2.62	2.56	2.85333
TraesCS4A02G021600	4.54	3.9	4.09	4.17667	5.08	3.41	2.02	3.50333	3.66	3.49	1.3	2.81667	4.3	3.27	3.54	3.70333	3.8	1.62	3.13	2.85
TraesCS6D02G363800	3.63	3.78	3.91	3.77333	3.65	3.35	2.96	3.32	2.66	3.1	3.47	3.07667	3.56	3.9	3.34	3.6	3.36	1.2	3.99	2.85
TraesCS5D02G524700	3.57	4.42	4.02	4.00333	3.9	4.06	3.72	3.89333	3.78	3.61	3.3	3.56333	4.06	4.08	4.33	4.15667	4.24	1.4	2.9	2.84667
TraesCS1D02G002200	1.99	1.6	1.97	1.85333	3.55	2.84	3.31	3.23333	2.62	2.3	1.92	2.28	4.22	4.14	3.25	3.87	3.68	2.28	2.57	2.84333
TraesCS5D02G482000	3.97	4.17	4.17	4.10333	3.2	4.03	5.21	4.14667	2.6	3.92	4.45	3.65667	3.34	3.21	3.97	3.50667	4.42	1.33	2.78	2.84333
TraesCS5D02G476800	0	0	0	0	0.09	0	0	0.03	0	0.08	0	0.0266667	2.16	6.16	5.14	4.48667	8.02	0.49	0	2.83667
TraesCS5D02G499900	0	0.02	0	0.00666667	0	0	0	0	0	0	0.02	0.00666667	0	0.05	0.1	0.05	1.23	2.82	4.45	2.83333
TraesCS5D02G510100	3.11	2.93	2.9	2.98	3.05	3.41	2.18	2.88	2.07	2.58	1.73	2.12667	3.55	3.6	3.32	3.49	4.11	1.61	2.77	2.83
TraesCS5D02G521400	0	0.01	0.06	0.0233333	0.02	0	0	0.00666667	0	0	0	0	0	0.06	0	0.02	0	3.45	5.03	2.82667
TraesCS1D02G249100	2.38	2.3	2.17	2.28333	4.74	5.13	5.85	5.24	5.8	5.44	6	5.74667	5.17	5.44	5.88	5.49667	4.73	1.65	2.09	2.82333
TraesCS3D02G543800	2.37	2.44	2.49	2.43333	3.26	2.33	2.22	2.60333	2.14	2.32	1.83	2.09667	4.04	3.73	4.02	3.93	3.55	2.42	2.49	2.82
TraesCS1A02G018900	2.85	2.31	2.56	2.57333	3.35	2.68	2.51	2.84667	2.53	2.25	2.43	2.40333	3.77	2.98	3.2	3.31667	2.96	1.79	3.71	2.82
TraesCS5D02G506000	3.28	3.98	3.97	3.74333	2.65	3.81	4.39	3.61667	2.5	3.32	4.89	3.57	2.29	2.92	3.67	2.96	3.11	2.04	3.31	2.82
TraesCS5D02G565100	2.53	2.38	2.38	2.43	2.18	2.61	0.97	1.92	1.02	2.04	3.83	2.29667	2.78	2.48	2.61	2.62333	3.49	0.26	4.71	2.82
TraesCS6D02G383200	2.83	2.76	2.72	2.77	2.8	3.02	2.2	2.67333	1.88	2.19	2.01	2.02667	2.63	2.25	3.18	2.68667	2.74	1.2	4.5	2.81333
TraesCS5D02G508900	2.93	2.83	2.85	2.87	3.28	2.67	2.34	2.76333	2.25	2.47	2.01	2.24333	3.53	2.99	3.07	3.19667	3.09	1.62	3.72	2.81
TraesCS5D02G471000	3.21	3.52	3.27	3.33333	3.19	2.68	2.74	2.87	2.99	3.07	3.23	3.09667	3.69	3.12	3.88	3.56333	3.15	1.49	3.77	2.80333
TraesCS1D02G003700	3.58	3.01	3.19	3.26	5.88	5.7	7.24	6.27333	8.7	7.23	6.67	7.53333	5.26	5.96	5.2	5.47333	6.2	1.7	0.48	2.79333
TraesCS5D02G479500	3.08	2.78	2.95	2.93667	3.3	3.02	2.79	3.03667	2.68	2.67	2.33	2.56	4.01	3.39	3.4	3.6	3.48	1.68	3.14	2.76667
TraesCS5A02G395200	0.49	0.3	0.26	0.35	1.97	2.11	2.36	2.14667	2.35	2.06	1.66	2.02333	4.59	3.29	6.32	4.73333	4.74	3.29	0.25	2.76
TraesCS1D02G251500	3.45	3.39	3.39	3.41	3.75	3.39	2.37	3.17	2.37	2.58	2.64	2.53	3.71	3.78	3.65	3.71333	3.54	1.17	3.56	2.75667
TraesCS5D02G495000	2.46	1.78	1.85	2.03	2.55	3.25	3.53	3.11	3.88	3.34	2.88	3.36667	2.59	2.84	3.84	3.09	3.99	1.55	2.73	2.75667
TraesCS6D02G379800	2.65	2.62	2.62	2.63	2.11	2.46	2.22	2.26333	1.38	2.06	2.21	1.88333	2.15	2.72	2.68	2.51667	2.85	1.29	4.11	2.75
TraesCS3D02G539900	6.69	5.28	5.49	5.82	5.58	6.84	3.64	5.35333	4.92	4.46	1.67	3.68333	5.53	6.47	3.69	5.23	5.56	2.64	0.04	2.74667
TraesCS6D02G348700	4.22	4.36	4.35	4.31	4.84	5.27	4.56	4.89	3.26	3.69	3.44	3.46333	5.21	5.54	5.15	5.3	4.86	1.18	2.19	2.74333
TraesCS5D02G553700	2.48	2.39	2.44	2.43667	3.07	2.37	2	2.48	1.71	2.13	1.82	1.88667	2.96	2.94	2.96	2.95333	2.65	1.22	4.35	2.74
TraesCS5D02G545100	2.7	2.39	2.58	2.55667	2.71	2.46	2.03	2.4	1.91	1.99	1.93	1.94333	2.63	2.3	2.9	2.61	2.34	0.86	5.02	2.74
TraesCS5D02G492300	2.4	2.03	2.09	2.17333	0.47	2.43	0.93	1.27667	1.26	0.81	2.89	1.65333	0.13	0.85	2.49	1.15667	0.22	1.87	6.13	2.74
TraesCS5D02G486500	4.94	4.66	4.62	4.74	5.84	5.07	3.96	4.95667	4.78	4.23	1.01	3.34	5.15	4.04	4.35	4.51333	5.06	1.37	1.78	2.73667
TraesCS5D02G548800	3.53	3.34	3.2	3.35667	3.64	3.7	3.08	3.47333	2.95	3.18	3.12	3.08333	4.16	4.21	3.82	4.06333	4.06	1.56	2.57	2.73
TraesCS5D02G475900	3.81	3.7	3.78	3.76333	2.21	3.52	2.52	2.75	1.79	2.46	3.6	2.61667	2.49	2.94	3.84	3.09	3.84	1.48	2.86	2.72667
TraesCS5D02G499700	3.44	3.05	3.18	3.22333	3.68	3.18	2.79	3.21667	2.71	2.45	2.25	2.47	3.43	3.65	3.49	3.52333	3.56	1.46	3.14	2.72
TraesCS3D02G528200	4.46	4.21	4.4	4.35667	4.69	4.04	3.44	4.05667	3.03	3.02	2.14	2.73	4.31	4.91	4.19	4.47	3.73	2	2.41	2.71333
TraesCS5D02G280700	0.18	0.45	0.45	0.36	0.05	1.41	0.79	0.75	0.49	0.98	3.94	1.80333	0.57	0.22	1.51	0.766667	1	2.65	4.49	2.71333
TraesCS7A02G138200	2.71	2.63	2.57	2.63667	2.53	2.58	3.28	2.79667	2.13	1.98	2.16	2.09	2.67	2.8	3.24	2.90333	2.87	1.52	3.73	2.70667
TraesCS5A02G398800	3.17	3.13	2.87	3.05667	4.35	3.23	2.52	3.36667	5.08	3.41	2.06	3.51667	4.95	3.61	4.21	4.25667	4.04	1.39	2.66	2.69667
TraesCS6D02G368200	3.91	3.25	3.31	3.49	4.13	3.95	3.83	3.97	3.35	3.28	2.64	3.09	4.69	4.7	4.29	4.56	4.2	2.38	1.5	2.69333
TraesCS3D02G541200	3.36	2.94	3.11	3.13667	3.49	3.35	2.6	3.14667	2.36	2.22	2.26	2.28	3.39	3.51	3.18	3.36	3.43	1.17	3.48	2.69333
TraesCS6D02G356600	1.94	1.04	0.91	1.29667	0	0	0	0	0.06	0	0	0.02	0	0	0.53	0.176667	0	7.95	0.13	2.69333
TraesCS1D02G250600	2.8	2.95	3.28	3.01	3.12	3.08	2.74	2.98	2.87	2.66	2.66	2.73	3.44	3.21	2.96	3.20333	2.82	1.36	3.89	2.69
TraesCS5D02G279000	1.95	1.88	2	1.94333	3.32	3.26	4.69	3.75667	6.22	4.29	5.39	5.3	2.79	2.98	3.7	3.15667	3.78	1.04	3.25	2.69
TraesCS5D02G503100	4.55	4.13	4.42	4.36667	4.72	4.3	4	4.34	3.42	3.06	2.92	3.13333	4.01	4.05	3.53	3.86333	3.51	1.42	3.13	2.68667
TraesCS5D02G500400	2.83	2.92	2.81	2.85333	3.08	3.26	3.44	3.26	2.92	2.84	3.28	3.01333	3.17	3.43	3.75	3.45	3.28	1.26	3.52	2.68667
TraesCS5D02G565000	3.01	1.69	1.72	2.14	3.46	3.75	5.18	4.13	6.07	5.17	6.07	5.77	3.12	2.74	3.82	3.22667	4.69	0.3	3.07	2.68667
TraesCS4A02G019000	3.43	3.62	3.42	3.49	4.08	3.74	2.54	3.45333	3.1	2.92	2.59	2.87	4.11	3.74	3.79	3.88	3.91	1.11	3.03	2.68333
TraesCS6D02G381800	2.99	3.17	3.26	3.14	3.67	3.46	2.94	3.35667	2.12	2.61	2.01	2.24667	3.91	3.79	3.91	3.87	3.17	1.46	3.41	2.68
TraesCS1A02G014100	0	0	0	0	0	0	0	0	0	0	0	0	0	0.31	0	0.103333	0	3.77	4.26	2.67667
TraesCS6D02G393700	2.02	2.77	2.66	2.48333	0.24	0.79	0.87	0.633333	0.61	2.2	4.58	2.46333	0.12	1.06	0.73	0.636667	1.68	3.62	2.72	2.67333
TraesCS6D02G390600	3.27	3.43	3.55	3.41667	4.01	4.04	3.8	3.95	3.23	3.66	2.27	3.05333	4.41	4.19	4.31	4.30333	3.49	1.36	3.16	2.67
TraesCS5D02G514200	0.01	0	0	0.00333333	0.39	0.5	0.79	0.56	0	0.1	0.01	0.0366667	3.26	3.07	4.44	3.59	4.4	2.05	1.55	2.66667
TraesCS6D02G350100	2.77	2.41	2.44	2.54	3.92	4.12	5.39	4.47667	6.28	5.67	5.45	5.8	3.37	3.04	4.54	3.65	4.11	0.83	3.04	2.66
TraesCS6D02G378200	4.46	3.8	3.96	4.07333	4.52	3.66	2.78	3.65333	3.77	3.42	2.08	3.09	4.17	3.29	3.31	3.59	3.61	1.25	3.12	2.66
TraesCS5D02G550500	2.93	2.65	2.68	2.75333	2.93	2.79	2.73	2.81667	2.99	2.54	2.93	2.82	3.61	3.65	3.16	3.47333	3.84	1.3	2.83	2.65667
TraesCS5D02G490000	4.43	4.16	4.06	4.21667	4.57	4.21	3.11	3.96333	4.75	3.5	2.87	3.70667	3.98	4.39	4.68	4.35	4.47	1.39	2.1	2.65333
TraesCS5D02G537700	0.87	1.45	1.21	1.17667	1.98	3.06	3.75	2.93	3.66	3.58	4.18	3.80667	2.26	2.21	3.95	2.80667	3.12	0.74	4.1	2.65333
TraesCS5D02G278600	4.07	4.13	3.96	4.05333	4.34	3.85	3.53	3.90667	3.12	4.1	4.26	3.82667	4.21	4.57	4.34	4.37333	3.91	1.3	2.72	2.64333
TraesCS5D02G279100	3.34	3.5	3.58	3.47333	2.97	4.27	1.49	2.91	2.05	3.89	3.95	3.29667	3.96	3.5	2.71	3.39	3.92	1.63	2.38	2.64333
TraesCS1A02G016900	4	4.04	4.12	4.05333	3.75	3.71	3.81	3.75667	2.52	3.01	2.41	2.64667	3.63	3.61	4.29	3.84333	3.26	1.01	3.65	2.64
TraesCS3D02G528500	3.18	3.34	3.19	3.23667	3.54	3.05	3.19	3.26	3.93	3.58	3.98	3.83	3.42	2.82	3.22	3.15333	3.38	1.15	3.39	2.64
TraesCS5D02G489700	4.64	3.93	4.02	4.19667	4.54	4.18	3.37	4.03	4.02	2.94	2.11	3.02333	4.76	4.43	4.06	4.41667	4.29	1.28	2.32	2.63
TraesCS5D02G516200	5.88	5.69	5.65	5.74	6.4	5.91	4.86	5.72333	5.77	4.95	3.51	4.74333	5.63	6.4	5.35	5.79333	4.37	1.67	1.84	2.62667
TraesCS5D02G497400	2.57	2.88	2.94	2.79667	3.23	2.91	2.5	2.88	2.5	2.63	2.91	2.68	2.79	2.68	3.15	2.87333	2.63	1.22	4.02	2.62333
TraesCS5D02G486400	3.7	3.23	3.35	3.42667	3.22	2.54	2.56	2.77333	3.28	2.38	2.61	2.75667	3.55	2.87	3.71	3.37667	4.2	1.94	1.72	2.62
TraesCS1D02G000531	0	0.15	0	0.05	0	0	0	0	0	0	0	0	0	0	0.01	0.00333333	0	7.78	0.07	2.61667
TraesCS7A02G134000	2.55	2.72	2.69	2.65333	1.02	2.3	0.28	1.2	0.21	0.73	1.02	0.653333	0.91	1.27	1.42	1.2	3.03	1.58	3.22	2.61
TraesCS5A02G393300	4.3	4.24	4.25	4.26333	4.05	4.49	4.41	4.31667	2.99	3.11	3.26	3.12	3.89	4.44	4.14	4.15667	3.66	1.19	2.97	2.60667
TraesCS5D02G492600	2.92	2.85	2.96	2.91	3.23	3.48	3.12	3.27667	2.05	2.29	2.36	2.23333	3.44	3.98	3.76	3.72667	3.06	1.9	2.85	2.60333
TraesCS1D02G004000	2.35	3.05	2.77	2.72333	2.39	2.81	2.79	2.66333	1.94	1.81	1.66	1.80333	2.41	3.07	2.96	2.81333	2.97	1.23	3.59	2.59667
TraesCS5D02G560600	3.56	3.54	3.51	3.53667	3.48	3.29	3.11	3.29333	2.51	2.98	3.33	2.94	3.44	3.69	3.66	3.59667	3.12	1.16	3.48	2.58667
TraesCS6D02G369200	2.73	2.41	2.4	2.51333	1.71	2.15	2.28	2.04667	2.24	1.7	1.96	1.96667	2.73	4.04	3.25	3.34	4.74	1.6	1.42	2.58667
TraesCS5D02G532800	0.17	0.54	0.5	0.403333	0.33	1.22	2.04	1.19667	0.39	0.05	0.13	0.19	5.2	4.79	4.7	4.89667	4.38	1.29	2.08	2.58333
TraesCS6B02G058400	5.13	5.56	5.83	5.50667	6.36	4.34	0.09	3.59667	5.48	4.56	0.1	3.38	7.43	5.33	4.36	5.70667	5.42	2.15	0.17	2.58
TraesCS6B02G060600	3.73	3.09	3.36	3.39333	3.47	3.48	2.83	3.26	2.86	2.7	2.47	2.67667	3.4	3.43	3.41	3.41333	3.25	1.04	3.45	2.58
TraesCS5D02G556800	3.38	3.54	3.53	3.48333	3.49	2.89	2.06	2.81333	3.08	2.51	1.86	2.48333	3.26	2.72	3.14	3.04	3.15	0.98	3.6	2.57667
TraesCS6D02G359700	0	0	0.01	0.00333333	0	0	0	0	0	0	0	0	0	0.15	0	0.05	0	1.85	5.88	2.57667
TraesCS5D02G484000	5.32	5.04	5.02	5.12667	3.02	5.1	1.56	3.22667	2.11	3.86	5.49	3.82	4.41	3.16	2.12	3.23	4.99	1.05	1.68	2.57333
TraesCS5D02G545200	0.23	1.85	1.45	1.17667	4.41	5.27	5.52	5.06667	5.95	6.68	8.1	6.91	4.71	5.62	5.28	5.20333	5.37	1.63	0.71	2.57
TraesCS5D02G286300	4.75	4.41	4.61	4.59	3.64	3.56	4.19	3.79667	4	2.75	2.52	3.09	3.34	4.2	4.14	3.89333	3.82	0.96	2.91	2.56333
TraesCS5A02G400600	3	3.29	3.23	3.17333	4.06	2.91	0.13	2.36667	2.56	2.24	0.08	1.62667	3.94	4.15	2.15	3.41333	3.31	2.94	1.44	2.56333
TraesCS5D02G534000	3.98	3.98	3.95	3.97	3.49	3.95	3.59	3.67667	3.34	3.45	3.31	3.36667	3.84	4.58	4.29	4.23667	4.8	1.37	1.51	2.56
TraesCS5A02G398100	3.25	3.41	3.22	3.29333	3.68	3.52	3.21	3.47	2.21	2.39	3.08	2.56	3.63	3.54	3.85	3.67333	3.76	0.93	2.98	2.55667
TraesCS6D02G393500	3.62	3.04	3.06	3.24	2.97	3.6	2.84	3.13667	2.29	2.07	2.4	2.25333	3.13	3.17	2.46	2.92	3.89	1.81	1.92	2.54
TraesCS6D02G392100	4.44	4.03	4.32	4.26333	4.5	3.87	1.67	3.34667	5.41	3.77	1.73	3.63667	3.67	4.72	3.44	3.94333	3.37	3.39	0.85	2.53667
TraesCS6D02G379200	4.34	5.06	5.07	4.82333	4.11	6.42	1.77	4.1	2.37	4.2	4.56	3.71	5.21	4.2	2.05	3.82	5.82	1.39	0.38	2.53
TraesCS5D02G500800	3.55	3.51	3.39	3.48333	3.33	3.1	3.08	3.17	2.34	2.02	2.24	2.2	3.19	3.4	3.35	3.31333	3.2	1.21	3.18	2.53
TraesCS3D02G540100	6.75	4.99	5.24	5.66	4.93	5.56	3.74	4.74333	4.96	4.1	3.36	4.14	4.24	5.79	4.03	4.68667	5.97	1.51	0.09	2.52333
TraesCS5D02G544900	3.68	3.4	3.57	3.55	3.95	3.9	3.63	3.82667	2.63	2.23	0.83	1.89667	3	4.14	3.32	3.48667	3.92	1.13	2.48	2.51
TraesCS7A02G136300	5.31	5.07	5.27	5.21667	4.19	4.72	4.06	4.32333	3.98	3.89	3.89	3.92	3.77	4.42	4	4.06333	3.9	1.09	2.53	2.50667
TraesCS5A02G403200	4.96	5.13	5.11	5.06667	3.48	6.32	1.59	3.79667	2.7	3.39	2.16	2.75	5.38	3.26	2.08	3.57333	5.03	0.88	1.61	2.50667
TraesCS5A02G404900	3.44	4.08	3.63	3.71667	2.44	3.51	1.92	2.62333	2.32	1.05	0.98	1.45	1.45	2.18	2.2	1.94333	3.88	3.27	0.37	2.50667
TraesCS3D02G539000	2.41	2.23	2.09	2.24333	2.5	3.2	3.41	3.03667	1.61	1.61	2.01	1.74333	3.15	3.55	4.05	3.58333	3.43	0.77	3.31	2.50333
TraesCS5D02G501700	3.77	3.26	3.46	3.49667	3.85	3.3	2.66	3.27	2.83	2.45	1.91	2.39667	3.31	3.78	3.49	3.52667	3.57	1.38	2.55	2.5
TraesCS6D02G385500	6.1	5.87	5.85	5.94	6.04	4.64	0.1	3.59333	4.89	4.16	0.06	3.03667	7.19	4.44	4.87	5.5	5.23	2.21	0.04	2.49333
TraesCS6D02G354200	3.68	3.82	3.72	3.74	2.79	3.62	3.9	3.43667	2.31	2.44	3.1	2.61667	2.25	3.24	3.64	3.04333	3.42	1.66	2.39	2.49
TraesCS1D02G002300	2.59	2.58	2.66	2.61	3.12	2.61	2.26	2.66333	1.86	2.03	2.18	2.02333	3.82	3.36	3.36	3.51333	3.19	1.37	2.89	2.48333
TraesCS6D02G348500	2.99	2.92	3.08	2.99667	2.89	3.31	2.56	2.92	1.89	2.11	2.7	2.23333	2.82	3.18	3.14	3.04667	3.79	0.97	2.69	2.48333
TraesCS5D02G491900	6.29	4.54	4.49	5.10667	4.21	3.95	1.58	3.24667	4.08	3.51	4.91	4.16667	4.67	5.52	3.9	4.69667	6.66	0.61	0.15	2.47333
TraesCS1A02G015200	4.27	3.47	3.65	3.79667	4.31	4.17	3.66	4.04667	3.25	2.6	2.3	2.71667	3.92	4.33	3.64	3.96333	3.77	1.02	2.6	2.46333
TraesCS5D02G480400	1.12	2.26	2.26	1.88	2.23	2.98	3.27	2.82667	1.79	2.39	2.31	2.16333	3.21	3.7	3.9	3.60333	3.39	1.08	2.92	2.46333
TraesCS6D02G366500	2.97	2.34	2.76	2.69	3.49	2.63	2.41	2.84333	2.66	2.76	1.83	2.41667	3.21	2.83	3.21	3.08333	3	1.19	3.2	2.46333
TraesCS5D02G473000	0.45	0.39	0.25	0.363333	0.51	0.74	0.07	0.44	0.13	0.25	0.17	0.183333	1.7	0.85	0.83	1.12667	1.37	1.99	4.03	2.46333
TraesCS7A02G138400	5.29	5.61	5.76	5.55333	5.18	5.22	5.8	5.4	4.06	4.07	4.13	4.08667	3.61	4.99	4.2	4.26667	3.17	1.35	2.86	2.46
TraesCS5D02G530200	1.68	1.28	1.43	1.46333	4.62	4.91	6.82	5.45	8.12	6.29	6.22	6.87667	3.98	4.65	4.63	4.42	5.28	1.06	0.99	2.44333
TraesCS5D02G472000	1.83	3.85	3.61	3.09667	1.72	3.87	3.19	2.92667	0.88	3.31	5.3	3.16333	2.13	3.21	3.79	3.04333	4.32	0.86	2.15	2.44333
TraesCS1A02G033500	2.5	1.41	1.21	1.70667	4.48	3.89	4.21	4.19333	7.77	7.41	2.64	5.94	3.01	3.7	1.97	2.89333	3.99	1.97	1.33	2.43
TraesCS6D02G358600	3.23	2.98	2.97	3.06	3.07	2.9	2.34	2.77	2.08	2.6	2.89	2.52333	3.31	3.67	3.15	3.37667	3.5	1.37	2.41	2.42667
TraesCS1A02G025200	2.95	3.08	3.1	3.04333	3.29	3.6	4.15	3.68	2.27	3.21	4	3.16	2.81	4.49	4.04	3.78	3.19	1.16	2.91	2.42
TraesCS6B02G055300	6.32	5.1	5.15	5.52333	6.21	4.59	0.26	3.68667	5.53	4.46	0.15	3.38	7.07	4.37	4.08	5.17333	5.5	1.58	0.16	2.41333
TraesCS6B02G055500	6.32	5.1	5.15	5.52333	6.21	4.59	0.26	3.68667	5.53	4.46	0.15	3.38	7.07	4.37	4.08	5.17333	5.5	1.58	0.16	2.41333
TraesCS5D02G504600	2.35	1.87	1.74	1.98667	5.24	5.05	6.8	5.69667	8.57	6.98	5.88	7.14333	4.58	5.11	4.3	4.66333	5.69	1.11	0.44	2.41333
TraesCS3D02G537000	4.63	3.99	4.06	4.22667	4.18	3.81	3.28	3.75667	4.57	3.5	2.02	3.36333	3.63	3.66	3.62	3.63667	3.36	0.89	2.98	2.41
TraesCS1A02G034300	3.44	3.23	3.2	3.29	3.9	3.75	3.46	3.70333	2.78	2.22	0.79	1.93	3.65	3.78	3.41	3.61333	3.18	1	3.05	2.41
TraesCS4A02G016800	3.29	3.75	3.82	3.62	3.64	4.08	2.18	3.3	1.48	2.77	2.34	2.19667	2.85	2.36	1.72	2.31	3.06	0.52	3.65	2.41
TraesCS5D02G563800	3.63	3.12	3.32	3.35667	3.55	3.58	4.41	3.84667	4.28	3.66	3.41	3.78333	2.73	3.27	3.53	3.17667	3.33	1.35	2.54	2.40667
TraesCS1A02G031200	2.31	3.62	3.42	3.11667	2.53	2.75	3.19	2.82333	1.42	2.13	2.94	2.16333	2.04	2.88	3.3	2.74	2.64	1.12	3.46	2.40667
TraesCS5D02G504500	0	0	0.02	0.00666667	0.03	0.06	0	0.03	0	0	0	0	0	0.39	0	0.13	0	0.19	7.02	2.40333
TraesCS5D02G474800	5.77	5.46	5.61	5.61333	6.43	4.52	0.03	3.66	5.12	4.79	0.08	3.33	6.91	4.91	4.32	5.38	5.18	1.98	0.03	2.39667
TraesCS1A02G030600	3.84	4.28	4.13	4.08333	3.95	4.43	3.77	4.05	2.91	2.91	3.29	3.03667	3.58	4.41	4.19	4.06	3.42	1.11	2.66	2.39667
TraesCS5D02G485500	2.72	2.14	2.03	2.29667	0.4	3.32	2.71	2.14333	2.09	1.47	2.42	1.99333	1.07	0.93	3.23	1.74333	3.66	0.6	2.92	2.39333
TraesCS5D02G506900	3.83	3.96	3.84	3.87667	3.71	3.78	3.36	3.61667	3.27	3.06	3.55	3.29333	3.52	3.31	3.28	3.37	3.19	0.72	3.25	2.38667
TraesCS3D02G529800	2.97	2.77	2.8	2.84667	3.32	3.1	2.9	3.10667	3.15	2.77	2.61	2.84333	4.05	3.31	3.37	3.57667	3.64	1.63	1.88	2.38333
TraesCS5D02G502600	1.83	1.62	1.67	1.70667	2.85	2.72	2.29	2.62	3.01	1.99	2.28	2.42667	3.32	3.79	4.1	3.73667	4	1.86	1.27	2.37667
TraesCS6B02G059000	0	0	0	0	0.13	1.22	2.87	1.40667	0.23	0.08	1.43	0.58	0.03	0.23	3.32	1.19333	0.25	0.13	6.71	2.36333
TraesCS6D02G352100	3.07	3.36	3.38	3.27	3.28	2.82	2.19	2.76333	2.14	2.34	2.19	2.22333	3.71	3.09	2.96	3.25333	3.01	0.94	3.11	2.35333
TraesCS5D02G507300	2.45	4.53	4.21	3.73	2.17	3.31	3.37	2.95	1.83	3.18	2.12	2.37667	2.91	2.8	2.8	2.83667	2.11	0.53	4.42	2.35333
TraesCS5D02G550400	3.02	2.06	2.2	2.42667	1.85	2.44	1.78	2.02333	1.14	1.7	2.49	1.77667	2.04	2.75	2.65	2.48	3.06	0.66	3.33	2.35
TraesCS5D02G562300	2.73	2.92	2.89	2.84667	3.26	2.75	2.74	2.91667	2.46	2.4	2.08	2.31333	3.15	2.88	3.17	3.06667	2.66	1.19	3.18	2.34333
TraesCS5A02G403100	3.42	2.9	3.15	3.15667	3.5	3.08	2.81	3.13	2.79	2.47	2.25	2.50333	3.65	3.26	3.58	3.49667	3.31	1.32	2.39	2.34
TraesCS5D02G531600	2.27	2.15	2.31	2.24333	2.16	2.22	1.82	2.06667	1.72	1.73	2.11	1.85333	2.72	2.04	3.15	2.63667	2.73	0.5	3.78	2.33667
TraesCS6D02G377100	3.67	2.83	2.97	3.15667	3.1	3.08	2.32	2.83333	2.38	2.25	2.26	2.29667	3.17	3.54	2.67	3.12667	3.31	0.75	2.92	2.32667
TraesCS6D02G377200	1.91	2.17	2.34	2.14	2.57	2.42	1.67	2.22	1.21	1.87	1.9	1.66	2.92	2.47	2.31	2.56667	2.35	1.99	2.63	2.32333
TraesCS1A02G024500	2.86	2.97	3.25	3.02667	2.91	3.06	2.94	2.97	2.53	2.33	2.8	2.55333	2.76	3.24	3.43	3.14333	2.73	0.94	3.29	2.32
TraesCS5D02G472100	2.36	2.16	2.26	2.26	2.74	2.33	2.17	2.41333	1.67	1.84	1.46	1.65667	2.85	2.92	3.13	2.96667	2.82	1.53	2.59	2.31333
TraesCS7D02G140200	5.37	5.57	5.67	5.53667	5.12	5.28	5.73	5.37667	3.99	4.03	3.94	3.98667	3.54	5.09	4.33	4.32	3.41	1.09	2.41	2.30333
TraesCS1D02G250700	4.37	3.66	3.84	3.95667	4.3	3.07	2.03	3.13333	3.08	2.38	1.67	2.37667	3	4.9	3.7	3.86667	3.99	1.56	1.36	2.30333
TraesCS5D02G536100	2.47	2.03	2.14	2.21333	3.62	3.02	3.62	3.42	5.49	4.67	3	4.38667	2.99	2.78	3.26	3.01	3.23	0.61	3.07	2.30333
TraesCS6D02G345800	2.28	1.96	2.15	2.13	2.38	2.1	1.5	1.99333	1.21	1.9	2.1	1.73667	2.71	1.95	2.6	2.42	2.8	0.75	3.34	2.29667
TraesCS1A02G024200	0.58	0.92	1.14	0.88	2.62	2.81	2.59	2.67333	0.31	1.83	2.65	1.59667	3.28	3.22	3.63	3.37667	3.2	0.94	2.73	2.29
TraesCS5D02G557100	2.91	2.85	2.93	2.89667	3.22	3.05	1.48	2.58333	1.98	2.24	2.06	2.09333	3.87	2.87	2.98	3.24	2.79	0.91	3.12	2.27333
TraesCS1D02G251000	2.85	2.38	2.53	2.58667	3.19	2.8	3.04	3.01	3.19	2.44	2.23	2.62	3.25	2.92	3.57	3.24667	2.78	0.95	3.05	2.26
TraesCS3D02G544000	2.8	2.94	2.79	2.84333	3.03	2.69	2.94	2.88667	2.03	2.56	1.33	1.97333	3.85	2.57	2.68	3.03333	2.56	0.76	3.45	2.25667
TraesCS6D02G388400	2.41	2.25	2.31	2.32333	2.68	1.83	1.53	2.01333	1.84	1.9	1.45	1.73	2.99	2.26	2.57	2.60667	2.26	0.91	3.59	2.25333
TraesCS5D02G515900	4.48	3.82	4.11	4.13667	4.21	3.87	3.21	3.76333	3.23	2.79	2.59	2.87	4.05	4.59	3.6	4.08	4	1.33	1.42	2.25
TraesCS5D02G560700	2.4	2.46	2.59	2.48333	2.31	2.24	2.51	2.35333	2.07	1.88	2.5	2.15	2.64	2.59	2.87	2.7	2	1.71	3.04	2.25
TraesCS4A02G019900	1.42	1.57	1.84	1.61	1.35	2.48	2.74	2.19	1.16	2.1	4.25	2.50333	1.79	2.02	2.75	2.18667	2.74	0.68	3.33	2.25
TraesCS4A02G022500	4.26	3.39	3.41	3.68667	5.24	4.4	0.52	3.38667	3.83	3.78	0.01	2.54	6.16	5.32	4.09	5.19	4.58	1.88	0.28	2.24667
TraesCS1A02G029800	4.84	6.12	6.19	5.71667	4.94	5.8	3.52	4.75333	3.16	5.1	5.43	4.56333	5.01	3.91	2.96	3.96	4.5	1.95	0.29	2.24667
TraesCS5D02G538200	2.96	2.49	2.67	2.70667	3.3	2.66	2.56	2.84	2.81	2.54	2.22	2.52333	3.46	3.21	3.36	3.34333	3.07	1.25	2.42	2.24667
TraesCS4A02G019800	0.68	2.47	2.27	1.80667	0.99	1.86	2.44	1.76333	1.16	1.03	1.1	1.09667	0.02	1.01	2.22	1.08333	4.9	0.49	1.35	2.24667
TraesCS3D02G530400	3.68	3.79	3.83	3.76667	3.53	4.02	3.74	3.76333	3.59	2.99	3.09	3.22333	2.8	3.68	3.94	3.47333	3.67	1.43	1.62	2.24
TraesCS5D02G503800	2.97	2.72	2.72	2.80333	3.29	2.97	2.38	2.88	3.38	2.26	1.98	2.54	2.55	2.17	2.17	2.29667	1.99	2	2.73	2.24
TraesCS6D02G378300	3.28	4.04	3.91	3.74333	4.07	3.94	4.56	4.19	2.79	4.53	5	4.10667	5.19	4.93	3.34	4.48667	2.87	0.89	2.95	2.23667
TraesCS6D02G389500	7.84	8.75	8.51	8.36667	5.48	4.97	2.24	4.23	4.59	5.42	6.85	5.62	0.87	2.25	5.71	2.94333	2.2	0.87	3.63	2.23333
TraesCS1A02G022500	2.39	2.34	2.37	2.36667	2.6	2.86	2.7	2.72	2.27	2.28	2.78	2.44333	3.5	3.34	3.72	3.52	3.43	1.16	2.08	2.22333
TraesCS5D02G529100	1.74	1.86	1.97	1.85667	1.83	1.9	1.44	1.72333	1.25	1.38	1.23	1.28667	2.01	2.08	2.22	2.10333	2.02	0.85	3.8	2.22333
TraesCS5D02G549500	2.69	1.9	2.2	2.26333	2.52	2.21	2.13	2.28667	1.84	1.64	1.11	1.53	3.08	2.45	2.78	2.77	2.41	1.03	3.21	2.21667
TraesCS5D02G496800	5.37	4.7	4.77	4.94667	4.36	4.04	3.98	4.12667	4.19	3.73	3.1	3.67333	3.57	4.72	3.71	4	3.85	2.34	0.45	2.21333
TraesCS5D02G491000	2.61	3.01	2.82	2.81333	0.83	2.65	0.66	1.38	0.43	1.28	6.36	2.69	1.51	1.57	3.62	2.23333	3.33	1.95	1.36	2.21333
TraesCS5D02G503500	3.35	2.27	2.35	2.65667	2.76	3.71	2.45	2.97333	2.35	3.46	4.64	3.48333	1.71	1.86	2.59	2.05333	2.94	1.3	2.37	2.20333
TraesCS5D02G531300	3.04	2.91	2.96	2.97	3.15	3.05	1.81	2.67	1.88	2.17	2.04	2.03	3.43	3.32	2.48	3.07667	3	1.44	2.16	2.2
TraesCS5A02G405700	4.33	3.11	3.16	3.53333	4.09	4.34	0.44	2.95667	3.54	3.25	0.55	2.44667	5.28	5.15	3.43	4.62	3.88	1.63	1.07	2.19333
TraesCS1D02G252200	3.01	3.26	3.14	3.13667	3.16	2.63	2.33	2.70667	2.18	1.81	1.83	1.94	3.28	2.91	3.21	3.13333	3.23	0.77	2.58	2.19333
TraesCS5D02G481500	1.4	1.02	1.16	1.19333	4.82	4.83	7.55	5.73333	8.43	7.17	6.94	7.51333	4	4.62	4.81	4.47667	5.52	0.72	0.33	2.19
TraesCS6D02G394000	2.38	2.86	3.03	2.75667	2.9	3.03	2.7	2.87667	1.77	2.32	2.2	2.09667	3.37	2.87	3.28	3.17333	2.84	0.96	2.74	2.18
TraesCS5D02G508500	2.04	1.9	2	1.98	1.72	2.17	2.32	2.07	1.44	1.79	2.49	1.90667	1.94	1.88	3.04	2.28667	2.41	0.5	3.63	2.18
TraesCS3D02G534100	2.25	4.46	4.86	3.85667	1.81	6.6	6.79	5.06667	3.47	4.42	7.16	5.01667	0.8	2.04	5.6	2.81333	4.62	1.91	0	2.17667
TraesCS1D02G251600	3.28	3.18	3.3	3.25333	3.2	3.21	3.03	3.14667	2.51	2.16	2.13	2.26667	2.24	3.12	2.82	2.72667	2.68	0.91	2.93	2.17333
TraesCS6D02G371300	1.74	1.99	2.22	1.98333	2.25	1.85	1.56	1.88667	1.51	1.66	1.26	1.47667	2.26	1.73	2.12	2.03667	1.92	0.5	4.09	2.17
TraesCS6B02G059400	2.91	2.33	2.54	2.59333	3.37	3.07	2.1	2.84667	2.43	1.86	0.91	1.73333	3.48	3.31	2.88	3.22333	2.91	1.73	1.86	2.16667
TraesCS7D02G142700	0.38	0.24	0.17	0.263333	2.63	2.4	0.21	1.74667	2.14	1.22	0.1	1.15333	2.96	3.54	2.73	3.07667	3.96	0.73	1.81	2.16667
TraesCS5D02G555600	2.29	2.25	2.23	2.25667	3.05	2.1	1.42	2.19	1.47	1.98	1.07	1.50667	3.52	2.65	2.93	3.03333	2.47	0.88	3.15	2.16667
TraesCS6D02G389800	3.13	2.95	3.11	3.06333	2.86	2.61	2.01	2.49333	2.3	1.82	1.4	1.84	2.73	3.16	2.96	2.95	3.16	1.22	2.12	2.16667
TraesCS6D02G368900	1.93	2.15	2.16	2.08	1.16	2.1	1.81	1.69	1.15	1.23	2.11	1.49667	1.89	2.2	2.12	2.07	3.28	0.77	2.45	2.16667
TraesCS7A02G131200	4.84	4.48	4.48	4.6	6.03	4.34	0.56	3.64333	3.78	4.14	0.47	2.79667	6.64	4.27	4.12	5.01	4.35	0.93	1.21	2.16333
TraesCS6D02G358500	2.12	2.05	2.13	2.1	3.78	3.42	3.54	3.58	4.28	3.98	3.67	3.97667	3.53	4.14	3.2	3.62333	3.15	1.01	2.33	2.16333
TraesCS5D02G487100	4.04	3.49	3.58	3.70333	3.92	3.19	2.64	3.25	2.98	2.52	2.23	2.57667	4.39	3.76	3.73	3.96	3.27	1.03	2.17	2.15667
TraesCS7D02G136300	5	4.37	4.6	4.65667	3.97	4.2	3.52	3.89667	3.8	3.42	3.16	3.46	3.55	4.19	3.51	3.75	3.25	1.39	1.81	2.15
TraesCS5A02G401400	4.08	3.35	3.36	3.59667	3.12	3.49	2.1	2.90333	2.02	3.15	3.82	2.99667	3.71	3.17	2.63	3.17	3.76	0.92	1.76	2.14667
TraesCS5A02G400700	4.07	4.9	4.71	4.56	3.72	4.41	2.34	3.49	1.87	2.86	3.83	2.85333	3.8	2.74	1.82	2.78667	4.51	1.82	0.11	2.14667
TraesCS6D02G365300	2.92	2.56	2.66	2.71333	3.11	3.14	2.49	2.91333	2.56	2.83	1.92	2.43667	3.86	3.71	2.91	3.49333	3.59	1.1	1.74	2.14333
TraesCS5D02G504200	3.65	4.64	4.43	4.24	2.55	2.03	2.26	2.28	2.42	0.37	2.91	1.9	0.11	0.15	0.43	0.23	1.35	1.18	3.9	2.14333
TraesCS5D02G564100	4.06	3.31	3.6	3.65667	2.99	3.23	2.91	3.04333	2.48	2.13	2.61	2.40667	2.4	3.05	2.82	2.75667	3.06	0.85	2.5	2.13667
TraesCS7D02G146100	1.8	1.81	1.91	1.84	2.23	1.78	1.98	1.99667	1.59	1.57	1.83	1.66333	2.63	2.53	2.59	2.58333	2.21	2.56	1.63	2.13333
TraesCS4A02G018700	0.97	1.3	1.31	1.19333	1.31	1.12	1.21	1.21333	0.72	0.67	0.68	0.69	1.84	1.75	2.17	1.92	1.88	0.73	3.77	2.12667
TraesCS6B02G060800	2.33	2.8	2.51	2.54667	0.39	1.75	0.36	0.833333	0.7	2.24	2.59	1.84333	1.4	0.96	0.58	0.98	4.18	1.07	1.13	2.12667
TraesCS1D02G004700	3.3	3.89	3.89	3.69333	2.38	3.53	2.58	2.83	1.68	3.49	3.27	2.81333	2.91	2.94	2.34	2.73	3.6	0.99	1.78	2.12333
TraesCS5D02G565400	3.27	2.97	3.13	3.12333	3.6	2.85	1.94	2.79667	2.19	2.3	2.09	2.19333	3.97	3.12	2.99	3.36	2.87	0.91	2.57	2.11667
TraesCS6D02G393300	3.77	3.01	3.1	3.29333	4.13	3.45	2.29	3.29	2.69	2.15	0.94	1.92667	4.38	4.28	3.21	3.95667	3.25	1.05	2.04	2.11333
TraesCS5D02G485400	2.52	2.36	2.52	2.46667	2.67	2.52	2.41	2.53333	1.56	1.67	1.69	1.64	2.95	3.27	3.12	3.11333	3.05	1.11	2.18	2.11333
TraesCS5D02G484900	0.01	0.78	0.65	0.48	0.03	0.01	0.03	0.0233333	0.03	0.03	0.01	0.0233333	0.03	0.23	0.13	0.13	0.03	0	6.31	2.11333
TraesCS1A02G019200	2.62	2.69	2.69	2.66667	3.11	2.66	2	2.59	2.17	2.17	1.8	2.04667	2.94	2.57	2.88	2.79667	2.45	1.11	2.76	2.10667
TraesCS5D02G496100	2.03	1.7	1.69	1.80667	2.75	1.83	1.05	1.87667	1.72	1.63	0.73	1.36	3.05	2.09	2.68	2.60667	2.5	0.79	3.03	2.10667
TraesCS7D02G141100	3.71	3.44	3.53	3.56	3.92	3.46	3.28	3.55333	3.09	2.23	1.58	2.3	3.05	4.1	3.49	3.54667	3.79	1	1.5	2.09667
TraesCS3D02G536200	3.91	4.02	4.09	4.00667	3.05	3.96	2.18	3.06333	2.65	3.52	3.79	3.32	2.45	3.2	3.14	2.93	3.64	1.46	1.17	2.09
TraesCS6D02G356000	3.26	3.33	3.36	3.31667	3.78	3.39	3.19	3.45333	3.35	2.97	2.5	2.94	3.39	3.97	2.86	3.40667	2.95	1.53	1.78	2.08667
TraesCS5D02G515800	2.79	2.24	2.43	2.48667	3.27	2.03	1.38	2.22667	1.8	2.11	1.11	1.67333	3.3	2.32	2.65	2.75667	2.37	0.55	3.34	2.08667
TraesCS5D02G281300	1.43	1.4	1.79	1.54	2.27	2.01	1.78	2.02	1.27	2.13	1.52	1.64	2.2	1.96	2.53	2.23	2.18	0.68	3.4	2.08667
TraesCS6D02G391200	2.41	2.44	2.42	2.42333	2.59	1.89	1.96	2.14667	2.28	1.84	1.93	2.01667	2.74	2.47	2.72	2.64333	2.53	0.98	2.74	2.08333
TraesCS5D02G475000	0	0	0	0	0	0	0	0	0	0	0	0	0	0	0	0	6.24	0	0	2.08
TraesCS3D02G534200	1.01	3.52	3.73	2.75333	1.79	5.37	5.1	4.08667	0.23	2.03	2.85	1.70333	4.85	5.22	5.15	5.07333	5.58	0.63	0	2.07
TraesCS6B02G052600	0	0	0	0	0	0	0	0	0	0	0	0	0.27	0	1.02	0.43	6.2	0	0	2.06667
TraesCS5D02G534600	1.93	2.73	2.8	2.48667	3.89	2.3	1.93	2.70667	2.89	3.72	3.07	3.22667	3.42	3.19	2.73	3.11333	4.11	1.6	0.48	2.06333
TraesCS6B02G055600	2.41	2.16	2.02	2.19667	2.01	2.28	2.13	2.14	1.8	1.37	1.3	1.49	2.64	2.34	2.87	2.61667	2.57	0.68	2.93	2.06
TraesCS5D02G283500	3.34	2.99	2.96	3.09667	3.28	2.77	1.98	2.67667	2.5	2.04	1.46	2	2.74	2.51	2.78	2.67667	2.76	0.93	2.47	2.05333
TraesCS5D02G500000	1.56	0.78	0.75	1.03	1.03	0.62	0	0.55	3.56	2.09	0.27	1.97333	0	0.14	0.37	0.17	1.44	2.01	2.71	2.05333
TraesCS5A02G403300	1.43	0.91	0.72	1.02	2.69	3.83	4.35	3.62333	5.09	5.04	5.81	5.31333	2.46	2.77	3.63	2.95333	4.04	0.29	1.82	2.05
TraesCS5D02G284900	2.45	2.17	2.48	2.36667	2.49	1.86	1.92	2.09	1.89	1.74	1.87	1.83333	1.8	2.28	2.36	2.14667	2.19	0.64	3.31	2.04667
TraesCS5D02G503700	2.03	1.9	1.89	1.94	2.23	1.8	1.42	1.81667	1.44	1.61	1.19	1.41333	2.52	1.93	2.33	2.26	2.19	0.8	3.13	2.04
TraesCS6D02G379300	2.87	3.02	3.12	3.00333	2.97	3.19	2.95	3.03667	1.87	1.99	2.06	1.97333	2.71	3.44	3.02	3.05667	2.48	1.01	2.62	2.03667
TraesCS1A02G029200	2.6	2.39	2.48	2.49	3.82	2.49	0.83	2.38	1.55	2.28	0.64	1.49	3.99	2.94	1.96	2.96333	2.04	0.89	3.15	2.02667
TraesCS1A02G027500	0.16	0.3	0.41	0.29	1.73	1.63	2.17	1.84333	0.44	0.92	0.49	0.616667	3.48	2.87	3.48	3.27667	3.15	0.68	2.24	2.02333
TraesCS5D02G282600	2.28	2.37	2.62	2.42333	2.43	3.09	2.78	2.76667	1.59	2.03	2.18	1.93333	2.46	2.96	3.27	2.89667	2.55	1.47	2.05	2.02333
TraesCS5D02G491100	3.19	4.85	4.81	4.28333	2.69	4.15	2.16	3	0.77	1.18	4.45	2.13333	1.52	1.93	2.87	2.10667	4.08	1.96	0.03	2.02333
TraesCS5D02G552000	3.56	2.99	3.11	3.22	4.64	4.67	0.99	3.43333	3.52	3.98	1.97	3.15667	5.59	5.05	4.93	5.19	5.52	0.5	0.03	2.01667
TraesCS6D02G358800	1.75	1.86	2.1	1.90333	1.78	2.71	3.78	2.75667	2.52	2.81	3.62	2.98333	1.75	2.6	3.07	2.47333	2.72	0.75	2.58	2.01667
TraesCS5A02G404500	0.57	0.78	1.09	0.813333	4.03	4.16	5.82	4.67	7.57	6.11	5.54	6.40667	3.24	3.93	3.82	3.66333	4.78	0.44	0.81	2.01
TraesCS6D02G382400	1.89	2.39	2.18	2.15333	1.66	2.43	1.92	2.00333	1.39	1	0.92	1.10333	1.98	3.17	3.81	2.98667	4.29	0.82	0.91	2.00667
TraesCS6D02G390000	1.94	1.73	1.54	1.73667	4.85	4.95	6.85	5.55	8.42	6.64	5.99	7.01667	3.81	4.67	4.14	4.20667	5.26	0.43	0.32	2.00333
TraesCS5D02G513300	2.42	2.32	2.54	2.42667	2.41	2.84	2.51	2.58667	1.59	2.16	2.17	1.97333	3.23	3.3	2.93	3.15333	2.6	0.94	2.47	2.00333
TraesCS5D02G497000	2.28	1.88	2.14	2.1	2.13	1.98	1.58	1.89667	1.39	1.48	1.35	1.40667	2.92	2.56	2.88	2.78667	3.11	1.14	1.73	1.99333
TraesCS6D02G360800	0.95	3.4	3.02	2.45667	2.07	0.7	1.56	1.44333	0.8	1.04	0.95	0.93	2.54	2.13	1.15	1.94	1.41	0.77	3.8	1.99333
TraesCS6D02G357700	0.31	0.35	0.45	0.37	2.02	1.76	0.89	1.55667	1.13	1.33	0.22	0.893333	4.3	3.46	2.2	3.32	3.85	0.4	1.72	1.99
TraesCS5D02G523600	3.7	3.37	3.33	3.46667	3.91	3.25	2.04	3.06667	3.24	2.58	1.53	2.45	3.66	2.93	3.01	3.2	3.1	0.81	2.05	1.98667
TraesCS5A02G399000	2.72	3.02	2.79	2.84333	3.05	2.03	1.13	2.07	2.02	1.82	0.97	1.60333	2.83	1.43	2.44	2.23333	2.41	0.37	3.18	1.98667
TraesCS6D02G358700	3.22	3.69	3.88	3.59667	3.63	3.89	3.01	3.51	2.4	4.2	4.24	3.61333	4.33	4.7	2.75	3.92667	3.34	1.71	0.9	1.98333
TraesCS1A02G017000	2.66	2.28	2.37	2.43667	2.85	2.31	2.35	2.50333	2.17	1.88	1.46	1.83667	3.09	2.85	2.59	2.84333	2.64	0.91	2.4	1.98333
TraesCS4A02G017500	2.8	3.14	3.47	3.13667	3	2.15	2.37	2.50667	2.97	3.11	2.82	2.96667	3.15	3.93	2.92	3.33333	2.65	0.87	2.41	1.97667
TraesCS5A02G395100	2.45	2.67	2.68	2.6	1.84	2.92	1.32	2.02667	0.79	1.96	3.88	2.21	2.02	2.53	1.79	2.11333	2.73	1.25	1.94	1.97333
TraesCS6D02G382000	2.03	2.36	2.46	2.28333	3.21	3.03	2.26	2.83333	1.25	1.84	1.19	1.42667	3.85	3.73	3.31	3.63	2.94	0.97	2	1.97
TraesCS5D02G508600	1.63	1.22	1.39	1.41333	1.69	2.08	2.13	1.96667	1.33	1.66	1.69	1.56	1.81	1.74	2.47	2.00667	1.96	0.5	3.45	1.97
TraesCS5D02G471300	1.45	1.34	1.83	1.54	1.98	2.04	1.79	1.93667	0.99	1.25	1.23	1.15667	2.03	1.67	2.24	1.98	1.82	0.57	3.52	1.97
TraesCS4A02G018900	2.21	1.82	1.82	1.95	2.44	2.6	1.85	2.29667	2.34	0.75	0.56	1.21667	3.41	3.57	2.87	3.28333	3.24	0.41	2.25	1.96667
TraesCS6D02G362600	2.55	2.83	2.76	2.71333	3.08	2.39	2.17	2.54667	2.11	2.25	2.07	2.14333	2.4	2.36	2.35	2.37	2.43	0.54	2.93	1.96667
TraesCS5D02G553600	2.59	2.73	2.71	2.67667	3.67	2.47	1.9	2.68	2.47	3.08	1.88	2.47667	3.42	2.73	2.77	2.97333	2.82	0.62	2.45	1.96333
TraesCS5D02G284200	2.41	2.38	2.6	2.46333	2.67	2.75	2.04	2.48667	1.64	2.12	2.04	1.93333	3	2.5	2.59	2.69667	2.21	0.79	2.87	1.95667
TraesCS5D02G284600	0.12	0.58	0.71	0.47	0.92	1.44	1.71	1.35667	0.12	0.46	0.38	0.32	2.21	2.58	2.5	2.43	2.72	0.05	3.1	1.95667
TraesCS6D02G384000	0.65	0.92	1.2	0.923333	0.73	1.95	0.67	1.11667	0.68	1.14	2.65	1.49	4.23	4.24	3.97	4.14667	4.38	0.7	0.78	1.95333
TraesCS1A02G015400	4.27	4.59	4.69	4.51667	4.24	3.93	1.58	3.25	3.87	2.82	0.56	2.41667	3.43	4.74	2.47	3.54667	3.32	2.11	0.42	1.95
TraesCS3D02G540500	3.23	3.35	3.53	3.37	3.06	2.38	0.66	2.03333	1.84	1.94	2.14	1.97333	4.69	2.7	1.37	2.92	5.15	0.55	0.15	1.95
TraesCS5D02G472300	2.89	2.39	2.54	2.60667	3.56	2.01	0.02	1.86333	1.81	1.89	0.01	1.23667	4.44	2.14	2.53	3.03667	2.73	1.05	2.06	1.94667
TraesCS6D02G377800	2.62	2.61	2.67	2.63333	3.03	2.53	2.15	2.57	2.1	2.09	2.12	2.10333	2.87	2.9	2.97	2.91333	2.6	0.86	2.38	1.94667
TraesCS5D02G562400	2.18	1.98	2.13	2.09667	2.48	2.14	2.39	2.33667	2.48	2.37	1.72	2.19	2.61	2.59	2.72	2.64	2.28	1.08	2.48	1.94667
TraesCS1A02G020600	2.07	2.44	2.21	2.24	2.56	2.18	2.05	2.26333	2.22	1.75	1.7	1.89	2.58	2.28	2.48	2.44667	2.87	0.67	2.3	1.94667
TraesCS7A02G133000	1.75	2.09	1.96	1.93333	2.44	1.64	1.04	1.70667	1.12	1.72	1.24	1.36	2.58	1.78	2.04	2.13333	1.38	0.75	3.69	1.94
TraesCS3D02G537300	2.54	2.96	2.64	2.71333	3.85	3.79	2.19	3.27667	4.72	3.96	1.17	3.28333	3.35	5.29	3.2	3.94667	4.55	0.54	0.72	1.93667
TraesCS6D02G393600	3.32	3.19	3.25	3.25333	3.01	3.33	1.94	2.76	1.63	1.83	2.31	1.92333	2.9	3.33	2.53	2.92	3.08	0.67	2.03	1.92667
TraesCS3D02G540900	8.08	8.63	8.47	8.39333	2.34	4.74	5.95	4.34333	5.93	6.74	7.89	6.85333	0	1.45	6.84	2.76333	4.75	0.49	0.49	1.91
TraesCS5D02G530100	0	0	0	0	0	0	0	0	0	0	0	0	0	0.07	0	0.0233333	0	0.64	5.09	1.91
TraesCS7D02G142900	2.63	2.27	2.42	2.44	2.69	2.43	2.25	2.45667	2.19	2.13	2.06	2.12667	3.09	2.85	3.09	3.01	2.46	0.74	2.52	1.90667
TraesCS5A02G405300	2.6	1.69	2	2.09667	3.03	1.94	1.53	2.16667	2.07	2.32	0.63	1.67333	2.5	2.58	1.9	2.32667	2.44	1.36	1.92	1.90667
TraesCS5D02G506200	3.08	3.45	3.72	3.41667	2.83	2.68	2.34	2.61667	2.05	2.65	2.75	2.48333	2.25	2.75	2.54	2.51333	2.11	0.98	2.62	1.90333
TraesCS5A02G402100	3.75	4.12	4.13	4	3.05	3.14	2.87	3.02	3.14	3.75	3.43	3.44	3.2	3.3	3.43	3.31	2.7	0.5	2.5	1.9
TraesCS5D02G489000	1.92	4.64	3.96	3.50667	3.53	3.11	5.12	3.92	4.71	4.66	2.65	4.00667	1.95	4.8	2.31	3.02	3.8	1.36	0.54	1.9
TraesCS6D02G345700	2.9	2.79	2.83	2.84	3.09	2.8	2.36	2.75	2.35	2.54	2.48	2.45667	2.73	2.89	2.58	2.73333	2.59	1.25	1.86	1.9
TraesCS5D02G501100	3.18	3.18	3.1	3.15333	3.15	2.6	1.83	2.52667	2.28	2.34	0.83	1.81667	3.74	3.59	2.48	3.27	2.71	0.3	2.68	1.89667
TraesCS5D02G549100	2.36	2.8	2.49	2.55	2.45	2.61	2.89	2.65	2.53	2.24	2.08	2.28333	2.77	3.12	3.39	3.09333	2.9	0.92	1.85	1.89
TraesCS5A02G402000	2.63	2.92	2.83	2.79333	2.4	3.22	3.6	3.07333	2.43	2.8	3.02	2.75	2.43	3.15	3.11	2.89667	2.8	0.83	2.04	1.89
TraesCS3D02G535700	3.24	3.25	3.14	3.21	1.6	1.93	0.82	1.45	1.35	1.57	2.59	1.83667	0.96	1.48	1.9	1.44667	2.54	0.49	2.64	1.89
TraesCS5D02G496700	2.64	2.08	2.31	2.34333	2.93	2.15	1.87	2.31667	2.12	1.99	1.4	1.83667	2.88	2.21	2.49	2.52667	2.31	0.71	2.64	1.88667
TraesCS5D02G512100	2.43	2.05	2.3	2.26	2.6	2.39	2.44	2.47667	1.77	2.19	2.02	1.99333	2.76	3	2.94	2.9	2.48	0.93	2.24	1.88333
TraesCS3D02G532300	1.74	3.21	3.02	2.65667	2.75	2.94	1.65	2.44667	1.65	2.7	3.07	2.47333	3.4	3.25	2.35	3	2.92	0.72	1.99	1.87667
TraesCS5D02G528400	3.51	3.67	3.81	3.66333	3.71	3.83	3.81	3.78333	2.3	3.27	3.4	2.99	3.73	4.27	3.9	3.96667	3.53	1.61	0.46	1.86667
TraesCS7A02G135700	1.01	0.95	1.75	1.23667	1.18	3.25	3.17	2.53333	2.58	3.31	5.82	3.90333	1.19	1.99	3.07	2.08333	3.01	0.81	1.78	1.86667
TraesCS5D02G279200	1.94	1.89	1.97	1.93333	2.04	1.96	1.94	1.98	1.23	1.6	1.34	1.39	2.3	2.08	2.35	2.24333	1.98	0.72	2.89	1.86333
TraesCS6D02G378100	1.14	1.21	1.22	1.19	1.83	1.55	1.16	1.51333	0.92	0.85	0.65	0.806667	2.26	2.22	1.9	2.12667	1.82	1.23	2.53	1.86
TraesCS6D02G385400	1.29	1.84	1.83	1.65333	0.83	2.53	3.69	2.35	0.54	0.76	1.94	1.08	1.08	1.75	3.07	1.96667	1.89	0.91	2.75	1.85
TraesCS6D02G352500	2.4	2.21	2.41	2.34	2.84	2.08	1.54	2.15333	1.57	1.82	1.19	1.52667	2.47	2.42	2.32	2.40333	2.02	0.95	2.56	1.84333
TraesCS6D02G384300	0.37	0.35	0.23	0.316667	0.08	0.82	0	0.3	0	0.03	0	0.01	0	0.27	0.02	0.0966667	0.02	0.37	5.14	1.84333
TraesCS6D02G364900	4.75	4.24	4.21	4.4	5.92	3.67	0.2	3.26333	4.22	3.92	0.09	2.74333	6.46	4.16	4.11	4.91	4.8	0.68	0.04	1.84
TraesCS5D02G482600	1.04	0.46	0.32	0.606667	2.44	3.3	1.15	2.29667	1.34	0.67	0.06	0.69	3.59	3.65	4.45	3.89667	4.93	0.56	0	1.83
TraesCS7A02G138600	2.82	2.97	2.82	2.87	3.52	2.97	2.83	3.10667	3.15	2.76	2.05	2.65333	3.1	3.42	2.77	3.09667	2.47	0.66	2.3	1.81
TraesCS7A02G137000	0.97	2.7	2.34	2.00333	1.26	2.96	3.63	2.61667	1.11	2.02	6.85	3.32667	0.04	1.26	3.93	1.74333	4.14	1.03	0.26	1.81
TraesCS5D02G533800	1.86	1.26	1.47	1.53	2.74	2.43	2.65	2.60667	3.52	2.66	2.16	2.78	3.24	3.84	2.84	3.30667	2.85	0.56	2.01	1.80667
TraesCS5D02G283800	1.17	2.23	1.89	1.76333	3.26	3.24	1.61	2.70333	3.24	2.14	4.83	3.40333	4.1	4.31	4.28	4.23	3.55	0.35	1.51	1.80333
TraesCS1A02G027600	0	0.04	0.11	0.05	1.25	0.95	1.16	1.12	0.18	0.64	0.99	0.603333	2.84	2.73	3.34	2.97	2.89	0.67	1.85	1.80333
TraesCS6D02G392900	2.24	2.57	2.57	2.46	2.87	2.52	2.32	2.57	1.72	1.88	1.56	1.72	3.31	2.43	1.73	2.49	0.92	1.32	3.17	1.80333
TraesCS3D02G535600	2.65	2.31	2.67	2.54333	3.65	2.92	4.22	3.59667	5.93	4.72	4.12	4.92333	2.83	2.76	3	2.86333	3.02	0.5	1.87	1.79667
TraesCS5D02G560900	3.72	3.64	3.71	3.69	4.73	4.15	5.32	4.73333	3.35	3.13	0.54	2.34	3.35	5.12	4.17	4.21333	3.06	0.89	1.43	1.79333
TraesCS6D02G389100	2.27	1.81	2.12	2.06667	1.89	1.58	1.91	1.79333	1.79	1.79	2.17	1.91667	2.06	2.31	2.96	2.44333	2.11	0.81	2.44	1.78667
TraesCS5D02G551300	2.04	1.94	1.89	1.95667	2.67	2.06	1.56	2.09667	1.49	1.7	1.35	1.51333	3.17	2.71	2.52	2.8	2.2	0.83	2.32	1.78333
TraesCS5A02G402600	0.96	0.49	0.66	0.703333	4.43	6.03	7.99	6.15	7.86	7.79	7.65	7.76667	3.83	5.29	5.12	4.74667	4.85	0.38	0.11	1.78
TraesCS5A02G400000	3.38	2.76	2.99	3.04333	3.44	2.8	2.44	2.89333	2.75	2.12	2.25	2.37333	3.21	4.41	2.43	3.35	3.03	0.43	1.88	1.78
TraesCS7A02G131800	2.76	2.44	2.32	2.50667	2.84	2.72	2.46	2.67333	2.16	1.88	1.91	1.98333	2.83	2.39	2.92	2.71333	2.32	0.7	2.32	1.78
TraesCS5D02G558500	4.05	4.8	4.95	4.6	4.18	2.98	4.27	3.81	2.88	3.09	2.99	2.98667	1.79	3.46	4.07	3.10667	0.69	1.57	3.07	1.77667
TraesCS5D02G504900	0	0	0	0	0.66	1.64	0.29	0.863333	3.06	2.61	1.08	2.25	1.01	3.15	4.67	2.94333	5.13	0.2	0	1.77667
TraesCS3D02G536900	2.9	2.83	2.83	2.85333	3.41	2.74	1.91	2.68667	2.42	2.55	0.86	1.94333	3.28	2.6	2.64	2.84	2.55	0.73	2.05	1.77667
TraesCS6D02G378700	2.04	2.22	2.19	2.15	2.63	2.34	1.91	2.29333	1.32	1.69	1.32	1.44333	2.96	2.27	2.63	2.62	2.03	0.54	2.76	1.77667
TraesCS7D02G142400	0.05	0.19	0.09	0.11	0	0.1	0.07	0.0566667	0	0	0.03	0.01	0	0.12	0.46	0.193333	0.05	0.4	4.88	1.77667
TraesCS3D02G531800	0	0	0	0	0	0	0	0	0	0	0	0	0	0	0	0	5.33	0	0	1.77667
TraesCS6D02G391300	1.89	1.9	2.01	1.93333	2.27	2.35	2.13	2.25	1.61	1.79	1.13	1.51	2.78	2.49	2.8	2.69	1.98	0.44	2.9	1.77333
TraesCS6D02G344600	2.29	2.64	2.82	2.58333	2.2	2.35	2.35	2.3	1.45	1.68	1.7	1.61	1.94	2.73	2.14	2.27	2.14	0.31	2.86	1.77
TraesCS5A02G404400	1.83	1.81	1.93	1.85667	2.14	2.27	2.29	2.23333	1.55	1.92	1.99	1.82	2.25	2.31	2.96	2.50667	2.38	0.8	2.11	1.76333
TraesCS5D02G500100	1.5	1.68	1.65	1.61	1.91	1.78	2.13	1.94	0.82	1.32	2.13	1.42333	1.48	1.85	2.99	2.10667	1.83	1.05	2.41	1.76333
TraesCS7D02G140400	2.88	3.03	2.89	2.93333	3.81	3.21	2.73	3.25	3.28	2.87	1.76	2.63667	3.34	3.46	2.77	3.19	2.44	1.09	1.75	1.76
TraesCS5D02G532200	1.61	1.89	1.81	1.77	1.02	2.92	0.64	1.52667	0.99	1	2.02	1.33667	2.28	1.86	1.18	1.77333	2.85	1.32	1.11	1.76
TraesCS6B02G058000	0.41	0.03	0.02	0.153333	0.01	0	0.01	0.00666667	0.28	0.01	0	0.0966667	0.68	2.46	0	1.04667	3.71	1.53	0.04	1.76
TraesCS5D02G279400	4.65	3.56	3.49	3.9	3.26	3.45	2.59	3.1	2.46	2.4	3.08	2.64667	3.33	3.41	3.03	3.25667	2.75	0.78	1.73	1.75333
TraesCS6D02G356800	1.71	1.35	1.45	1.50333	2.61	2.87	3.73	3.07	4.17	3.41	3.45	3.67667	2.43	2.71	2.77	2.63667	2.92	0.67	1.63	1.74
TraesCS5D02G562000	2.47	1.72	1.94	2.04333	2.39	1.89	1.02	1.76667	1.61	0.89	0.03	0.843333	1.15	4.32	4.36	3.27667	3.52	0.95	0.74	1.73667
TraesCS6D02G379900	2.7	1.96	2.05	2.23667	1.54	1.61	0.2	1.11667	0.49	0.79	1.05	0.776667	2.1	2	4.35	2.81667	4.21	0.65	0.34	1.73333
TraesCS5D02G519700	2.92	2.84	2.97	2.91	3.29	2.99	2.31	2.86333	2.7	2.34	1.42	2.15333	3.3	3.35	2.78	3.14333	2.68	0.82	1.68	1.72667
TraesCS1A02G023400	1.59	1.41	1.5	1.5	1.95	1.6	1.08	1.54333	1.86	1.4	0.83	1.36333	2.42	1.87	1.64	1.97667	2.61	0.73	1.84	1.72667
TraesCS5A02G393900	1.35	3.19	3.12	2.55333	1.03	1.3	0.61	0.98	0.2	0.29	3.07	1.18667	0.25	0.57	0.78	0.533333	1.32	0.32	3.54	1.72667
TraesCS5D02G478900	1.19	1.15	1.15	1.16333	3.54	3.42	4.8	3.92	6.42	5.21	4.26	5.29667	2.81	3.69	3.26	3.25333	3.37	0.96	0.84	1.72333
TraesCS3D02G537600	2.33	2.15	2.31	2.26333	2.9	2.62	1.63	2.38333	2.41	1.91	1.16	1.82667	3.28	2.09	2.49	2.62	2.62	0.65	1.9	1.72333
TraesCS5D02G486000	2.12	2.08	2.22	2.14	2.33	1.96	1.6	1.96333	1.79	1.67	1.52	1.66	2.62	2.3	2.33	2.41667	2.62	0.85	1.7	1.72333
TraesCS5D02G536200	3.39	2.78	2.61	2.92667	1.78	2.64	1.66	2.02667	3.36	2.17	1.74	2.42333	0.08	1.44	5.05	2.19	3.2	1.95	0	1.71667
TraesCS7D02G142100	2.34	1.92	2.06	2.10667	2.68	2.83	4.9	3.47	0.33	0.39	0.65	0.456667	2.62	4.98	3.89	3.83	1.88	3.14	0.1	1.70667
TraesCS5D02G526300	0.32	1.18	1.42	0.973333	6.92	5.2	0.04	4.05333	0.37	2.75	0	1.04	5.76	3.5	0.92	3.39333	0.27	3.42	1.43	1.70667
TraesCS5D02G519800	2.36	3.66	3.63	3.21667	2.5	3.36	2.02	2.62667	1.81	3.62	3.84	3.09	2.49	2.73	2.26	2.49333	3.38	0.73	1.01	1.70667
TraesCS5D02G541900	0.81	0.32	0.39	0.506667	2.25	2.31	2.1	2.22	1.17	1.12	1.17	1.15333	3.21	3.23	3.39	3.27667	3.18	1.09	0.83	1.7
TraesCS5D02G554400	2.25	2.28	2.32	2.28333	2.58	2.03	1.76	2.12333	1.77	2.05	1.14	1.65333	2.67	1.98	2.58	2.41	2.29	0.52	2.28	1.69667
TraesCS1A02G025700	1.52	0.94	0.98	1.14667	1.36	1.33	0.69	1.12667	0.86	0.77	0.58	0.736667	2.31	1.5	1.91	1.90667	1.46	0.34	3.29	1.69667
TraesCS5D02G487000	2.58	2.62	2.68	2.62667	3.87	3.08	2.45	3.13333	2.84	2.91	1.54	2.43	4.31	3.72	3.44	3.82333	3.15	0.37	1.56	1.69333
TraesCS5D02G485300	1.96	2.91	2.46	2.44333	1.39	2.51	0.72	1.54	1.33	0.91	1.72	1.32	0.62	1.3	2.02	1.31333	2.91	0.27	1.89	1.69
TraesCS3D02G531900	1.12	0.65	0.63	0.8	0.11	2.76	3.31	2.06	2.19	2.5	0.62	1.77	1.18	0.36	1.09	0.876667	0.24	0.12	4.71	1.69
TraesCS3D02G543500	2.85	3.19	3.08	3.04	3.02	2.75	2.28	2.68333	2.42	1.97	1.9	2.09667	3.09	3.7	2.46	3.08333	2.87	0.95	1.24	1.68667
TraesCS1A02G020300	1.59	1.7	1.73	1.67333	2.06	1.71	1.67	1.81333	1.16	1.24	1.1	1.16667	3.13	2.93	2.35	2.80333	2.51	0.96	1.59	1.68667
TraesCS3D02G544100	2.72	3.02	3	2.91333	2.26	2.68	2.71	2.55	1.69	2.34	2.67	2.23333	2.11	2.51	2.55	2.39	2.4	1.39	1.27	1.68667
TraesCS5D02G516700	0.23	0.21	0.34	0.26	3.62	4.26	5.91	4.59667	6.56	5.69	4.55	5.6	3.6	4.49	3.85	3.98	4.5	0.2	0.35	1.68333
TraesCS1A02G024300	0.19	0.57	0.72	0.493333	2.62	3.15	3.24	3.00333	0.72	2.42	1.78	1.64	3.34	2.98	3.4	3.24	3.02	0.69	1.34	1.68333
TraesCS5D02G474900	0	0	0	0	0	0	0	0	0	0	0	0	0	0	0.27	0.09	5.05	0	0	1.68333
TraesCS6D02G360900	0.58	2.44	1.96	1.66	0.7	0.1	0.67	0.49	0.08	0.3	0.63	0.336667	0.4	0.36	0.41	0.39	0.43	0.34	4.27	1.68
TraesCS5A02G400900	2.51	2.11	2.26	2.29333	2.93	2.05	2.07	2.35	3.26	2.61	2.21	2.69333	2.78	2.41	2.21	2.46667	2.37	0.6	2.06	1.67667
TraesCS5D02G534100	1.82	1.88	2	1.9	2.1	1.6	1.48	1.72667	1.27	1.59	1.74	1.53333	2.15	2.1	2.2	2.15	1.8	0.7	2.52	1.67333
TraesCS6D02G384600	0.31	0.77	0.79	0.623333	1.89	2.07	2.23	2.06333	0.88	1.62	1.25	1.25	3	2.96	2.87	2.94333	2.5	0.46	2.05	1.67
TraesCS5D02G506400	2.23	2.15	2.15	2.17667	2.48	2	1.62	2.03333	2.05	1.66	1.49	1.73333	2.19	1.48	2.01	1.89333	2.01	0.45	2.55	1.67
TraesCS5D02G561000	4.04	3.48	3.65	3.72333	4.43	3.39	3.27	3.69667	2.97	2.42	1.02	2.13667	3.61	4.09	2.95	3.55	2.55	1.38	1.07	1.66667
TraesCS5D02G286600	2.19	2.13	2.08	2.13333	3.15	1.69	0.57	1.80333	1.73	1.82	0.05	1.2	3.87	3.4	3.28	3.51667	2.73	0.56	1.71	1.66667
TraesCS6D02G352600	1.34	0.99	1.08	1.13667	1.87	1.44	0.85	1.38667	1.4	1.08	0.26	0.913333	2.41	2.09	1.82	2.10667	1.93	0.35	2.72	1.66667
TraesCS6D02G388700	3.44	3.56	3.47	3.49	2.48	2.51	2.61	2.53333	3.51	2.67	2.85	3.01	1.19	1.26	1.42	1.29	1.93	0.34	2.73	1.66667
TraesCS5D02G496300	1.87	1.68	1.84	1.79667	2.69	2.02	1.37	2.02667	1.84	1.62	1.24	1.56667	3.4	3.04	2.87	3.10333	2.73	0.91	1.35	1.66333
TraesCS5A02G401200	3.05	5.92	5.79	4.92	2.74	4.74	1.37	2.95	1.62	4.79	4.86	3.75667	1.89	1.86	2.49	2.08	2.7	1.27	1.02	1.66333
TraesCS5A02G398700	0.02	0.73	0.47	0.406667	0.1	0.27	0	0.123333	0.16	0.04	0.02	0.0733333	0.47	0.79	1.32	0.86	4.09	0.74	0.13	1.65333
TraesCS5D02G477700	3	3.16	3.3	3.15333	3.05	2.74	2.02	2.60333	1.56	1.73	3.46	2.25	2.82	3.31	4.11	3.41333	3.77	0.8	0.38	1.65
TraesCS6D02G387000	1.98	2.18	2.49	2.21667	2.84	2.3	3.27	2.80333	3.6	2.94	3.29	3.27667	2.58	2.79	2.79	2.72	2.11	0.89	1.94	1.64667
TraesCS6D02G379700	1.96	2.09	2.08	2.04333	2.17	2.32	1.48	1.99	1.6	1.48	1.42	1.5	2.27	2.08	2.39	2.24667	2.27	0.46	2.21	1.64667
TraesCS6D02G386100	1.94	2.27	2.29	2.16667	2.62	2.21	2.21	2.34667	2.28	1.7	1.71	1.89667	2.53	2.42	2.58	2.51	2.28	0.75	1.9	1.64333
TraesCS5D02G538800	1.31	1.48	1.34	1.37667	2.17	2.29	2.55	2.33667	2.71	2.11	2.33	2.38333	2.23	2.33	1.97	2.17667	2.48	1.23	1.22	1.64333
TraesCS5D02G557000	3.6	4.08	3.99	3.89	3.04	2.9	3.46	3.13333	2.67	1.86	2.36	2.29667	1.23	3.18	2.79	2.4	3.17	1.47	0.27	1.63667
TraesCS3D02G532100	2.69	2.16	2.47	2.44	3.21	1.89	0.55	1.88333	1.54	1.51	0.16	1.07	2.9	1.87	1.86	2.21	1.53	0.46	2.92	1.63667
TraesCS5D02G562100	1.91	2.04	1.98	1.97667	2.16	2.27	2.85	2.42667	2.91	2.2	2.22	2.44333	2.17	2.85	3.02	2.68	2.55	0.62	1.72	1.63
TraesCS6D02G360000	3.32	4.03	4.07	3.80667	3.74	3.44	4.37	3.85	2.54	3.05	3.34	2.97667	3.45	4.23	2.81	3.49667	2.9	0.96	1	1.62
TraesCS5D02G506800	0.2	0.89	0.99	0.693333	2.04	1.75	2.31	2.03333	1.68	1.94	2.43	2.01667	2.23	2.64	3.18	2.68333	2.55	0.69	1.62	1.62
TraesCS1A02G023800	3.13	2.94	3.02	3.03	3.04	2.9	3.31	3.08333	2.55	2.22	1.74	2.17	3.18	3.91	3.25	3.44667	3.07	0.56	1.22	1.61667
TraesCS3D02G527900	2.16	2.31	2.26	2.24333	2.52	2.27	1.55	2.11333	1.46	1.92	1.88	1.75333	2.94	2.92	2.34	2.73333	2.61	0.69	1.55	1.61667
TraesCS5D02G517800	1.9	2.08	2.06	2.01333	2.53	1.7	1.15	1.79333	1.48	1.76	1.15	1.46333	2.15	1.81	1.86	1.94	1.7	0.44	2.71	1.61667
TraesCS5D02G519500	0.02	0.06	0.02	0.0333333	0.41	0.44	2.23	1.02667	2.56	2.46	3.61	2.87667	0.06	0.65	1.33	0.68	1.14	0.64	3.07	1.61667
TraesCS7A02G138900	0	0.02	0	0.00666667	0	0	0	0	0	0	0	0	0	0	0	0	2.05	1.99	0.81	1.61667
TraesCS6D02G358300	2.81	1.96	2.54	2.43667	2.58	2.73	2.63	2.64667	2.03	1.52	1.63	1.72667	2.33	2.95	2.99	2.75667	2.75	0.71	1.38	1.61333
TraesCS5D02G493800	2.23	2.3	2.32	2.28333	2.34	2.6	2.12	2.35333	1.89	2.08	1.91	1.96	2.89	2.32	2.64	2.61667	2.46	0.77	1.61	1.61333
TraesCS5A02G395600	3.62	3.43	3.25	3.43333	4.79	3.94	0.52	3.08333	3.05	2.75	0.03	1.94333	4.92	3.76	2.42	3.7	3.16	0.68	0.99	1.61
TraesCS3D02G533000	2.86	2.12	2.2	2.39333	3.23	1.57	0	1.6	2.54	1.79	0.15	1.49333	3.3	1.92	1.28	2.16667	2	2.51	0.32	1.61
TraesCS5D02G479700	2.2	1.56	2.29	2.01667	2.85	4.56	7.03	4.81333	6.73	6.24	6.74	6.57	1.74	3.85	3.73	3.10667	3.86	0.36	0.6	1.60667
TraesCS6D02G379500	1.98	2.05	2.38	2.13667	3.13	2.2	1.26	2.19667	1.49	2.41	1.43	1.77667	3.75	3.27	2.68	3.23333	2.05	0.91	1.85	1.60333
TraesCS7D02G144400	2.69	2.93	2.79	2.80333	2.81	2.97	2.52	2.76667	2.32	2.6	2.57	2.49667	2.97	3.34	2.79	3.03333	2.73	1.07	1.01	1.60333
TraesCS3D02G537100	2.13	2.05	2.07	2.08333	3	2.15	1.78	2.31	1.9	2.11	1.69	1.9	3.05	2.94	2.58	2.85667	2.4	0.61	1.8	1.60333
TraesCS7A02G134100	4.98	4.02	4.15	4.38333	2.47	1.58	0.62	1.55667	3.2	0.62	1.27	1.69667	1.11	1.79	2.69	1.86333	3.58	1.04	0.19	1.60333
TraesCS7A02G132500	1.35	1.64	1.41	1.46667	1.63	1.77	1.55	1.65	0.52	0.92	0.77	0.736667	2.09	1.82	2.32	2.07667	1.64	0.63	2.52	1.59667
TraesCS5D02G541400	0.9	0.64	0.76	0.766667	1.33	2.16	2.92	2.13667	3	3.14	4.25	3.46333	2.74	2.75	3.11	2.86667	3.03	0.45	1.3	1.59333
TraesCS6D02G371900	1.37	1.51	1.47	1.45	2.27	3.12	3.91	3.1	3.84	4.03	4.82	4.23	2.35	2.21	2.93	2.49667	2.54	1.03	1.21	1.59333
TraesCS5D02G493200	2.9	3.25	3.22	3.12333	1.98	2.54	1.18	1.9	1.23	2.27	2.9	2.13333	2.21	1.35	1.61	1.72333	3.71	0.64	0.43	1.59333
TraesCS6D02G378000	0.71	0.65	0.81	0.723333	3.02	6.51	8.2	5.91	3.2	5.83	9.45	6.16	3.69	5.5	6.78	5.32333	2.93	1.59	0.25	1.59
TraesCS6D02G373400	1.82	1.5	1.76	1.69333	2.51	1.07	0.18	1.25333	1.59	1.5	0.19	1.09333	2.86	3.81	2.51	3.06	3.04	0.6	1.12	1.58667
TraesCS4A02G022100	1.76	1.63	1.81	1.73333	3.08	3.06	3.96	3.36667	3.91	3.52	4.06	3.83	2.99	3.69	3.07	3.25	2.8	0.54	1.41	1.58333
TraesCS5A02G395700	2.84	2.78	2.74	2.78667	2.88	2.67	2.4	2.65	1.71	1.73	1.81	1.75	2.99	2.95	2.59	2.84333	2.58	0.54	1.63	1.58333
TraesCS7D02G141600	0	0.01	0.03	0.0133333	0.23	0.58	0	0.27	1.94	0.08	1.23	1.08333	0.37	0.94	0.62	0.643333	0.02	0.8	3.93	1.58333
TraesCS4A02G021700	0.65	0.45	0.38	0.493333	0.11	0.3	0.83	0.413333	0.28	0.9	0.07	0.416667	0.05	0.08	0.42	0.183333	0.1	1.78	2.87	1.58333
TraesCS3D02G529400	2.58	1.84	1.89	2.10333	2.37	1.77	0.94	1.69333	2.27	1.28	0.52	1.35667	1.98	2.74	3.13	2.61667	2.45	0.53	1.75	1.57667
TraesCS1D02G251700	2.25	5.09	4.21	3.85	2.47	2.89	0.31	1.89	3.78	1.5	0.92	2.06667	0.68	0.6	0.11	0.463333	0.33	2.27	2.13	1.57667
TraesCS6D02G344100	4.95	4.27	4.25	4.49	5.72	3.68	0.03	3.14333	3.94	3.75	0.05	2.58	6.56	3.94	4.06	4.85333	3.96	0.66	0.1	1.57333
TraesCS6D02G356100	0.15	0.02	0.05	0.0733333	2.84	4.37	7.42	4.87667	6.38	6.33	7.82	6.84333	1.64	3.9	5.7	3.74667	3.85	0.83	0.04	1.57333
TraesCS3D02G529200	1.59	1.54	1.46	1.53	3.48	2.85	3.99	3.44	5.51	4.3	4.11	4.64	2.57	2.86	3.31	2.91333	2.96	0.83	0.93	1.57333
TraesCS5A02G405000	2.45	1.99	2.11	2.18333	1.91	2.86	2.18	2.31667	1.95	2.23	2.59	2.25667	2.04	2.12	1.88	2.01333	2.67	0.69	1.36	1.57333
TraesCS5D02G480300	3.27	2.73	2.75	2.91667	4.21	2.26	1.47	2.64667	4.39	3.31	1.07	2.92333	4.14	2.7	2.77	3.20333	3.02	0.7	0.99	1.57
TraesCS3D02G538100	0	0	0	0	2.6	1.39	0	1.33	2.61	1.8	0	1.47	2.82	4.31	0.77	2.63333	4.42	0.19	0.1	1.57
TraesCS5D02G282200	2.9	2.24	2.4	2.51333	3.3	1.82	2.25	2.45667	2.16	1.68	1.06	1.63333	2.88	1.56	2	2.14667	2.09	0.19	2.42	1.56667
TraesCS3D02G535400	2.3	1.78	2.01	2.03	2.59	2.11	1.79	2.16333	1.57	1.51	1.02	1.36667	2.47	2.67	2.26	2.46667	2.3	0.67	1.72	1.56333
TraesCS5D02G512600	1.61	1.72	1.69	1.67333	2.05	1.67	1.03	1.58333	1.48	1.54	0.81	1.27667	1.82	1.42	1.66	1.63333	1.48	0.33	2.88	1.56333
TraesCS5D02G538300	0.97	1.69	1.3	1.32	2.45	2.49	3.29	2.74333	4.8	4	3.29	4.03	3.57	4.55	4.01	4.04333	2.95	1.36	0.37	1.56
TraesCS5D02G536700	3.05	2.71	2.74	2.83333	3.5	2.94	2.54	2.99333	2.34	1.87	1.33	1.84667	3.12	3.81	2.78	3.23667	3.01	0.71	0.96	1.56
TraesCS6D02G371500	1.53	1.33	1.39	1.41667	1.83	1.53	0.93	1.43	1.2	1.39	1.13	1.24	2.53	2.31	1.83	2.22333	2.74	0.45	1.49	1.56
TraesCS5D02G488100	0.16	0.56	0.54	0.42	1.74	3.27	5	3.33667	4.52	7.22	4.8	5.51333	1.58	2.69	3.45	2.57333	2.25	2.2	0.22	1.55667
TraesCS1D02G252800	1.2	1.55	1.5	1.41667	1.96	1.93	1.94	1.94333	0.96	1.04	0.94	0.98	2.1	2.15	2.11	2.12	1.69	0.4	2.58	1.55667
TraesCS7D02G146500	1.45	1.35	1.61	1.47	1.59	1.76	1.78	1.71	1.05	1.16	1.59	1.26667	2.18	1.85	2.08	2.03667	1.67	0.53	2.47	1.55667
TraesCS6D02G368700	0.05	0.08	0.03	0.0533333	3.6	3.67	0.17	2.48	3.9	3.17	1.49	2.85333	4.96	4.83	1.41	3.73333	4.33	0.27	0.06	1.55333
TraesCS5D02G549600	1.92	1.95	2.22	2.03	2.8	2.23	1.91	2.31333	1.33	1.68	1.34	1.45	2.86	2.88	2.35	2.69667	2.15	0.68	1.83	1.55333
TraesCS6D02G354000	0	0	0	0	0	0	0	0	0	0	0	0	0	0.01	1.06	0.356667	1.2	1.24	2.2	1.54667
TraesCS6D02G347400	0.21	0.48	0.43	0.373333	0.36	0.78	0.94	0.693333	0.19	0.34	0.21	0.246667	1.55	1.37	2.66	1.86	2.25	0.59	1.79	1.54333
TraesCS6D02G360600	2.66	3.62	3.69	3.32333	3.36	3.75	1.19	2.76667	3.05	2.21	0.48	1.91333	3.65	3.71	2.54	3.3	2.73	0.85	1.04	1.54
TraesCS1A02G030000	0.25	0.03	0.23	0.17	2.88	3.76	5.64	4.09333	6.06	6.19	7.08	6.44333	2.17	3.76	4.69	3.54	3.77	0.55	0.29	1.53667
TraesCS6D02G382300	1.35	1.24	1.39	1.32667	1.77	1.55	1.23	1.51667	1.35	1.17	1.09	1.20333	2.26	1.83	2.56	2.21667	2.1	0.43	2.07	1.53333
TraesCS1A02G026200	3.53	3.7	3.7	3.64333	2.43	4.04	0.56	2.34333	1.19	4.34	5.03	3.52	3.7	2.91	1.43	2.68	3.58	0.67	0.32	1.52333
TraesCS1A02G033200	3.5	4.41	4.49	4.13333	2.19	5.32	4.4	3.97	1.15	4.11	5.03	3.43	0.25	2.36	2.37	1.66	2.06	2.1	0.41	1.52333
TraesCS5D02G525800	0.76	0.79	0.77	0.773333	1.36	1.27	0.92	1.18333	0.65	0.73	0.39	0.59	1.7	1.91	2.01	1.87333	1.38	0.61	2.57	1.52
TraesCS7D02G142300	3.01	3.07	2.95	3.01	1.42	1.55	1.16	1.37667	1.39	0.58	0.29	0.753333	0.27	1.86	3.19	1.77333	3.26	0.33	0.96	1.51667
TraesCS1D02G004100	2.33	2.07	2.05	2.15	2.95	2.03	1.65	2.21	2.14	2.67	2.61	2.47333	3.62	3.31	2.44	3.12333	2.14	0.71	1.69	1.51333
TraesCS6B02G059700	2.89	2.47	3.11	2.82333	2.96	2.6	2.55	2.70333	2.04	2.28	1.42	1.91333	2.83	2.4	2.45	2.56	2.09	0.91	1.54	1.51333
TraesCS6D02G382700	1.58	1.84	1.96	1.79333	2.32	1.57	1.59	1.82667	1.23	1.3	1.16	1.23	2.3	2.2	2.2	2.23333	1.82	0.66	2.06	1.51333
TraesCS4A02G016600	3.92	3.48	3.66	3.68667	4.2	4.3	0.02	2.84	3.48	2.64	0	2.04	3.87	4.47	3.28	3.87333	4.35	0.12	0.06	1.51
TraesCS6D02G365700	0.54	0.04	0.24	0.273333	0	0.41	0.02	0.143333	0.42	0	0	0.14	0	0	0.03	0.01	1.97	2.42	0.14	1.51
TraesCS5D02G484500	0.03	0.07	0.04	0.0466667	2.8	3.28	5.1	3.72667	5.59	5.4	5.31	5.43333	2.16	3.42	3.33	2.97	3.27	1.09	0.14	1.5
TraesCS7D02G145800	1.79	1.93	1.97	1.89667	1.97	1.97	1.85	1.93	1.3	1.27	1.21	1.26	2.43	2.72	2.68	2.61	2.5	0.54	1.45	1.49667
TraesCS5D02G286700	2.09	1.52	1.39	1.66667	1.85	2.6	2.87	2.44	2.16	2.09	2.98	2.41	3.1	3.01	2.98	3.03	1.99	0.27	2.22	1.49333
TraesCS1D02G252700	0	0	0	0	0	0	0	0	0	0	0	0	0	0	0.02	0.00666667	0.31	1.52	2.65	1.49333
TraesCS1A02G030100	0.64	0.54	0.73	0.636667	3.54	3.37	4.4	3.77	6.3	4.42	3.11	4.61	2.89	3.33	2.88	3.03333	3.46	0.28	0.71	1.48333
TraesCS6D02G389200	1.21	1.23	1.25	1.23	1.72	1.12	1.18	1.34	0.85	1.14	0.95	0.98	2.54	2.19	2.39	2.37333	2.02	0.91	1.52	1.48333
TraesCS5D02G482900	0.12	0.13	0.15	0.133333	0.95	0.28	1.1	0.776667	0.34	0.32	0.59	0.416667	1.76	1.58	1.49	1.61	1.52	1.19	1.74	1.48333
TraesCS3D02G531400	4.14	3.89	3.97	4	3.31	3.66	3.18	3.38333	2.98	2.7	2.84	2.84	3.77	3.65	4.04	3.82	3.31	0.59	0.54	1.48
TraesCS1A02G030500	2.06	1.98	2.2	2.08	2.55	1.37	0.74	1.55333	1.38	1.53	0.57	1.16	2.04	1.43	1.82	1.76333	1.6	0.37	2.47	1.48
TraesCS1D02G003800	0.3	0.4	0.47	0.39	1.2	0.54	0.34	0.693333	0.23	0.44	0.24	0.303333	2.67	2.31	1.81	2.26333	1.62	0.78	2.03	1.47667
TraesCS6D02G364800	1.49	1.38	0.99	1.28667	1.54	1.3	2.42	1.75333	2.46	1.8	1.52	1.92667	2.32	2.54	2.84	2.56667	2.06	0.73	1.63	1.47333
TraesCS1A02G024700	1.97	1.46	1.69	1.70667	2.64	1.88	2.8	2.44	4.54	3.59	3.01	3.71333	2.19	2	2.11	2.1	2	0.42	2	1.47333
TraesCS1A02G025900	2.31	2.15	2.29	2.25	2.43	2.22	1.6	2.08333	1.34	1.34	1.02	1.23333	2.63	2.5	2.45	2.52667	1.81	0.54	2.06	1.47
TraesCS3D02G530500	2.32	2.11	2.06	2.16333	2.64	1.51	1.05	1.73333	1.43	1.63	0.6	1.22	2.37	1.24	1.96	1.85667	1.36	0.27	2.78	1.47
TraesCS6D02G370200	2.04	1.03	1.19	1.42	3.39	4.38	6.69	4.82	6.46	6.35	7.54	6.78333	2.83	3.56	4.32	3.57	3.82	0.43	0.14	1.46333
TraesCS7A02G138500	2.42	2.36	2.54	2.44	2.16	2.05	1.68	1.96333	1.21	1.42	1.3	1.31	1.79	1.78	2.12	1.89667	1.75	0.54	2.09	1.46
TraesCS6D02G349000	1.07	1.95	1.98	1.66667	0.92	2.13	3.47	2.17333	1.52	0.31	3.19	1.67333	0.52	1.04	2.37	1.31	1.84	1.59	0.95	1.46
TraesCS5D02G480600	1.35	2.64	2.61	2.2	2.91	3.24	2.44	2.86333	1.62	3.51	4.87	3.33333	3.24	3.9	2.86	3.33333	3.28	0.45	0.64	1.45667
TraesCS5D02G283600	1.57	2.23	2.17	1.99	2.07	2.23	0.26	1.52	1.87	0.76	3.19	1.94	2.93	4.02	1.67	2.87333	0.36	3.53	0.47	1.45333
TraesCS3D02G531200	1.96	1.98	1.91	1.95	2.25	1.89	1.56	1.9	1.39	1.47	1.3	1.38667	2.49	2.02	2.02	2.17667	1.83	0.62	1.9	1.45
TraesCS6D02G391800	0.95	1.54	1.49	1.32667	2.99	2.79	1.81	2.53	1.08	2.09	1.39	1.52	3.19	3.45	3.41	3.35	2.92	0.42	1	1.44667
TraesCS5D02G502900	0.31	0.33	0.24	0.293333	3.54	4.89	6.71	5.04667	6.58	7.33	8.06	7.32333	2.47	3.94	4.63	3.68	3.6	0.73	0	1.44333
TraesCS1D02G250900	3.07	4.13	4.09	3.76333	3.32	2.8	2.48	2.86667	2.62	3.58	4.07	3.42333	3.06	4.04	4.64	3.91333	2.35	0.26	1.71	1.44
TraesCS6D02G357600	3.91	3.42	3.46	3.59667	4.64	3.25	0.08	2.65667	3.5	2.73	0.04	2.09	5.49	2.88	3.22	3.86333	3.82	0.5	0	1.44
TraesCS3D02G529100	3.14	2.39	2.63	2.72	3.85	2.3	1.06	2.40333	2.44	2.17	0.73	1.78	4.58	2.71	2.71	3.33333	3.17	0.39	0.75	1.43667
TraesCS6D02G392300	0.12	0.07	0	0.0633333	3.57	4.06	6.1	4.57667	5.66	6.07	6.3	6.01	2.2	4.38	4.19	3.59	3.81	0.49	0	1.43333
TraesCS3D02G533700	2.96	3.33	3.42	3.23667	3.35	2.91	3.57	3.27667	3.35	2.55	2.47	2.79	2.77	3.58	3.1	3.15	2.71	0.74	0.85	1.43333
TraesCS6D02G364500	1.98	1.75	1.72	1.81667	3.05	1.87	0.71	1.87667	1.2	1.56	0.51	1.09	3.87	2.69	2.05	2.87	2.29	0.96	1.03	1.42667
TraesCS1A02G030900	2.8	2.54	2.87	2.73667	3.1	2.78	2.52	2.8	1.51	1.7	1.88	1.69667	2.44	2.65	1.77	2.28667	2.09	0.7	1.49	1.42667
TraesCS7D02G137200	0.17	0.3	0.23	0.233333	0.29	2.06	3.54	1.96333	1.65	2.12	5.96	3.24333	0.02	0.78	4.12	1.64	3.2	1.01	0.07	1.42667
TraesCS7D02G143500	3.01	3.47	3.4	3.29333	3.54	1.93	0	1.82333	3.71	2.64	0	2.11667	4.71	3.18	2.88	3.59	3.33	0.94	0	1.42333
TraesCS6B02G055800	0.37	0.61	0.64	0.54	1.49	1.35	1.38	1.40667	0.54	1.03	0.89	0.82	2.4	2.65	2.65	2.56667	2.59	0.74	0.94	1.42333
TraesCS5A02G403900	2.5	3.03	2.97	2.83333	3.02	3.12	0.2	2.11333	2.15	2.05	2.03	2.07667	3.25	2.49	1.11	2.28333	2.97	0.99	0.31	1.42333
TraesCS5A02G402500	1.79	2.15	2.21	2.05	1.95	1.65	1.58	1.72667	1.52	1.5	1.24	1.42	2.54	2.51	2.49	2.51333	2.37	0.75	1.12	1.41333
TraesCS5D02G482700	0.99	0.52	0.45	0.653333	1.06	1.76	1	1.27333	0.64	0.27	0	0.303333	2.94	2.2	3.29	2.81	4.02	0.19	0	1.40333
TraesCS6D02G349400	0.94	1.35	1.44	1.24333	0.67	2.39	3.26	2.10667	0.48	1.51	4.9	2.29667	0.32	1.92	3.67	1.97	1.67	0.44	2.1	1.40333
TraesCS5A02G396900	3.83	4.27	4.17	4.09	2.46	3.4	0.74	2.2	1.42	1.57	1.24	1.41	1.93	1.68	2.03	1.88	3.47	0.69	0.04	1.4
TraesCS5D02G514000	1.78	1.64	1.54	1.65333	2.8	1.73	1.64	2.05667	3.42	2.71	1.61	2.58	3.18	2.35	2.31	2.61333	2.38	0.45	1.36	1.39667
TraesCS1A02G033300	3.22	3.2	3.09	3.17	3.02	2.19	1.26	2.15667	2.22	1.35	1.02	1.53	2.45	1.59	1.96	2	1.94	0.77	1.47	1.39333
TraesCS5D02G559100	1.44	1.43	1.55	1.47333	0.81	1.06	1.37	1.08	0.34	0.44	0.66	0.48	1.6	1.89	2.35	1.94667	2.05	0.24	1.87	1.38667
TraesCS5D02G524000	2.69	3.51	4.03	3.41	4.29	4.03	4.77	4.36333	4.02	4.87	4.58	4.49	3.9	4.55	4.29	4.24667	3.14	0.43	0.58	1.38333
TraesCS5D02G525000	0.92	1.08	1.63	1.21	1.81	2.49	2.67	2.32333	0.84	1.32	2.2	1.45333	3.2	3.23	3.25	3.22667	2.8	0.29	1.05	1.38
TraesCS3D02G540000	1.52	1.68	1.63	1.61	1.78	1.66	1.58	1.67333	1.33	1.35	0.69	1.12333	1.91	2.23	1.97	2.03667	1.86	0.86	1.42	1.38
TraesCS5D02G522100	2.17	2.39	2.44	2.33333	1.96	2.34	2.1	2.13333	0.94	1.26	1.84	1.34667	2.86	3.2	3	3.02	2.43	0.19	1.51	1.37667
TraesCS6D02G379400	0.63	1.29	1.3	1.07333	0.89	1.55	1.39	1.27667	0.68	0.83	1.37	0.96	0.55	0.89	1.48	0.973333	1.05	0.17	2.91	1.37667
TraesCS1D02G249700	0.08	0.1	0.03	0.07	2.32	2.36	3.17	2.61667	4.6	3.61	3.29	3.83333	2.92	3.26	2.03	2.73667	3.03	0.54	0.55	1.37333
TraesCS5D02G513600	3.36	3.18	3.36	3.3	5.35	4.14	1.96	3.81667	2.58	2.9	1.61	2.36333	3.54	4.45	2.37	3.45333	2.65	0.59	0.87	1.37
TraesCS5D02G555100	1.33	1.4	1.4	1.37667	1.96	1.24	0.82	1.34	0.89	1.07	0.5	0.82	2.28	1.83	2.13	2.08	1.6	0.49	2.02	1.37
TraesCS6D02G390100	2.64	2.53	2.68	2.61667	1.74	3.49	1.97	2.4	1.5	2.07	3.18	2.25	1.25	1.16	1.85	1.42	0.94	0.73	2.44	1.37
TraesCS6D02G357100	2.3	1.84	1.87	2.00333	2.59	2.01	0.88	1.82667	0.97	1.29	0.76	1.00667	3.75	2.35	2.83	2.97667	2.67	0.42	0.99	1.36
TraesCS4A02G018000	2.04	1.99	1.9	1.97667	2.29	2.73	2	2.34	1.56	2.54	2.12	2.07333	2.66	2.69	2.38	2.57667	2.42	1.03	0.63	1.36
TraesCS6D02G346400	1.37	2.67	2.72	2.25333	2.4	3.05	0.44	1.96333	0.63	4.09	3.04	2.58667	3.14	1.99	0.93	2.02	3.9	0.15	0.02	1.35667
TraesCS5D02G282300	0.18	0.25	0.27	0.233333	1.13	0.5	0.13	0.586667	0.04	0.48	0.01	0.176667	2.05	0.88	1.21	1.38	2.22	1.75	0.1	1.35667
TraesCS6D02G349500	1.76	2.22	2.08	2.02	0.18	2.82	4.62	2.54	0.36	0.87	3.37	1.53333	0.14	1.12	2.83	1.36333	1.45	1.03	1.59	1.35667
TraesCS3D02G538900	3.41	2.03	1.85	2.43	5.01	4.21	3.04	4.08667	6.54	4.23	0.77	3.84667	1.69	2.98	1.85	2.17333	3.35	0.19	0.52	1.35333
TraesCS6B02G052700	0	0	0	0	0	0	0	0	0	0	0	0	0	0	0.46	0.153333	4.06	0	0	1.35333
TraesCS1D02G000400	3.35	2.82	3.24	3.13667	2.37	4.06	5	3.81	4.12	3.78	3.42	3.77333	1.09	3.73	5.15	3.32333	3.34	0.68	0	1.34
TraesCS5D02G481900	1.97	2.28	1.99	2.08	1.61	2.27	2.33	2.07	1.53	1.37	1.65	1.51667	1.54	1.3	1.77	1.53667	1.17	0.36	2.49	1.34
TraesCS5D02G479300	0.47	7.29	7.2	4.98667	0	0.35	0	0.116667	0	0	0.38	0.126667	0	0	0	0	0	0	3.99	1.33
TraesCS6D02G362000	1.24	1.06	1.28	1.19333	3.35	2.3	2.81	2.82	5.24	3.52	1.89	3.55	2.94	2.26	2.26	2.48667	2.27	0.71	1	1.32667
TraesCS7D02G147800	2.17	2.13	2.22	2.17333	1.72	2.02	3.11	2.28333	2.23	2.12	2.03	2.12667	2.1	2.4	2.83	2.44333	2.29	0.62	1.07	1.32667
TraesCS5A02G400400	3.36	2.94	2.97	3.09	3.05	3.01	2.76	2.94	2.22	2.07	1.94	2.07667	2.47	2.84	2.53	2.61333	1.99	0.35	1.63	1.32333
TraesCS5D02G516300	3.66	3.68	3.85	3.73	2.84	3.7	2.75	3.09667	3.46	2.35	2.42	2.74333	3.06	2.69	2.1	2.61667	2.65	1.26	0.05	1.32
TraesCS5D02G285200	1.32	1.46	1.58	1.45333	2.2	1.67	1.59	1.82	1.23	1.53	1.54	1.43333	2.5	2.48	2.05	2.34333	1.68	0.78	1.48	1.31333
TraesCS4A02G025900	0.99	0.9	1.11	1	0.87	1.01	1.37	1.08333	0.73	0.7	0.95	0.793333	1.29	1.49	1.72	1.5	1.14	0.25	2.54	1.31
TraesCS4A02G017000	3.62	5.41	5.45	4.82667	3.54	4.98	0.68	3.06667	2.69	4.36	4.85	3.96667	2.18	1.35	1.97	1.83333	2.57	1.19	0.16	1.30667
TraesCS6D02G348900	0.95	0.73	0.93	0.87	0.52	1.17	2.29	1.32667	1.03	0.17	0.38	0.526667	0.19	0.67	1.15	0.67	1.77	1.52	0.6	1.29667
TraesCS5D02G477100	0	0.1	0.05	0.05	0	0.01	0.47	0.16	1.58	0.13	1.15	0.953333	0.01	0.03	0.1	0.0466667	3.85	0.04	0	1.29667
TraesCS6B02G056100	0.9	0.52	0.67	0.696667	3.16	2.68	3.79	3.21	5.47	4.43	3.62	4.50667	2.27	2.76	2.57	2.53333	2.57	0.35	0.96	1.29333
TraesCS5D02G483200	2.08	1.57	1.78	1.81	2.61	1.89	1.21	1.90333	1.38	1.4	0.42	1.06667	1.95	1.8	1.84	1.86333	2.26	0.25	1.37	1.29333
TraesCS4A02G025300	0.04	0.1	0.04	0.06	1.27	0.33	0	0.533333	2.89	1.1	0	1.33	1.51	2.71	4.34	2.85333	2.86	0.1	0.91	1.29
TraesCS5D02G476300	1.59	1.57	1.79	1.65	2.52	1.95	2.05	2.17333	2.59	2.11	1	1.9	2.25	2.67	2.54	2.48667	2.11	0.78	0.98	1.29
TraesCS5D02G498200	1.07	1.05	1	1.04	2.58	2.79	3.38	2.91667	4.08	3.48	2.88	3.48	1.84	2.61	2.85	2.43333	2.55	0.33	0.98	1.28667
TraesCS5D02G497200	1.13	1.13	1.13	1.13	2.6	2.53	3.32	2.81667	4.02	3.42	3.71	3.71667	2.35	2.14	2.8	2.43	2.54	0.2	1.12	1.28667
TraesCS5D02G551100	1.87	1.64	1.89	1.8	1.79	1.57	2.34	1.9	1.08	1.28	1.7	1.35333	2.05	1.94	2.51	2.16667	1.31	0.74	1.81	1.28667
TraesCS5D02G538400	0.84	1.6	0.92	1.12	2.12	2.62	0.83	1.85667	1.33	1.6	1.28	1.40333	2.24	2.75	2.95	2.64667	2.4	0.29	1.15	1.28
TraesCS5D02G280600	2.75	2.32	2.5	2.52333	2.8	2.1	0.64	1.84667	1.85	1.54	0.39	1.26	3.6	2.43	1.86	2.63	2.08	0.42	1.34	1.28
TraesCS5A02G396300	0.46	0.53	0.7	0.563333	0.97	0.83	1.07	0.956667	1	0.98	0.83	0.936667	1.37	1.25	1.25	1.29	0.95	0.48	2.41	1.28
TraesCS6D02G396300	2.52	2.69	2.68	2.63	2.14	2.75	3.55	2.81333	1.14	1.44	3.34	1.97333	1.65	2.15	2.67	2.15667	1.21	0.42	2.2	1.27667
TraesCS3D02G530000	1.51	1.5	1.51	1.50667	1.93	1.32	1.18	1.47667	1.01	1.4	1.35	1.25333	2.15	2.09	1.84	2.02667	1.62	0.71	1.5	1.27667
TraesCS5D02G490700	2.04	4.32	4.39	3.58333	2	2.89	0.04	1.64333	0.7	1.18	2.23	1.37	2.28	2.33	0.61	1.74	3.29	0.54	0	1.27667
TraesCS6D02G362400	2.2	1.67	1.76	1.87667	2.09	2.22	1.47	1.92667	2.3	1.53	1.21	1.68	1.11	1.52	1.72	1.45	2.09	0.34	1.4	1.27667
TraesCS7A02G132400	2.01	1.58	1.83	1.80667	2.33	1.57	1.27	1.72333	1.33	1.67	0.8	1.26667	2.1	1.68	1.97	1.91667	1.53	0.26	2.03	1.27333
TraesCS7A02G133400	1.8	1.47	1.46	1.57667	2.08	1.82	1.96	1.95333	1.3	1.38	1.58	1.42	1.82	1.67	1.84	1.77667	1.83	0.63	1.36	1.27333
TraesCS6D02G392700	1.43	1.56	1.56	1.51667	2.06	1.56	1.28	1.63333	1.15	1.47	1.08	1.23333	2.25	1.94	2.11	2.1	1.78	0.36	1.67	1.27
TraesCS7A02G133300	2.6	3.08	2.95	2.87667	1.8	2	4.02	2.60667	2.59	2.3	4.71	3.2	1.56	2.32	3.65	2.51	2.78	0.54	0.48	1.26667
TraesCS1D02G248600	3.27	2.54	2.63	2.81333	3.65	1.62	0.06	1.77667	2.46	1.81	0.17	1.48	3.96	2.81	1.87	2.88	3.05	0.55	0.19	1.26333
TraesCS5D02G533600	0.11	0.11	0.1	0.106667	0.1	0.03	0.03	0.0533333	0.05	0.04	0.07	0.0533333	1.96	2.79	2.85	2.53333	3.2	0.51	0.08	1.26333
TraesCS4A02G026300	0.4	0.6	0.72	0.573333	1.87	2.14	1.61	1.87333	0.92	1.32	1.08	1.10667	2.78	2.75	1.97	2.5	3.29	0.21	0.29	1.26333
TraesCS5D02G538500	0	0	0	0	1.76	3.05	0.12	1.64333	3.34	1.75	0.15	1.74667	0.4	1.99	3.71	2.03333	3.65	0.09	0.04	1.26
TraesCS6D02G386600	1.51	1.17	1.65	1.44333	1.34	1.76	1.47	1.52333	1.06	1.36	1.32	1.24667	1.26	1.43	1.97	1.55333	1.68	0.55	1.54	1.25667
TraesCS6D02G365400	0.44	0.89	0.69	0.673333	0.48	2.06	2.29	1.61	0.1	0.43	1.28	0.603333	0.31	0.59	1.78	0.893333	3.46	0.27	0.04	1.25667
TraesCS5A02G396500	2.37	2.49	2.65	2.50333	2.93	2.52	2.53	2.66	1.47	1.88	1.38	1.57667	3.13	3.49	2.7	3.10667	1.56	0.47	1.73	1.25333
TraesCS6D02G358000	1.81	2.15	2.11	2.02333	1.93	2.01	1.66	1.86667	1.88	1.96	1.27	1.70333	2.35	2.07	2.17	2.19667	1.43	0.71	1.62	1.25333
TraesCS5D02G477800	2.27	2.48	2.47	2.40667	1.35	2.39	2.83	2.19	1.09	1.21	2.21	1.50333	1.04	1.62	3.1	1.92	2.41	0.4	0.95	1.25333
TraesCS5D02G536000	2.05	2.43	1.98	2.15333	1.78	1.82	1.01	1.53667	1.71	1.43	1.34	1.49333	1.75	1.68	1.79	1.74	1.85	0.58	1.33	1.25333
TraesCS4A02G017400	0.81	3.07	3.25	2.37667	0.66	0.59	0.03	0.426667	0.19	4.35	5.5	3.34667	0.04	0.15	0.43	0.206667	0.17	0.23	3.36	1.25333
TraesCS3D02G539800	2.41	3.03	2.96	2.8	2.76	2.89	2.09	2.58	1.52	1.82	1.74	1.69333	3.17	2.72	3.11	3	2.84	0.1	0.81	1.25
TraesCS5D02G495600	1.51	1.96	1.78	1.75	2	1.49	1	1.49667	1	1.65	0.67	1.10667	2.01	1.01	1.72	1.58	1.47	0.21	2.07	1.25
TraesCS5D02G474000	1.58	2.09	2.09	1.92	1.92	2.37	2.11	2.13333	2.36	2.91	2.06	2.44333	3.09	2.05	1.87	2.33667	3.59	0.11	0.02	1.24
TraesCS5D02G528700	1.28	1.6	1.57	1.48333	1.4	1.41	1.37	1.39333	0.62	1.12	1.48	1.07333	2.19	2.04	1.6	1.94333	1.96	0.57	1.19	1.24
TraesCS3D02G542300	2.85	3.54	3.64	3.34333	2.53	3.1	3.27	2.96667	3.02	3.58	3.83	3.47667	1.78	2.71	2.72	2.40333	2.51	0.33	0.87	1.23667
TraesCS5A02G395300	0.1	0.2	0.14	0.146667	1.25	1.59	1.92	1.58667	1.06	1.29	2.55	1.63333	1.75	2.23	3.48	2.48667	2.43	0.45	0.82	1.23333
TraesCS4A02G023800	1.83	2.02	1.88	1.91	2.56	2.4	2.63	2.53	2.58	2.01	2.62	2.40333	2.46	2.27	2.69	2.47333	2.49	0.57	0.62	1.22667
TraesCS5D02G529600	1.3	1.27	1.5	1.35667	1.62	1.34	1.81	1.59	2.06	2.81	2.79	2.55333	1.6	1.53	1.24	1.45667	1.54	0.42	1.72	1.22667
TraesCS3D02G541100	1.9	1.19	1.12	1.40333	1.82	1.39	1.02	1.41	0.9	0.83	1.14	0.956667	1.67	1.72	1.19	1.52667	2.02	0.2	1.45	1.22333
TraesCS6D02G370300	2.89	2.29	2.52	2.56667	1.9	1.83	1.41	1.71333	0.89	1.13	0.89	0.97	2.61	2.25	2.37	2.41	1.75	0.4	1.5	1.21667
TraesCS5D02G489200	2.62	2.73	2.85	2.73333	1.79	1.63	0.61	1.34333	1.83	1.9	2.15	1.96	0.65	1.75	1.06	1.15333	2.62	0.31	0.72	1.21667
TraesCS4A02G026600	0.02	0.09	0.02	0.0433333	2.64	2.2	0.42	1.75333	0.86	0.89	0.03	0.593333	4.95	4	2.12	3.69	3.46	0.16	0.01	1.21
TraesCS7D02G142800	2.18	3.11	3.05	2.78	2.53	2.46	2.07	2.35333	0.96	1.79	1.31	1.35333	2.15	2.48	2.26	2.29667	1.57	0.48	1.58	1.21
TraesCS6D02G360300	1.51	1.29	1.25	1.35	1.44	1.32	1.04	1.26667	0.8	0.99	1.21	1	1.7	1.35	1.76	1.60333	1.42	0.33	1.88	1.21
TraesCS6D02G362900	1.2	2.65	2.62	2.15667	1.38	0.62	1.06	1.02	0.85	0.95	0.64	0.813333	0.19	0.54	2.6	1.11	3.46	0.17	0	1.21
TraesCS5D02G278700	3.19	2.45	2.48	2.70667	2.95	2.75	2.52	2.74	1.97	1.81	0.28	1.35333	2.37	2.39	1.26	2.00667	2.57	0.46	0.59	1.20667
TraesCS6D02G381500	0.74	0.79	0.76	0.763333	0.97	1.15	1	1.04	0.54	0.73	0.54	0.603333	1.38	1.44	1.75	1.52333	1.06	0.29	2.27	1.20667
TraesCS5D02G516900	4.17	4.54	4.49	4.4	3.4	4.28	1.92	3.2	2.1	3.55	3.82	3.15667	3.5	3.13	1.21	2.61333	2.98	0.63	0	1.20333
TraesCS6D02G376300	0	0.1	0	0.0333333	0.97	0.59	1.62	1.06	0	0.46	0.44	0.3	1.62	2.21	2.51	2.11333	1.65	0.74	1.21	1.2
TraesCS4A02G020200	1.57	1.23	1.52	1.44	1.6	1.66	1.11	1.45667	1.19	1.22	1.06	1.15667	2.33	2.14	1.81	2.09333	2.09	0.26	1.25	1.2
TraesCS4A02G017700	0.86	3.38	3.68	2.64	1.71	0.76	1.96	1.47667	1.07	2.28	5.15	2.83333	0.64	1.56	2.7	1.63333	0.86	0.24	2.48	1.19333
TraesCS6D02G380400	1.42	1.9	1.82	1.71333	1.71	1.58	1.5	1.59667	2.12	1.12	1.5	1.58	1.93	1.35	1.6	1.62667	2.01	0.62	0.95	1.19333
TraesCS6D02G352200	2.49	2.62	2.55	2.55333	2.33	3.24	1.88	2.48333	2.02	2.59	2.36	2.32333	2.43	2.79	2.9	2.70667	2.16	0.5	0.91	1.19
TraesCS6D02G372000	0.04	0	0.01	0.0166667	4.93	4.32	0	3.08333	6.08	5.33	0	3.80333	3.27	5.98	2.01	3.75333	3.36	0.18	0	1.18
TraesCS5A02G396700	0.48	0.42	0.61	0.503333	1.97	2.18	4.18	2.77667	5.54	4.11	3.41	4.35333	1.97	2.46	2.79	2.40667	2.65	0.16	0.73	1.18
TraesCS4A02G028000	0.78	1.11	1.1	0.996667	0.82	1.47	1.66	1.31667	0.93	1.16	0.92	1.00333	1.2	1.5	1.96	1.55333	1.19	0.33	2.02	1.18
TraesCS1D02G250200	0	0	0	0	0	0	0	0	0	0	0	0	0.01	0	0.06	0.0233333	3.28	0.25	0	1.17667
TraesCS4A02G016700	0.38	0.73	0.46	0.523333	2.42	3.4	5.17	3.66333	5.74	5.52	5.33	5.53	2.01	2.8	3.23	2.68	2.97	0.12	0.43	1.17333
TraesCS5D02G553000	0	0	0	0	0	0.01	0.21	0.0733333	0	0.01	0	0.00333333	0.04	0	0.03	0.0233333	1.15	2.35	0	1.16667
TraesCS7A02G131400	1.67	1.28	1.4	1.45	3.29	2.96	0.92	2.39	2.09	1.95	0.28	1.44	4.09	4.36	2.94	3.79667	2.69	0.36	0.44	1.16333
TraesCS5D02G500300	0.47	0.6	0.65	0.573333	2	1.45	1.68	1.71	3.69	2.38	1.83	2.63333	1.55	1.58	1.8	1.64333	1.3	0.18	2.01	1.16333
TraesCS1D02G004400	1.45	1.48	1.8	1.57667	2.22	2.41	3.05	2.56	3.98	2.91	3.06	3.31667	2.09	1.96	2.55	2.2	1.62	0.23	1.63	1.16
TraesCS5D02G507500	2.21	3.4	3.03	2.88	0.42	0.87	0.22	0.503333	0.17	0.19	0.51	0.29	1.1	0.37	3.11	1.52667	1.53	0.44	1.51	1.16
TraesCS5D02G536900	1.84	1.48	1.68	1.66667	2.4	2.39	2.82	2.53667	2.71	2.2	2.18	2.36333	2.62	2.83	2.89	2.78	2.54	0.32	0.61	1.15667
TraesCS3D02G541800	1.31	1.29	1.32	1.30667	1.74	1.15	1.07	1.32	1.08	1.03	0.86	0.99	1.95	1.79	2.03	1.92333	1.33	0.64	1.5	1.15667
TraesCS1D02G004300	2.59	2.49	2.57	2.55	3.43	2.51	2.18	2.70667	2.25	1.82	0.9	1.65667	3.31	3.18	2.44	2.97667	2.28	0.54	0.64	1.15333
TraesCS5D02G484800	1.6	1.44	1.57	1.53667	2.79	2.04	1.63	2.15333	1.67	1.81	1.02	1.5	2.87	3.22	2.22	2.77	2.21	0.36	0.89	1.15333
TraesCS6D02G353100	0.7	0.6	0.73	0.676667	1.39	0.71	0.59	0.896667	0.66	1.08	0.53	0.756667	1.31	1.24	1.28	1.27667	0.93	0.25	2.27	1.15
TraesCS4A02G025500	3.32	2.98	2.71	3.00333	3.38	3.11	4.27	3.58667	2.21	1.65	2.88	2.24667	3.73	3.4	3.54	3.55667	2.82	0.41	0.21	1.14667
TraesCS5D02G474200	0.03	0	0.02	0.0166667	1.74	3.18	6.21	3.71	6.49	5.58	6.05	6.04	1.46	2.63	3.39	2.49333	3.27	0.17	0	1.14667
TraesCS6D02G350900	0.56	1.3	1.18	1.01333	0.28	0.57	1.11	0.653333	0.34	0.49	1.12	0.65	0.58	1.32	1.79	1.23	2.14	0.42	0.88	1.14667
TraesCS1A02G033800	1.98	1.35	1.37	1.56667	2.15	2.24	1.88	2.09	1.66	1.21	0.72	1.19667	2.35	2.58	2.43	2.45333	2.11	0.38	0.93	1.14
TraesCS5D02G489100	3.31	2.8	3.12	3.07667	2.36	3.32	1.67	2.45	1.13	2.87	2.16	2.05333	2.45	2.3	2.05	2.26667	2.33	0.53	0.56	1.14
TraesCS1D02G250000	1.45	2.09	1.6	1.71333	1.14	1.94	1.34	1.47333	0.65	1.28	1.86	1.26333	2.07	2.04	2.12	2.07667	2.11	0.64	0.65	1.13333
TraesCS4A02G017600	1.26	1.9	2.08	1.74667	1.78	2.14	2.41	2.11	1.98	2.07	2.25	2.1	2.04	1.94	2.16	2.04667	1.66	0.4	1.34	1.13333
TraesCS7D02G135800	0.51	0.36	0.6	0.49	0.42	1.62	2.12	1.38667	1.65	2.12	4.58	2.78333	0.98	1.13	1.96	1.35667	1.92	0.44	1.02	1.12667
TraesCS5D02G281100	1.68	1.66	1.66	1.66667	2.16	2.04	1.8	2	1.06	1.02	0.53	0.87	2.5	2.35	2.27	2.37333	2.16	0.44	0.77	1.12333
TraesCS1A02G026400	1.94	1.52	1.61	1.69	3.07	2.56	1.3	2.31	1.35	1.29	1.43	1.35667	2.97	2.85	2.23	2.68333	2.32	0.34	0.69	1.11667
TraesCS7A02G135800	1.3	1.1	1.23	1.21	1.66	1.74	2	1.8	1.24	1.2	1.08	1.17333	2.03	2.43	2.53	2.33	1.95	0.57	0.83	1.11667
TraesCS5D02G540200	0	0.01	0	0.00333333	0.01	0	0	0.00333333	0	0	0	0	0.8	0.99	2.03	1.27333	2.14	0.67	0.53	1.11333
TraesCS5D02G529500	1.93	2.26	2.42	2.20333	0.61	1.44	1.65	1.23333	0.88	1.46	1.83	1.39	0.19	0.96	2.51	1.22	1.85	0.38	1.11	1.11333
TraesCS1A02G013800	4.09	4.41	4.42	4.30667	4.27	4.29	3.56	4.04	3.61	3.28	4.33	3.74	3.81	4.07	2.1	3.32667	1.62	0.5	1.21	1.11
TraesCS5D02G553400	1.39	2.01	1.51	1.63667	1.71	1.76	0.79	1.42	0.63	0.98	0.65	0.753333	1.73	1.54	1.81	1.69333	1.62	0.51	1.2	1.11
TraesCS5D02G491200	1.85	2.68	2.43	2.32	0.74	2.27	0.51	1.17333	0.33	1.41	3.93	1.89	0.75	0.89	1.22	0.953333	2.64	0.68	0	1.10667
TraesCS5D02G513100	5.04	2.88	3.12	3.68	4.9	4.36	0	3.08667	0.05	0.14	0	0.0633333	0.03	0.01	0.03	0.0233333	0	0.67	2.65	1.10667
TraesCS4A02G019200	0.76	0.98	0.86	0.866667	1.42	0.84	0.71	0.99	0.64	0.63	0.78	0.683333	2.16	1.66	2.2	2.00667	1.63	0.3	1.37	1.1
TraesCS5A02G399900	1.04	0.89	1.16	1.03	1.15	1.5	1.24	1.29667	0.77	0.69	0.86	0.773333	1.53	1.59	1.5	1.54	1.34	0.16	1.78	1.09333
TraesCS1A02G028900	1.2	0.96	1.06	1.07333	3.6	3.11	0.77	2.49333	1.35	1.88	0.5	1.24333	4.17	4.57	2.61	3.78333	3.08	0.03	0.15	1.08667
TraesCS6D02G368500	0	0	0	0	0	0	0	0	0	0	0	0	0	0	1.95	0.65	3.24	0	0	1.08
TraesCS5D02G522700	1.88	1.68	1.83	1.79667	2.31	1.94	1.99	2.08	1.32	1.74	1.71	1.59	2.93	2.39	2.52	2.61333	2.25	0.28	0.7	1.07667
TraesCS3D02G538400	2.65	2.48	2.65	2.59333	2.48	2.68	3.05	2.73667	1.78	1.51	0.93	1.40667	2	3.08	2.4	2.49333	2.36	0.13	0.72	1.07
TraesCS5A02G396400	1.35	1.49	1.6	1.48	1.86	1.29	1.98	1.71	1.42	1.67	2.34	1.81	1.91	2.22	2.15	2.09333	0.78	0.66	1.77	1.07
TraesCS1A02G013700	0.91	1.29	1.47	1.22333	1.75	1.75	1.83	1.77667	1.3	1.61	1.46	1.45667	2.02	2.04	1.89	1.98333	1.79	0.61	0.81	1.07
TraesCS5D02G522200	0.13	0.03	0.13	0.0966667	0.3	0.49	0.43	0.406667	0.12	0.24	0.22	0.193333	0.79	0.95	1.09	0.943333	1.12	0.12	1.96	1.06667
TraesCS5D02G530700	1.68	1.64	1.81	1.71	1.76	1.71	1.46	1.64333	1.25	1.54	1.44	1.41	1.81	1.9	2.08	1.93	1.49	0.52	1.18	1.06333
TraesCS7D02G146600	0.55	0.7	0.84	0.696667	1.88	1.36	2.62	1.95333	2.98	2.7	2.26	2.64667	1.67	1.8	1.88	1.78333	1.11	0.26	1.82	1.06333
TraesCS6D02G388100	1.25	1.18	1.3	1.24333	1.45	1.24	1.05	1.24667	0.78	1.11	0.99	0.96	1.52	1.51	1.44	1.49	1.04	0.29	1.86	1.06333
TraesCS5D02G554300	1.21	2.89	2.65	2.25	0.67	1.61	2.88	1.72	2.15	1.39	2.49	2.01	1.22	1.82	2.78	1.94	2.66	0.52	0	1.06
TraesCS5D02G491800	0.79	0.72	0.57	0.693333	0	0	0	0	0	0	0	0	0	0.1	0.72	0.273333	3.17	0	0	1.05667
TraesCS6D02G363400	2.51	1.93	1.99	2.14333	3.08	1.14	0.01	1.41	2.26	1.59	0.09	1.31333	3.58	2.24	1.49	2.43667	2.63	0.37	0.16	1.05333
TraesCS4A02G016900	1.56	1.23	1.26	1.35	2.02	1.75	2.24	2.00333	1.82	1.84	1.69	1.78333	1.98	2.15	2.23	2.12	2.03	0.31	0.82	1.05333
TraesCS5D02G482200	1.69	1.34	1.47	1.5	2.7	1	0.52	1.40667	1.05	1.67	0.47	1.06333	2.22	1.41	1.47	1.7	1.36	0.23	1.57	1.05333
TraesCS5D02G491600	1.77	3.49	3.22	2.82667	1.09	1.8	0.38	1.09	0.3	1.18	6.05	2.51	0.26	0.23	1.36	0.616667	2.07	0.42	0.66	1.05
TraesCS7A02G137800	0	0.16	0.15	0.103333	0	0.01	0	0.00333333	0	0	0	0	1.88	2.28	2.83	2.33	3.01	0.13	0	1.04667
TraesCS5D02G531100	1.76	1.62	1.75	1.71	1.8	1.77	1.87	1.81333	1.28	1.56	1.37	1.40333	2.38	2.32	2.16	2.28667	1.67	0.36	1.11	1.04667
TraesCS6D02G346700	1.81	2.33	2.34	2.16	1.81	1.66	1.69	1.72	1.48	1.41	1.47	1.45333	1.59	2.47	2.36	2.14	2.59	0.4	0.15	1.04667
TraesCS7D02G148600	0.86	2.22	2.2	1.76	3.53	3.46	2.25	3.08	1.55	2.11	1.99	1.88333	2.35	2.73	1.88	2.32	1.38	0.48	1.27	1.04333
TraesCS6B02G059600	0.9	1.32	0.98	1.06667	1.56	1.03	1.19	1.26	1.37	0.96	0.74	1.02333	2.02	1.84	2.1	1.98667	1.64	0.51	0.97	1.04
TraesCS1A02G030700	0.94	1.29	1.26	1.16333	2.05	1.49	2.18	1.90667	2.43	3.14	3.24	2.93667	1.3	1.84	2.61	1.91667	2.25	0.56	0.31	1.04
TraesCS1A02G013600	2.48	2.61	2.36	2.48333	5.01	4.74	0	3.25	5.52	4.71	0	3.41	4.75	4.09	2.36	3.73333	2.74	0.12	0.24	1.03333
TraesCS3D02G530300	1.94	3.23	3.35	2.84	3.72	2.72	3.13	3.19	1.08	1.14	2.4	1.54	0.89	2.97	3.23	2.36333	1.85	1.01	0.24	1.03333
TraesCS5D02G485800	4.06	4.74	4.63	4.47667	5.83	4.54	6.19	5.52	4.15	3.6	0.03	2.59333	3.65	6.71	3.22	4.52667	2.84	0.25	0	1.03
TraesCS5D02G559400	0.06	0.08	0.08	0.0733333	1.28	1.9	3.25	2.14333	3.08	4.74	3.27	3.69667	0.67	1.85	1.77	1.43	1.15	1.87	0.07	1.03
TraesCS5D02G504800	0	0.84	0.55	0.463333	0	0.04	0.13	0.0566667	0	0	0.35	0.116667	0.01	0.13	0.11	0.0833333	0	0.01	3.08	1.03
TraesCS1D02G248800	3.7	3.85	3.9	3.81667	4.2	3	2.56	3.25333	3.16	2.79	1.54	2.49667	3.64	3.68	2.45	3.25667	1.88	0.51	0.69	1.02667
TraesCS4A02G027200	0	0	0	0	0	0	0	0	0	0	0	0	0.08	0	0	0.0266667	3.07	0	0	1.02333
TraesCS1A02G014000	0	0	0	0	0	0	0	0	0	0	0	0	0	0	0	0	0	1.97	1.1	1.02333
TraesCS4A02G027700	2.07	2.71	2.67	2.48333	1.36	3.73	2.05	2.38	1.79	5.99	7.28	5.02	2.46	1.5	3.7	2.55333	2.39	0.32	0.35	1.02
TraesCS5D02G505100	0.06	0.13	0.17	0.12	0.71	0.59	0.81	0.703333	0.11	0.3	0.22	0.21	2.08	2.44	3.07	2.53	2.87	0.12	0.07	1.02
TraesCS5D02G557600	0.89	1.05	1.03	0.99	1.69	1.49	1.46	1.54667	1.3	1.45	0.94	1.23	2.17	2.52	1.99	2.22667	1.81	0.33	0.92	1.02
TraesCS4A02G018800	0.39	0.46	0.28	0.376667	0.64	0.28	0.17	0.363333	0.78	0.36	0.04	0.393333	1.7	1.2	1.74	1.54667	1.14	0.25	1.66	1.01667
TraesCS6D02G371600	0.58	0.55	0.69	0.606667	1.42	1.75	0	1.05667	0.26	0.68	0.04	0.326667	1.92	0.52	0.19	0.876667	1.2	0.13	1.72	1.01667
TraesCS6D02G396700	0.03	0.08	0.12	0.0766667	1.09	1.24	2.56	1.63	1.34	2.38	1.83	1.85	0.74	4.45	2.47	2.55333	2.99	0.05	0	1.01333
TraesCS3D02G533600	1.53	1.65	1.72	1.63333	2.19	1.98	1.46	1.87667	1.1	1.1	0.68	0.96	2.1	2.02	1.57	1.89667	1.31	0.19	1.54	1.01333
TraesCS5A02G393700	0.81	0.41	0.54	0.586667	1.34	0.5	0.09	0.643333	0.22	0.42	0.15	0.263333	2.3	1.25	1.14	1.56333	0.97	0.42	1.64	1.01
TraesCS6D02G356700	0.7	1.35	0.68	0.91	1.78	1.54	3.54	2.28667	4.76	3.08	3.13	3.65667	0.92	1.78	1.32	1.34	1.59	0.23	1.21	1.01
TraesCS5D02G522400	1.84	1.66	1.74	1.74667	1.62	3.19	4.14	2.98333	1.58	1.86	3.49	2.31	0.91	1.61	2.13	1.55	1.81	0.21	1	1.00667
TraesCS6B02G054600	1.22	1.01	0.87	1.03333	2.08	1.32	0.74	1.38	1.12	1.08	0.07	0.756667	3.02	2.21	2.87	2.7	2.36	0.25	0.4	1.00333
TraesCS6D02G380200	2.19	2.28	2.19	2.22	1.82	2.39	2.37	2.19333	1.29	2.12	2.36	1.92333	2.17	1.85	1.72	1.91333	1.67	0.51	0.83	1.00333
TraesCS1A02G021100	1.64	2.6	2.34	2.19333	2.69	2.66	2.81	2.72	2.32	2.09	3.39	2.6	0.73	1.71	1.84	1.42667	2.46	0.31	0.24	1.00333
TraesCS5D02G490800	1.53	3.62	3.56	2.90333	2.63	2.82	0.46	1.97	0.29	0.32	0.58	0.396667	1.38	1.4	0.1	0.96	2.73	0.28	0	1.00333
TraesCS5D02G510900	1.08	1.19	1.27	1.18	1.53	1.43	1.19	1.38333	0.7	0.78	0.41	0.63	1.51	1.57	1.84	1.64	1.7	0.38	0.92	1
TraesCS5D02G536800	2.09	2.61	2.54	2.41333	2.93	2.99	2.71	2.87667	2.76	2.96	3.28	3	2.82	2.84	1.68	2.44667	2.05	0.22	0.72	0.996667
TraesCS6D02G364600	4.07	5.2	5.23	4.83333	2.93	2.72	1.45	2.36667	0.55	1.34	0.47	0.786667	0.19	1.58	2.79	1.52	2.52	0.36	0.11	0.996667
TraesCS6D02G352300	0.47	1.11	1.02	0.866667	0.99	2.03	0.54	1.18667	0.5	1.44	2.3	1.41333	2.47	1.31	0.73	1.50333	1.74	0.16	1.09	0.996667
TraesCS7D02G145500	1.34	1.61	1.38	1.44333	1.49	1.39	0.82	1.23333	0.51	0.75	0.8	0.686667	1.23	1.48	1.28	1.33	1.13	0.26	1.6	0.996667
TraesCS5D02G539700	0.28	0.41	0.44	0.376667	0.9	0.84	1.2	0.98	0.32	0.63	0.33	0.426667	1.87	1.53	2.44	1.94667	1.78	0.47	0.73	0.993333
TraesCS5D02G501000	2.12	2.56	2.66	2.44667	0.69	0.69	0.02	0.466667	0.36	0.34	0.86	0.52	1.47	1.85	1.19	1.50333	0.18	0.11	2.69	0.993333
TraesCS5D02G544300	1.77	1.9	1.87	1.84667	1.73	1.94	1.35	1.67333	0.82	1.55	1.56	1.31	2	2.28	1.76	2.01333	1.77	0.25	0.95	0.99
TraesCS5D02G532100	0.36	0.39	0.39	0.38	1.59	2.54	4.73	2.95333	4.36	5.15	5.85	5.12	1.22	1.5	2.69	1.80333	1.57	0.21	1.19	0.99
TraesCS6D02G383600	2.06	2.6	2.41	2.35667	2.12	2.37	1.33	1.94	1.47	1.02	1.08	1.19	2.03	3.09	2.02	2.38	2.03	0.31	0.62	0.986667
TraesCS7D02G145400	2.53	1.86	2.09	2.16	3.11	2.54	1.54	2.39667	1.85	1.49	1.03	1.45667	2.18	3.25	1.44	2.29	1.62	0.7	0.63	0.983333
TraesCS5D02G501300	0.99	1.08	0.91	0.993333	3.04	2.39	3.34	2.92333	5.68	3.82	2.75	4.08333	1.8	2.4	1.88	2.02667	1.91	0.18	0.85	0.98
TraesCS5D02G495200	0	0	0	0	0	0	0	0	0	0	0	0	0	0	1.1	0.366667	2.9	0.04	0	0.98
TraesCS6D02G350300	4.52	2.93	2.9	3.45	4.3	5.17	2.72	4.06333	3.38	2.71	0.05	2.04667	3.04	3.39	4.03	3.48667	2.74	0.17	0.02	0.976667
TraesCS5D02G522900	0.38	0.42	0.51	0.436667	0.69	1.35	1.68	1.24	0.3	0.75	1.11	0.72	1.14	1.42	1.57	1.37667	1.5	0.26	1.16	0.973333
TraesCS5D02G475300	0	0	0	0	0	0	0	0	0	0	0	0	0	0	0	0	2.92	0	0	0.973333
TraesCS5A02G402900	0.34	3.06	1.62	1.67333	0	0	0.56	0.186667	1.33	0.19	0	0.506667	0.16	0	0.73	0.296667	0.98	0.83	1.09	0.966667
TraesCS5D02G518500	1.14	0.78	0.83	0.916667	0.83	0.98	0.66	0.823333	0.54	0.48	0.5	0.506667	1.3	0.96	1.47	1.24333	1.38	0.41	1.09	0.96
TraesCS5D02G515100	2.01	1.9	1.85	1.92	2.07	1.38	1.35	1.6	1.06	0.84	0.16	0.686667	2.88	2.17	2.1	2.38333	1.55	0.28	1.04	0.956667
TraesCS5D02G533500	3.61	4.68	4.64	4.31	2.64	4.12	3.87	3.54333	2.43	2.16	2.49	2.36	1.25	2.51	2.85	2.20333	1.47	0.41	0.98	0.953333
TraesCS1A02G025600	3.61	2.95	2.87	3.14333	1.69	3.75	1.04	2.16	1.63	3.34	4.47	3.14667	3.66	3.4	1.5	2.85333	2.58	0.09	0.18	0.95
TraesCS5D02G282800	0.89	1.2	1.1	1.06333	1.39	1.8	1.63	1.60667	0.82	0.85	0.76	0.81	1.74	1.58	1.96	1.76	1.87	0.27	0.71	0.95
TraesCS5D02G525900	0.12	0.32	0.23	0.223333	1.04	1.19	0.97	1.06667	0.1	0.66	1.02	0.593333	1.83	1.78	2.11	1.90667	1.49	0.29	1.06	0.946667
TraesCS6D02G378500	0.88	0.64	0.94	0.82	1.68	1.13	1.9	1.57	2.62	1.78	1.06	1.82	1.54	1.07	1.36	1.32333	0.87	0.28	1.69	0.946667
TraesCS3D02G532700	1.48	1.04	1.07	1.19667	3.36	1.78	0.14	1.76	0.43	0.82	0.05	0.433333	3.53	3.06	2.62	3.07	2.5	0.16	0.15	0.936667
TraesCS6D02G371100	0.22	0.26	0.3	0.26	1.47	2.31	4.25	2.67667	4.48	4.74	4.42	4.54667	1.44	2.04	2.93	2.13667	2.15	0.09	0.56	0.933333
TraesCS5D02G545500	2.92	2.7	2.65	2.75667	2.22	1.8	1.14	1.72	1.47	1.03	1.2	1.23333	1.37	1.36	1.31	1.34667	1.71	0.15	0.94	0.933333
TraesCS6D02G362700	2.18	1.3	1.49	1.65667	1.2	1.42	1.41	1.34333	1.01	0.31	0.41	0.576667	0.68	1.54	1.79	1.33667	1.75	0.52	0.53	0.933333
TraesCS5A02G397800	1.99	2.31	2.14	2.14667	1.61	1.14	1.88	1.54333	2.59	2.23	2.37	2.39667	0.81	1.3	0.77	0.96	0.42	0.16	2.22	0.933333
TraesCS3D02G541400	0	0	0	0	0	0	0	0	0	0	0	0	0	0	0	0	2.79	0	0	0.93
TraesCS5D02G515300	3.31	3.66	3.94	3.63667	3.56	4.11	6.06	4.57667	1.65	1.84	3.34	2.27667	0.72	2.12	3.69	2.17667	0.47	0.13	2.18	0.926667
TraesCS6D02G348000	2.64	1.62	1.79	2.01667	2.75	1.29	0.25	1.43	1.77	1.29	0.24	1.1	3.1	1.57	1.44	2.03667	1.84	0.26	0.68	0.926667
TraesCS5D02G485100	2.93	3.31	3.1	3.11333	1.24	2.48	1.34	1.68667	1.96	1.24	2.37	1.85667	1.11	0.82	1.04	0.99	1.33	0.38	1.07	0.926667
TraesCS6D02G359800	0.03	0.01	0	0.0133333	0.06	0.03	0	0.03	0.03	0.03	0.05	0.0366667	0	0	0.02	0.00666667	0.02	0.3	2.46	0.926667
TraesCS5D02G517100	1.66	1.34	1.37	1.45667	0.96	1.86	1.54	1.45333	0.66	0.69	0.33	0.56	1.88	1.5	2.08	1.82	1.16	0.49	1.12	0.923333
TraesCS6D02G372100	0.39	1.16	0.97	0.84	2.02	1.95	1.87	1.94667	0.8	1.28	1.84	1.30667	2.43	2.94	2.1	2.49	2.09	0.21	0.45	0.916667
TraesCS1D02G250800	0.13	0.26	0.12	0.17	0.18	0.17	0.14	0.163333	0.28	0.03	0.21	0.173333	1.28	1.18	2.17	1.54333	1.53	0.09	1.13	0.916667
TraesCS5D02G515000	1.75	1.34	1.38	1.49	2.46	1.8	1.5	1.92	1.86	1.61	0.79	1.42	3.22	2.63	2.2	2.68333	1.86	0.27	0.61	0.913333
TraesCS5D02G510200	1.27	1.29	1.26	1.27333	1.97	1.44	1.15	1.52	0.9	1.3	1.25	1.15	2.21	1.23	1.41	1.61667	1.29	0.13	1.32	0.913333
TraesCS1D02G249000	0.17	0.21	0.14	0.173333	0.67	0.25	0.16	0.36	2.47	1.26	0.01	1.24667	1.38	2.1	0.87	1.45	2.15	0.22	0.37	0.913333
TraesCS5D02G503000	1.16	0.65	0.83	0.88	1.5	0.87	0.62	0.996667	0.65	0.72	0.29	0.553333	1.53	0.9	1.01	1.14667	1.35	0.22	1.17	0.913333
TraesCS4A02G018500	0	0	0	0	0.12	0.32	0	0.146667	0.03	0.08	0.02	0.0433333	0.68	2.43	2.35	1.82	2.29	0.35	0.09	0.91
TraesCS5D02G543700	0	0.05	0.04	0.03	0	0	0.02	0.00666667	0	0.02	0.02	0.0133333	0.19	0.24	0.84	0.423333	1.83	0.25	0.65	0.91
TraesCS6D02G350000	0.66	0.69	0.57	0.64	1.74	3.97	6.2	3.97	5.09	4.5	6.13	5.24	0.57	1.9	4.04	2.17	2.49	0.15	0.08	0.906667
TraesCS6D02G381600	0.39	0	0.67	0.353333	1.74	1.81	3.06	2.20333	0.41	2.09	2.1	1.53333	2.15	2.06	0.8	1.67	1.44	0.94	0.34	0.906667
TraesCS5D02G521000	0.01	0.02	0	0.01	0	0	0	0	0	0	0	0	0	0	0.01	0.00333333	0.25	1.25	1.22	0.906667
TraesCS3D02G539700	0.05	0	0	0.0166667	0	0	0	0	0.05	0	0	0.0166667	0.14	0	0	0.0466667	2.64	0.02	0.05	0.903333
TraesCS7D02G146300	1.41	2.37	2.1	1.96	2.87	2.74	3.62	3.07667	1.89	2.57	4.32	2.92667	1.51	4.11	3.71	3.11	0.62	0.41	1.67	0.9
TraesCS4A02G023900	0.88	1.22	1.15	1.08333	1.52	1.46	1.35	1.44333	0.59	0.52	0.83	0.646667	1.48	1.52	1.61	1.53667	1.46	0.29	0.95	0.9
TraesCS5D02G514500	0.84	0.86	0.96	0.886667	1.81	0.8	1.14	1.25	1.45	2.21	2.3	1.98667	2.09	1.67	1.32	1.69333	1.18	0.34	1.17	0.896667
TraesCS5D02G521900	1.09	1.34	1.3	1.24333	1.22	1.25	0.93	1.13333	0.37	0.59	0.73	0.563333	1.16	1.18	1.23	1.19	1	0.09	1.6	0.896667
TraesCS5A02G397900	0.51	0.93	0.76	0.733333	0.76	1.28	1.23	1.09	1.62	1.28	4.02	2.30667	0.34	0.73	1.44	0.836667	0.62	0.4	1.67	0.896667
TraesCS5D02G508200	2.9	2.51	2.52	2.64333	2.41	2.11	1.46	1.99333	1.63	1.36	1.61	1.53333	2.19	2.51	2.09	2.26333	2.35	0.15	0.18	0.893333
TraesCS6D02G358200	1.89	3.49	2.99	2.79	0.84	1.37	0.85	1.02	0.66	0.77	0.83	0.753333	0.94	0.92	1.56	1.14	1.18	0.2	1.3	0.893333
TraesCS5D02G544800	1.39	1.27	1.23	1.29667	1.35	1.33	0.84	1.17333	0.8	0.73	0.67	0.733333	1.1	1.12	1.2	1.14	1.31	0.32	1.05	0.893333
TraesCS5D02G543900	0.31	0.5	0.49	0.433333	0.29	0.7	1.18	0.723333	0.26	0.4	0.69	0.45	0.88	1.3	1.41	1.19667	0.99	0.24	1.44	0.89
TraesCS5D02G540600	0.07	0.11	0.35	0.176667	0.59	0.94	1.33	0.953333	0.19	0.71	0.34	0.413333	1.1	2.16	1.56	1.60667	2.55	0.05	0.06	0.886667
TraesCS6D02G393100	1.58	1.36	1.29	1.41	2.2	1.22	0.97	1.46333	1.72	1.18	0.76	1.22	2.61	1.63	1.41	1.88333	1.71	0.19	0.75	0.883333
TraesCS1A02G029100	1.99	2.15	2.15	2.09667	2.69	2.03	0.8	1.84	1.19	1.11	0.8	1.03333	2.86	2.9	2.06	2.60667	1.72	0.38	0.54	0.88
TraesCS5D02G502700	1.64	1.25	1.34	1.41	2.55	1.15	0.13	1.27667	0.98	1.17	0.08	0.743333	3.38	1.76	2.09	2.41	2.2	0.4	0.04	0.88
TraesCS4A02G027100	0	0	0	0	0	0	0	0	0	0	0	0	0.05	0	0	0.0166667	2.64	0	0	0.88
TraesCS1A02G023900	0	0.09	0.11	0.0666667	0.35	0.12	0.21	0.226667	0	0.13	0.04	0.0566667	0.9	1.06	2.05	1.33667	1.78	0.56	0.29	0.876667
TraesCS3D02G529700	1.39	1.59	1.47	1.48333	1.32	1.36	1.27	1.31667	1.88	2.67	3.41	2.65333	1.19	1.22	1.48	1.29667	1.35	0.09	1.19	0.876667
TraesCS6D02G370600	1.19	1.02	0.97	1.06	1.24	1.27	1.87	1.46	1.7	1.42	1.75	1.62333	1.21	1.53	1.85	1.53	1.69	0.23	0.69	0.87
TraesCS6D02G396200	0	0	0	0	0	0	0	0	0	0	0	0	0	0	2.94	0.98	2.61	0	0	0.87
TraesCS1A02G028600	0.53	0.41	0.44	0.46	2.09	1.75	0.63	1.49	0.77	0.81	0.15	0.576667	2.48	2.76	1.9	2.38	2.04	0.22	0.34	0.866667
TraesCS3D02G541700	1.37	1.37	1.48	1.40667	1.88	1.11	0.46	1.15	0.65	0.9	0.3	0.616667	2.45	2.13	1.81	2.13	1.54	0.34	0.72	0.866667
TraesCS6B02G053700	0.02	0.04	0.04	0.0333333	0.86	0.74	0.47	0.69	0.26	0.29	0.07	0.206667	2.97	2.56	2.56	2.69667	2.25	0.26	0.08	0.863333
TraesCS5D02G519900	0.04	0.14	0.11	0.0966667	1.23	1.24	2.57	1.68	2.08	2.75	3.95	2.92667	1.76	2.21	2.03	2	1.28	0.32	0.99	0.863333
TraesCS3D02G545100	0.08	0.38	0.28	0.246667	3.7	3.65	4.12	3.82333	2.61	1.55	0.48	1.54667	0.89	4.02	0.96	1.95667	2.46	0.1	0.03	0.863333
TraesCS5D02G506700	0.7	0.89	0.98	0.856667	1.29	0.85	1.01	1.05	0.93	0.91	0.72	0.853333	1.89	1.74	1.87	1.83333	1.36	0.41	0.81	0.86
TraesCS5D02G282000	1.18	0.94	1.03	1.05	1.58	1.14	0.89	1.20333	0.6	0.93	0.59	0.706667	1.77	1.64	1.4	1.60333	1.02	0.28	1.28	0.86
TraesCS5D02G498400	1.97	1.82	1.79	1.86	3.83	3.27	1.6	2.9	4.03	2.99	0	2.34	1.07	4.64	2.05	2.58667	2.53	0.04	0	0.856667
TraesCS5D02G484400	1.56	2.23	2.19	1.99333	2.45	2.39	1.12	1.98667	0.83	1.13	0.58	0.846667	2.67	2.48	1.84	2.33	1.7	0.31	0.56	0.856667
TraesCS3D02G544600	1.59	1.37	1.21	1.39	0.73	0	1.08	0.603333	1.07	1.08	0.62	0.923333	1.36	0.74	1.1	1.06667	1.51	0.09	0.97	0.856667
TraesCS7D02G137500	0.75	0.82	1.26	0.943333	0.86	1.31	0.24	0.803333	0.51	0	0	0.17	0.5	1.5	1.07	1.02333	0.59	0.65	1.33	0.856667
TraesCS5D02G526000	0.05	0.08	0.09	0.0733333	0.95	1.39	1.36	1.23333	0.33	0.9	1.31	0.846667	1.79	1.74	2.07	1.86667	1.36	0.26	0.94	0.853333
TraesCS5A02G404200	1.73	1.75	1.72	1.73333	2.43	2.98	0.02	1.81	1.07	0.75	0.04	0.62	1.52	1.6	0.52	1.21333	1.8	0.65	0.11	0.853333
TraesCS6D02G374200	0.12	0.78	0.85	0.583333	1.8	2.74	3.49	2.67667	2.3	5.21	5.74	4.41667	0.84	2.81	2.44	2.03	1.27	0.47	0.81	0.85
TraesCS6D02G349300	3.77	3.86	3.66	3.76333	2.49	1.1	1.8	1.79667	1.02	1.22	2.27	1.50333	2.19	2.66	2.89	2.58	2.17	0.24	0.12	0.843333
TraesCS4A02G021900	1.06	1.09	0.93	1.02667	2.21	1.26	0.79	1.42	1.61	1.18	0.25	1.01333	2.86	2.01	2.11	2.32667	1.91	0.3	0.32	0.843333
TraesCS3D02G538600	0.03	0.01	0.02	0.02	0	0	0	0	0	0.02	0.01	0.01	0	0	0	0	0	2.53	0	0.843333
TraesCS5D02G509300	2.17	1.76	1.92	1.95	3.06	1.43	1.53	2.00667	1.92	1.66	0.42	1.33333	3	2.62	2.12	2.58	1.96	0.47	0.09	0.84
TraesCS6B02G058900	0.42	0.76	0.73	0.636667	1.44	1.81	2.25	1.83333	0.56	1.08	1.09	0.91	2.44	2	2.68	2.37333	1.8	0.5	0.22	0.84
TraesCS5D02G509500	0	0	0	0	0	0	0	0	0	0	0	0	0	0.54	0.91	0.483333	2.51	0	0	0.836667
TraesCS3D02G542900	0	0	0	0	0	0	0	0	0	0	0	0	0	0	0	0	2.51	0	0	0.836667
TraesCS5D02G504400	0	0.09	0	0.03	0	0	0	0	0	0	0	0	0	0.05	0	0.0166667	0	1.9	0.6	0.833333
TraesCS5D02G550100	0	0.09	0.01	0.0333333	1.47	1.28	0.03	0.926667	0.02	1.36	0.61	0.663333	0.1	0.35	0.17	0.206667	2.49	0	0	0.83
TraesCS5A02G395800	0	0.07	0	0.0233333	0	0	0.1	0.0333333	0.03	0.03	0	0.02	0	0	0	0	0.1	2.31	0.07	0.826667
TraesCS6D02G363500	0.77	1.73	0.99	1.16333	1.21	0.43	1.08	0.906667	0.97	1.27	0.5	0.913333	1.41	2.09	1.86	1.78667	1.38	0.28	0.81	0.823333
TraesCS6D02G392800	1.95	1.53	1.75	1.74333	2.04	1.5	0.59	1.37667	1.33	0.7	0.45	0.826667	1.65	1.69	1	1.44667	1.23	0.35	0.87	0.816667
TraesCS5D02G511500	0.76	0.73	0.85	0.78	1.11	0.72	0.57	0.8	0.87	0.45	0.2	0.506667	1.77	1.34	0.96	1.35667	0.87	0.51	1.07	0.816667
TraesCS5D02G557400	3.22	3.85	4.28	3.78333	3.58	4.3	4.97	4.28333	0.79	1.15	0.87	0.936667	2.1	1.57	2.79	2.15333	0.97	0.33	1.14	0.813333
TraesCS1D02G252000	0.68	0.8	0.91	0.796667	1.82	1.7	2.65	2.05667	3.81	2.44	2.15	2.8	2.08	1.94	2.15	2.05667	1.8	0.4	0.24	0.813333
TraesCS5D02G281400	1.14	1.06	1.13	1.11	1.82	1.45	1.07	1.44667	1.2	1.03	0.39	0.873333	1.72	1.48	1.72	1.64	1.4	0.39	0.65	0.813333
TraesCS5D02G551200	0.02	0.04	0.04	0.0333333	1.92	2.15	4.13	2.73333	3.59	3.97	4.8	4.12	1.08	2.28	2.5	1.95333	2.2	0.22	0.01	0.81
TraesCS1A02G016200	0.64	0.64	0.71	0.663333	1.06	0.92	0.68	0.886667	0.42	0.68	0.26	0.453333	1.48	1.62	1.62	1.57333	1.31	0.2	0.92	0.81
TraesCS5D02G489600	1	1.15	0.93	1.02667	1.29	0.93	1.16	1.12667	0.89	0.76	0.81	0.82	1.94	1.64	1.97	1.85	1.51	0.41	0.5	0.806667
TraesCS5D02G490100	1.1	1.17	1.21	1.16	1.42	1.6	1.09	1.37	0.32	0.67	0.86	0.616667	1.67	1.5	1.91	1.69333	1.65	0.35	0.42	0.806667
TraesCS5D02G473200	2.41	1.76	1.95	2.04	1.02	1.64	1.16	1.27333	1.1	1	0.79	0.963333	0.62	1	0.87	0.83	2.38	0.03	0	0.803333
TraesCS1D02G000524	0.16	0	0.23	0.13	0.32	0.3	1.51	0.71	1.14	0.49	0.5	0.71	0.35	0	0.54	0.296667	0.38	1.55	0.47	0.8
TraesCS7D02G147400	2.21	2.09	1.92	2.07333	2.64	2.2	1.33	2.05667	1.38	1.54	0.89	1.27	2.79	3.14	1.95	2.62667	1.82	0.55	0.02	0.796667
TraesCS5D02G280800	2.97	2.47	2.44	2.62667	0.56	1.08	1.2	0.946667	0	0.52	0.68	0.4	0.11	3.23	2.34	1.89333	1.34	0.98	0.06	0.793333
TraesCS7D02G140300	1.96	1.54	1.72	1.74	1.84	1.74	1.11	1.56333	0.91	0.73	0.65	0.763333	1.33	1.14	1.55	1.34	1.53	0.37	0.48	0.793333
TraesCS6D02G381200	1.49	1.56	1.65	1.56667	0.56	0.43	0.36	0.45	0.41	0.36	0.72	0.496667	0.93	0.69	0.98	0.866667	1.42	0.24	0.72	0.793333
TraesCS5D02G561200	2	1.95	2.02	1.99	1.71	1.69	1.49	1.63	1.03	1.35	1.32	1.23333	2.1	2.48	2.02	2.2	1.97	0.14	0.25	0.786667
TraesCS6D02G387300	0.2	0.24	0.38	0.273333	1.33	1.69	3.99	2.33667	4.57	3.67	3.87	4.03667	1.09	1.34	2.48	1.63667	1.89	0.14	0.33	0.786667
TraesCS3D02G530600	0.43	0.7	0.68	0.603333	1.35	2.01	2.12	1.82667	3.51	2.3	1.95	2.58667	1.43	1.5	1.61	1.51333	1.78	0.13	0.45	0.786667
TraesCS6D02G356200	0.5	0.71	0.93	0.713333	0.45	0.73	0.39	0.523333	0.5	0.67	1.17	0.78	0.57	0.6	1.58	0.916667	0.68	0.21	1.47	0.786667
TraesCS7D02G143300	1.51	1.52	1.47	1.5	2.37	2.07	1.95	2.13	2.38	1.94	1.47	1.93	2.24	2.4	1.93	2.19	1.95	0.21	0.19	0.783333
TraesCS1D02G250400	0.8	0.88	0.87	0.85	1.35	1.2	1.51	1.35333	2.13	1.37	1.13	1.54333	1.58	1.6	1.56	1.58	1.26	0.14	0.95	0.783333
TraesCS7D02G140900	0.54	0.36	0.45	0.45	0.03	0.03	0	0.02	0.11	0	0	0.0366667	0	0.19	0.13	0.106667	1.74	0.37	0.23	0.78
TraesCS5A02G403400	1.93	1.78	2.02	1.91	2.47	2.14	0.57	1.72667	1.76	1.23	0.18	1.05667	2.2	1.76	1.41	1.79	2.06	0.17	0.1	0.776667
TraesCS7D02G142000	1.79	2.84	2.87	2.5	1.91	3.85	3.98	3.24667	0.66	1.9	3.28	1.94667	0	0.61	2.96	1.19	1.62	0.63	0.08	0.776667
TraesCS5D02G478400	2.67	2.81	2.78	2.75333	3.71	2.5	0	2.07	2.64	1.8	0	1.48	4.28	2.01	1.78	2.69	1.95	0.37	0	0.773333
TraesCS5D02G284100	0.09	0.09	0.09	0.09	1.3	0.74	0.41	0.816667	0.37	0.38	1.09	0.613333	2.6	3.66	1.88	2.71333	2.05	0.21	0.05	0.77
TraesCS5D02G520200	1.36	2.16	2.08	1.86667	2.64	2.14	2.19	2.32333	0.8	1.66	2.16	1.54	2.84	2.35	1.73	2.30667	1.49	0.3	0.52	0.77
TraesCS4A02G020100	1.66	2.18	2.17	2.00333	0.23	0.15	0.31	0.23	0.39	0.09	0.02	0.166667	0.33	0.62	0.54	0.496667	1.6	0.05	0.64	0.763333
TraesCS5A02G404000	1.79	2.38	2.06	2.07667	2.53	2.83	0.24	1.86667	1.85	1.2	0.2	1.08333	1.37	2.4	1.2	1.65667	1.07	0.66	0.55	0.76
TraesCS6D02G367600	1.77	2.7	2.56	2.34333	1.2	2.64	0.15	1.33	0.59	2.74	1.51	1.61333	1.71	0.3	0.13	0.713333	2.22	0.05	0.01	0.76
TraesCS6B02G054700	0.01	0	0	0.00333333	0.03	0.13	0.01	0.0566667	0	0.03	0	0.01	1.65	1.61	2.46	1.90667	2.05	0.19	0.03	0.756667
TraesCS5D02G516500	3.66	2.97	2.91	3.18	2.33	3.08	2.1	2.50333	1.7	2.28	1.66	1.88	1.31	0.64	1.52	1.15667	0.26	0.57	1.43	0.753333
TraesCS4A02G021100	0.02	0.05	0.07	0.0466667	0.1	0.08	0.01	0.0633333	0.06	0.03	0	0.03	0.79	0.75	0.84	0.793333	1.03	0.09	1.14	0.753333
TraesCS5D02G538900	1.07	3.37	3.17	2.53667	0	0	0.55	0.183333	0.05	0.13	0	0.06	0	0.82	0.75	0.523333	1.52	0.74	0	0.753333
TraesCS5D02G555300	1.43	1.28	1.46	1.39	1.97	1.66	1.21	1.61333	1.15	1.02	0.6	0.923333	2.38	2.41	1.71	2.16667	1.61	0.21	0.43	0.75
TraesCS6D02G373700	0	0	0	0	0	0	0	0	0	0	0	0	0	0	0.91	0.303333	1.39	0.77	0.08	0.746667
TraesCS5D02G548500	1.59	1.55	1.62	1.58667	2.31	1.92	1.49	1.90667	0.72	1.44	0.85	1.00333	2.55	2.47	2.04	2.35333	1.49	0.24	0.5	0.743333
TraesCS5D02G552100	0.66	0	0	0.22	0.32	0.53	0.34	0.396667	1.04	1.15	0.47	0.886667	0.24	0.15	0.58	0.323333	1.84	0.01	0.38	0.743333
TraesCS5A02G404600	1.46	2.07	1.99	1.84	3.12	2.4	1.27	2.26333	1.08	2.22	1.26	1.52	3.47	3.35	2.55	3.12333	1.48	0.34	0.39	0.736667
TraesCS6D02G370100	3.65	3.08	2.98	3.23667	2.08	2.09	0	1.39	0.25	0.13	0	0.126667	0	0	0	0	0	0.3	1.91	0.736667
TraesCS5D02G494700	0.16	1.34	0.45	0.65	1.12	2.2	3.45	2.25667	1.29	2.31	2.93	2.17667	1.34	1.77	2.73	1.94667	1.84	0.09	0.25	0.726667
TraesCS6D02G365100	0	0.01	0	0.00333333	1.29	1.37	0.71	1.12333	1.9	1.84	0.82	1.52	1.31	4.33	1.94	2.52667	2.13	0.03	0	0.72
TraesCS5D02G501400	1.06	1.69	1.8	1.51667	1.6	0.77	0.51	0.96	0.6	0.64	0.14	0.46	2.39	1.8	0.84	1.67667	1.08	0.16	0.92	0.72
TraesCS6D02G393000	2.53	2.08	2.07	2.22667	1.99	2.04	1.46	1.83	1.66	1.38	1.13	1.39	1.09	1.68	1.06	1.27667	1.35	0.19	0.62	0.72
TraesCS6D02G393800	0.28	0.15	0.15	0.193333	0.01	0.02	0.01	0.0133333	0	0.22	1.53	0.583333	0.03	0.83	0.36	0.406667	0.17	1.15	0.84	0.72
TraesCS3D02G537400	1.22	1.7	1.7	1.54	1.53	0.96	0.3	0.93	0.58	0.56	0.17	0.436667	1.84	0.96	1.4	1.4	0.78	0.2	1.17	0.716667
TraesCS5D02G471500	0.11	0.22	0.06	0.13	1.89	2.22	4.59	2.9	3.95	3.82	3.51	3.76	1.22	1.36	1.33	1.30333	2.09	0.06	0	0.716667
TraesCS6D02G362800	0.08	1.07	0.99	0.713333	0.16	0.1	0.03	0.0966667	0.15	0.07	0.18	0.133333	0.03	0.06	1.67	0.586667	2.05	0.1	0	0.716667
TraesCS6B02G057800	0.05	0.12	0.1	0.09	0	0	0	0	0	0.03	0	0.01	0.1	0.08	0.57	0.25	1.78	0.37	0	0.716667
TraesCS5D02G557700	0.97	0.83	0.98	0.926667	2.14	1.67	0.42	1.41	0.68	0.95	0.83	0.82	2.98	2.56	1.5	2.34667	1.98	0.08	0.08	0.713333
TraesCS4A02G022200	0.54	0.31	0.54	0.463333	1.03	1.02	1.44	1.16333	0.52	0.99	0.68	0.73	1.89	2.17	1.59	1.88333	1.17	0.38	0.58	0.71
TraesCS1A02G020400	1.95	1.7	1.78	1.81	2.16	1.65	0.95	1.58667	1.01	1.01	0.49	0.836667	1.91	2.18	1.21	1.76667	1	0.71	0.42	0.71
TraesCS6D02G349200	1	1.09	0.9	0.996667	0.62	1.48	1.85	1.31667	0.6	0.85	1.6	1.01667	0.44	1.08	1.35	0.956667	1.45	0.21	0.46	0.706667
TraesCS5D02G526400	0.17	0.11	0.04	0.106667	1.96	1.59	1.11	1.55333	0.3	0.7	0.73	0.576667	2.2	2.17	2.04	2.13667	1.37	0.27	0.47	0.703333
TraesCS6D02G353300	0.03	0.12	0.04	0.0633333	1.4	1.64	0.49	1.17667	4.65	5.05	1.64	3.78	1.2	1.96	0.46	1.20667	2.05	0.04	0.02	0.703333
TraesCS1A02G029900	0.09	0	0.03	0.04	0.01	0.13	0	0.0466667	0.01	0	0	0.00333333	0	0	0	0	0	0.27	1.83	0.7
TraesCS5D02G541300	0.05	0.37	0.49	0.303333	0.95	0.86	1.09	0.966667	0.63	0.59	0.3	0.506667	1.75	1.89	2.26	1.96667	1.66	0.24	0.19	0.696667
TraesCS5D02G565800	0.29	0.46	0.54	0.43	2.07	1.38	2.68	2.04333	4.77	2.62	1.87	3.08667	1.24	1.42	1.76	1.47333	1.3	0.07	0.72	0.696667
TraesCS5D02G530900	0.95	0.83	0.76	0.846667	0.99	0.85	0.79	0.876667	0.59	0.98	1.17	0.913333	1.21	0.94	1.14	1.09667	0.96	0.15	0.98	0.696667
TraesCS3D02G543300	0.07	0.26	0.11	0.146667	0.04	0	0.03	0.0233333	0.04	0.04	0.39	0.156667	0.04	0.05	0.7	0.263333	0.14	0.02	1.92	0.693333
TraesCS5D02G556600	0	0.01	0	0.00333333	0	0	0	0	0.02	0	0	0.00666667	0	0	0	0	0	2.08	0	0.693333
TraesCS5D02G518800	1.33	1.69	1.72	1.58	2.13	2.06	2.76	2.31667	3.22	4.13	4.91	4.08667	1.15	2.25	1.82	1.74	1.28	0.25	0.54	0.69
TraesCS7A02G134400	1.71	1.81	1.81	1.77667	1.35	1.55	1.24	1.38	0.96	0.99	1.55	1.16667	1.38	1.56	1.15	1.36333	0.57	0.18	1.31	0.686667
TraesCS5D02G523500	0.01	0.08	0.03	0.04	0.11	0.15	0.1	0.12	0.01	0.02	0.04	0.0233333	0.32	0.72	1.19	0.743333	1.28	0.28	0.5	0.686667
TraesCS6D02G380700	0.03	0.05	0.09	0.0566667	0	0	0	0	0	0.13	0.68	0.27	0	0	0	0	1.99	0.03	0.04	0.686667
TraesCS6D02G395000	1.63	2.02	1.93	1.86	1.7	1.15	3.37	2.07333	2.97	3.17	4.14	3.42667	0.62	2.13	1.76	1.50333	1.86	0.14	0.05	0.683333
TraesCS6D02G349100	1.12	0.98	0.89	0.996667	0.93	0.35	1.63	0.97	1.61	0.32	1.74	1.22333	0.16	1.17	1.31	0.88	1.47	0.17	0.4	0.68
TraesCS5D02G486600	2.67	2.25	2.31	2.41	2.61	1.84	2.88	2.44333	2.36	1.84	1.58	1.92667	2.32	2.65	2.16	2.37667	1.24	0.27	0.52	0.676667
TraesCS1D02G250300	0.32	0.07	0.21	0.2	0.95	0.62	0.3	0.623333	0.13	0.3	0.2	0.21	1.76	4.37	0.81	2.31333	0.37	0.15	1.51	0.676667
TraesCS5D02G539500	1.68	4.57	4.37	3.54	0.6	0.93	1.44	0.99	0.03	0.24	0	0.09	0.18	5.01	0.21	1.8	1.75	0.28	0	0.676667
TraesCS7D02G143600	2.41	2.68	2.85	2.64667	1.59	1.67	1.94	1.73333	0.93	1.57	2.1	1.53333	1.02	1.06	1.92	1.33333	1.08	0.15	0.8	0.676667
TraesCS5D02G523800	0	0.02	0.02	0.0133333	0.51	0.76	0.68	0.65	0.06	0.33	0.26	0.216667	0.66	0.8	1.61	1.02333	1.61	0.23	0.18	0.673333
TraesCS6D02G354800	5.57	5.52	5.4	5.49667	2.2	1.96	0.12	1.42667	0.04	0.24	0.04	0.106667	0	0.25	4.37	1.54	1.93	0.04	0.04	0.67
TraesCS5D02G556700	1.13	1.22	1.5	1.28333	1.6	1.47	2.34	1.80333	2.32	2.03	1.83	2.06	1.65	1.18	1.95	1.59333	1.07	0.33	0.58	0.66
TraesCS1A02G015100	0.86	1.04	0.96	0.953333	1.39	1.63	4.69	2.57	4.3	5.04	5.79	5.04333	0.91	1.01	2.42	1.44667	1.02	0.13	0.83	0.66
TraesCS5D02G282900	1.12	0.67	0.72	0.836667	0.97	0.9	0.93	0.933333	0.89	0.5	0.47	0.62	1.34	1.3	1.41	1.35	1.11	0.11	0.76	0.66
TraesCS3D02G532800	0.43	0.24	0.3	0.323333	0.19	0.04	0	0.0766667	0.68	0.12	0	0.266667	0.34	0.11	0.22	0.223333	1.76	0.22	0	0.66
TraesCS7A02G133200	2.39	3.87	3.68	3.31333	2.12	2.2	1.42	1.91333	2.06	2.84	4.07	2.99	2.44	3.57	3.29	3.1	1.89	0.06	0.02	0.656667
TraesCS7D02G148200	0.5	1.78	1.57	1.28333	1.31	1.2	2.12	1.54333	0.55	1.52	2.26	1.44333	1.84	2.1	2.15	2.03	1.08	0.13	0.76	0.656667
TraesCS5D02G491300	0.07	0.68	0.4	0.383333	0.3	1.16	0.28	0.58	0	0	0.69	0.23	0.17	0.15	0	0.106667	1.87	0.1	0	0.656667
TraesCS3D02G535200	1.65	1.19	0.95	1.26333	1.93	0.76	0.06	0.916667	0.86	0.65	0.01	0.506667	2.39	1.03	1.04	1.48667	1.52	0.27	0.17	0.653333
TraesCS3D02G534300	0	0	0	0	0	0	0	0	0	0	0	0	0	0.09	0.62	0.236667	1.86	0.09	0.01	0.653333
TraesCS3D02G545000	4.99	5.56	5.57	5.37333	1.87	2.02	0	1.29667	0	0.03	0.02	0.0166667	0	0.02	0	0.00666667	0	0.78	1.17	0.65
TraesCS6B02G055900	0	0	0.02	0.00666667	0.05	0.13	0.12	0.1	0.01	0.03	0.09	0.0433333	1.34	1.37	1.92	1.54333	1.74	0.09	0.11	0.646667
TraesCS1A02G021200	0.46	0.85	0.93	0.746667	2.84	0.92	0.18	1.31333	0.24	0.41	0.44	0.363333	0.73	1.08	1.26	1.02333	1.89	0.05	0	0.646667
TraesCS5D02G541600	0.28	0.34	0.49	0.37	0.86	0.86	1.35	1.02333	0.11	0.35	0.23	0.23	1.31	1.53	1.95	1.59667	1.48	0.17	0.28	0.643333
TraesCS5D02G493300	0.78	0.66	0.71	0.716667	1.23	1.38	1.99	1.53333	2.48	1.97	2.48	2.31	1.46	1.56	1.73	1.58333	1.42	0.19	0.32	0.643333
TraesCS3D02G534800	0.01	1.17	1.02	0.733333	0.55	0.17	0.35	0.356667	0.26	0.5	0.43	0.396667	0.01	0.4	2.53	0.98	1.69	0.24	0	0.643333
TraesCS5D02G491400	0.84	1.98	2.12	1.64667	0.89	1.69	0.03	0.87	0.31	0.57	2.69	1.19	0.71	0.71	0.37	0.596667	1.75	0.17	0	0.64
TraesCS5A02G394400	0.27	1.93	1.72	1.30667	0.32	2.14	3.07	1.84333	1.79	1.83	3.89	2.50333	0.96	2.18	2.3	1.81333	1.75	0.15	0.01	0.636667
TraesCS1D02G251800	0.73	1.07	1.03	0.943333	1.14	0.8	0.57	0.836667	0.68	0.45	0.3	0.476667	1.28	1.28	1.31	1.29	1.22	0.23	0.46	0.636667
TraesCS3D02G538000	0.87	0.69	0.56	0.706667	0	0	0.01	0.00333333	0.07	0.03	0.09	0.0633333	0.02	0.01	0	0.01	0	1.77	0.14	0.636667
TraesCS5D02G479400	2.89	5.27	5.21	4.45667	0	0	0	0	0	0	0.34	0.113333	0	0	0	0	0	0.33	1.57	0.633333
TraesCS5D02G493500	1.57	1.34	1.35	1.42	2.19	0.84	0.11	1.04667	1.19	0.92	0.06	0.723333	2.82	1.21	1.34	1.79	1.33	0.14	0.42	0.63
TraesCS6B02G059500	0.67	1.02	0.69	0.793333	1.19	0.69	0.99	0.956667	1	0.66	0.55	0.736667	1.55	1.2	1.47	1.40667	1.42	0.26	0.21	0.63
TraesCS5A02G397200	1.1	2.52	2.52	2.04667	1.7	1.17	0.55	1.14	0.06	0.08	0	0.0466667	2.32	1.46	0.79	1.52333	1.71	0.08	0.09	0.626667
TraesCS3D02G542000	0	0	0	0	0	0	0	0	0	0	0	0	0	0	0.18	0.06	1.88	0	0	0.626667
TraesCS5D02G510600	0.17	0	0	0.0566667	0	0	0	0	0	0	0	0	0	0	0	0	0.25	1.63	0	0.626667
TraesCS5D02G556200	0	0	0	0	0	0	0	0	0	0	0	0	0	0	0	0	0.42	1.46	0	0.626667
TraesCS6D02G370400	0.69	0.73	0.62	0.68	1.03	0.73	0.6	0.786667	0.31	0.61	0.52	0.48	1.54	1.5	1.28	1.44	1	0.11	0.76	0.623333
TraesCS1A02G027700	0	0.01	0	0.00333333	0	0	0	0	0	0	0	0	0.29	0.71	0.55	0.516667	1.24	0.14	0.49	0.623333
TraesCS6D02G357900	0.33	0.44	0.43	0.4	0.07	0.23	0.07	0.123333	0.06	0.09	0.27	0.14	0.4	0.35	0.66	0.47	1.12	0.09	0.66	0.623333
TraesCS5D02G535400	0	0.07	0	0.0233333	0	0	0	0	0	0	0	0	0	0	0	0	1.6	0.27	0	0.623333
TraesCS6D02G387700	0.36	0.81	0.63	0.6	0.15	0.06	0	0.07	0	0.1	0	0.0333333	0.1	0.07	0.08	0.0833333	1.76	0.1	0	0.62
TraesCS6D02G347700	0.01	0.06	0.05	0.04	0.16	0.27	0.16	0.196667	0	0.02	0.08	0.0333333	0.38	0.27	0.96	0.536667	1.13	0.35	0.37	0.616667
TraesCS5D02G515400	1.11	1.3	1.6	1.33667	1.37	1.3	1.8	1.49	0.74	1.01	1.08	0.943333	1.5	1.29	1.47	1.42	0.9	0.19	0.75	0.613333
TraesCS5D02G284500	0	0.08	0	0.0266667	0.24	0.46	0.42	0.373333	0.08	0.33	0.13	0.18	0.57	1.3	0.75	0.873333	1.23	0	0.61	0.613333
TraesCS6D02G345900	0.37	0.35	0.69	0.47	0.58	0.79	0.81	0.726667	0.2	0.47	0.69	0.453333	1.04	1.36	1.61	1.33667	1	0.12	0.71	0.61
TraesCS6B02G052800	0.77	1	1.04	0.936667	1.17	1.14	0.78	1.03	0.72	0.64	0.77	0.71	1.35	0.97	1.27	1.19667	0.98	0.1	0.75	0.61
TraesCS3D02G537900	3.41	3.06	2.75	3.07333	1.24	3.31	4.1	2.88333	0.97	1.05	0.83	0.95	1.22	1.21	2.12	1.51667	1.55	0.07	0.2	0.606667
TraesCS5D02G506500	0.61	1.24	1.13	0.993333	0.78	0.79	1.04	0.87	0.28	0.7	0.95	0.643333	0.54	0.61	1.36	0.836667	1.15	0.16	0.51	0.606667
TraesCS5D02G502200	0.16	0.22	0.46	0.28	0.18	0.18	0.07	0.143333	0.19	0.11	0.24	0.18	0.1	0.44	1.06	0.533333	0.73	0.52	0.57	0.606667
TraesCS5D02G551900	4.26	3.1	3.19	3.51667	4.59	4.74	1.37	3.56667	4.57	3.51	0.99	3.02333	1.87	2.04	0.93	1.61333	1.67	0.06	0.08	0.603333
TraesCS5A02G393400	1.97	0.95	1.42	1.44667	2.19	2.45	1.94	2.19333	1.5	1.08	1.4	1.32667	2.19	1.49	1.1	1.59333	1.2	0.35	0.26	0.603333
TraesCS5D02G538700	0.09	0.44	0.46	0.33	1.08	2.58	0.75	1.47	1.56	1.43	0.08	1.02333	0.18	1.88	1.7	1.25333	1.62	0.1	0.08	0.6
TraesCS5D02G517000	3.37	4.08	3.88	3.77667	3.87	4.22	3.81	3.96667	4.55	3.31	3.66	3.84	1.62	2.03	2.57	2.07333	1.63	0.15	0.01	0.596667
TraesCS5D02G513800	1.52	1.83	1.9	1.75	2.11	2.71	2.85	2.55667	2.5	2.26	2.9	2.55333	1.62	2.09	1.38	1.69667	1.69	0.08	0.02	0.596667
TraesCS3D02G537200	0.59	0	0.56	0.383333	0.53	0	0.58	0.37	0	0	0.5	0.166667	0	1.92	2.83	1.58333	1.64	0.15	0	0.596667
TraesCS5A02G393500	0.79	0.2	0.37	0.453333	0.98	0.81	0.78	0.856667	0.51	0.41	0.65	0.523333	1.23	0.77	0.85	0.95	0.9	0.66	0.23	0.596667
TraesCS3D02G531700	1.26	0.83	0.91	1	1.7	1.9	1.34	1.64667	0.89	1.4	1.41	1.23333	2.01	2.49	1.81	2.10333	1.63	0.12	0.03	0.593333
TraesCS6D02G377900	0.55	0.52	0.62	0.563333	1.82	2.36	2.84	2.34	3.16	3.36	3.74	3.42	1.56	2.25	1.76	1.85667	1.31	0.27	0.2	0.593333
TraesCS5D02G532900	0.02	0	0	0.00666667	0.02	0	0.15	0.0566667	0	0	0	0	0.39	1.16	1.48	1.01	1.67	0.04	0.07	0.593333
TraesCS5D02G475200	0	0	0	0	0	0	0	0	0	0	0	0	0	0	0	0	1.78	0	0	0.593333
TraesCS5D02G551400	1.08	0.83	1.02	0.976667	1.98	0.99	0.54	1.17	1.42	0.97	0.11	0.833333	2.73	1.96	1.76	2.15	1.06	0.2	0.51	0.59
TraesCS6B02G060200	0	0.07	0.06	0.0433333	1.79	2.57	4.36	2.90667	4.47	3.95	4	4.14	1.42	2.22	2.73	2.12333	1.66	0.11	0	0.59
TraesCS5D02G497800	1.95	2.63	2.55	2.37667	1.29	1.32	1.29	1.3	1.09	1.52	2.18	1.59667	1.58	1.51	1.52	1.53667	1.17	0.15	0.45	0.59
TraesCS7D02G147600	1.72	1.36	1.38	1.48667	1.56	0.73	0.41	0.9	0.71	0.49	0.29	0.496667	1.36	1.02	0.51	0.963333	1.42	0.31	0.03	0.586667
TraesCS5D02G511800	0.55	0.4	0.5	0.483333	1.22	0.82	0.29	0.776667	0.77	0.56	0.36	0.563333	1.25	0.67	0.76	0.893333	0.9	0.36	0.5	0.586667
TraesCS6D02G390900	0.55	0.93	1.54	1.00667	1.77	1.45	1.32	1.51333	0.3	0.57	0.75	0.54	2.27	1.83	1.83	1.97667	1.52	0.1	0.13	0.583333
TraesCS5D02G474100	1.9	2.58	2.49	2.32333	1.92	1.74	1.38	1.68	1.18	1.5	1.78	1.48667	1.42	2.19	1.44	1.68333	1.53	0.06	0.16	0.583333
TraesCS6B02G057179	0.16	0.64	0.57	0.456667	0.53	0.4	0.38	0.436667	0.21	0.37	0.14	0.24	0.79	0.44	0.78	0.67	0.64	0.15	0.96	0.583333
TraesCS5A02G405100	0.29	0.14	0.18	0.203333	0.54	0.18	0.04	0.253333	0.2	0.42	0.9	0.506667	0.12	0.09	0.32	0.176667	0.58	0.21	0.96	0.583333
TraesCS5D02G514900	0.23	0.46	0.38	0.356667	0.88	0.32	0.35	0.516667	0.12	0.36	0.04	0.173333	1.98	1.62	1.38	1.66	1.47	0.26	0.01	0.58
TraesCS6D02G346500	2.09	2.69	2.71	2.49667	1.44	1.39	0.07	0.966667	0.21	2.75	1.57	1.51	1.86	1.18	0.2	1.08	1.66	0.01	0.07	0.58
TraesCS6D02G346200	0.22	0.37	0.37	0.32	0.28	0.39	0.57	0.413333	0.13	0.26	0.38	0.256667	0.65	0.57	1.01	0.743333	0.82	0.27	0.65	0.58
TraesCS5D02G481400	0	0	0	0	0	0	0	0	0	0	0	0	0	0	0.52	0.173333	1.74	0	0	0.58
TraesCS5D02G495500	0	0	0	0	0	0	0	0	0	0	0	0	0	0	0	0	1.58	0.14	0.02	0.58
TraesCS5D02G509200	1.81	1.39	1.37	1.52333	2.38	0.99	0.06	1.14333	1	0.97	0.03	0.666667	2.36	1.49	0.93	1.59333	1.24	0.2	0.29	0.576667
TraesCS4A02G019600	0.71	0.71	0.74	0.72	1.08	0.74	0.75	0.856667	0.68	0.85	0.44	0.656667	1.15	1.11	1.12	1.12667	0.64	0.17	0.92	0.576667
TraesCS6D02G355200	0.32	0.41	0.53	0.42	2.48	1.93	2.6	2.33667	3.32	3.05	2.63	3	1.72	1.82	1.59	1.71	1.37	0.07	0.28	0.573333
TraesCS5D02G281700	0.88	0.6	0.79	0.756667	1.21	1.11	0.97	1.09667	1.01	0.62	0.41	0.68	1.57	1.3	1.49	1.45333	1.06	0.18	0.48	0.573333
TraesCS7A02G132000	0.11	0.44	0.33	0.293333	0	0.2	0	0.0666667	0	0.02	0.03	0.0166667	0	0.1	0.03	0.0433333	0.54	0.01	1.17	0.573333
TraesCS5D02G279500	0.08	0.38	0.77	0.41	1.11	0.77	1.12	1	0.23	0.62	0.72	0.523333	1.64	1.85	1.73	1.74	1.04	0.18	0.49	0.57
TraesCS5D02G494400	0.79	0.59	0.79	0.723333	1.97	1.78	1.15	1.63333	1.05	0.93	0.32	0.766667	1.44	2.35	1.42	1.73667	1.44	0.15	0.12	0.57
TraesCS1D02G252400	0.1	0.48	0.33	0.303333	1.78	2.46	4.06	2.76667	4.51	4.52	4.68	4.57	1.34	2.45	2.49	2.09333	1.43	0.05	0.22	0.566667
TraesCS4A02G017300	0.67	0.77	0.82	0.753333	1.61	1.55	2.22	1.79333	2.82	2.44	2.59	2.61667	1.56	1.66	1.64	1.62	0.8	0.05	0.85	0.566667
TraesCS5D02G540300	0.06	0	0.06	0.04	0.07	0.01	0.03	0.0366667	0.16	0.03	0	0.0633333	0.94	1.3	1.28	1.17333	1.45	0.09	0.16	0.566667
TraesCS7D02G147500	0.95	1.82	1.82	1.53	0.33	1.54	0.12	0.663333	0.09	0.35	0.29	0.243333	0.67	0.08	0.04	0.263333	0.67	0.02	1.01	0.566667
TraesCS1A02G028700	0.07	0.19	0.16	0.14	2.76	2.52	0.96	2.08	0.7	1.2	0.76	0.886667	2.72	3.28	1.71	2.57	1.6	0.01	0.07	0.56
TraesCS6D02G355100	0.63	0.67	0.72	0.673333	1.09	0.6	0.33	0.673333	0.25	0.46	0.28	0.33	0.8	0.38	0.5	0.56	0.5	0.07	1.11	0.56
TraesCS7A02G134300	0.12	0.09	0.11	0.106667	0	0	0	0	0	0	0	0	0.03	0	0	0.01	1.05	0.24	0.38	0.556667
TraesCS6D02G394500	1.18	1.99	2.08	1.75	0.57	0.53	0.43	0.51	0.1	0.22	0.36	0.226667	0.7	0.64	0.91	0.75	0.58	0.12	0.96	0.553333
TraesCS7D02G137700	0.03	0.04	0.04	0.0366667	0.15	0.1	0	0.0833333	0.17	0.07	0	0.08	0.16	0.26	1.27	0.563333	1.28	0.09	0.28	0.55
TraesCS3D02G536800	0	0	0	0	0	0	0	0	0	0	0	0	0	0	0	0	1.65	0	0	0.55
TraesCS6D02G386700	0.06	0.21	0.22	0.163333	2.04	2.19	0.76	1.66333	0.64	1.18	0.1	0.64	2.17	2.61	1.19	1.99	1.55	0.02	0.07	0.546667
TraesCS5D02G515200	1.86	1.93	1.89	1.89333	2.24	0.8	2.04	1.69333	1.6	0.83	1.56	1.33	2.3	1.54	1.84	1.89333	0.99	0.28	0.37	0.546667
TraesCS7A02G131300	2.23	3.89	3.75	3.29	1.63	2.67	1.97	2.09	0.57	1.42	2.41	1.46667	0.78	1.19	1.67	1.21333	0.99	0.14	0.51	0.546667
TraesCS6B02G058500	0.68	1.01	0.95	0.88	1.43	0.8	0.47	0.9	0.45	0.95	0.27	0.556667	1.47	1.13	0.82	1.14	0.9	0.08	0.66	0.546667
TraesCS7D02G148100	0	0	0	0	0	0	0	0	0	0	0.01	0.00333333	0	0.01	0.13	0.0466667	1.63	0	0	0.543333
TraesCS1A02G028500	0.93	0.97	0.93	0.943333	2.67	2.05	1.73	2.15	1.31	1.24	0.47	1.00667	2.23	2.95	1.62	2.26667	1.37	0.08	0.17	0.54
TraesCS1A02G020000	8.82	8.06	8.19	8.35667	7.97	7.46	0	5.14333	7.94	5.97	0.15	4.68667	1.77	2.26	0.08	1.37	0.08	0.54	1	0.54
TraesCS5D02G490900	1.59	4.32	4.23	3.38	2.38	3.12	1.18	2.22667	0.45	0.4	2.27	1.04	0.89	0.61	0.3	0.6	1.48	0.14	0	0.54
TraesCS5D02G280300	0.05	0.23	0.26	0.18	0.08	0.27	0.29	0.213333	0.05	0.07	0.29	0.136667	0.15	0.34	0.34	0.276667	0.58	0.23	0.81	0.54
TraesCS6D02G358900	1.58	0.76	0.53	0.956667	4.68	7.91	6.96	6.51667	1.48	6.63	10.96	6.35667	0.33	1.57	2.47	1.45667	0.46	0.31	0.84	0.536667
TraesCS4A02G021400	0	0	0	0	0.03	0	0.03	0.02	0.56	0.13	0.12	0.27	0.4	0.55	0.05	0.333333	1.6	0.01	0	0.536667
TraesCS7A02G131500	0.01	0.06	0.02	0.03	2.13	0.7	0.23	1.02	2.91	2.21	0.03	1.71667	2.81	3.86	1.07	2.58	1.58	0.01	0.01	0.533333
TraesCS7A02G138000	0.02	0.03	0.07	0.04	0	0	0	0	0	0	0	0	0.07	0.31	1.68	0.686667	1.52	0.05	0.03	0.533333
TraesCS4A02G023000	0.72	0.5	0.48	0.566667	1.03	0.44	0.71	0.726667	0.64	0.58	0.24	0.486667	1.32	0.98	1.07	1.12333	0.77	0.26	0.56	0.53
TraesCS5D02G528500	0.04	0.07	0.11	0.0733333	0.85	1.84	3.25	1.98	3.6	3.82	4.46	3.96	0.45	1.37	2.46	1.42667	1.3	0.12	0.15	0.523333
TraesCS3D02G527400	0	0.01	0.01	0.00666667	1.31	1.56	0.14	1.00333	0.01	0.13	0.33	0.156667	1.47	1.58	0.81	1.28667	1.57	0	0	0.523333
TraesCS1D02G002800	0	0	0	0	0	0	0	0	0	0	0.05	0.0166667	0	0	0	0	1.57	0	0	0.523333
TraesCS7D02G143100	0.3	0.61	0.19	0.366667	1	0.8	0	0.6	0.88	0.59	0	0.49	1.56	1.51	1.96	1.67667	1.51	0.05	0	0.52
TraesCS6B02G056200	0.5	0.44	0.45	0.463333	2	1.35	1.66	1.67	2.48	2.02	1.43	1.97667	1.95	2.09	1.53	1.85667	1.36	0.17	0.02	0.516667
TraesCS4A02G017800	0.36	0.44	0.3	0.366667	0.83	0.64	0.56	0.676667	0.93	0.64	0.54	0.703333	1.01	0.44	0.8	0.75	0.66	0.11	0.78	0.516667
TraesCS1A02G025800	1.09	1.8	1.63	1.50667	0.12	0.24	0	0.12	0.48	0.03	0.17	0.226667	0.11	0.42	0.36	0.296667	0.58	0.15	0.82	0.516667
TraesCS6D02G352900	0.02	0	0.02	0.0133333	0.04	0.12	0.13	0.0966667	0.07	0.07	0.04	0.06	1.91	1.74	1.11	1.58667	1.49	0.05	0	0.513333
TraesCS6D02G370900	0.19	0.38	0.64	0.403333	1.61	1.26	3.33	2.06667	4.91	3.14	2.46	3.50333	1.3	2.12	1.32	1.58	1.32	0.06	0.16	0.513333
TraesCS6D02G346100	0.23	0.26	0.26	0.25	0.59	0.36	0.52	0.49	0.41	0.38	0.18	0.323333	1.12	1.38	1.23	1.24333	1.25	0.23	0.06	0.513333
TraesCS5A02G401900	1.44	0.69	0.83	0.986667	1.37	0.72	0.83	0.973333	1	0.59	0	0.53	1.9	0.97	0.65	1.17333	1.39	0.12	0.03	0.513333
TraesCS5A02G400200	2.12	2.17	2.06	2.11667	1.81	2.42	2.85	2.36	0.87	0.98	1.23	1.02667	1.28	2.35	2.17	1.93333	1.43	0.07	0.03	0.51
TraesCS6D02G347100	0.37	0.37	0.21	0.316667	0.72	0.6	0.56	0.626667	0.33	0.29	0.14	0.253333	1.25	1.31	1.2	1.25333	1.2	0.31	0.01	0.506667
TraesCS5D02G501900	1.97	2.04	2.03	2.01333	0.56	0.48	0.36	0.466667	0.23	0.26	0.26	0.25	0.14	0.25	0.39	0.26	1.24	0.04	0.22	0.5
TraesCS1A02G020700	1.55	1.12	1.23	1.3	1.4	0.94	0.71	1.01667	0.72	0.58	0.26	0.52	1.56	1.32	3.24	2.04	0.98	0.05	0.46	0.496667
TraesCS6D02G378900	1.2	0.86	0.99	1.01667	1.3	0.83	0.57	0.9	0.67	0.82	0.28	0.59	1.3	2.31	1.05	1.55333	0.62	0.04	0.83	0.496667
TraesCS6B02G055200	0	0	0	0	0	0	0	0	0	0	0	0	0	0	0	0	1.49	0	0	0.496667
TraesCS6D02G361800	0	0	0	0	0	0	0.17	0.0566667	0	0.05	0	0.0166667	0	0.11	8.24	2.78333	1.33	0.15	0	0.493333
TraesCS4A02G021200	0	0.23	0.1	0.11	0.06	0.12	0.26	0.146667	0.03	0.17	0.33	0.176667	0.7	0.48	1.04	0.74	0.5	0.2	0.78	0.493333
TraesCS5D02G558400	0.62	0.53	0.64	0.596667	0.39	0.37	0.41	0.39	0.48	0.19	0.91	0.526667	0.1	0.05	0.48	0.21	0.89	0.04	0.55	0.493333
TraesCS1D02G248500	0.91	1.44	1.63	1.32667	1.24	2.23	1.4	1.62333	1.54	1.01	0.64	1.06333	1.06	1.83	1.23	1.37333	1.32	0.02	0.13	0.49
TraesCS6D02G374100	0	0	0	0	0	0	0	0	0	0	0	0	0	0	0	0	1.03	0.37	0.06	0.486667
TraesCS5D02G544700	0.88	1.28	1.28	1.14667	1.54	1.16	0.37	1.02333	0.26	0.55	0.66	0.49	1.85	1.89	1.01	1.58333	0.59	0.1	0.76	0.483333
TraesCS5D02G481000	0.76	1.4	1.08	1.08	0.76	1.02	0.13	0.636667	0.13	0.77	4.14	1.68	2.04	0.94	0.86	1.28	1.45	0	0	0.483333
TraesCS5A02G404100	1	1.32	0.79	1.03667	1.99	2.57	0.03	1.53	0.71	0.59	0.03	0.443333	1.33	0.63	0.03	0.663333	1.11	0.28	0.05	0.48
TraesCS5D02G491500	1.15	2.56	2.54	2.08333	1.05	1.47	0	0.84	0.22	0.43	4.77	1.80667	0.73	0.17	0.56	0.486667	1.23	0.13	0.08	0.48
TraesCS1A02G021700	0	0.01	0	0.00333333	1	0.45	0.06	0.503333	0.52	0.64	0	0.386667	1.64	1.64	0.75	1.34333	1.22	0.02	0.19	0.476667
TraesCS5D02G497900	0	0	0	0	0.23	0.06	0.15	0.146667	0.37	0.29	0.25	0.303333	0.86	0.74	0.17	0.59	1.42	0	0.01	0.476667
TraesCS5D02G483400	0.59	0.6	0.64	0.61	0.81	0.78	0.89	0.826667	0.49	0.42	0.22	0.376667	0.88	1.25	1.28	1.13667	0.84	0.16	0.42	0.473333
TraesCS5D02G534700	0	0	0	0	0	0	0	0	0	0	0	0	0.21	0	0	0.07	1.42	0	0	0.473333
TraesCS6D02G359300	6.03	3.8	3.68	4.50333	1.07	2.81	0.05	1.31	1.43	2.46	4.93	2.94	0	0.13	1.96	0.696667	1.01	0.35	0.05	0.47
TraesCS5D02G478200	3.74	4.06	4.05	3.95	1.27	3.16	0.6	1.67667	0.81	1.25	1.22	1.09333	0.22	0.19	0.5	0.303333	1.35	0.04	0.02	0.47
TraesCS3D02G543900	1.87	2.25	2.32	2.14667	2.54	2.55	1.92	2.33667	1.08	1.04	0.58	0.9	2.07	2.34	1.63	2.01333	0.65	0.18	0.57	0.466667
TraesCS3D02G536600	3.51	6.43	5.54	5.16	5.22	6.14	6.65	6.00333	3.62	4.62	5.28	4.50667	3.75	5.6	6.46	5.27	1.12	0	0.26	0.46
TraesCS3D02G544800	0.64	0.63	0.61	0.626667	0.87	0.82	0.57	0.753333	0.66	0.44	0.25	0.45	1.03	0.87	1.28	1.06	0.67	0.15	0.55	0.456667
TraesCS6D02G370000	4.06	2.53	2.59	3.06	0.85	0.07	0	0.306667	5.75	3.34	0.11	3.06667	0	0	0.29	0.0966667	0.47	0.05	0.85	0.456667
TraesCS5A02G405200	0.65	1.6	1.16	1.13667	0.45	0.51	0.68	0.546667	0.16	0.22	1.08	0.486667	0.83	1.77	1.01	1.20333	1.01	0.09	0.26	0.453333
TraesCS5D02G543000	2.93	2.41	2.46	2.6	0.39	0.87	0	0.42	0.38	0.36	0.01	0.25	0.83	0.19	0.08	0.366667	1.31	0.03	0.01	0.45
TraesCS6D02G354500	0.45	1.2	1.1	0.916667	1.05	0.81	0.83	0.896667	0.21	0.84	0.37	0.473333	1.4	0.85	1.48	1.24333	1.17	0.04	0.13	0.446667
TraesCS6D02G395100	0.47	0.5	0.48	0.483333	0.56	0.26	0.6	0.473333	0.46	0.76	0.14	0.453333	0.79	0.39	0.71	0.63	0.47	0.04	0.83	0.446667
TraesCS6D02G379600	0.52	0.56	0.44	0.506667	0.55	0.32	0.25	0.373333	0.28	0.26	0.12	0.22	0.45	0.25	0.51	0.403333	0.57	0.04	0.73	0.446667
TraesCS5A02G396100	1.85	1.19	1.24	1.42667	1.99	0.53	0.08	0.866667	1.13	0.59	0	0.573333	1.5	0.92	0.33	0.916667	1.17	0.14	0	0.436667
TraesCS6D02G347600	0.44	0.35	0.3	0.363333	0.46	0.51	0.52	0.496667	0.14	0.22	0.36	0.24	0.7	0.73	1.17	0.866667	0.77	0.06	0.47	0.433333
TraesCS3D02G529900	3.35	3.82	3.82	3.66333	0.53	0.36	0.16	0.35	0.64	0.31	0.2	0.383333	0.6	0.19	0.95	0.58	0.94	0.12	0.24	0.433333
TraesCS6D02G365000	0.54	0.42	0.62	0.526667	0.75	0.52	0.49	0.586667	0.31	0.38	0.29	0.326667	0.92	0.85	1.08	0.95	0.74	0.15	0.4	0.43
TraesCS6D02G344700	0.02	0.13	0.1	0.0833333	0.83	1.57	2.32	1.57333	0.89	0.83	1	0.906667	2.09	1.49	1.73	1.77	0.9	0.2	0.18	0.426667
TraesCS5D02G491700	1.85	4.19	4.15	3.39667	3.43	3.87	0.33	2.54333	0.93	3.23	3.64	2.6	2.38	1.27	0.08	1.24333	1.21	0.07	0	0.426667
TraesCS5D02G476400	0.14	0.73	0.52	0.463333	0.07	0.23	0.01	0.103333	0.04	0.11	0.69	0.28	0.04	0.03	0.67	0.246667	0.87	0.16	0.25	0.426667
TraesCS1D02G002000	0	0	0	0	0	0	0	0	0	0	0	0	0	0	0	0	1.16	0.12	0	0.426667
TraesCS1A02G032700	1.01	0.88	0.91	0.933333	1.53	0.59	0.06	0.726667	0.7	0.67	0.04	0.47	1.69	0.91	0.62	1.07333	0.78	0.29	0.19	0.42
TraesCS3D02G540600	6.3	6.81	6.8	6.63667	3.62	3.91	3.73	3.75333	1.86	2.11	2.88	2.28333	0.14	0.38	1.28	0.6	0.9	0.36	0	0.42
TraesCS3D02G542800	0.19	0.61	0.54	0.446667	0.04	0.21	0.18	0.143333	0	0.06	0.24	0.1	0.28	0.26	0.64	0.393333	0.22	0.04	1	0.42
TraesCS5D02G482500	0.03	0	0	0.01	0	0	0.06	0.02	0	0	0	0	0	0	0.24	0.08	0.87	0.39	0	0.42
TraesCS5D02G530400	2.05	1.88	1.73	1.88667	2.37	1.31	0	1.22667	1.18	1.05	0.02	0.75	2.82	0.91	1.49	1.74	1.1	0.14	0	0.413333
TraesCS5D02G504700	0.77	1.03	1.05	0.95	0.9	0.63	0.55	0.693333	0.31	0.44	0.14	0.296667	0.97	0.74	0.7	0.803333	0.56	0.1	0.58	0.413333
TraesCS6D02G352700	0.53	0.53	0.61	0.556667	1.27	0.79	0.63	0.896667	0.73	0.66	0.28	0.556667	1.73	1.21	1.15	1.36333	0.85	0.07	0.31	0.41
TraesCS5D02G562900	0.75	0.42	0.31	0.493333	1.27	1.34	1.58	1.39667	0.68	0.66	0.29	0.543333	1.28	1.31	1.04	1.21	0.7	0.04	0.49	0.41
TraesCS1A02G018300	1.09	0.81	1.26	1.05333	1.95	1.18	0.6	1.24333	1.41	1.78	1.42	1.53667	1.2	1.05	0.33	0.86	1.01	0.04	0.18	0.41
TraesCS5D02G511900	0.08	0.09	0.21	0.126667	0.34	0.24	0.12	0.233333	0.21	0.1	0.17	0.16	0.77	0.29	0.25	0.436667	0.33	0.54	0.36	0.41
TraesCS3D02G540200	4.7	4.65	4.63	4.66	6.06	5.64	8.56	6.75333	4.99	5.15	0.59	3.57667	1.85	7.55	4.99	4.79667	1.22	0	0	0.406667
TraesCS5D02G522000	0.71	0.87	0.84	0.806667	0.9	0.6	0.43	0.643333	0.34	0.54	0.44	0.44	1.39	1.63	1.54	1.52	0.83	0.05	0.34	0.406667
TraesCS5D02G492200	0.57	0.46	0.49	0.506667	0.84	0.57	0.26	0.556667	0.35	0.27	0.18	0.266667	1.32	1.32	1.46	1.36667	0.8	0.12	0.3	0.406667
TraesCS5D02G472800	0	0.04	0.08	0.04	0.86	1.45	1.7	1.33667	1.29	1.42	1.3	1.33667	1.02	1.57	1.34	1.31	0.91	0.06	0.25	0.406667
TraesCS5D02G544500	0.67	0.71	0.65	0.676667	0.67	0.92	0.64	0.743333	0.47	0.53	0.45	0.483333	0.98	1.14	0.99	1.03667	0.93	0.13	0.16	0.406667
TraesCS1A02G026100	0.23	0.35	0.36	0.313333	0.19	0.58	0.69	0.486667	0.28	0.21	0.44	0.31	0.31	0.68	0.75	0.58	0.95	0.06	0.21	0.406667
TraesCS1A02G021400	0	0	0.22	0.0733333	0.16	0.58	2.18	0.973333	0	0.15	3.52	1.22333	0	0	1.66	0.553333	1.15	0.07	0	0.406667
TraesCS6D02G366600	1.88	2.53	2.47	2.29333	1.38	0.75	2.13	1.42	0.82	0.86	0.55	0.743333	1.72	1.99	1.71	1.80667	0.65	0.07	0.49	0.403333
TraesCS6B02G060500	0.25	0.19	0.22	0.22	0.12	0.27	0.21	0.2	0.22	0.07	0.2	0.163333	0.54	0.39	0.72	0.55	0.58	0.09	0.54	0.403333
TraesCS7D02G135900	0.67	0.73	0.74	0.713333	1.28	0.83	0.98	1.03	0.4	0.58	0.57	0.516667	1.81	1.67	1.48	1.65333	0.57	0.16	0.47	0.4
TraesCS7D02G139400	0.01	0.02	0.02	0.0166667	0.12	0	0.06	0.06	0.02	0.01	0.02	0.0166667	0.62	0.6	1.25	0.823333	0.85	0.23	0.11	0.396667
TraesCS5D02G505200	0	0	0	0	0	0	0	0	0	0	0	0	0.02	0	0	0.00666667	1.19	0	0	0.396667
TraesCS5D02G506600	0.57	0.58	0.7	0.616667	1.18	0.52	0.46	0.72	0.46	0.68	0.37	0.503333	1.42	1.07	1.43	1.30667	0.81	0.14	0.23	0.393333
TraesCS6D02G353500	0.22	0.25	0.42	0.296667	0.88	0.85	1.36	1.03	1.37	2.59	1.56	1.84	0.16	1.52	0.94	0.873333	0.81	0.16	0.21	0.393333
TraesCS6D02G349800	0.67	0.15	0.22	0.346667	0.57	1.02	1	0.863333	0.41	0.4	3.53	1.44667	0.1	0.57	1.57	0.746667	0.73	0.1	0.35	0.393333
TraesCS5D02G487200	0.01	0.22	0.37	0.2	0.1	0.16	0.07	0.11	0	0.07	0.12	0.0633333	0.01	0.09	0.14	0.08	0.14	0.34	0.7	0.393333
TraesCS6D02G344900	0.26	1.55	1.33	1.04667	2.11	3.62	4.98	3.57	2.47	2.63	5.4	3.5	0.59	3.55	4.65	2.93	0.97	0.19	0	0.386667
TraesCS5D02G537600	0.03	0	0.02	0.0166667	1.99	2.82	3.35	2.72	1.92	3.1	3.98	3	1.86	2.07	2.52	2.15	1.09	0.05	0.02	0.386667
TraesCS5A02G403800	1.13	2.78	2.27	2.06	2.47	2.47	2.53	2.49	0.73	1.56	4.24	2.17667	1.45	1.81	2.09	1.78333	0.79	0.36	0.01	0.386667
TraesCS5A02G396600	1.12	0.84	0.74	0.9	1.32	0.46	0	0.593333	0.63	0.49	0.02	0.38	2.4	0.76	0.68	1.28	1.06	0.07	0.03	0.386667
TraesCS6D02G386000	0.23	0.47	0.36	0.353333	0.44	0.29	0.24	0.323333	0.13	0.09	0.36	0.193333	0.22	0.25	0.44	0.303333	0.49	0.31	0.36	0.386667
TraesCS5D02G507600	3.7	4.59	4.29	4.19333	0.05	1.21	0.11	0.456667	0.13	0.67	2.15	0.983333	0.23	0.19	0.08	0.166667	0.87	0.29	0	0.386667
TraesCS6D02G356900	0.37	1.25	1.22	0.946667	1.27	1.95	0.69	1.30333	0.38	1.47	0.78	0.876667	1.77	1.25	1.04	1.35333	0.63	0.05	0.47	0.383333
TraesCS4A02G025700	0.34	0.25	0.4	0.33	0.36	0.38	0.49	0.41	0.3	0.34	0.37	0.336667	0.43	0.79	0.82	0.68	0.36	0.11	0.68	0.383333
TraesCS5A02G395900	0.02	0.11	0.11	0.08	0.27	0.07	0	0.113333	0	0	0.03	0.01	0	0	0	0	1.11	0.04	0	0.383333
TraesCS6D02G363100	3.84	3.31	3.41	3.52	1.41	0.83	0.08	0.773333	0.24	1.31	4.29	1.94667	1.56	2.84	2.32	2.24	1.1	0.04	0	0.38
TraesCS6D02G346000	0.27	0.27	0.22	0.253333	0.65	0.53	0.36	0.513333	0.15	0.26	0.08	0.163333	1.19	1	0.89	1.02667	0.81	0.32	0.01	0.38
TraesCS4A02G016300	2.15	2.73	2.62	2.5	0.7	0.67	0.46	0.61	0.17	0.25	0.24	0.22	0.73	0.82	0.79	0.78	0.87	0.13	0.14	0.38
TraesCS3D02G542600	1.23	1.94	1.73	1.63333	0.24	0.52	0.73	0.496667	0.18	0.92	1.72	0.94	0.5	0.33	0.76	0.53	0.32	0.03	0.79	0.38
TraesCS5D02G489300	1.67	2.2	2.13	2	1.25	1.09	0.43	0.923333	0.8	0.75	0.78	0.776667	0.36	0.51	0.73	0.533333	1.06	0.03	0.04	0.376667
TraesCS6D02G353000	1.7	2.22	2.29	2.07	0.13	0.14	0	0.09	0.02	0.08	0.4	0.166667	0.06	0.15	0.47	0.226667	0.93	0.03	0.17	0.376667
TraesCS1A02G018800	0.18	0.23	0.21	0.206667	0.33	0.25	0.41	0.33	0.13	0.21	0.41	0.25	0.27	0.42	0.83	0.506667	0.47	0.05	0.6	0.373333
TraesCS6D02G367700	7.31	6.78	6.86	6.98333	2.39	2.04	0.08	1.50333	1.52	1	0.72	1.08	0.3	0	0.07	0.123333	0.7	0.12	0.3	0.373333
TraesCS6D02G385600	3.97	3.53	3.78	3.76	2.94	4.4	4.81	4.05	3.26	3.91	3.84	3.67	1.3	3.19	1.39	1.96	0.94	0.04	0.13	0.37
TraesCS6D02G387400	0	0	0.01	0.00333333	0.87	0.21	0	0.36	0.29	0.33	0	0.206667	2.05	2.02	1.06	1.71	0.84	0	0.27	0.37
TraesCS5A02G400800	0.56	0.5	0.46	0.506667	1.06	0.65	0.62	0.776667	0.68	0.65	0.21	0.513333	1.4	1.01	1.48	1.29667	0.77	0.08	0.26	0.37
TraesCS5D02G523900	0.01	0.33	0.22	0.186667	0.76	1.02	1.18	0.986667	0.32	0.79	0.69	0.6	0.99	1.06	1.52	1.19	0.98	0.06	0.07	0.37
TraesCS1D02G249200	0.73	0.98	0.82	0.843333	0.9	1.28	2.43	1.53667	0.27	0.81	2.54	1.20667	0.65	1.03	1.2	0.96	0.03	0.11	0.97	0.37
TraesCS5D02G510300	0	0	0	0	0.03	0.01	0.14	0.06	0	0	0	0	0.19	0.54	0.96	0.563333	0.9	0.12	0.09	0.37
TraesCS5D02G562600	0.34	0.58	0.49	0.47	1.02	1.01	1.17	1.06667	0.55	0.51	0.39	0.483333	0.94	0.71	0.84	0.83	0.54	0.07	0.49	0.366667
TraesCS5D02G539300	0	0.22	0.21	0.143333	0.21	0.43	0.14	0.26	0.18	0.22	0	0.133333	0	0	0.38	0.126667	0.53	0	0.57	0.366667
TraesCS5A02G397000	1.47	1.35	1.24	1.35333	1.96	0.83	0.14	0.976667	0.77	0.96	0.03	0.586667	2.37	0.82	0.98	1.39	0.99	0.05	0.05	0.363333
TraesCS5D02G500200	0.57	0.71	0.74	0.673333	0.98	0.74	0.82	0.846667	0.46	0.43	0.5	0.463333	1.22	1.27	0.94	1.14333	0.65	0.08	0.36	0.363333
TraesCS1D02G251400	0.29	0.71	0.65	0.55	0.3	0.13	0.11	0.18	0.24	0.27	0.61	0.373333	0.55	0.5	0.12	0.39	1.01	0.01	0.07	0.363333
TraesCS5D02G514700	0.03	0	0.04	0.0233333	0.26	0.58	0.09	0.31	0.6	1.51	1.1	1.07	0.07	0.11	0.15	0.11	0.16	0.09	0.84	0.363333
TraesCS4A02G023100	0.94	0.7	0.65	0.763333	1.31	0.55	0.08	0.646667	0.43	0.48	0.03	0.313333	1.78	0.49	0.71	0.993333	0.77	0.1	0.21	0.36
TraesCS6B02G051200	0.01	0.17	0.08	0.0866667	0.67	0.86	0.6	0.71	0.02	0.07	0.11	0.0666667	0.91	0.61	0.93	0.816667	0.92	0.1	0.06	0.36
TraesCS6D02G349700	0.32	0.31	0.18	0.27	0.19	0.18	0.49	0.286667	0.22	0.08	1.87	0.723333	0.15	0.77	1.19	0.703333	0.49	0.39	0.19	0.356667
TraesCS5D02G507800	3.97	5.03	5.03	4.67667	0.12	0.4	0	0.173333	0	0.15	1.45	0.533333	0.28	0.06	0.17	0.17	1.06	0.01	0	0.356667
TraesCS6D02G380300	0.71	0.53	0.44	0.56	0.68	0.5	0.44	0.54	0.69	0.53	0.6	0.606667	0.64	0.46	1.58	0.893333	0.66	0.16	0.24	0.353333
TraesCS6D02G346800	0.5	1.12	1.23	0.95	0.53	0.4	0.07	0.333333	0.03	0.74	0.44	0.403333	1.4	1.3	0.34	1.01333	1	0.01	0.04	0.35
TraesCS6B02G051800	0.95	2.08	2.05	1.69333	0.66	0.54	1.56	0.92	0.81	0.82	2.38	1.33667	0.43	0.83	1.28	0.846667	0.94	0.1	0.01	0.35
TraesCS5D02G505300	1.5	3.77	3.37	2.88	1.49	1.39	0.72	1.2	0.96	1.43	2.1	1.49667	2.2	1.03	1.05	1.42667	0.75	0.15	0.13	0.343333
TraesCS5D02G523300	0.34	0.66	0.69	0.563333	0.94	0.5	0.67	0.703333	0.39	0.35	0.1	0.28	0.9	1.94	1.05	1.29667	0.77	0.09	0.17	0.343333
TraesCS1A02G027800	0	0.02	0.02	0.0133333	0	0	0	0	0	0	0.03	0.01	0.08	0.14	0.11	0.11	0.72	0.14	0.16	0.34
TraesCS6B02G052500	0	0	0	0	0	0	0	0	0	0	0	0	0	0	0	0	1.02	0	0	0.34
TraesCS5D02G516800	2.81	3.46	3.46	3.24333	1.88	2.5	0.85	1.74333	0.79	1.16	1.43	1.12667	2.45	1.86	0.17	1.49333	0.9	0.11	0	0.336667
TraesCS5D02G483500	1.19	3.19	2.91	2.43	1.02	1.13	1.13	1.09333	0.22	0.53	0.22	0.323333	0.79	0.7	1.11	0.866667	0.1	0.31	0.6	0.336667
TraesCS6B02G053600	0	0	0	0	0.18	0	0	0.06	0	0.02	0.02	0.0133333	0.39	0.78	0.91	0.693333	0.99	0	0.02	0.336667
TraesCS6D02G389000	0.03	0	0	0.01	0	0	0	0	0	0	0.03	0.01	0.03	0	0	0.01	0.04	0.88	0.09	0.336667
TraesCS5A02G398400	0.03	0.04	0.1	0.0566667	0.11	0.22	0.21	0.18	0.01	0	0.05	0.02	0.54	0.62	0.86	0.673333	0.79	0.09	0.12	0.333333
TraesCS5D02G477900	0	0	0	0	0	0	0	0	0	0	0	0	0	0	0	0	0.97	0.03	0	0.333333
TraesCS5D02G524600	2.21	1.58	1.67	1.82	1.74	3.1	2.1	2.31333	1.19	1.28	0.19	0.886667	0.13	1.66	0.51	0.766667	0.94	0.02	0.03	0.33
TraesCS5D02G478700	1.16	1.07	0.96	1.06333	0.08	0.19	0.02	0.0966667	0.18	0.09	0.62	0.296667	0.01	0.04	0.1	0.05	0.91	0.08	0	0.33
TraesCS3D02G544700	0.22	0.26	0.24	0.24	0.37	0.41	0.37	0.383333	0.25	0.15	0.14	0.18	0.76	0.43	1.99	1.06	0.77	0.07	0.14	0.326667
TraesCS6D02G363000	0.07	0.05	0.05	0.0566667	0.05	0.06	0.08	0.0633333	0.08	0.04	0.11	0.0766667	0.24	0.34	1.15	0.576667	0.75	0.08	0.15	0.326667
TraesCS3D02G545600	0	0	0	0	0	0	0	0	0	0	0	0	0	0	0	0	0.06	0.92	0	0.326667
TraesCS3D02G536700	3.65	6.65	6.29	5.53	5.69	6.74	5.65	6.02667	3.4	4.91	6.31	4.87333	3.89	6.11	5.69	5.23	0.77	0.2	0	0.323333
TraesCS3D02G539400	0.57	0.8	0.92	0.763333	1.17	0.68	0.74	0.863333	0.37	0.73	0.13	0.41	1.58	1.58	1.44	1.53333	0.76	0.09	0.12	0.323333
TraesCS6B02G060000	0.2	0.4	0.52	0.373333	0.69	0.78	0.82	0.763333	0.15	0.65	1.16	0.653333	0.81	0.73	1.08	0.873333	0.92	0.04	0.01	0.323333
TraesCS5A02G402200	0.49	0.89	0.84	0.74	0.25	0.28	0.56	0.363333	0.15	0.42	0.71	0.426667	0.76	0.49	0.62	0.623333	0.23	0.03	0.71	0.323333
TraesCS6D02G378800	0.49	0.24	0.38	0.37	0.67	0.33	0.22	0.406667	0.43	0.35	0.07	0.283333	0.76	0.38	0.51	0.55	0.36	0.04	0.57	0.323333
TraesCS5D02G278800	0.34	0.4	0.46	0.4	0.58	0.36	0.33	0.423333	0.54	0.53	0.51	0.526667	0.9	6.67	0.59	2.72	0.49	0.03	0.44	0.32
TraesCS6D02G353900	0.38	0.39	0.48	0.416667	1.03	0.53	0.42	0.66	0.24	0.34	0.17	0.25	0.81	0.66	0.8	0.756667	0.66	0.07	0.23	0.32
TraesCS7D02G144900	0.21	0.24	0.44	0.296667	0.47	0.68	0.98	0.71	0.5	0.65	0.54	0.563333	0.31	0.39	1.06	0.586667	0.64	0.12	0.2	0.32
TraesCS5A02G404300	1.67	1.81	1.76	1.74667	2.27	1.21	0.18	1.22	0.73	0.88	0.1	0.57	2.91	1.94	1.36	2.07	0.78	0.1	0.07	0.316667
TraesCS5D02G284300	0.02	0	0.03	0.0166667	0.1	0.88	0.32	0.433333	0.03	0.07	0.56	0.22	0	0.19	1.02	0.403333	0.59	0.06	0.3	0.316667
TraesCS5D02G534300	1.99	2.63	2.59	2.40333	1.84	2.12	1.77	1.91	0.45	0.72	0.76	0.643333	0.74	1.81	1.36	1.30333	0.91	0.03	0	0.313333
TraesCS1A02G026000	1.75	1.62	1.38	1.58333	1.3	0.45	0.52	0.756667	0.52	0.19	0.03	0.246667	0.23	0.49	0.59	0.436667	0.74	0.12	0.08	0.313333
TraesCS5D02G564000	3.51	4.06	4.15	3.90667	0.63	1.29	0.73	0.883333	0.3	0.06	0.56	0.306667	0	0.03	0.03	0.02	0.05	0.03	0.86	0.313333
TraesCS3D02G528300	1.9	1.6	1.49	1.66333	1.09	0.89	0.96	0.98	0.41	0.4	0.39	0.4	0.83	1.2	1.51	1.18	0.84	0.07	0.02	0.31
TraesCS6D02G386900	1.9	1.58	1.73	1.73667	0.65	1.56	0.83	1.01333	0.26	0.25	0.08	0.196667	0.74	0.46	0.59	0.596667	0.8	0.03	0.1	0.31
TraesCS6D02G344300	0.46	0.41	0.51	0.46	0.7	0.65	0.32	0.556667	0.16	0.28	0.27	0.236667	0.75	0.62	0.88	0.75	0.78	0.02	0.12	0.306667
TraesCS5D02G537200	0.13	0.08	0.06	0.09	0.02	0.17	0.36	0.183333	0.51	0.59	1.18	0.76	0.03	0.04	0.42	0.163333	0.83	0.03	0.06	0.306667
TraesCS7D02G145600	0.74	0.8	0.93	0.823333	0.38	0.37	0.01	0.253333	2.11	1.4	0	1.17	0.01	0.28	0.02	0.103333	0.3	0.23	0.39	0.306667
TraesCS7A02G136500	0.97	1.89	1.77	1.54333	0.77	0.74	0	0.503333	0.94	0.46	0.07	0.49	0.01	0.06	0.2	0.09	0.92	0	0	0.306667
TraesCS4A02G019400	0.04	0.1	0.14	0.0933333	0.04	0.94	4.03	1.67	0.44	0.23	0.12	0.263333	0.32	6.75	0.61	2.56	0.88	0.03	0	0.303333
TraesCS4A02G025100	0.03	0.02	0.02	0.0233333	0.04	0.03	0.02	0.03	0.03	0.01	0.19	0.0766667	0.19	0.53	1.45	0.723333	0.12	0.2	0.58	0.3
TraesCS6D02G356500	0.27	0.37	0.36	0.333333	0.55	0.26	0.19	0.333333	0.22	0.25	0.09	0.186667	0.73	0.48	0.59	0.6	0.37	0.07	0.46	0.3
TraesCS7D02G142200	1.49	1.64	1.62	1.58333	0.12	0.31	0.18	0.203333	0.27	0.11	0.2	0.193333	0.11	0.26	1.09	0.486667	0.31	0.14	0.45	0.3
TraesCS1A02G015900	0.39	0.59	0.74	0.573333	0.66	1.72	1.05	1.14333	0.52	2.35	0.82	1.23	0.27	0.15	0.31	0.243333	0.77	0.03	0.1	0.3
TraesCS1D02G000900	0	0	0.32	0.106667	0	0	0	0	0.52	0.3	0	0.273333	0	0	0.27	0.09	0.53	0.1	0.27	0.3
TraesCS6D02G355800	1.74	1.03	0.96	1.24333	0.2	0.21	0.11	0.173333	0.73	0.24	0.02	0.33	0.04	0.61	3.27	1.30667	0.86	0.03	0	0.296667
TraesCS4A02G022400	0	0	0	0	0	0	0	0	0	0	0	0	0	0	0	0	0.89	0	0	0.296667
TraesCS1A02G026900	0.28	0.09	0.35	0.24	1.04	0.77	0.52	0.776667	0.46	0.46	0.66	0.526667	0.91	0.88	0.77	0.853333	0.22	0.1	0.56	0.293333
TraesCS5A02G401800	1.44	1.05	1.16	1.21667	1.5	0.37	0	0.623333	0.23	0.28	0	0.17	1.66	0.19	0.04	0.63	0.02	0.07	0.79	0.293333
TraesCS6D02G344800	0	0	0	0	0	0	0	0	0	0	0	0	0	0	1.28	0.426667	0.88	0	0	0.293333
TraesCS5D02G475100	0	0	0	0	0	0	0	0	0	0	0	0	0	0	0	0	0.88	0	0	0.293333
TraesCS1A02G024600	1.93	2.05	1.84	1.94	2.21	1.24	0.62	1.35667	0.78	2.13	2.18	1.69667	2.11	2	0.72	1.61	0.46	0.32	0.09	0.29
TraesCS5D02G496500	0.21	0.31	0.33	0.283333	0.94	0.97	1.98	1.29667	2.53	1.89	1.3	1.90667	0.97	1.19	0.96	1.04	0.65	0.06	0.16	0.29
TraesCS6D02G347200	0.07	0.07	0.09	0.0766667	0.32	0.32	0.54	0.393333	0.12	0.17	0.06	0.116667	0.62	0.89	0.96	0.823333	0.7	0.15	0.02	0.29
TraesCS5D02G545300	0.29	0.2	0.31	0.266667	0.5	0.34	0.3	0.38	0.16	0.26	2.17	0.863333	0.62	0.35	0.36	0.443333	0.33	0.06	0.48	0.29
TraesCS5D02G556400	0.08	0.1	0.18	0.12	0.53	0.39	1.22	0.713333	1.99	1.04	0.79	1.27333	0.48	0.47	0.59	0.513333	0.46	0.09	0.31	0.286667
TraesCS5D02G543100	0.46	1.02	0.66	0.713333	0.55	0.35	0.33	0.41	0.35	0.35	0.08	0.26	0.16	0.44	0.79	0.463333	0.61	0.08	0.17	0.286667
TraesCS6D02G351000	0	0	0	0	0.02	0.02	0	0.0133333	0.03	0.03	0	0.02	0.31	0.31	0.57	0.396667	0.84	0.02	0	0.286667
TraesCS4A02G027600	0.03	0.31	0.05	0.13	0	0.1	0.13	0.0766667	0	0.07	0	0.0233333	0.06	0.07	0.28	0.136667	0.07	0.11	0.68	0.286667
TraesCS6D02G385000	0	0	0.08	0.0266667	0.22	0	0	0.0733333	0	0.1	0.08	0.06	0.67	0.23	0.08	0.326667	0.8	0	0.04	0.28
TraesCS5D02G285100	0.05	0.01	0.02	0.0266667	0.03	0.11	0.26	0.133333	0	0.06	0.17	0.0766667	0.59	1.05	1.9	1.18	0.78	0.04	0.01	0.276667
TraesCS5D02G539600	0.13	0.44	0.37	0.313333	0.22	0.15	0.44	0.27	0.1	0.24	0.21	0.183333	0.6	0.58	1.22	0.8	0.45	0.08	0.3	0.276667
TraesCS7D02G134400	0.53	0.49	0.42	0.48	0.9	0.4	0.29	0.53	0.33	0.46	0.11	0.3	1.02	0.49	0.75	0.753333	0.49	0.07	0.27	0.276667
TraesCS5D02G549400	0.01	0.09	0.09	0.0633333	0.11	0.3	0.67	0.36	0.21	0.8	1.23	0.746667	0.34	0.63	0.84	0.603333	0.8	0.02	0.01	0.276667
TraesCS6D02G366100	0.21	0.32	0.24	0.256667	0.17	0.35	0	0.173333	0.04	0.04	0.06	0.0466667	0.43	0.08	0.04	0.183333	0.73	0.1	0	0.276667
TraesCS5D02G558600	0.35	0.24	0.35	0.313333	0.68	0.32	0.25	0.416667	0.21	0.28	0.2	0.23	0.82	0.49	1.82	1.04333	0.42	0.02	0.38	0.273333
TraesCS5A02G396200	0.37	0.55	0.65	0.523333	0.96	0.54	0.64	0.713333	0.23	0.41	0.29	0.31	0.87	1.12	0.75	0.913333	0.26	0.12	0.44	0.273333
TraesCS5D02G494200	0.17	0.51	0.51	0.396667	0.58	0.58	0.73	0.63	0.35	0.54	0.57	0.486667	0.6	0.68	0.92	0.733333	0.35	0.04	0.43	0.273333
TraesCS1A02G021300	0.1	0.19	0	0.0966667	0.78	0	0.12	0.3	0.71	0.15	0.24	0.366667	0	0.95	0.54	0.496667	0.82	0	0	0.273333
TraesCS6B02G061000	0.71	2.43	2.19	1.77667	0.31	0.45	0.86	0.54	0.03	0.01	0.02	0.02	0.02	0.03	0	0.0166667	0.82	0	0	0.273333
TraesCS7A02G132600	0.72	0.73	0.63	0.693333	0.94	0.34	0.06	0.446667	0.27	0.41	0.13	0.27	1.35	0.43	0.54	0.773333	0.35	0.03	0.43	0.27
TraesCS1A02G016000	0.34	0.34	0.38	0.353333	0.54	0.67	0.62	0.61	0.26	0.42	0.44	0.373333	0.48	0.97	0.73	0.726667	0.51	0.05	0.25	0.27
TraesCS5D02G512000	0	0.03	0.02	0.0166667	0.31	0.24	0.01	0.186667	1.28	0.89	0	0.723333	0.07	0.18	0.08	0.11	0.04	0.07	0.7	0.27
TraesCS6B02G058100	0	0	0	0	0	0	0	0	0	0	0	0	0	0.11	0.1	0.07	0.7	0.06	0.05	0.27
TraesCS5D02G285700	1.82	2.52	2.26	2.2	1.99	3.87	6.92	4.26	0.41	0.64	0.38	0.476667	1.33	4.29	3.23	2.95	0.72	0.08	0	0.266667
TraesCS7A02G133100	0.49	0.41	0.45	0.45	0.97	0.75	1.45	1.05667	2.01	1.34	1.1	1.48333	1	1.13	1.12	1.08333	0.58	0.05	0.16	0.263333
TraesCS5D02G513900	1.36	1.88	1.91	1.71667	0.93	1.69	1.03	1.21667	0.36	0.83	1.06	0.75	0.24	0.65	0.61	0.5	0.24	0.55	0	0.263333
TraesCS7A02G137900	0	0.07	0	0.0233333	0.06	0.04	0.07	0.0566667	0.09	0	0	0.03	0.15	0.22	0.7	0.356667	0.57	0.08	0.14	0.263333
TraesCS7A02G132900	2.29	3.63	3.79	3.23667	0.44	1.32	0.22	0.66	0.64	1.2	0.08	0.64	0.36	0.4	0.43	0.396667	0.7	0.08	0	0.26
TraesCS5D02G475500	0	0	0	0	0	0	0	0	0	0	0	0	0	0	0	0	0.78	0	0	0.26
TraesCS5D02G536400	0.42	0.31	0.28	0.336667	0.31	0.27	0	0.193333	0.59	1.15	0.33	0.69	0.03	0.9	1.1	0.676667	0.37	0.4	0	0.256667
TraesCS4A02G019500	0.3	0.55	0.36	0.403333	0.72	0.44	0.39	0.516667	0.16	0.33	0.1	0.196667	0.75	0.53	0.63	0.636667	0.57	0.05	0.15	0.256667
TraesCS5D02G498800	1.23	2.74	2.4	2.12333	0.04	2.08	0.29	0.803333	0.09	0.37	0.06	0.173333	0.06	0.18	1.01	0.416667	0.05	0.67	0.05	0.256667
TraesCS5D02G518000	0	0	0	0	0	0	0	0	0	0	0	0	0	0	0.02	0.00666667	0	0.36	0.41	0.256667
TraesCS5D02G513500	0.14	0.38	0.29	0.27	0.46	0.33	0.44	0.41	0.38	0.38	0.14	0.3	0.33	0.35	0.78	0.486667	0.12	0.02	0.62	0.253333
TraesCS5D02G517700	0.29	0.34	0.32	0.316667	0.56	0.29	0.13	0.326667	0.21	0.22	0.03	0.153333	0.78	0.25	0.32	0.45	0.38	0.02	0.36	0.253333
TraesCS6D02G367500	0.31	0.27	0.25	0.276667	0.34	0.34	0.37	0.35	0.28	0.32	0.09	0.23	0.44	0.41	0.58	0.476667	0.26	0.02	0.47	0.25
TraesCS7D02G146900	0.05	0.08	0.13	0.0866667	0.14	0.2	0.02	0.12	0.01	0.05	0.11	0.0566667	0.11	0.36	0.29	0.253333	0.57	0.07	0.11	0.25
TraesCS3D02G545200	0.04	0.17	0.15	0.12	0.56	1.02	0.25	0.61	4.18	0.27	0	1.48333	0.02	0.29	0.09	0.133333	0.73	0.01	0.01	0.25
TraesCS7A02G135200	0	0	0	0	0	0	0	0	0	0	0	0	0.01	0	0	0.00333333	0.06	0.67	0.02	0.25
TraesCS7D02G134700	0.17	0.14	0.04	0.116667	1.81	1.14	0.16	1.03667	0.53	0.55	0.43	0.503333	1.64	0.86	0.53	1.01	0.35	0.17	0.22	0.246667
TraesCS5D02G512700	0.21	0.35	0.4	0.32	0.29	0.41	0.34	0.346667	0.33	0.34	0.37	0.346667	0.7	0.5	0.75	0.65	0.31	0.03	0.4	0.246667
TraesCS5D02G511300	0	0	0	0	0.03	0.02	0.03	0.0266667	0.03	0	0	0.01	0.03	0	0	0.01	0.07	0.5	0.17	0.246667
TraesCS1A02G014200	0	0	0	0	0	0	0	0	0	0	0	0	0	0	0.02	0.00666667	0.32	0.17	0.25	0.246667
TraesCS5D02G471800	0.25	0.3	0.09	0.213333	1.83	0.52	0.08	0.81	0.26	0.35	0	0.203333	1.93	1.09	0.61	1.21	0.68	0.02	0.03	0.243333
TraesCS6D02G386800	0.5	2.97	2.67	2.04667	0.7	1.63	0	0.776667	0	1.67	3.73	1.8	0	0.04	2.04	0.693333	0.18	0.38	0.17	0.243333
TraesCS6D02G364100	1.47	1.9	2.15	1.84	0.19	0.48	0.93	0.533333	0.1	0.22	0.25	0.19	0.21	0.2	0.33	0.246667	0.12	0.13	0.48	0.243333
TraesCS5D02G545800	4.11	4.27	4.35	4.24333	0.77	2.52	0.02	1.10333	0.36	1.07	0.35	0.593333	0.15	0.05	0.06	0.0866667	0.73	0	0	0.243333
TraesCS5D02G498700	1.34	2.82	2.67	2.27667	0.5	3.04	1.27	1.60333	0.53	1.04	0.84	0.803333	0.46	0.47	2	0.976667	0.33	0.33	0.06	0.24
TraesCS6D02G372700	0.32	0.72	0.84	0.626667	0.35	0.25	0.22	0.273333	0.15	0.15	0.09	0.13	0.45	0.16	0.3	0.303333	0.28	0.02	0.42	0.24
TraesCS5D02G489713	0.01	0.03	0	0.0133333	0	0	0	0	0	0	0	0	0.02	0	0.04	0.02	0.02	0.04	0.66	0.24
TraesCS6B02G061300	0	0	0	0	0.05	0	0	0.0166667	0	0	0	0	0.03	0	0	0.01	0.42	0.16	0.14	0.24
TraesCS7A02G134200	1.9	0.94	0.96	1.26667	0.57	0.26	0.07	0.3	0.59	0.32	0.08	0.33	0.92	0.26	0.43	0.536667	0.44	0.06	0.21	0.236667
TraesCS6B02G052300	0.88	1.07	1.06	1.00333	0.34	0.26	0.56	0.386667	0.77	0.71	1.01	0.83	0.04	0.32	0.81	0.39	0.66	0.05	0	0.236667
TraesCS5D02G278900	0.15	0.31	0.11	0.19	0.23	0.27	0.42	0.306667	0.51	0.17	0.4	0.36	0.15	0.86	0.11	0.373333	0	0.07	0.64	0.236667
TraesCS6B02G057149	0	0.1	0.07	0.0566667	0	0	0.03	0.01	0	0.03	0.03	0.02	0	0.03	0.13	0.0533333	0.61	0.1	0	0.236667
TraesCS3D02G533500	1.74	0.95	1.18	1.29	0.1	0.16	0.1	0.12	0.06	0.21	0.13	0.133333	0.2	0.13	0.3	0.21	0.22	0.01	0.47	0.233333
TraesCS5D02G487600	0.03	0.21	0.09	0.11	0.03	0.2	0	0.0766667	0.03	0.55	1.13	0.57	0.03	0.06	0.09	0.06	0.41	0.09	0.2	0.233333
TraesCS5D02G556100	0	0	0	0	0	0	0	0	0	0	0	0	0	0	0	0	0.2	0.42	0.08	0.233333
TraesCS5D02G533700	0.02	0.01	0.03	0.02	0.87	0.9	0.88	0.883333	0.53	1.25	2.16	1.31333	0.7	0.69	0.79	0.726667	0.62	0.02	0.05	0.23
TraesCS5D02G544600	0	0.04	0	0.0133333	0.37	0.96	1.86	1.06333	1.84	2.57	2.15	2.18667	0.37	0.47	0.45	0.43	0.6	0.09	0	0.23
TraesCS6D02G350400	0	0	0	0	0.03	0	0	0.01	0.04	0.08	0	0.04	0.17	0.24	0.38	0.263333	0.69	0	0	0.23
TraesCS6D02G377300	0	0	0.03	0.01	0	0	0	0	0	0	0	0	0.01	0	0.01	0.00666667	0.11	0.39	0.19	0.23
TraesCS5D02G541800	0	0	0	0	0	0	0	0	0	0	0	0	0	0	0	0	0.2	0.47	0.02	0.23
TraesCS5D02G499000	0.13	0.15	0.12	0.133333	0.08	0.31	0.09	0.16	0.09	0.1	0.18	0.123333	0.52	0.48	0.3	0.433333	0.58	0.08	0.02	0.226667
TraesCS4A02G022700	2.48	3.23	3.12	2.94333	1.74	3.38	2.98	2.7	1.79	1.88	1.48	1.71667	1.06	2.63	2.47	2.05333	0.64	0.01	0.02	0.223333
TraesCS1D02G249600	1.68	6.96	5.79	4.81	0.83	1.1	0.09	0.673333	0.14	0.14	0.12	0.133333	0.27	0.31	0.04	0.206667	0.2	0.2	0.27	0.223333
TraesCS6D02G367100	1.33	1.9	1.63	1.62	0.07	0.9	0.03	0.333333	0.33	1.05	0.38	0.586667	0.36	0.03	0.12	0.17	0.67	0	0	0.223333
TraesCS6D02G364300	0.05	0.14	0.11	0.1	0.01	0.05	0.09	0.05	0.06	0.21	0.46	0.243333	0.03	0.22	0.21	0.153333	0.37	0.11	0.19	0.223333
TraesCS6D02G371000	0.02	0.03	0.04	0.03	0.82	0.92	1.46	1.06667	2.83	2.72	2.07	2.54	0.55	1.16	0.51	0.74	0.61	0.05	0	0.22
TraesCS6B02G053300	0.22	0	0	0.0733333	0	0	0	0	0	0	0	0	0.96	1.81	2.98	1.91667	0.65	0	0	0.216667
TraesCS5D02G473900	0.05	0.1	0	0.05	0.06	0.04	0.22	0.106667	0.3	0.03	0.22	0.183333	0.5	0.48	0.47	0.483333	0.48	0.08	0.09	0.216667
TraesCS5D02G541000	0	0	0	0	0	0	0	0	0	0	0	0	0	0	0	0	0.65	0	0	0.216667
TraesCS7D02G147900	0.45	0.9	0.68	0.676667	0.82	0.41	0.3	0.51	0.13	1.06	1.72	0.97	0.43	0.87	0.32	0.54	0.35	0.07	0.21	0.21
TraesCS7D02G138700	0	0.01	0.06	0.0233333	0.24	0.07	0	0.103333	0.01	0.02	0	0.01	0.24	0.41	0.6	0.416667	0.61	0.01	0.01	0.21
TraesCS3D02G529300	0.22	0.12	0.28	0.206667	0.24	0.33	0.21	0.26	0.17	0.21	0.13	0.17	0.49	0.18	0.3	0.323333	0.2	0.03	0.4	0.21
TraesCS6D02G357000	0	0.2	0.12	0.106667	0.13	0	0.1	0.0766667	0	0.02	0.03	0.0166667	0	0	0.08	0.0266667	0	0.02	0.61	0.21
TraesCS6D02G373000	0.03	0	0.02	0.0166667	3.1	2.23	0.23	1.85333	0.69	1.03	0.01	0.576667	2.69	2.41	0.88	1.99333	0.58	0.04	0	0.206667
TraesCS4A02G020900	1.55	0.92	0.98	1.15	0.46	1.84	1.71	1.33667	2.17	1.89	0.37	1.47667	1.05	0.14	0.19	0.46	0.58	0.03	0	0.203333
TraesCS3D02G540800	0.6	0.7	0.75	0.683333	0	0.11	0.46	0.19	0.39	0.73	2.1	1.07333	0	0	0.96	0.32	0.59	0.02	0	0.203333
TraesCS5D02G475800	0.41	1.03	0.92	0.786667	0.08	0.05	0.13	0.0866667	0.07	0.29	1.19	0.516667	0	0.08	0.24	0.106667	0.06	0.05	0.5	0.203333
TraesCS5D02G526200	0.05	0.02	0.21	0.0933333	1.14	0.94	0.08	0.72	0.16	0.18	0.34	0.226667	0.14	0.06	0.06	0.0866667	0.11	0.01	0.49	0.203333
TraesCS6B02G061400	0	0	0	0	0	0	0	0	0.02	0	0	0.00666667	0	0	0	0	0.21	0.21	0.19	0.203333
TraesCS5A02G399600	0.36	0.2	0.44	0.333333	0.81	0.32	0.46	0.53	0.2	0.55	0.04	0.263333	1.1	0.78	0.76	0.88	0.49	0.04	0.07	0.2
TraesCS5D02G526500	0.03	0.01	0	0.0133333	0.04	0.03	0.11	0.06	0.05	0.07	0.04	0.0533333	0.19	0.13	0.29	0.203333	0.53	0.03	0.04	0.2
TraesCS5D02G523000	0.6	0.41	0.56	0.523333	0.99	0.99	0.99	0.99	0.3	0.53	0.37	0.4	0.98	1.07	1.05	1.03333	0.38	0.03	0.18	0.196667
TraesCS7D02G136200	0.02	0.04	0.03	0.03	0.08	0.02	0.01	0.0366667	0.01	0.03	0.01	0.0166667	0.26	0.47	1.61	0.78	0.31	0.26	0.02	0.196667
TraesCS4A02G020600	2.02	2.72	2.5	2.41333	1.89	2.34	3.07	2.43333	0.99	1.05	0.58	0.873333	1.35	1.85	2.4	1.86667	0.38	0.14	0.06	0.193333
TraesCS6D02G379100	0.07	0.84	0.59	0.5	1.22	1.96	0.11	1.09667	0.13	0.1	0.98	0.403333	1.01	1.14	0.38	0.843333	0.57	0.01	0	0.193333
TraesCS5D02G479000	0.77	0.66	0.64	0.69	1.57	0.48	0.27	0.773333	0.83	0.66	0.26	0.583333	1.59	0.44	0.46	0.83	0.45	0.1	0.03	0.193333
TraesCS5D02G480500	0	0	0.01	0.00333333	0.12	0.13	0.31	0.186667	0.05	0.05	0.39	0.163333	0.23	0.24	0.23	0.233333	0.27	0.13	0.18	0.193333
TraesCS5D02G487800	0	0.17	0.04	0.07	0.24	0	0.23	0.156667	0.92	0.21	0	0.376667	0.25	0.24	0.11	0.2	0.04	0.54	0	0.193333
TraesCS5D02G524200	0.03	0.03	0.05	0.0366667	0.09	0.2	0.3	0.196667	0.02	0.03	0.06	0.0366667	0.58	0.56	1.01	0.716667	0.51	0.05	0.01	0.19
TraesCS1A02G031300	2.03	1.55	1.4	1.66	2.18	2.42	1.6	2.06667	1.13	1.53	0.39	1.01667	0.3	0.62	0.9	0.606667	0.4	0.06	0.11	0.19
TraesCS6D02G361600	0.02	0	0.01	0.01	0.12	0.21	0.17	0.166667	0.04	0.24	1.04	0.44	0.16	0.07	0.33	0.186667	0.18	0.05	0.34	0.19
TraesCS6B02G055000	0	0	0	0	0	0	0	0	0	0.17	0	0.0566667	1.56	0.35	0.89	0.933333	0.56	0	0	0.186667
TraesCS6D02G375800	0.27	0.26	0.29	0.273333	0.25	0.3	0.46	0.336667	0.33	0.42	0.46	0.403333	1.09	0.51	0.61	0.736667	0.44	0.02	0.1	0.186667
TraesCS5D02G492100	0.44	0.9	0.71	0.683333	0.23	0.58	0.49	0.433333	0.25	0.32	0.4	0.323333	0.37	0.73	0.73	0.61	0.36	0.07	0.13	0.186667
TraesCS1D02G000100	0.23	0.22	0.39	0.28	0.2	0.35	0.24	0.263333	0.11	0.09	0.1	0.1	0.28	0.28	0.52	0.36	0.37	0.05	0.14	0.186667
TraesCS1A02G017100	0	0	0	0	0	0	0	0	0	0	0	0	0.52	0	0	0.173333	0	0	0.56	0.186667
TraesCS5D02G509400	0.21	0.77	0.24	0.406667	0.33	0.15	0.13	0.203333	0.12	0.12	0.26	0.166667	0.15	0.07	0.18	0.133333	0.16	0.22	0.18	0.186667
TraesCS5D02G525400	0.35	0.53	0.92	0.6	0.51	1.8	0	0.77	0.3	0.3	0.26	0.286667	0	0	0.1	0.0333333	0.56	0	0	0.186667
TraesCS6D02G354300	0.05	0.06	0.07	0.06	0.28	0.12	0.01	0.136667	0.08	0.14	0.01	0.0766667	0.17	0.08	0.36	0.203333	0.32	0.02	0.21	0.183333
TraesCS5A02G398000	0.56	0.71	0.83	0.7	0.09	0.09	0	0.06	0.01	0.01	0	0.00666667	0.01	0.03	0.09	0.0433333	0.22	0.01	0.32	0.183333
TraesCS5A02G402800	0.29	0.12	0.22	0.21	1.13	1.46	0.22	0.936667	0.28	0.68	0.12	0.36	1.01	1.45	0.7	1.05333	0.5	0.03	0.01	0.18
TraesCS7A02G135500	0.11	0	0.07	0.06	0.31	0.81	0.23	0.45	0.3	0.8	1.46	0.853333	0.47	0.62	0.75	0.613333	0.25	0.05	0.24	0.18
TraesCS5D02G494600	0.02	0.03	0.05	0.0333333	0.22	0.43	0.84	0.496667	0.15	0.7	0.94	0.596667	0.35	0.63	0.63	0.536667	0.46	0.02	0.06	0.18
TraesCS5D02G472900	0	0	0	0	0.35	0.74	0.19	0.426667	0.17	0.15	0.19	0.17	0.25	0.36	0.41	0.34	0.09	0.04	0.41	0.18
TraesCS1A02G022600	0.24	0.66	0.21	0.37	0	0	0	0	0	0	0.79	0.263333	0.41	0	0	0.136667	0.54	0	0	0.18
TraesCS5D02G536300	0	0	0	0	0	0	0	0	0	0	0	0	0	0	0	0	0	0	0.54	0.18
TraesCS1D02G250100	1.9	1.91	2.15	1.98667	2.11	1.05	1.05	1.40333	1.02	1.32	0.03	0.79	2.15	2.16	0.63	1.64667	0.52	0.01	0	0.176667
TraesCS5D02G562800	0.58	0.25	0.3	0.376667	0.93	0.87	0.87	0.89	0.37	0.52	0.32	0.403333	1.03	0.81	0.63	0.823333	0.33	0.01	0.19	0.176667
TraesCS6D02G363700	0.09	0.01	0.02	0.04	0.79	0.12	0	0.303333	0.24	0.16	0.01	0.136667	0.93	0.34	0.22	0.496667	0.41	0.11	0.01	0.176667
TraesCS6D02G373500	0	0	0	0	0	0	0	0	0.12	0.04	0	0.0533333	0.2	0.21	0.49	0.3	0.36	0.04	0.13	0.176667
TraesCS6D02G365600	0.3	0.96	0.76	0.673333	0.12	1.03	0.94	0.696667	0.13	0.28	0.67	0.36	0.01	0.27	0.32	0.2	0.42	0.02	0.09	0.176667
TraesCS6D02G359600	0	0	0	0	0	0	0	0	0	0	0	0	0	0	0	0	0	0	0.53	0.176667
TraesCS7D02G134300	2.65	2.78	2.76	2.73	2.82	2.14	2.2	2.38667	0.41	2.1	3.56	2.02333	0.83	2.13	1.93	1.63	0.22	0.03	0.27	0.173333
TraesCS7A02G134800	0.3	0.41	0.4	0.37	0.86	0.39	0.37	0.54	0.24	0.32	0.05	0.203333	1.08	0.53	0.61	0.74	0.37	0.02	0.13	0.173333
TraesCS1D02G004600	1.22	2.6	2.14	1.98667	0.05	3.58	0.39	1.34	1.25	2.13	2.83	2.07	0.08	0.15	1.12	0.45	0.49	0.03	0	0.173333
TraesCS5D02G505500	1.1	2.82	2.67	2.19667	0.28	0.39	0	0.223333	0	0.39	1.89	0.76	0.32	0.1	0.56	0.326667	0.44	0.04	0.04	0.173333
TraesCS5D02G278500	0	0.14	0.07	0.07	0.07	0.03	0	0.0333333	0	0	0	0	0.15	0.14	0.58	0.29	0.34	0.16	0.02	0.173333
TraesCS5D02G551700	0.13	0.19	0.17	0.163333	0.02	0.02	0	0.0133333	0.02	0	0	0.00666667	0.02	0.08	0	0.0333333	0.02	0.26	0.24	0.173333
TraesCS5D02G511700	0	0	0	0	0	0	0	0	0	0	0	0	0	0	0.02	0.00666667	0.36	0.12	0.04	0.173333
TraesCS5D02G560400	0	0.11	0.03	0.0466667	2.63	0.99	0	1.20667	1.75	2.12	0.4	1.42333	1.66	1.84	0.86	1.45333	0.4	0.03	0.08	0.17
TraesCS3D02G542400	2.43	2.16	2.56	2.38333	1.54	0.27	0	0.603333	0.28	0.61	0.03	0.306667	0	0	0	0	0	0.2	0.31	0.17
TraesCS5D02G473500	0.03	0.09	0.06	0.06	0.2	0.19	0.2	0.196667	0.23	0.76	1.01	0.666667	0.44	0.2	0.44	0.36	0.29	0.01	0.2	0.166667
TraesCS5D02G539400	0	0.1	0.46	0.186667	0	0	0	0	0	0.14	0	0.0466667	0	0.26	0.63	0.296667	0.33	0	0.17	0.166667
TraesCS5D02G549800	1.19	2.49	2.48	2.05333	2.21	0.76	0.37	1.11333	1.06	1.33	0.97	1.12	0.98	1.19	0.83	1	0.26	0.06	0.17	0.163333
TraesCS6D02G376600	0.08	0.14	0.11	0.11	0.2	0.1	0.14	0.146667	0.11	0.06	0.09	0.0866667	0.14	0.1	0.19	0.143333	0.1	0.02	0.37	0.163333
TraesCS5A02G394800	0.68	2.33	2.46	1.82333	0.81	0.58	0.03	0.473333	0.19	0.22	0.87	0.426667	0.08	0.19	0.04	0.103333	0.3	0.04	0.15	0.163333
TraesCS6D02G355500	0	0	0	0	0	0	0	0	0	0	0	0	0.04	0	0.14	0.06	0.2	0.12	0.17	0.163333
TraesCS5D02G518100	0	0	0	0	0.02	0.01	0	0.01	0	0	0	0	0	0	0	0	0	0.12	0.37	0.163333
TraesCS6D02G353700	0.07	0.16	0.1	0.11	2.43	3.89	3.57	3.29667	3.42	1.83	1.97	2.40667	0.32	1.53	1.11	0.986667	0.35	0.13	0	0.16
TraesCS7A02G135100	0	0.01	0	0.00333333	0	0	0	0	0	0	0.02	0.00666667	0	0	0	0	0.04	0.42	0.02	0.16
TraesCS5D02G493000	1.07	1.61	1.39	1.35667	1.14	1.27	0.47	0.96	0.53	0.5	0.14	0.39	1.25	1	1.03	1.09333	0.28	0.04	0.15	0.156667
TraesCS5D02G526700	0.03	0	0	0.01	0.51	0.37	0.22	0.366667	0	0.16	0.16	0.106667	0.62	0.72	0.79	0.71	0.47	0	0	0.156667
TraesCS5D02G494500	0.04	0.27	0.24	0.183333	0.55	0.87	1.8	1.07333	0.58	0.85	1.27	0.9	0.47	0.81	0.73	0.67	0.46	0.01	0	0.156667
TraesCS5D02G562700	0.56	0.25	0.34	0.383333	1.17	0.61	0.54	0.773333	0.38	0.68	0.03	0.363333	0.95	0.89	0.37	0.736667	0.28	0	0.18	0.153333
TraesCS6D02G394300	0.28	0.24	0.27	0.263333	0.41	0.22	0.24	0.29	0.12	0.32	0.06	0.166667	0.73	0.64	0.68	0.683333	0.37	0.03	0.06	0.153333
TraesCS5D02G510500	0.06	0.04	0.05	0.05	0.13	0.02	0.01	0.0533333	0.02	0.02	0	0.0133333	0.24	0.45	0.3	0.33	0.44	0.01	0.01	0.153333
TraesCS3D02G540300	0.16	0.25	0.25	0.22	0.24	0.19	0.55	0.326667	0.13	0.21	0.17	0.17	0.29	0.25	0.44	0.326667	0.19	0.03	0.24	0.153333
TraesCS5D02G476200	0.06	0.23	0.26	0.183333	0	0.04	0	0.0133333	0	0.06	0.41	0.156667	0	0.02	0.49	0.17	0.16	0.08	0.22	0.153333
TraesCS3D02G541600	0.66	0.38	0.48	0.506667	0.26	0.11	0	0.123333	0.04	0.07	0	0.0366667	0	0	0	0	0	0.03	0.43	0.153333
TraesCS5D02G533400	1.69	2.17	2.21	2.02333	0.47	1.15	0.51	0.71	0.2	0.31	0.26	0.256667	0.29	0.71	0.51	0.503333	0.12	0.03	0.3	0.15
TraesCS4A02G019300	0.4	0.26	0.28	0.313333	0.74	0.19	0	0.31	0.22	0.19	0	0.136667	0.97	0.16	0.27	0.466667	0.41	0.03	0.01	0.15
TraesCS1D02G001900	0.39	0.28	0.11	0.26	0.38	0.25	0.38	0.336667	0.19	0.13	0.05	0.123333	0.49	0.39	0.51	0.463333	0.32	0.07	0.06	0.15
TraesCS1A02G018500	0.03	0.11	0.09	0.0766667	0.38	0.14	0.73	0.416667	0.93	0.82	2.05	1.26667	0.46	0.52	0.31	0.43	0.27	0.05	0.12	0.146667
TraesCS1D02G248700	0.21	0.15	0.23	0.196667	0.31	0.21	0.13	0.216667	0.19	0.11	0.08	0.126667	0.46	0.34	0.44	0.413333	0.33	0.01	0.1	0.146667
TraesCS6D02G348800	0.12	0.05	0	0.0566667	0.23	0.15	0.53	0.303333	0.59	0.88	0.62	0.696667	0.04	0.2	0.42	0.22	0.34	0.02	0.08	0.146667
TraesCS1A02G032600	0.28	0.21	0.18	0.223333	0.27	0.03	0	0.1	0.02	0.03	0	0.0166667	0.21	0.19	0.23	0.21	0.34	0.07	0.03	0.146667
TraesCS5D02G490200	0.25	0.69	0.45	0.463333	0.05	0.13	0	0.06	0	0	0.68	0.226667	0.11	0.18	0	0.0966667	0.41	0.03	0	0.146667
TraesCS6D02G347900	0	0	0	0	0	0	0	0	0	0	0	0	0	0	0	0	0.15	0.18	0.11	0.146667
TraesCS5D02G559200	0.01	0.06	0.05	0.04	0.47	0.14	0.04	0.216667	0.28	0.31	0.04	0.21	0.97	1.65	0.58	1.06667	0.4	0.01	0.02	0.143333
TraesCS6D02G358400	0.23	0.21	0.06	0.166667	0.43	0.4	0.37	0.4	0.6	0.48	0.51	0.53	0.79	0.33	0.44	0.52	0.27	0.03	0.13	0.143333
TraesCS5D02G534400	0.23	0.26	0.1	0.196667	0.66	0.36	0.17	0.396667	0.66	0.21	0.03	0.3	0.54	0.39	0.34	0.423333	0.25	0.05	0.13	0.143333
TraesCS6D02G368400	0	0	0	0	0	0	0	0	0	0	0	0	0	0	0.7	0.233333	0.43	0	0	0.143333
TraesCS5D02G505400	1	3.08	2.73	2.27	0.44	1.35	0.21	0.666667	0.03	0.16	0.73	0.306667	0.06	0.03	0.32	0.136667	0.1	0.11	0.22	0.143333
TraesCS5D02G540100	0	0	0	0	0	0	0	0	0	0	0	0	0	0.02	0.03	0.0166667	0.31	0.02	0.1	0.143333
TraesCS5D02G523100	0.11	0.2	0.29	0.2	0.19	0.18	0.27	0.213333	0.07	0.12	0.09	0.0933333	0.24	1.26	0.73	0.743333	0.36	0.02	0.04	0.14
TraesCS5D02G522500	0.24	0.2	0.1	0.18	0.63	0.3	0.16	0.363333	0.2	0.17	0	0.123333	0.73	0.53	0.38	0.546667	0.19	0	0.23	0.14
TraesCS5D02G501600	1.54	2.22	2.13	1.96333	0.28	0.18	0	0.153333	0.01	0.05	0	0.02	0.02	0.01	0.04	0.0233333	0.06	0.06	0.3	0.14
TraesCS3D02G533400	0.08	0	0	0.0266667	0	0	0	0	0	0	0.04	0.0133333	0	0	0	0	0	0.42	0	0.14
TraesCS5D02G484300	0	0	0	0	0	0	0	0	0	0	0	0	0	0	0	0	0.11	0.29	0.02	0.14
TraesCS5D02G548300	2.17	2.74	2.84	2.58333	3.03	2.53	1.7	2.42	0.57	1.1	1.38	1.01667	0.95	1.43	0.83	1.07	0.36	0.01	0.04	0.136667
TraesCS5D02G509000	1.41	1.4	2.11	1.64	0.19	0.26	0	0.15	0.21	0	0	0.07	0.4	0	1.53	0.643333	0.14	0.27	0	0.136667
TraesCS5D02G527900	0.32	0.92	0.75	0.663333	0.25	0.65	0.27	0.39	0.63	1.34	2.81	1.59333	0.05	0.27	0.44	0.253333	0.32	0.09	0	0.136667
TraesCS1A02G029700	0.09	0.37	0.39	0.283333	0.09	0.08	0.04	0.07	0.03	0.01	0.88	0.306667	0.22	0.07	0.04	0.11	0.31	0.01	0.09	0.136667
TraesCS6D02G369500	0	0	0	0	0	0.37	0	0.123333	0	0	0.02	0.00666667	0.02	0.04	0.54	0.2	0.4	0	0	0.133333
TraesCS7D02G147700	0	0	0	0	0	0	0	0	0	0	0	0	0.53	1.27	2.03	1.27667	0.36	0.01	0.02	0.13
TraesCS4A02G026700	0.14	0.28	0.09	0.17	1.13	0.65	0.68	0.82	0.15	0.82	0.17	0.38	1.39	1.03	0.36	0.926667	0.39	0	0	0.13
TraesCS5D02G530500	0.06	0.26	0.35	0.223333	0.14	0.13	0.22	0.163333	0.11	0.04	0.17	0.106667	0.2	0.52	0.54	0.42	0.17	0.07	0.15	0.13
TraesCS5D02G499400	0.25	0.66	0.7	0.536667	0.04	0.28	0.46	0.26	0	0.04	0.02	0.02	0.01	0.36	0.22	0.196667	0.39	0	0	0.13
TraesCS4A02G026500	0	0	0	0	0	0	0	0	0	0	0	0	0	0.05	0	0.0166667	0.03	0	0.36	0.13
TraesCS5D02G557300	0.14	0.5	0.46	0.366667	0.38	0.43	0.22	0.343333	0.16	0.22	0.19	0.19	0.58	0.24	0.44	0.42	0.23	0.01	0.14	0.126667
TraesCS6B02G057300	0	0	0	0	0	0	0.17	0.0566667	0.15	0	0	0.05	0	0	0.32	0.106667	0	0.07	0.31	0.126667
TraesCS5D02G490600	1.23	1.31	1.12	1.22	0.07	0.05	0	0.04	0	0	0	0	0.05	0.06	0	0.0366667	0.35	0.03	0	0.126667
TraesCS1A02G013900	0.59	1.3	1.11	1	0	0.12	0.2	0.106667	0	0	0	0	0	0	0	0	0.38	0	0	0.126667
TraesCS1A02G020900	0.11	1.07	1.61	0.93	1.65	1.78	1.95	1.79333	0.13	2.99	3.29	2.13667	0.78	0.6	2.01	1.13	0.15	0.22	0	0.123333
TraesCS1A02G031700	0.1	0.07	0.1	0.09	0.27	0.12	0.16	0.183333	0.17	0.14	0.02	0.11	0.43	0.37	0.45	0.416667	0.33	0.04	0	0.123333
TraesCS5D02G531000	0.05	0.03	0.05	0.0433333	0.4	0.26	0.99	0.55	1.81	1.23	0.8	1.28	0.19	0.43	0.32	0.313333	0.33	0	0.04	0.123333
TraesCS5D02G507700	4.63	5.3	5.31	5.08	0.08	0.38	0.06	0.173333	0.06	0.19	1.13	0.46	0.06	0.08	0.06	0.0666667	0.2	0.02	0.15	0.123333
TraesCS5D02G548200	0.5	0.5	0.5	0.5	0.26	0.03	0	0.0966667	0	0.01	0	0.00333333	0	0	0	0	0	0.04	0.33	0.123333
TraesCS7D02G135000	0	0	0	0	0	0	0	0	0	0	0	0	0	0	0	0	0.02	0.35	0	0.123333
TraesCS7D02G148700	0	0	0	0	0	0	0	0	0	0	0	0	0	0	0	0	0.37	0	0	0.123333
TraesCS1A02G031600	0.09	0.11	0.18	0.126667	0.45	0.24	0.1	0.263333	0.08	0.15	0.04	0.09	0.55	0.25	0.35	0.383333	0.31	0.03	0.02	0.12
TraesCS5D02G493600	0.21	0.18	0.21	0.2	0.51	0.19	0.09	0.263333	0.13	0.2	0.06	0.13	0.37	0.16	0.23	0.253333	0.19	0.01	0.16	0.12
TraesCS3D02G533900	0	0	0	0	0	0	0	0	0	0	0	0	0.24	0	0	0.08	0.29	0.07	0	0.12
TraesCS6B02G056000	0	0	0	0	0	0	0.05	0.0166667	0	0	0	0	0.01	0	0.09	0.0333333	0.09	0.21	0.06	0.12
TraesCS1A02G029400	0	0	0	0	0	0	0	0	0	0	0.01	0.00333333	0	0	0	0	0.35	0	0.01	0.12
TraesCS5D02G531500	0	0	0	0	0	0	0.03	0.01	0	0	0	0	0	0	4.73	1.57667	0.22	0	0.13	0.116667
TraesCS5D02G503900	0	0	0	0	0	0	0	0	0	0	0	0	0	3.07	0	1.02333	0.35	0	0	0.116667
TraesCS6D02G371700	0.25	0.29	0.35	0.296667	0.32	0.53	1.45	0.766667	0.33	0.33	0.45	0.37	0.37	0.88	0.58	0.61	0.1	0.08	0.17	0.116667
TraesCS1A02G025500	0.48	0.9	1.03	0.803333	0.41	0.68	0.01	0.366667	0.02	3.89	5.95	3.28667	0.65	0.77	0.26	0.56	0.35	0	0	0.116667
TraesCS5D02G490400	0.14	0.82	0.67	0.543333	0	0.23	0	0.0766667	0	0	0	0	0.18	0.94	0.36	0.493333	0.25	0.1	0	0.116667
TraesCS5D02G283400	0.5	0.36	0.28	0.38	0.25	0.12	0.02	0.13	0.1	0.08	0.02	0.0666667	0.4	0.24	0.21	0.283333	0.16	0.02	0.17	0.116667
TraesCS5D02G545600	0.04	0.02	0.07	0.0433333	0	0.02	0	0.00666667	0	0	0.06	0.02	0	0	0.07	0.0233333	0.08	0	0.27	0.116667
TraesCS4A02G024300	0	1.27	0.66	0.643333	0	0	0	0	0	0.25	0	0.0833333	0	0	0	0	0.35	0	0	0.116667
TraesCS7D02G148500	0	0	0	0	0	0	0	0	0	0	0	0	0	0	0	0	0.18	0.04	0.13	0.116667
TraesCS5D02G551600	0	0	0	0	0	0.25	0.45	0.233333	0	0.37	3.11	1.16	0	0	10.47	3.49	0.25	0.09	0	0.113333
TraesCS7D02G146700	0	0	0	0	0.01	0	0.02	0.01	0	0	0.14	0.0466667	0.01	0.23	6.81	2.35	0.29	0	0.05	0.113333
TraesCS5D02G563000	0.08	0.03	0.07	0.06	0.17	0.13	0.45	0.25	0.04	0.1	0.5	0.213333	0.29	0.27	2.53	1.03	0.22	0.02	0.1	0.113333
TraesCS6D02G381000	0.13	0.15	0.18	0.153333	2.57	2.17	0.44	1.72667	0.05	0.57	0.03	0.216667	0.31	0.24	0.08	0.21	0.33	0.01	0	0.113333
TraesCS7D02G148000	0.11	0.43	0.58	0.373333	0.87	0.23	0.77	0.623333	0.03	0.6	0.65	0.426667	0.22	0.2	0.13	0.183333	0	0.13	0.21	0.113333
TraesCS4A02G022800	0	0	0	0	0	0	0.01	0.00333333	0	0	0	0	0.09	0.08	0.34	0.17	0.33	0.01	0	0.113333
TraesCS1A02G033700	0.68	1.02	0.84	0.846667	0.05	0.11	0.09	0.0833333	0	0.08	0.12	0.0666667	0.08	0.09	0.03	0.0666667	0.27	0.07	0	0.113333
TraesCS1A02G022900	0	0	0	0	0	0	0	0	0	0	0	0	0	0	0.06	0.02	0.25	0.09	0	0.113333
TraesCS5D02G557500	2.32	1.94	2.1	2.12	0.68	0.42	0	0.366667	0	0.01	0	0.00333333	0	0.01	0.04	0.0166667	0	0.11	0.23	0.113333
TraesCS6B02G059200	1.56	2.72	2.75	2.34333	0.51	2.06	2.15	1.57333	0.25	0.4	1.07	0.573333	0.17	0.28	1.79	0.746667	0.23	0.07	0.03	0.11
TraesCS6D02G353600	0.1	0.13	0.12	0.116667	0.28	0.28	0.11	0.223333	0.08	0.18	0.11	0.123333	0.32	0.26	0.4	0.326667	0.21	0	0.12	0.11
TraesCS6D02G359100	0.01	0.02	0.03	0.02	0.13	0.21	0.1	0.146667	0.02	0.15	0.45	0.206667	0.12	0.12	0.36	0.2	0.3	0.02	0.01	0.11
TraesCS1A02G028100	0.8	1.8	2.44	1.68	0	0	0	0	0	0	0	0	0.55	0	0	0.183333	0	0	0.33	0.11
TraesCS5D02G472200	1.55	0.45	0.42	0.806667	0.13	0.45	0.19	0.256667	0.84	1.21	3.12	1.72333	0	0	0.06	0.02	0.26	0.07	0	0.11
TraesCS6D02G387900	0.67	1.02	1.18	0.956667	0.57	0.08	1.34	0.663333	0.8	0.58	1.55	0.976667	0.03	0.25	2.89	1.05667	0.23	0.09	0	0.106667
TraesCS5D02G483600	0.57	1.26	1.15	0.993333	0.64	0.69	0.49	0.606667	0.23	0.33	0.13	0.23	0.94	1.11	0.99	1.01333	0.3	0.02	0	0.106667
TraesCS5D02G504300	4.47	4.56	4.44	4.49	3.16	3.35	0.24	2.25	1.38	1.89	0.46	1.24333	1.65	0.66	0.3	0.87	0.04	0.03	0.25	0.106667
TraesCS5D02G471100	1.3	1.67	1.64	1.53667	0.3	2.16	2.84	1.76667	0	0.17	0.43	0.2	0.09	0.07	1.3	0.486667	0.31	0.01	0	0.106667
TraesCS6D02G357300	0.09	0.03	0.06	0.06	0.06	0.06	0.17	0.0966667	0.02	0.07	0.09	0.06	0.11	0.19	0.37	0.223333	0.29	0.01	0.02	0.106667
TraesCS6D02G385300	0	0.05	0.06	0.0366667	0.05	0.15	0.06	0.0866667	0.04	0.09	0.02	0.05	0.11	0.27	0.18	0.186667	0.3	0	0.02	0.106667
TraesCS5D02G514100	0	0.03	0.03	0.02	0	0.08	0.12	0.0666667	0.03	0.08	0.07	0.06	0.17	0.06	0.19	0.14	0.18	0	0.14	0.106667
TraesCS1A02G018100	0	0	0	0	0	0.09	0	0.03	0	0	0.09	0.03	0.07	0.02	0.01	0.0333333	0.32	0	0	0.106667
TraesCS5A02G394600	0.11	0.33	0.23	0.223333	0.04	0.03	0	0.0233333	0	0.06	0	0.02	0	0	0	0	0.03	0.03	0.26	0.106667
TraesCS5D02G498500	0.17	0.94	0.67	0.593333	0.08	0.9	0.37	0.45	0.15	0.46	0.04	0.216667	0.1	0.07	1.63	0.6	0.09	0.12	0.1	0.103333
TraesCS6D02G347300	0.08	0.1	0.06	0.08	0.14	0.15	0.18	0.156667	0.02	0.05	0	0.0233333	0.46	0.38	0.57	0.47	0.22	0.03	0.06	0.103333
TraesCS7A02G132200	0.16	0.22	0.25	0.21	0.3	0.42	0.25	0.323333	0.11	0.53	1.05	0.563333	0.45	0.46	0.4	0.436667	0.25	0.02	0.04	0.103333
TraesCS5D02G519100	0.71	2.29	2.39	1.79667	0.92	1.53	0.19	0.88	0.16	1.6	0.9	0.886667	0.32	0.32	0.16	0.266667	0.3	0.01	0	0.103333
TraesCS6D02G375900	0.05	0.04	0.04	0.0433333	0.12	0.28	0.28	0.226667	0.21	1.19	1.14	0.846667	0.24	0.19	0.27	0.233333	0.24	0.02	0.05	0.103333
TraesCS5D02G279700	0.05	0	0.03	0.0266667	0.06	0.03	0.45	0.18	0	0	0.03	0.01	0.27	0.03	0.32	0.206667	0.14	0.03	0.14	0.103333
TraesCS7D02G137100	0.12	0.23	0.27	0.206667	0.02	0.29	0.7	0.336667	0.07	0.02	0.15	0.08	0.02	0.15	0.22	0.13	0.15	0.14	0.02	0.103333
TraesCS5D02G501500	2.83	4.79	4.96	4.19333	0.2	0.21	0.1	0.17	0.2	0.12	0.38	0.233333	0.09	0.14	0.12	0.116667	0.1	0.08	0.13	0.103333
TraesCS5D02G486200	0	0	0	0	0	0	0	0	0	0	0	0	0	0	0.1	0.0333333	0.24	0	0.07	0.103333
TraesCS6B02G054500	0	0	0	0	0	0	0	0	0	0	0	0	0	0	0.03	0.01	0.14	0.09	0.08	0.103333
TraesCS6D02G382600	2.45	2.24	1.98	2.22333	0.2	0.04	0	0.08	0	0	0.06	0.02	0.02	0	0	0.00666667	0	0.04	0.27	0.103333
TraesCS1A02G032500	0	0	0	0	0	0	0	0	0	0	0.23	0.0766667	0	0	0	0	0	0	0.31	0.103333
TraesCS5D02G532600	0	0	0.04	0.0133333	0.25	0.09	0.18	0.173333	0	0.15	0.42	0.19	1.15	0.97	1.17	1.09667	0.3	0	0	0.1
TraesCS3D02G531500	0.82	2.22	2.03	1.69	0.71	1.11	1.01	0.943333	0.68	1.06	0.89	0.876667	0.6	0.4	0.92	0.64	0.14	0.05	0.11	0.1
TraesCS5A02G398600	0	0	0	0	0	0	0	0	0	0	0	0	0.72	0.2	0.87	0.596667	0.3	0	0	0.1
TraesCS5D02G527500	0	0.07	0	0.0233333	0.51	0.52	0.3	0.443333	0.1	0.96	3.15	1.40333	0.61	0.35	0.38	0.446667	0.26	0.03	0.01	0.1
TraesCS5D02G553200	2.69	3.17	3.08	2.98	1.52	0.49	0.2	0.736667	0.79	0.41	0.16	0.453333	0.35	0.52	0.14	0.336667	0.19	0.09	0.02	0.1
TraesCS6B02G051700	0.23	0.44	0.66	0.443333	0.15	0.16	0.07	0.126667	0.31	0.22	0.11	0.213333	0.19	0.24	0.29	0.24	0.16	0.02	0.12	0.1
TraesCS7A02G135600	0	0	0	0	0	0	0	0	0	0.03	0.03	0.02	0	0	0	0	0.3	0	0	0.1
TraesCS5D02G493100	0.21	0.09	0.34	0.213333	0.09	0.09	0	0.06	0	0	0	0	0.46	0.5	0.36	0.44	0.08	0.04	0.17	0.0966667
TraesCS7D02G136400	1.22	1.18	1.19	1.19667	1.28	2.16	0.38	1.27333	1.12	1.22	0.35	0.896667	0.17	0.11	0.52	0.266667	0.27	0.02	0	0.0966667
TraesCS5D02G494300	0.2	0.86	0.92	0.66	0.64	0.93	0.9	0.823333	0.29	1.28	1.23	0.933333	0.09	0.23	0.43	0.25	0.14	0.01	0.14	0.0966667
TraesCS5D02G524300	0.01	0.05	0	0.02	0.03	0	0.06	0.03	0	0.02	0.02	0.0133333	0.04	0.08	0.42	0.18	0.16	0.01	0.12	0.0966667
TraesCS5A02G405800	2.52	3.07	2.88	2.82333	1.09	0.6	0.35	0.68	0	0.03	0	0.01	0	0.17	0.2	0.123333	0.19	0.01	0.09	0.0966667
TraesCS6D02G361500	0	0.11	0.12	0.0766667	0	0.05	0	0.0166667	0.07	0	0.03	0.0333333	0.01	0	0.02	0.01	0.29	0	0	0.0966667
TraesCS5D02G511400	0	0	0	0	0	0	0	0	0	0	0	0	0	0.02	0	0.00666667	0	0.21	0.08	0.0966667
TraesCS3D02G537500	0.03	0	0	0.01	0.02	0	0	0.00666667	0.17	0	0	0.0566667	0	0	0	0	0	0.29	0	0.0966667
TraesCS6D02G366200	0.19	0	0.02	0.07	0	0.01	0	0.00333333	0.02	0	0	0.00666667	0	0	0	0	0.21	0.04	0.04	0.0966667
TraesCS5D02G544100	0.1	0.12	0.16	0.126667	0.01	0	0	0.00333333	0.01	0	0	0.00333333	0	0	0	0	0.25	0	0.04	0.0966667
TraesCS3D02G545300	0.98	0.71	0.59	0.76	0.84	0.52	4.63	1.99667	3.41	0.87	0	1.42667	0.02	0.87	1.05	0.646667	0.19	0.09	0	0.0933333
TraesCS1D02G004500	0.46	1.68	1.19	1.11	0.08	1.47	0.4	0.65	0.14	0.42	1.37	0.643333	0.03	0.04	0.49	0.186667	0.28	0	0	0.0933333
TraesCS5D02G531900	0.14	0.34	0.42	0.3	0.02	0	0.04	0.02	0.07	0.05	0.05	0.0566667	0.03	0.13	0.4	0.186667	0.27	0.01	0	0.0933333
TraesCS1D02G251900	0.34	0.6	0.77	0.57	0.06	0.14	0.32	0.173333	0.27	0.2	0.25	0.24	0.1	0.15	0.26	0.17	0.13	0.02	0.13	0.0933333
TraesCS5D02G501800	0.46	1.53	1.43	1.14	0.1	0.25	0.09	0.146667	0.33	0.33	0.94	0.533333	0.03	0.03	0.13	0.0633333	0.23	0.01	0.04	0.0933333
TraesCS5D02G537000	1.18	1.27	1.5	1.31667	0	0.11	0.11	0.0733333	0	0.1	0.14	0.08	0.04	0.04	0.07	0.05	0.07	0.02	0.19	0.0933333
TraesCS6D02G355600	0	0	0	0	0	0	0	0	0	0	0	0	0	0	0	0	0.08	0.2	0	0.0933333
TraesCS7A02G135000	0	0	0	0	0	0	0	0	0	0	0	0	0	0	0	0	0	0.28	0	0.0933333
TraesCS6D02G395500	0.01	0.06	0	0.0233333	0.45	0.18	0	0.21	0	0.07	0	0.0233333	2.96	1.09	0.19	1.41333	0.25	0	0.02	0.09
TraesCS1A02G024400	0.06	0.07	0.06	0.0633333	1.91	2.1	1.99	2	0.75	0.83	0.67	0.75	0.69	1.95	0.8	1.14667	0.24	0.03	0	0.09
TraesCS5D02G556500	0.71	0.69	0.65	0.683333	0.85	0.57	0.27	0.563333	0.2	0.35	0.1	0.216667	0.26	0.53	0.13	0.306667	0.26	0.01	0	0.09
TraesCS5D02G545400	0.1	0.16	0.2	0.153333	0.32	0.1	0.04	0.153333	0.04	0.17	0.01	0.0733333	0.51	0.16	0.24	0.303333	0.19	0.01	0.07	0.09
TraesCS5D02G553900	4.52	4.15	4.33	4.33333	1.16	2.78	0.07	1.33667	1.16	0.87	0.92	0.983333	0.09	0.24	0.13	0.153333	0.2	0.01	0.06	0.09
TraesCS1A02G016300	0.09	0.02	0.07	0.06	0.05	0.05	0.03	0.0433333	0	0.04	0.3	0.113333	0.07	0.01	0.33	0.136667	0.27	0	0	0.09
TraesCS6D02G394100	0.58	0.65	0.81	0.68	0.07	0.16	0.15	0.126667	0	0	0.04	0.0133333	0.01	0.04	0.28	0.11	0.27	0	0	0.09
TraesCS6D02G353800	0.02	0	0.03	0.0166667	0.01	0.11	0.02	0.0466667	0	0.03	0	0.01	0.09	0.02	0.21	0.106667	0.23	0	0.04	0.09
TraesCS6B02G056900	0.05	0.18	0.19	0.14	0	0.26	0.01	0.09	0.21	4.07	3.97	2.75	0.01	0	0.3	0.103333	0.23	0.04	0	0.09
TraesCS4A02G017900	0.04	0.15	0.11	0.1	0.09	0.17	0.24	0.166667	0.08	0.06	0.17	0.103333	0.09	0.08	0.06	0.0766667	0.1	0	0.17	0.09
TraesCS3D02G532400	5.83	3.92	3.93	4.56	0.02	0	0	0.00666667	0.02	0	0.15	0.0566667	0.02	0.06	0	0.0266667	0.26	0.01	0	0.09
TraesCS3D02G527500	0	0.04	0.05	0.03	1.08	1.33	0.15	0.853333	0.05	0.06	0.04	0.05	0.44	0.94	0.23	0.536667	0.25	0	0.01	0.0866667
TraesCS5D02G482300	0.09	0.73	0.7	0.506667	0.39	1.26	2.02	1.22333	0	0	0	0	0	0	1.45	0.483333	0.18	0.08	0	0.0866667
TraesCS5D02G281000	0.06	0	0.02	0.0266667	0.06	0.06	0.06	0.06	0.11	0.05	0	0.0533333	0.42	0.1	0.3	0.273333	0.23	0	0.03	0.0866667
TraesCS5D02G521600	0.5	1.25	0.8	0.85	0.13	0.28	0.59	0.333333	0.08	0.1	0.47	0.216667	0.07	0.23	0.32	0.206667	0.01	0.03	0.22	0.0866667
TraesCS5D02G543400	0	0	0	0	0.42	0	0	0.14	0.12	0	0	0.04	0.34	0	0	0.113333	0	0	0.26	0.0866667
TraesCS5D02G502300	0.03	0	0	0.01	0	0.27	1.58	0.616667	0.62	1.57	1.74	1.31	0	0	0.32	0.106667	0.25	0.01	0	0.0866667
TraesCS6D02G367200	5.09	4.36	4.41	4.62	3.66	5.16	6	4.94	3.38	5.57	6.14	5.03	2.42	3.79	4.98	3.73	0.07	0.18	0	0.0833333
TraesCS3D02G533100	0	0	0.01	0.00333333	3.12	2.99	0.11	2.07333	0.01	0.21	0	0.0733333	3.06	3.17	0.69	2.30667	0.24	0	0.01	0.0833333
TraesCS1A02G034100	1.72	1.27	1.26	1.41667	2.23	0.95	0	1.06	1.17	0.54	0.03	0.58	1.38	0.7	0.2	0.76	0.16	0.09	0	0.0833333
TraesCS5D02G496200	0.05	0.17	0.14	0.12	0.11	0	0	0.0366667	0.11	0.02	0	0.0433333	1.07	0.69	0.21	0.656667	0.09	0.03	0.13	0.0833333
TraesCS4A02G023300	0.35	0.5	0.63	0.493333	0.95	1.06	2.5	1.50333	0.51	0.72	0.03	0.42	0.04	0.79	0.22	0.35	0.07	0	0.18	0.0833333
TraesCS5D02G482400	0.02	0.28	0.28	0.193333	0.61	0.83	1.67	1.03667	0.16	0.15	0.04	0.116667	0	0.09	0.89	0.326667	0.18	0.07	0	0.0833333
TraesCS5D02G483100	1.03	2.6	2.53	2.05333	0.06	0.17	0.23	0.153333	0.14	0.06	0.26	0.153333	0.17	0.24	0.51	0.306667	0.12	0.04	0.09	0.0833333
TraesCS5D02G499300	0.39	0	0.16	0.183333	0.1	0.14	0.54	0.26	0	0	0	0	0	0.45	0.43	0.293333	0.25	0	0	0.0833333
TraesCS6B02G052400	0.2	0.81	1	0.67	0.06	0.06	0.02	0.0466667	0.47	0.1	0.02	0.196667	0.09	0.09	0.16	0.113333	0.21	0.01	0.03	0.0833333
TraesCS1D02G249500	0.04	0.51	0.2	0.25	0.02	0.05	0.95	0.34	0.12	0.2	0.04	0.12	0.15	0.09	0.02	0.0866667	0	0.19	0.06	0.0833333
TraesCS1D02G003000	0.22	0.42	0.09	0.243333	0.15	0.13	0.13	0.136667	0.08	0.05	0.15	0.0933333	0.07	0.04	0.06	0.0566667	0.07	0.03	0.15	0.0833333
TraesCS5D02G473700	0.12	0.27	0.2	0.196667	0	0	0	0	0	0.04	0.11	0.05	0	0	0	0	0	0.02	0.23	0.0833333
TraesCS5D02G556000	0	0	0	0	0	0	0	0	0	0	0	0	0	0	0	0	0.06	0.19	0	0.0833333
TraesCS6D02G355400	0	0	0	0	0	0	0	0	0	0	0	0	0	0	0	0	0.25	0	0	0.0833333
TraesCS7D02G143800	0	0	0	0	0	0	0	0	0	0	0	0	0	0	0	0	0.25	0	0	0.0833333
TraesCS6D02G357500	1.89	2.07	2.2	2.05333	0.5	0.41	0.64	0.516667	0.48	0.27	0.11	0.286667	0.63	0.87	0.68	0.726667	0.13	0.05	0.06	0.08
TraesCS5D02G523400	0.07	0.02	0.12	0.07	0.48	0.41	0.4	0.43	0.23	0.15	0.02	0.133333	0.21	1.09	0.1	0.466667	0.11	0.01	0.12	0.08
TraesCS5D02G529000	0	0	0	0	0	0	0.01	0.00333333	0	0.01	0	0.00333333	0.01	0.07	1.31	0.463333	0.21	0	0.03	0.08
TraesCS5D02G484600	0	0	0	0	0.34	0.35	0.91	0.533333	0.99	0.56	1.45	1	0.29	0.43	0	0.24	0.24	0	0	0.08
TraesCS5D02G521100	0.28	0.93	1.01	0.74	0.06	0.12	0.32	0.166667	0.1	0.09	0.44	0.21	0.13	0.26	0.33	0.24	0.22	0	0.02	0.08
TraesCS6D02G365800	0.07	0.15	0.07	0.0966667	0.09	0	0	0.03	0.07	0.03	0	0.0333333	0.44	0	0	0.146667	0.22	0.02	0	0.08
TraesCS6D02G369000	0.76	0.35	0.52	0.543333	0	0	0	0	0	0	0.05	0.0166667	0.1	0.1	0.02	0.0733333	0.21	0.03	0	0.08
TraesCS5D02G524500	2.58	0.51	0.41	1.16667	0.03	1.48	0.02	0.51	0.02	0.03	0	0.0166667	0.04	0.08	0	0.04	0.24	0	0	0.08
TraesCS3D02G538300	0.46	1.18	1.45	1.03	0.04	0.13	0.04	0.07	0	0	0	0	0	0	0	0	0	0.16	0.08	0.08
TraesCS1A02G024800	0	0	0	0	0	0	0	0	0	0	0	0	0	0	0	0	0.24	0	0	0.08
TraesCS1A02G025300	0	0	0	0	0	0	0	0	0	0	0	0	0	0	0	0	0.24	0	0	0.08
TraesCS6D02G364700	0	0	0	0	0	0	0	0	0	0	0	0	0	0	0	0	0.14	0.1	0	0.08
TraesCS5D02G487300	0.02	0	0	0.00666667	0	0	0.03	0.01	0.08	0	0	0.0266667	0	0	5.25	1.75	0.23	0	0	0.0766667
TraesCS5D02G534200	1.45	1.18	1.45	1.36	0.72	1.08	1.11	0.97	0.21	0.46	0.76	0.476667	0.12	0.48	0.98	0.526667	0.19	0	0.04	0.0766667
TraesCS5D02G510800	0	0	0	0	0	0	0	0	0	0	0	0	0	0.04	0.89	0.31	0.09	0.01	0.13	0.0766667
TraesCS5D02G284700	0.01	0.09	0.05	0.05	0.13	0.14	0.04	0.103333	0	0.05	0.05	0.0333333	0.2	0.2	0.37	0.256667	0.23	0	0	0.0766667
TraesCS6D02G376200	0.04	0	0	0.0133333	0.11	0.15	0.14	0.133333	0.04	0.23	0.37	0.213333	0.18	0.23	0.24	0.216667	0.04	0.02	0.17	0.0766667
TraesCS7A02G132800	0.61	2.87	2.91	2.13	0	0	0	0	0.02	0.22	0.13	0.123333	0.29	0.14	0	0.143333	0.02	0	0.21	0.0766667
TraesCS1A02G031400	0.12	0	0	0.04	0.09	0.17	0	0.0866667	0.27	0.21	0.31	0.263333	0.4	0	0	0.133333	0.2	0.03	0	0.0766667
TraesCS5D02G509900	0	0.09	0.05	0.0466667	0	0.02	0	0.00666667	0	0	0.01	0.00333333	0.03	0.04	0.18	0.0833333	0.17	0.01	0.05	0.0766667
TraesCS3D02G537800	2.58	1.74	2.03	2.11667	0.03	0.13	0	0.0533333	0	0.01	0.32	0.11	0.01	0.04	0.03	0.0266667	0.22	0	0.01	0.0766667
TraesCS5D02G533100	2.18	2.61	2.75	2.51333	0.67	0.87	0.1	0.546667	0.12	0.35	0.24	0.236667	0.37	0.2	0.41	0.326667	0.18	0.01	0.03	0.0733333
TraesCS5D02G524800	0.07	0.06	0.04	0.0566667	0.2	0.34	0.38	0.306667	0.29	0.32	1.24	0.616667	0.3	0.19	0.39	0.293333	0.14	0.02	0.06	0.0733333
TraesCS3D02G542200	0	0	0	0	0.12	0	0	0.04	0	0.02	0	0.00666667	0.18	0	0.33	0.17	0.22	0	0	0.0733333
TraesCS6D02G382200	0.87	0.46	0.41	0.58	0.36	0.11	0.8	0.423333	0.02	0.02	0	0.0133333	0.05	0.05	0.22	0.106667	0.19	0.01	0.02	0.0733333
TraesCS5D02G541700	0	0	0	0	0	0.05	0.05	0.0333333	0	0	0	0	0.03	0.11	0.15	0.0966667	0.2	0	0.02	0.0733333
TraesCS5D02G278200	0.49	2.02	2.11	1.54	0.09	0.32	0.03	0.146667	0.05	0.23	2.51	0.93	0	0.03	0.21	0.08	0.22	0	0	0.0733333
TraesCS1A02G032900	0.22	0.08	0.07	0.123333	0.85	0.92	0.01	0.593333	1.13	0.13	0	0.42	0.06	0.05	0.01	0.04	0.21	0.01	0	0.0733333
TraesCS7A02G136900	0.04	0	0.01	0.0166667	0	0	0	0	0.02	0	0	0.00666667	0	0	0	0	0.02	0.01	0.19	0.0733333
TraesCS6D02G361900	0.13	0.05	0.08	0.0866667	1.43	0.21	0	0.546667	0.51	0.59	0.02	0.373333	1.89	0.91	0.29	1.03	0.01	0.02	0.18	0.07
TraesCS5D02G546900	0.36	0.27	0.43	0.353333	0.19	0.23	0.07	0.163333	0.08	0.07	0.02	0.0566667	0.39	1.15	0.47	0.67	0.21	0	0	0.07
TraesCS1A02G016203	0.04	0.04	0.08	0.0533333	0.13	0.12	0.14	0.13	0.08	0.39	0.35	0.273333	0.13	0.16	0.12	0.136667	0.09	0.04	0.08	0.07
TraesCS5D02G533200	2.14	2.15	2.13	2.14	0.11	0.27	0.26	0.213333	0.19	0.08	0.05	0.106667	0.06	0.02	0.32	0.133333	0.2	0.01	0	0.07
TraesCS5D02G494900	0	2.53	2.42	1.65	0	0.03	0.01	0.0133333	0	0.03	0.02	0.0166667	0	0	0	0	0	0	0.21	0.07
TraesCS5D02G479800	0.16	0.26	0.12	0.18	0.02	0	0	0.00666667	0	0	0	0	0	0	0	0	0	0.06	0.15	0.07
TraesCS4A02G020500	0.28	0.12	0.04	0.146667	0	0.27	1.11	0.46	0.02	0.02	0.6	0.213333	0.21	6.32	0.58	2.37	0.05	0	0.15	0.0666667
TraesCS6D02G386300	1.97	3.4	3.17	2.84667	2.29	1.83	0.06	1.39333	3.18	4.21	0.11	2.5	0.4	1.92	1.04	1.12	0.01	0.01	0.18	0.0666667
TraesCS5D02G479100	1.56	1.76	1.58	1.63333	1.88	2.04	0.35	1.42333	0.66	0.92	0.48	0.686667	1.89	1.2	0.22	1.10333	0.09	0.02	0.09	0.0666667
TraesCS5D02G512200	0	0	0.21	0.07	0	0	0	0	0	0	0	0	0.27	1.22	0.85	0.78	0.15	0.05	0	0.0666667
TraesCS5D02G556300	0	0	0	0	0	0.02	0.11	0.0433333	0	0.02	0.04	0.02	0.66	0.53	0.44	0.543333	0.19	0.01	0	0.0666667
TraesCS7A02G130800	0	0	0	0	0	0.03	0.07	0.0333333	0.03	0.16	0.08	0.09	0.19	1.2	0.05	0.48	0.06	0	0.14	0.0666667
TraesCS5D02G530600	0.67	1.06	1.22	0.983333	0.23	0.31	0.66	0.4	0.19	0.91	1.26	0.786667	0.09	0.19	1.05	0.443333	0.08	0.04	0.08	0.0666667
TraesCS1A02G023205	0.03	0.14	0.09	0.0866667	0.16	0.07	0.03	0.0866667	0.07	0.1	0	0.0566667	0.24	0.12	0.1	0.153333	0.04	0.01	0.15	0.0666667
TraesCS5D02G483900	0.57	0.86	0.67	0.7	0	0.05	0	0.0166667	0.08	0.09	1.15	0.44	0	0.1	0.3	0.133333	0.15	0	0.05	0.0666667
TraesCS5A02G394200	0	0	0.01	0.00333333	0	0.03	0	0.01	0.02	0	0	0.00666667	0	0.03	0.3	0.11	0.2	0	0	0.0666667
TraesCS1D02G002700	0.94	1.28	1.29	1.17	0.11	0.23	0.1	0.146667	0.05	0.66	0.31	0.34	0.07	0.14	0.1	0.103333	0.09	0.04	0.07	0.0666667
TraesCS5D02G549200	0.73	2.17	1.66	1.52	0.06	0.04	0	0.0333333	0.19	0.37	0.18	0.246667	0	0.07	0.03	0.0333333	0.07	0.02	0.11	0.0666667
TraesCS1A02G028000	0	0	0	0	0	0	0	0	0	0	0	0	0	0.03	0	0.01	0.2	0	0	0.0666667
TraesCS5D02G536600	0	0	0	0	0	0	0.03	0.01	0	0	0	0	0	0	5.38	1.79333	0.19	0	0	0.0633333
TraesCS5D02G508000	0	0	0	0	0	0	0	0	0	0	0	0	0	0	4.2	1.4	0.19	0	0	0.0633333
TraesCS1D02G251200	0.47	0.85	0.95	0.756667	0.34	0.28	0.1	0.24	0.42	0.27	0.59	0.426667	0.55	0.48	0.2	0.41	0.16	0.02	0.01	0.0633333
TraesCS6D02G377500	0.48	0.24	0.25	0.323333	0.52	0.4	0.45	0.456667	0.16	0.37	0.09	0.206667	0.5	0.29	0.18	0.323333	0.16	0.01	0.02	0.0633333
TraesCS5D02G547100	0.27	0.43	0.44	0.38	0.12	0.17	0.08	0.123333	0.09	0.42	0.34	0.283333	0.19	0.29	0.27	0.25	0.14	0.01	0.04	0.0633333
TraesCS5D02G476100	0.02	0.04	0	0.02	0.05	0.04	0.41	0.166667	0.04	0.16	0.15	0.116667	0.11	0.07	0.19	0.123333	0.11	0.01	0.07	0.0633333
TraesCS5D02G545000	1.91	1.59	1.72	1.74	0.5	0.32	0	0.273333	0.01	0.28	0	0.0966667	0.1	0.07	0	0.0566667	0	0.03	0.16	0.0633333
TraesCS5D02G283000	0	0	0.03	0.01	0.06	0.03	0	0.03	0	0	0.2	0.0666667	0	0.03	0.07	0.0333333	0.14	0	0.05	0.0633333
TraesCS3D02G536100	0.06	0	0	0.02	0.06	0	0	0.02	0	0	0.1	0.0333333	0.06	0.03	0	0.03	0.06	0	0.13	0.0633333
TraesCS5D02G492700	0	0	0	0	0.1	0.03	0	0.0433333	0	0.03	0	0.01	0.03	0	0.03	0.02	0.19	0	0	0.0633333
TraesCS3D02G536400	0	0	0.25	0.0833333	0.06	0	0	0.02	0	0	0	0	0	0	0	0	0.06	0	0.13	0.0633333
TraesCS6D02G353200	0	0	0	0	0	0	0	0	0	0	0	0	0	0	0	0	0.1	0.09	0	0.0633333
TraesCS5D02G519300	0	0	0	0	0	0	0	0	0	0	0.05	0.0166667	0	0.05	4.63	1.56	0.18	0	0	0.06
TraesCS1D02G249300	0.36	0.93	0.99	0.76	0.04	0.14	0.98	0.386667	0.36	0.8	1.23	0.796667	0.16	0.55	0.65	0.453333	0.18	0	0	0.06
TraesCS7D02G145000	0.16	0	0.21	0.123333	0.37	1.46	1.45	1.09333	2.73	3.53	1.31	2.52333	0.16	0	0.5	0.22	0.18	0	0	0.06
TraesCS7A02G131000	2.97	3.26	2.97	3.06667	1.28	0.55	0.62	0.816667	1.42	1	0	0.806667	0	0.46	0.09	0.183333	0	0.18	0	0.06
TraesCS6B02G059300	1.6	2.01	2.13	1.91333	0.08	0.19	0.1	0.123333	0.02	0.04	0.03	0.03	0.02	0.03	0.37	0.14	0.18	0	0	0.06
TraesCS6B02G051900	0.79	2.85	2.89	2.17667	0.19	0.36	0.36	0.303333	0.71	0.06	0.57	0.446667	0.03	0.01	0.05	0.03	0.05	0.06	0.07	0.06
TraesCS6D02G377000	0.19	0.17	0.24	0.2	0	0	0.07	0.0233333	0	0.02	0	0.00666667	0	0.04	0	0.0133333	0	0.12	0.06	0.06
TraesCS7D02G136700	0.67	1.24	1.42	1.11	0	0.04	0	0.0133333	0.01	0	0.05	0.02	0	0	0	0	0.16	0.01	0.01	0.06
TraesCS6D02G367400	5.28	5.04	5.12	5.14667	2.45	7.61	7.79	5.95	3.81	6.02	6.92	5.58333	1.24	1.57	5	2.60333	0.17	0	0	0.0566667
TraesCS5D02G552400	0.06	0.24	0.26	0.186667	0.02	0	0.15	0.0566667	0.05	0.05	0.27	0.123333	0.12	1.23	0.49	0.613333	0.16	0.01	0	0.0566667
TraesCS4A02G021000	0	0	0.03	0.01	0	0	0.01	0.00333333	0.05	0.01	0.03	0.03	0.15	0.09	1.15	0.463333	0.12	0.02	0.03	0.0566667
TraesCS6D02G368300	0.31	0.23	0.3	0.28	0.07	0.04	0	0.0366667	0.06	0.08	0.02	0.0533333	0.06	0.11	0.09	0.0866667	0.08	0.02	0.07	0.0566667
TraesCS7D02G139600	0.82	1.51	1.45	1.26	0.03	0	0.03	0.02	0.03	0.01	0.05	0.03	0	0.05	0.18	0.0766667	0.13	0.04	0	0.0566667
TraesCS6D02G389900	0.07	0.32	0.26	0.216667	0.02	0	0.06	0.0266667	0.02	0.02	0.25	0.0966667	0	0.04	0.14	0.06	0.1	0	0.07	0.0566667
TraesCS6D02G367800	4.85	4.62	4.72	4.73	0.48	0.39	0	0.29	0.07	0	0	0.0233333	0	0.02	0.09	0.0366667	0.08	0.04	0.05	0.0566667
TraesCS7D02G135700	0	0	0.01	0.00333333	0	0	0	0	0	0.01	0	0.00333333	0	0	0.01	0.00333333	0.17	0	0	0.0566667
TraesCS6D02G377600	0	0	0	0	0.32	0	0.17	0.163333	0	0	0.15	0.05	0	0	0	0	0.17	0	0	0.0566667
TraesCS7A02G133900	0	0	0	0	0	0	0.05	0.0166667	0	0	0	0	0	0	0	0	0	0.02	0.15	0.0566667
TraesCS7A02G134700	2.4	2.22	2.42	2.34667	2.25	1.16	1.44	1.61667	0.31	1.86	2.85	1.67333	0.7	1.68	0.82	1.06667	0.07	0.04	0.05	0.0533333
TraesCS5A02G405400	0	0	0	0	1.82	0.57	0	0.796667	0.12	0.43	0	0.183333	1.79	0.41	0.05	0.75	0.01	0.04	0.11	0.0533333
TraesCS5D02G555400	0.7	0.94	0.89	0.843333	0.62	0.56	0.32	0.5	0.12	0.23	0.01	0.12	1.05	0.38	0.15	0.526667	0.08	0	0.08	0.0533333
TraesCS6D02G373100	0.09	0.1	0.08	0.09	1.14	1.06	0.05	0.75	0.13	0.16	0	0.0966667	0.37	1.01	0.05	0.476667	0.16	0	0	0.0533333
TraesCS5D02G543800	0.02	0	0.07	0.03	0.04	0.25	0.12	0.136667	0	0.02	0.02	0.0133333	0	0.71	0.43	0.38	0	0.07	0.09	0.0533333
TraesCS1A02G018400	0.78	1.52	1.5	1.26667	0.33	0.26	0.05	0.213333	0.05	0.12	0.09	0.0866667	0.26	0.44	0.09	0.263333	0.06	0.03	0.07	0.0533333
TraesCS5D02G522600	0	0	0	0	0.04	0	0.04	0.0266667	0	0	0	0	0.13	0.28	0.22	0.21	0.08	0	0.08	0.0533333
TraesCS5D02G511000	0	0	0	0	0	0	0	0	0	0	0	0	0	0	0.57	0.19	0.16	0	0	0.0533333
TraesCS5D02G492000	0	0	0	0	0.03	0	0	0.01	0	0	0.12	0.04	0.05	0	0.03	0.0266667	0.16	0	0	0.0533333
TraesCS1D02G001600	1.5	3.87	3.73	3.03333	3.65	6.34	7.27	5.75333	2.56	5.34	5.24	4.38	0.84	3.08	4.99	2.97	0.12	0.03	0	0.05
TraesCS5D02G550000	1.21	1.79	2.1	1.7	1.85	0.93	3.03	1.93667	0.31	0.46	0.02	0.263333	0.08	1.65	0.41	0.713333	0.14	0	0.01	0.05
TraesCS5D02G488900	0	3.67	3.63	2.43333	0.23	0.09	0	0.106667	0	1.36	3.52	1.62667	0.02	0.66	0	0.226667	0	0.15	0	0.05
TraesCS7D02G138600	0	0.07	0.03	0.0333333	0	0.15	0	0.05	0	0	0	0	0.35	0.09	0.23	0.223333	0.03	0.02	0.1	0.05
TraesCS5D02G485000	0	0	0.1	0.0333333	0.03	0.13	0	0.0533333	0.02	0	0	0.00666667	0.02	0.22	0.4	0.213333	0.08	0.01	0.06	0.05
TraesCS1A02G019600	0.01	0	0.01	0.00666667	0.04	0.16	0.39	0.196667	0.21	0.19	0.4	0.266667	0.11	0.21	0.11	0.143333	0.11	0.01	0.03	0.05
TraesCS6D02G395800	0.21	0.6	0.76	0.523333	0	0	0	0	0	0	0	0	0.17	0.12	0.03	0.106667	0.15	0	0	0.05
TraesCS6D02G376000	0	0	0	0	0.04	0.04	0	0.0266667	0	0.25	0.42	0.223333	0.15	0.07	0.07	0.0966667	0.02	0	0.13	0.05
TraesCS1A02G014300	0	0	0	0	0	0.02	0.18	0.0666667	0.95	1.28	0	0.743333	0.01	0.03	0.14	0.06	0.15	0	0	0.05
TraesCS4A02G027400	0	0.03	0	0.01	0	0	0	0	0	0	0.05	0.0166667	0	0.16	0	0.0533333	0.03	0.12	0	0.05
TraesCS5D02G541200	0	0	0	0	0.03	0	0.19	0.0733333	0.14	0	0.08	0.0733333	0.01	0.05	0.09	0.05	0.11	0.01	0.03	0.05
TraesCS6B02G052200	0.97	2.48	2.39	1.94667	0.01	0.28	0	0.0966667	0.24	0.03	0.2	0.156667	0	0	0.06	0.02	0.12	0.03	0	0.05
TraesCS6B02G054400	0.06	0.24	0.34	0.213333	0	0	0	0	0	0	0.02	0.00666667	0	0	0.01	0.00333333	0	0	0.15	0.05
TraesCS5D02G474300	0	0.09	0.15	0.08	0	0.07	0.06	0.0433333	0	0	0	0	0.11	0.39	0	0.166667	0.11	0.03	0	0.0466667
TraesCS6D02G375600	0	0.06	0.04	0.0333333	0.07	0.23	0.22	0.173333	0.05	0.57	0.61	0.41	0.04	0.07	0.05	0.0533333	0.05	0.01	0.08	0.0466667
TraesCS5D02G535000	0.05	0.04	0.07	0.0533333	0.2	0.15	0.01	0.12	0.09	0.04	0	0.0433333	0.14	0.02	0	0.0533333	0.01	0.08	0.05	0.0466667
TraesCS3D02G544500	1.95	1.09	1.41	1.48333	0.11	0	0	0.0366667	0.6	0.08	0	0.226667	0.03	0.05	0.02	0.0333333	0	0.01	0.13	0.0466667
TraesCS1D02G249800	0.49	0.6	0.59	0.56	0.71	0.89	0.82	0.806667	0.45	0.71	0.52	0.56	0.4	0.28	0.54	0.406667	0	0.08	0.05	0.0433333
TraesCS6D02G382800	0.56	0.96	1.2	0.906667	0.43	0.4	0.11	0.313333	0.63	2.42	3.58	2.21	0.13	0.56	0.39	0.36	0.09	0.02	0.02	0.0433333
TraesCS1D02G251300	0.33	0.69	0.74	0.586667	0.27	0.25	0.11	0.21	0.29	0.65	0.52	0.486667	0.32	0.41	0.09	0.273333	0.1	0.02	0.01	0.0433333
TraesCS7D02G145100	0.25	0.18	0.36	0.263333	0.82	0.53	0.89	0.746667	1.45	0.87	0.55	0.956667	0.19	0.27	0.2	0.22	0.12	0.01	0	0.0433333
TraesCS5D02G523700	0.15	0.25	0.13	0.176667	0.32	0.21	0.11	0.213333	0.1	0.15	0.06	0.103333	0.29	0.16	0.18	0.21	0.07	0.01	0.05	0.0433333
TraesCS5D02G554000	3.05	3.07	3.15	3.09	1.13	2.1	0.18	1.13667	1.02	0.89	1.57	1.16	0.15	0.21	0.26	0.206667	0.08	0.05	0	0.0433333
TraesCS6B02G057200	0.9	0.64	0.72	0.753333	0.55	0.37	0.01	0.31	0.03	0.4	0.07	0.166667	0.23	0.16	0.01	0.133333	0.05	0.03	0.05	0.0433333
TraesCS6D02G380900	0.08	0.1	0.15	0.11	0.07	0.03	0.07	0.0566667	0.02	1.96	1.98	1.32	0.03	0.13	0.08	0.08	0.06	0	0.07	0.0433333
TraesCS5A02G394500	2.29	3.03	3.08	2.8	0.03	0.34	0.13	0.166667	0.1	0.98	1.56	0.88	0	0	0.06	0.02	0	0	0.13	0.0433333
TraesCS6D02G365500	0	0.02	0.13	0.05	0.02	0.19	0.1	0.103333	0.03	0.03	0.07	0.0433333	0	0.04	0	0.0133333	0.13	0	0	0.0433333
TraesCS5A02G394700	0.31	1.86	1.92	1.36333	0.31	0.23	0	0.18	0.07	0	0	0.0233333	0.04	0	0	0.0133333	0	0.02	0.11	0.0433333
TraesCS6D02G369800	0.53	0.52	0.47	0.506667	0.03	0.03	0	0.02	0.01	0.01	0.01	0.01	0	0	0.03	0.01	0.13	0	0	0.0433333
TraesCS6D02G347500	1.97	3.4	3.57	2.98	0.32	0.1	0	0.14	0	0	0	0	0.01	0.02	0	0.01	0	0	0.13	0.0433333
TraesCS5D02G539900	0	0.03	0	0.01	0	0	0	0	0	0	0	0	0	0.02	0	0.00666667	0.13	0	0	0.0433333
TraesCS6D02G375400	0	0	0	0	0	0	0	0	0	0.06	0	0.02	0	0	0	0	0	0	0.13	0.0433333
TraesCS6B02G053500	0	0.41	0.28	0.23	0	0	0	0	0	0	0.04	0.0133333	0.26	2.5	1.14	1.3	0.12	0	0	0.04
TraesCS7D02G136500	0	0	0	0	0	0	0	0	0	0	0	0	0	0	3.1	1.03333	0.12	0	0	0.04
TraesCS1A02G023300	2.79	3.67	3.77	3.41	0.48	0.53	0	0.336667	0.02	0	0	0.00666667	0.51	0.37	0.35	0.41	0.12	0	0	0.04
TraesCS5D02G282100	0.03	0	0.02	0.0166667	0	0	0	0	0.04	0	0	0.0133333	0	0	0.56	0.186667	0.12	0	0	0.04
TraesCS1A02G030200	0.06	0.17	0.25	0.16	0.08	0.04	0.08	0.0666667	0.14	0.03	0.04	0.07	0.09	0.11	0.25	0.15	0.12	0	0	0.04
TraesCS4A02G019700	0.03	0.05	0.07	0.05	0.01	0.01	0.01	0.01	0	0.02	0.01	0.01	0.18	0.13	0.12	0.143333	0.12	0	0	0.04
TraesCS6D02G388900	2.06	1.91	2.05	2.00667	0.11	0.06	0.01	0.06	0.06	0.01	0	0.0233333	0.02	0.38	0.02	0.14	0.09	0.01	0.02	0.04
TraesCS4A02G026200	0.01	0	0	0.00333333	0.05	0.02	0.12	0.0633333	0.03	0.04	0.01	0.0266667	0.11	0.17	0.09	0.123333	0.12	0	0	0.04
TraesCS3D02G538500	3.63	2.57	2.55	2.91667	1.25	1.12	1.48	1.28333	4.28	3.03	0.71	2.67333	0	0.19	0.17	0.12	0.11	0.01	0	0.04
TraesCS6D02G369700	0.17	0.17	0.52	0.286667	0	0	0	0	0	0	0.05	0.0166667	0	0.04	0.12	0.0533333	0.12	0	0	0.04
TraesCS1A02G028400	1.41	1.63	1.58	1.54	0.31	0.22	0.01	0.18	0.01	0.01	0	0.00666667	0.03	0.05	0.08	0.0533333	0.05	0.05	0.02	0.04
TraesCS5D02G519600	0	0.41	0.11	0.173333	0.01	0	0	0.00333333	0.01	0.14	0.85	0.333333	0	0.02	0.11	0.0433333	0.08	0.03	0.01	0.04
TraesCS6D02G367000	8.76	7.82	7.8	8.12667	1.53	0.94	0	0.823333	0.17	0.12	0.09	0.126667	0.02	0.07	0	0.03	0	0	0.12	0.04
TraesCS3D02G545700	4.99	4.38	4.36	4.57667	0.08	0.17	0	0.0833333	1.83	0.05	0.02	0.633333	0.06	0	0.02	0.0266667	0.12	0	0	0.04
TraesCS5D02G283200	1.58	3.28	2.95	2.60333	0.35	0.22	0.1	0.223333	0.2	0.37	0.16	0.243333	0	0	0.04	0.0133333	0	0.12	0	0.04
TraesCS3D02G530900	0	0	0	0	0	0	0	0	0	0	0	0	0	0	0	0	0.12	0	0	0.04
TraesCS1A02G027300	4.35	4.69	4.57	4.53667	5.58	4.93	2.16	4.22333	3.82	3.34	0.08	2.41333	2.65	4.12	0.17	2.31333	0.04	0.02	0.05	0.0366667
TraesCS4A02G021800	0	0	0	0	0	0	0.06	0.02	0.04	0	0	0.0133333	0	0.03	3.33	1.12	0.11	0	0	0.0366667
TraesCS3D02G535000	0	0.07	0.03	0.0333333	0.16	1.23	2.39	1.26	0.1	0.36	1.43	0.63	0	0.29	2.55	0.946667	0.07	0.04	0	0.0366667
TraesCS5A02G404800	0.03	0	0.02	0.0166667	0.3	0.39	0.93	0.54	1.65	0.9	0.24	0.93	0.69	0.66	0.56	0.636667	0.1	0	0.01	0.0366667
TraesCS6D02G388000	0	0.22	0.08	0.1	0	0	0	0	0.29	1.53	2.23	1.35	0	0	1.76	0.586667	0	0	0.11	0.0366667
TraesCS5A02G394000	0.03	0.06	0.06	0.05	0.15	1.54	3.12	1.60333	0.34	0.21	0.29	0.28	0.04	0.67	0.2	0.303333	0.09	0.02	0	0.0366667
TraesCS5D02G481800	0	0.01	0.01	0.00666667	0.01	0	0	0.00333333	0	0	0	0	0	0	0.59	0.196667	0	0	0.11	0.0366667
TraesCS5D02G554500	0.03	0.08	0.07	0.06	0	0	0	0	0	0	0	0	0.06	0.04	0.13	0.0766667	0.04	0	0.07	0.0366667
TraesCS5D02G547200	2.21	1.49	1.53	1.74333	0.57	0.33	0	0.3	0.01	0	0.1	0.0366667	0.06	0.05	0.06	0.0566667	0.07	0.01	0.03	0.0366667
TraesCS7D02G141000	0	0.05	0	0.0166667	0	0	0	0	0	0	0	0	0.01	0.05	0.05	0.0366667	0.1	0	0.01	0.0366667
TraesCS5D02G539100	3.57	3.99	4.22	3.92667	0.38	0.25	0	0.21	0	0.01	0.01	0.00666667	0	0.03	0	0.01	0	0.03	0.08	0.0366667
TraesCS5D02G560300	0	0	0	0	1.04	0.11	0.02	0.39	0	2.07	0	0.69	0.01	0.01	0	0.00666667	0	0.09	0.02	0.0366667
TraesCS5D02G488500	0	3.6	3.5	2.36667	0.11	0.05	0	0.0533333	0	0.88	2.37	1.08333	0	0	0	0	0	0.11	0	0.0366667
TraesCS3D02G542700	0	0	0	0	0	0	0	0	0	0	0	0	0	0	0	0	0.11	0	0	0.0366667
TraesCS6D02G360200	0.15	0.16	0.09	0.133333	0.03	0	0.02	0.0166667	0.02	0	0.07	0.03	0.07	0.02	1.77	0.62	0.04	0	0.06	0.0333333
TraesCS7D02G145200	0.1	0.37	0.38	0.283333	0.64	0.61	1.38	0.876667	1.21	1.19	1.21	1.20333	0.12	0.36	0.44	0.306667	0.09	0	0.01	0.0333333
TraesCS6D02G359500	0	0	0	0	0	0	0	0	0	0	0	0	0	0.41	0	0.136667	0	0	0.1	0.0333333
TraesCS4A02G026900	0	0	0	0	0	0.02	0.09	0.0366667	0	0	0.05	0.0166667	0	0.21	0.12	0.11	0.1	0	0	0.0333333
TraesCS6D02G388300	1.42	1.52	1.59	1.51	0.06	0.03	0.05	0.0466667	0.27	0.08	0.05	0.133333	0	0.22	0.01	0.0766667	0.04	0.01	0.05	0.0333333
TraesCS5D02G553100	0.01	0.01	0.04	0.02	0.02	0.03	0.06	0.0366667	0.01	0	0	0.00333333	0.03	0.02	0.08	0.0433333	0.05	0.02	0.03	0.0333333
TraesCS7A02G134600	1.65	1.45	1.49	1.53	0.48	0.2	0.47	0.383333	0.7	0.35	0.07	0.373333	0.02	0.04	0.04	0.0333333	0	0.03	0.07	0.0333333
TraesCS6D02G365900	0.11	0.37	0.39	0.29	0.02	0.08	0.02	0.04	0	0.02	0	0.00666667	0.05	0	0.02	0.0233333	0.09	0.01	0	0.0333333
TraesCS5D02G525500	0.19	2.09	2.35	1.54333	2.17	1.41	0	1.19333	0	0.21	0	0.07	0.03	0	0	0.01	0.1	0	0	0.0333333
TraesCS5A02G403500	0	0	0	0	0	0	0.82	0.273333	0	0	0.58	0.193333	0	0	0	0	0	0	0.1	0.0333333
TraesCS5D02G538600	0.18	0.24	0.25	0.223333	2.4	2.96	3.52	2.96	4.1	3.79	3.48	3.79	0.05	1.21	2.43	1.23	0.02	0.07	0	0.03
TraesCS5D02G552200	0	0.22	0	0.0733333	0.12	0.12	1.4	0.546667	1.64	1.94	2.09	1.89	0.12	0.76	0.74	0.54	0.09	0	0	0.03
TraesCS6D02G387600	0	0.13	0	0.0433333	0	0	0	0	0	0	0	0	0.04	1.36	0	0.466667	0	0	0.09	0.03
TraesCS5D02G523200	0	0	0	0	0	0	0	0	0	0	0	0	0	0.59	0.12	0.236667	0.09	0	0	0.03
TraesCS1A02G026300	0.22	0.4	0.48	0.366667	0.36	0.31	0.44	0.37	0.08	0.18	0.06	0.106667	0.08	0.31	0.24	0.21	0.08	0	0.01	0.03
TraesCS7D02G139000	0	0.02	0	0.00666667	0.05	0	0	0.0166667	0	0	0	0	0.12	0.13	0.14	0.13	0.06	0.01	0.02	0.03
TraesCS3D02G541900	0	0.03	0.03	0.02	0	0.01	0.02	0.01	0	0	0	0	0	0.36	0	0.12	0.06	0	0.03	0.03
TraesCS4A02G026800	0.08	0.4	0.48	0.32	0.03	0.02	0.03	0.0266667	0	0.01	0.03	0.0133333	0.08	0.03	0.1	0.07	0.06	0	0.03	0.03
TraesCS5D02G484100	0	0	0	0	0	0	0	0	0	0	0.08	0.0266667	0	0.11	0	0.0366667	0	0	0.09	0.03
TraesCS4A02G024500	0	0	0	0	0	0	0	0	0.18	0.45	0.36	0.33	0.1	0	0	0.0333333	0	0	0.09	0.03
TraesCS5D02G540400	1.88	2.67	2.59	2.38	0.11	0.13	0	0.08	0.03	0.04	0	0.0233333	0.06	0.02	0	0.0266667	0.06	0	0.03	0.03
TraesCS5D02G515600	0	0.04	0.03	0.0233333	0.07	0	0	0.0233333	0.03	0	0.08	0.0366667	0	0	0.06	0.02	0.03	0	0.06	0.03
TraesCS5D02G511600	0	0	0	0	0	0	0	0	0	0	0	0	0	0	0	0	0.05	0.04	0	0.03
TraesCS7D02G146800	0	0	0	0	0	0	0	0	0.05	0	0.04	0.03	0	0	4.39	1.46333	0.08	0	0	0.0266667
TraesCS5D02G517900	0.74	0.11	0.09	0.313333	2.84	3.3	0	2.04667	0.06	0.63	0	0.23	2.52	0.54	0.03	1.03	0	0.05	0.03	0.0266667
TraesCS5D02G560200	0.03	0.97	0.88	0.626667	1.45	1.8	2.28	1.84333	1.09	3.84	4.77	3.23333	0.07	0.95	2.04	1.02	0.06	0.02	0	0.0266667
TraesCS1A02G023500	0.14	0.05	0.13	0.106667	0.87	0.6	0.07	0.513333	0.35	0.37	0	0.24	1.06	0.59	0.02	0.556667	0.07	0.01	0	0.0266667
TraesCS6D02G396400	0.1	0.2	0.18	0.16	0.27	0.29	1.3	0.62	1.16	1.47	1.61	1.41333	0.38	0.58	0.28	0.413333	0.08	0	0	0.0266667
TraesCS1A02G026500	0	0	0	0	0	0	0	0	0	0.08	0	0.0266667	0	1.14	0	0.38	0.08	0	0	0.0266667
TraesCS5D02G498900	0.02	0.01	0.02	0.0166667	0	0.02	0.01	0.01	0.01	0.02	0.01	0.0133333	0.02	0.56	0.03	0.203333	0.04	0.02	0.02	0.0266667
TraesCS3D02G528800	0.01	0	0.06	0.0233333	0.07	0.07	0.45	0.196667	0.08	0.43	2.29	0.933333	0.03	0.09	0.19	0.103333	0.06	0	0.02	0.0266667
TraesCS6D02G387500	0.01	0.02	0.05	0.0266667	0.04	0.03	0	0.0233333	0.02	0	0	0.00666667	0.16	0.05	0.06	0.09	0.05	0.01	0.02	0.0266667
TraesCS6D02G375700	0.02	0.08	0.11	0.07	0.15	0.63	0.27	0.35	0.12	2.13	2.78	1.67667	0.06	0.07	0.08	0.07	0	0.02	0.06	0.0266667
TraesCS5D02G530800	0	0	0	0	0.05	0	0.08	0.0433333	1.02	4.57	5.41	3.66667	0.07	0.04	0	0.0366667	0.04	0	0.04	0.0266667
TraesCS5D02G278100	0.49	1.73	1.71	1.31	0.04	0.2	0.15	0.13	0.07	0.05	1.97	0.696667	0.02	0	0.05	0.0233333	0.04	0.01	0.03	0.0266667
TraesCS5D02G516400	0.25	0.34	0.35	0.313333	0.13	0	0	0.0433333	0.39	0.13	0.06	0.193333	0.03	0.03	0.01	0.0233333	0	0	0.08	0.0266667
TraesCS5D02G558000	0.04	0.06	0	0.0333333	0	0	0	0	0	0.1	1.41	0.503333	0	0	0	0	0.08	0	0	0.0266667
TraesCS1A02G020100	0.93	1.11	1	1.01333	0	0.86	0	0.286667	0	0	0	0	0	0	0	0	0	0	0.08	0.0266667
TraesCS7D02G144300	0.39	0.19	0.19	0.256667	0	0	0	0	0	0	0	0	0	0	0	0	0.04	0	0.04	0.0266667
TraesCS6B02G054200	0	0	0	0	0	0	0	0	0	0	0	0	0	0	0	0	0	0.08	0	0.0266667
TraesCS3D02G533200	0.01	0.01	0.01	0.01	3.1	3.16	0	2.08667	0	0.36	0.02	0.126667	3.35	3.51	1.9	2.92	0.07	0	0	0.0233333
TraesCS5D02G548000	0.92	0.54	0.69	0.716667	0.1	0.17	0	0.09	0	0.05	0.12	0.0566667	0.31	1.14	0.29	0.58	0.03	0	0.04	0.0233333
TraesCS6D02G370700	0	0	0	0	0	0	0	0	0	0	0	0	0	0.02	1.34	0.453333	0.07	0	0	0.0233333
TraesCS6B02G061500	0.05	0.11	0.09	0.0833333	0.16	0.13	0.06	0.116667	0	0.05	0	0.0166667	0.2	0.32	0.3	0.273333	0	0.02	0.05	0.0233333
TraesCS5D02G555200	0.13	0.61	0.34	0.36	0.2	0.18	0.13	0.17	0.33	0.22	0.34	0.296667	0.25	0.24	0.28	0.256667	0.01	0.01	0.05	0.0233333
TraesCS5D02G281200	0.01	0.36	0.2	0.19	0.02	0.98	0.8	0.6	0.09	1.18	2.47	1.24667	0.03	0.02	0.64	0.23	0.05	0.01	0.01	0.0233333
TraesCS5D02G487400	0	0	0	0	0	0	0	0	0	0	0	0	0	0.57	0	0.19	0	0	0.07	0.0233333
TraesCS6D02G362100	2.21	2.82	2.79	2.60667	0.19	0.06	0	0.0833333	0.09	0.11	0.01	0.07	0.26	0.22	0	0.16	0.07	0	0	0.0233333
TraesCS1A02G031800	0.03	0.11	0.09	0.0766667	0.03	0.04	0.02	0.03	0.02	0	0.01	0.01	0.04	0.08	0.04	0.0533333	0.04	0.02	0.01	0.0233333
TraesCS1A02G030300	0	0.04	0.02	0.02	0.03	0.03	0.02	0.0266667	0	0	0.01	0.00333333	0.02	0.05	0.07	0.0466667	0.05	0.01	0.01	0.0233333
TraesCS5D02G539200	0.43	0.84	0.96	0.743333	0.01	0.41	0.11	0.176667	0.18	0.08	0.03	0.0966667	0	0.13	0	0.0433333	0	0	0.07	0.0233333
TraesCS5D02G560500	0.32	0.32	0.3	0.313333	0.06	0.07	0.04	0.0566667	0	0.01	0.03	0.0133333	0	0.07	0.05	0.04	0.02	0.01	0.04	0.0233333
TraesCS5D02G477400	0.43	1.23	1.35	1.00333	0	0.22	0.36	0.193333	0.12	0.17	0.36	0.216667	0	0.01	0.07	0.0266667	0.07	0	0	0.0233333
TraesCS6D02G366400	0.02	0.11	0.14	0.09	0	0.03	0	0.01	0	0	0.03	0.01	0	0	0.07	0.0233333	0.02	0	0.05	0.0233333
TraesCS5D02G473600	0.06	0.11	0.26	0.143333	0	0	0	0	0	0.07	0.22	0.0966667	0	0	0	0	0	0	0.07	0.0233333
TraesCS5D02G559700	0	0	0	0	0	0	0.08	0.0266667	0	0	0	0	0	0	0	0	0.07	0	0	0.0233333
TraesCS5A02G400300	0.56	0.47	0.75	0.593333	1.97	0.54	0.21	0.906667	0.31	0.52	0	0.276667	2.01	1.25	0.02	1.09333	0	0.02	0.04	0.02
TraesCS7A02G136600	0	0	0	0	0	0	0.01	0.00333333	0	0	0	0	0	0	3.11	1.03667	0.06	0	0	0.02
TraesCS1A02G023600	0.32	0.19	0.28	0.263333	1.15	1.77	2.29	1.73667	0.49	0.83	0.45	0.59	1.44	1.05	0.36	0.95	0.05	0.01	0	0.02
TraesCS6D02G395400	0.03	0.08	0.03	0.0466667	2.18	1.21	0.01	1.13333	0.13	0.45	0	0.193333	1.02	0.21	0.02	0.416667	0	0.02	0.04	0.02
TraesCS5D02G549000	0.18	0	0.17	0.116667	0	0	0	0	0.06	0	0	0.02	0	0.21	0.51	0.24	0	0.06	0	0.02
TraesCS3D02G541000	2.36	3.02	3.26	2.88	0.41	0.07	0.01	0.163333	0	0.01	0	0.00333333	0.04	0.36	0.04	0.146667	0	0	0.06	0.02
TraesCS5D02G284400	0	0	0	0	0	0	0	0	0	0	0	0	0	0.33	0.02	0.116667	0	0	0.06	0.02
TraesCS5D02G520399	0.04	0.09	0.07	0.0666667	0.08	0.05	0.04	0.0566667	0.02	0.04	0.02	0.0266667	0.13	0.08	0.13	0.113333	0.04	0.01	0.01	0.02
TraesCS5D02G540500	0.13	0.15	0.24	0.173333	0.1	0.04	0.1	0.08	0.02	0.06	0.01	0.03	0.09	0.11	0.1	0.1	0.01	0.01	0.04	0.02
TraesCS5D02G555700	0	0	0	0	0.01	0	0.05	0.02	0.01	0.02	0.04	0.0233333	0.1	0.07	0.13	0.1	0.04	0	0.02	0.02
TraesCS3D02G545500	0	0	0	0	0	0	0	0	0	0	0	0	0	0.3	0	0.1	0.06	0	0	0.02
TraesCS5D02G504000	0	0	0	0	0	0	0	0	0	0	0	0	0	0	0.25	0.0833333	0.06	0	0	0.02
TraesCS5D02G519400	1.96	2.71	2.75	2.47333	0.07	0.12	0.01	0.0666667	0.01	0.09	1.42	0.506667	0.13	0.08	0.03	0.08	0	0.06	0	0.02
TraesCS1A02G018200	2.81	2.48	2.9	2.73	0.03	0.03	0	0.02	0	0	0.03	0.01	0	0.11	0	0.0366667	0.03	0	0.03	0.02
TraesCS3D02G537700	0.47	0.17	0.06	0.233333	0	0	0	0	0	0	0	0	0	0	0.05	0.0166667	0	0	0.06	0.02
TraesCS5A02G405600	0.02	0.55	0.23	0.266667	0.25	0.11	0	0.12	0.07	0.08	0	0.05	0.02	0.02	0	0.0133333	0.06	0	0	0.02
TraesCS5D02G532000	0.03	0.41	0.24	0.226667	0	0.01	0	0.00333333	0.05	0.03	0.06	0.0466667	0	0.02	0	0.00666667	0.06	0	0	0.02
TraesCS7A02G136700	0.03	0	0.07	0.0333333	0	0.02	0.02	0.0133333	0	0.02	0.09	0.0366667	0	0.02	0	0.00666667	0	0	0.06	0.02
TraesCS1A02G019900	0.02	0	0.06	0.0266667	0.13	0.13	0	0.0866667	0.06	0	0	0.02	0	0	0	0	0	0.03	0.03	0.02
TraesCS3D02G530100	0.03	0.1	0.02	0.05	0	0	0	0	0	0	0	0	0	0	0	0	0	0.04	0.02	0.02
TraesCS1A02G028300	0	0	0	0	0	0	0	0	0	0	0	0	0	0	0	0	0	0.06	0	0.02
TraesCS6D02G367300	2.13	1.41	1.67	1.73667	2.23	4.75	5.95	4.31	2.25	4.28	4.67	3.73333	1	1.63	4.26	2.29667	0.05	0	0	0.0166667
TraesCS5D02G508100	0	0	0.06	0.02	0	0	0	0	0	0	0	0	0	0	4.82	1.60667	0.05	0	0	0.0166667
TraesCS6D02G380000	0.02	0.01	0	0.01	0.1	2.21	2.17	1.49333	0.12	2.17	2.86	1.71667	0	0.1	4.67	1.59	0.05	0	0	0.0166667
TraesCS5D02G548100	1.48	0.94	1.23	1.21667	0.14	0.35	0	0.163333	0	0.04	0.27	0.103333	0.54	1.57	0.52	0.876667	0.03	0	0.02	0.0166667
TraesCS4A02G018300	0.09	0.05	0.05	0.0633333	0	0	0	0	0	1.07	0.64	0.57	0.43	0.33	0.35	0.37	0.05	0	0	0.0166667
TraesCS5D02G535900	0.29	0.15	0.15	0.196667	0.4	0.13	0.07	0.2	0.17	0.23	0.04	0.146667	0.43	0.45	0.06	0.313333	0.02	0	0.03	0.0166667
TraesCS5D02G552800	2.38	2.74	2.8	2.64	0.74	1.92	1.83	1.49667	1.77	0.99	0.74	1.16667	0.01	0.19	0.63	0.276667	0	0.01	0.04	0.0166667
TraesCS5D02G502100	0	0	0	0	0.22	0.18	0.12	0.173333	0	0.03	0.05	0.0266667	0.04	0.63	0.12	0.263333	0.05	0	0	0.0166667
TraesCS5D02G281900	0	0	0	0	0	0	0	0	0	0	0	0	0.02	0.62	0	0.213333	0.02	0	0.03	0.0166667
TraesCS1A02G017800	0.01	0.01	0.01	0.01	0.11	0.07	0.06	0.08	0.02	0.2	0.16	0.126667	0.17	0.31	0.07	0.183333	0.03	0	0.02	0.0166667
TraesCS1A02G017900	0	0.81	1.02	0.61	0.07	0.71	0.04	0.273333	0.82	3.62	4.85	3.09667	0	0.15	0.35	0.166667	0	0.05	0	0.0166667
TraesCS6D02G344000	0.24	0.13	0.17	0.18	0.02	0.04	0	0.02	0.06	0.22	0.02	0.1	0	0	0.43	0.143333	0	0.01	0.04	0.0166667
TraesCS6D02G361700	0.02	0.01	0.01	0.0133333	0.05	0.04	0.04	0.0433333	0.02	0	0	0.00666667	0.02	0.13	0.13	0.0933333	0.04	0	0.01	0.0166667
TraesCS5D02G502400	0.03	0.02	0.06	0.0366667	0.2	0.21	1.34	0.583333	0.7	2.07	2.4	1.72333	0	0	0.26	0.0866667	0.05	0	0	0.0166667
TraesCS4A02G023400	1.52	1.94	2.06	1.84	0.02	0	0.02	0.0133333	0.28	0.08	0	0.12	0.03	0.16	0.07	0.0866667	0	0	0.05	0.0166667
TraesCS5D02G514400	0	0	0	0	0	0.05	0	0.0166667	0.08	0	0.12	0.0666667	0.15	0.08	0	0.0766667	0.05	0	0	0.0166667
TraesCS6D02G373200	0	0	0	0	0.41	0.42	0.08	0.303333	0	0.11	0	0.0366667	0.02	0.13	0.08	0.0766667	0.05	0	0	0.0166667
TraesCS1A02G018000	0.02	0.08	0.27	0.123333	0.02	0.2	0	0.0733333	0.02	1.04	2.58	1.21333	0.01	0.01	0.2	0.0733333	0.02	0.03	0	0.0166667
TraesCS5D02G502800	1.15	1.15	1.37	1.22333	0.43	0.29	0.06	0.26	0.06	0.04	0	0.0333333	0.15	0.04	0	0.0633333	0.02	0.02	0.01	0.0166667
TraesCS5D02G520500	0.2	0.31	0.43	0.313333	0.01	0.03	0.02	0.02	0.01	0.03	0	0.0133333	0.01	0.06	0.08	0.05	0.05	0	0	0.0166667
TraesCS1D02G252300	0.06	0.11	0	0.0566667	0	0	0	0	0	0	0	0	0.15	0	0	0.05	0	0	0.05	0.0166667
TraesCS5D02G537100	1.77	1.45	1.81	1.67667	0.04	0.04	0.02	0.0333333	0	0.04	0.23	0.09	0.05	0.02	0.05	0.04	0.02	0	0.03	0.0166667
TraesCS6D02G394400	1.42	1.73	1.81	1.65333	0.32	0.3	0.06	0.226667	0.03	0.04	0.01	0.0266667	0.03	0.03	0.04	0.0333333	0.03	0.01	0.01	0.0166667
TraesCS7D02G139500	0.83	1.15	1.07	1.01667	0.1	0	0	0.0333333	0.03	0	0	0.01	0	0	0.07	0.0233333	0	0	0.05	0.0166667
TraesCS5D02G486800	0	0	0.02	0.00666667	0.07	0.02	0	0.03	0	0	0	0	0.03	0	0.03	0.02	0.03	0.02	0	0.0166667
TraesCS4A02G018200	0	0	0	0	0	0	0	0	0	0	0.48	0.16	0.05	0	0	0.0166667	0	0	0.05	0.0166667
TraesCS1A02G031100	2	0.86	0.82	1.22667	5.81	2.48	0	2.76333	6.92	1.28	0	2.73333	0	0.02	0	0.00666667	0.03	0	0.02	0.0166667
TraesCS5D02G548600	0.8	0.93	0.99	0.906667	0.28	0.21	0	0.163333	0	0	0	0	0	0.01	0.01	0.00666667	0	0.02	0.03	0.0166667
TraesCS6D02G388600	0	0	0	0	0.07	0	0	0.0233333	0	0	0	0	0	0	0	0	0	0	0.05	0.0166667
TraesCS6D02G382900	0.02	4.04	3.72	2.59333	0	0	0	0	0	0	0	0	0	0	0	0	0	0	0.05	0.0166667
TraesCS7D02G141500	0	0	0.03	0.01	0	0	0	0	0	0	0	0	0	0	0	0	0	0	0.05	0.0166667
TraesCS1D02G000906	0	0	0	0	0	0	0	0	0	0	0	0	0	0	0	0	0	0.05	0	0.0166667
TraesCS5D02G477200	0	0	0	0	0	0	0	0	0	0	0	0	0	0	0	0	0	0	0.05	0.0166667
TraesCS7D02G135300	0	0	0	0	0	0	0	0	0	0	0	0	0	0	0	0	0	0.05	0	0.0166667
TraesCS6B02G053200	0	0	0	0	0	0.09	0	0.03	0	0.1	0	0.0333333	0.18	1.92	3.51	1.87	0.04	0	0	0.0133333
TraesCS5D02G564500	0	0.01	0	0.00333333	0.88	0.32	0	0.4	0.12	0.33	0.34	0.263333	1.14	1.75	1.28	1.39	0	0	0.04	0.0133333
TraesCS5D02G543300	0.59	0.17	0.17	0.31	2.05	2.16	0.02	1.41	2.33	3.15	0.05	1.84333	2.59	0.31	0.12	1.00667	0.02	0.02	0	0.0133333
TraesCS5D02G526800	0	0	0	0	0.06	0.09	0.05	0.0666667	0.51	1.07	0	0.526667	0	1.98	0.62	0.866667	0.04	0	0	0.0133333
TraesCS5D02G521700	1.45	1.88	1.99	1.77333	2.7	3.39	0	2.03	0.61	1.79	0	0.8	1.55	0.48	0	0.676667	0	0.03	0.01	0.0133333
TraesCS4A02G023700	0.02	0.01	0.03	0.02	0.04	0.03	0.06	0.0433333	0	0.01	0.02	0.01	0.01	0.03	1.37	0.47	0.04	0	0	0.0133333
TraesCS5D02G543500	0.01	0.03	0.02	0.02	0.66	0.21	0.06	0.31	0.36	0.28	0.02	0.22	0.84	0.38	0	0.406667	0.02	0.01	0.01	0.0133333
TraesCS1A02G023200	0.87	1.94	1.78	1.53	0.37	0.52	1.41	0.766667	0.18	0.1	0.82	0.366667	0.05	0.48	0.42	0.316667	0.02	0	0.02	0.0133333
TraesCS7A02G131600	1.12	0.79	0.7	0.87	0.18	1.05	0.8	0.676667	2.2	3.24	3.75	3.06333	0.13	0.5	0.25	0.293333	0.01	0	0.03	0.0133333
TraesCS6D02G394900	0.18	0.24	0.21	0.21	0.31	0.19	0.07	0.19	0.07	0.09	0.04	0.0666667	0.44	0.16	0.13	0.243333	0.04	0	0	0.0133333
TraesCS6D02G390300	0	0	0	0	0	0.06	0.02	0.0266667	0.01	0	0.02	0.01	0	0.61	0.04	0.216667	0.03	0.01	0	0.0133333
TraesCS6B02G054300	0	0	0	0	0	0	0	0	0	0	0	0	0	0	0.58	0.193333	0.04	0	0	0.0133333
TraesCS5D02G542600	0.02	0.01	0	0.01	0	0.05	0.35	0.133333	0.03	4.62	6.17	3.60667	0	0.01	0.52	0.176667	0.04	0	0	0.0133333
TraesCS4A02G018100	0	0	0	0	0	0.02	0	0.00666667	0	0	0.02	0.00666667	0	0.02	0.51	0.176667	0	0	0.04	0.0133333
TraesCS3D02G543200	0	0	0	0	0	0	0	0	0	0	0	0	0.01	0.46	0	0.156667	0	0	0.04	0.0133333
TraesCS5A02G398200	2.84	3.64	3.74	3.40667	0.76	0.29	1.11	0.72	0.26	0.46	0.55	0.423333	0.01	0.1	0.28	0.13	0.01	0.03	0	0.0133333
TraesCS6D02G368100	0	0	0.01	0.00333333	0	0	0	0	0	0	0	0	0	0.38	0	0.126667	0.04	0	0	0.0133333
TraesCS5D02G548900	0.13	0.12	0.14	0.13	0.75	0.15	0	0.3	1.23	0.64	0	0.623333	0.18	0.19	0	0.123333	0	0.04	0	0.0133333
TraesCS5D02G561300	0.03	0.02	0.04	0.03	0.06	0.03	0	0.03	0.01	0.01	0	0.00666667	0.15	0.09	0.09	0.11	0.04	0	0	0.0133333
TraesCS6D02G351600	0.27	0.48	0.36	0.37	0	0	0	0	0	0	0	0	0.16	0.06	0.05	0.09	0.04	0	0	0.0133333
TraesCS5D02G493900	2.38	1.94	1.56	1.96	0.09	0.63	0.02	0.246667	0	0	0.04	0.0133333	0	0	0.25	0.0833333	0.02	0	0.02	0.0133333
TraesCS4A02G016500	0.44	0.55	0.4	0.463333	0.05	0.07	0	0.04	0	0.06	0	0.02	0.18	0.04	0.02	0.08	0.04	0	0	0.0133333
TraesCS5D02G513000	2.63	3.15	2.97	2.91667	0	0.08	0.05	0.0433333	0	0	0.79	0.263333	0.02	0	0.18	0.0666667	0.04	0	0	0.0133333
TraesCS1A02G018600	0.01	0	0.01	0.00666667	0.09	0.02	0.11	0.0733333	0.25	0.99	3.09	1.44333	0.1	0.04	0.03	0.0566667	0.04	0	0	0.0133333
TraesCS7A02G134500	3.83	3.79	3.68	3.76667	0.02	0	0.01	0.01	0.01	0.01	0.02	0.0133333	0.07	0.05	0.04	0.0533333	0.03	0	0.01	0.0133333
TraesCS1D02G002900	0	0	0.01	0.00333333	0.03	0.03	0.05	0.0366667	0.12	0.73	0.87	0.573333	0.03	0.01	0.1	0.0466667	0.02	0	0.02	0.0133333
TraesCS5D02G476000	0	0	0	0	0.01	0.07	2.52	0.866667	0.05	0.59	0.77	0.47	0.01	0	0.13	0.0466667	0.03	0	0.01	0.0133333
TraesCS6D02G386400	2.02	1.48	1.38	1.62667	0.44	0.18	0.22	0.28	0.31	0.41	0.06	0.26	0.02	0.09	0.03	0.0466667	0.04	0	0	0.0133333
TraesCS7D02G147100	0.16	0.13	0.4	0.23	0.31	0.37	0.04	0.24	0	0.06	0	0.02	0.12	0	0	0.04	0.04	0	0	0.0133333
TraesCS7D02G143400	0.1	0.34	0.44	0.293333	0.1	0.23	0.05	0.126667	0.02	0.06	0.14	0.0733333	0.04	0.02	0.05	0.0366667	0.03	0.01	0	0.0133333
TraesCS5D02G539000	0	0.63	0.11	0.246667	0	0	0.11	0.0366667	0	0	0	0	0	0.11	0	0.0366667	0	0.04	0	0.0133333
TraesCS6D02G385100	2.76	3.27	3.42	3.15	0.14	0.09	0.23	0.153333	0.03	0.04	0.21	0.0933333	0.06	0	0.02	0.0266667	0.02	0	0.02	0.0133333
TraesCS6D02G352800	0.3	2.21	2.23	1.58	0.4	0.61	0.47	0.493333	0.08	0.37	1.52	0.656667	0	0.02	0.04	0.02	0.02	0	0.02	0.0133333
TraesCS1A02G023100	0.1	0.92	1.19	0.736667	0.05	0.03	0	0.0266667	0	0.03	0.02	0.0166667	0.03	0.03	0	0.02	0.04	0	0	0.0133333
TraesCS5D02G497500	0	0	0	0	0	0	0	0	0	0	0	0	0	0	0.04	0.0133333	0.04	0	0	0.0133333
TraesCS7D02G135200	0	0	0	0	0	0	0	0	0	0	0.02	0.00666667	0	0	0	0	0	0.04	0	0.0133333
TraesCS7A02G136200	0	0	0	0	0	0	0	0	0	0	0	0	0	0	0	0	0.04	0	0	0.0133333
TraesCS5D02G559300	0.04	0.69	0.53	0.42	1.86	3.76	4.1	3.24	0.71	2.42	4.02	2.38333	0.01	0.37	3.25	1.21	0.01	0.01	0.01	0.01
TraesCS5A02G401100	0.54	0.45	0.48	0.49	0.36	0.49	0.31	0.386667	0.42	0.69	1.01	0.706667	0.83	1.33	0.86	1.00667	0.03	0	0	0.01
TraesCS5D02G476700	0.05	0.18	0.14	0.123333	0.62	0.77	1.11	0.833333	0.16	0.31	0.16	0.21	0.24	1.13	0.87	0.746667	0.02	0.01	0	0.01
TraesCS7D02G145700	0.31	0.65	0.68	0.546667	0.31	1.02	2.41	1.24667	0.21	0.21	0.18	0.2	0.04	1.52	0.45	0.67	0	0	0.03	0.01
TraesCS4A02G021500	0.44	0.06	0.07	0.19	0.04	0	0	0.0133333	1.47	1.48	0.76	1.23667	0.1	0.26	1.29	0.55	0.03	0	0	0.01
TraesCS5D02G472700	0.18	0.52	0.48	0.393333	0.06	0.18	0.08	0.106667	0.04	0.02	0	0.02	0.21	0.64	0.55	0.466667	0.03	0	0	0.01
TraesCS5D02G518900	0.01	0.02	0.01	0.0133333	0.35	0.31	0.01	0.223333	0.21	0.15	0.03	0.13	0.79	0.27	0	0.353333	0.01	0	0.02	0.01
TraesCS5D02G529900	0	0	0	0	0	0	0	0	0	0	0	0	0	1.04	0	0.346667	0	0	0.03	0.01
TraesCS7D02G147200	0.46	0.68	0.54	0.56	0.91	0.4	0	0.436667	0.03	0.1	0.4	0.176667	0.34	0.25	0.1	0.23	0.03	0	0	0.01
TraesCS5D02G279800	0	0	0.03	0.01	0.03	0.03	0.06	0.04	0	0	0	0	0.18	0.19	0.11	0.16	0.03	0	0	0.01
TraesCS5D02G514300	0.01	0.01	0.01	0.01	0	0.01	0	0.00333333	0	0	0.05	0.0166667	0.03	0.43	0.01	0.156667	0.01	0.01	0.01	0.01
TraesCS3D02G543600	0	0.02	0.01	0.01	0	0	0	0	0	0.01	0.02	0.01	0.01	0.4	0.04	0.15	0	0	0.03	0.01
TraesCS6D02G376700	5.43	3.13	3.47	4.01	0.43	2.77	2.48	1.89333	0.02	0.13	0.39	0.18	0.04	0.14	0.21	0.13	0.03	0	0	0.01
TraesCS6D02G396500	0.1	0.03	0.09	0.0733333	2.88	3.17	1.44	2.49667	2.69	2.03	0.05	1.59	0.21	0.15	0.01	0.123333	0	0.03	0	0.01
TraesCS6D02G372800	1.44	1.69	1.55	1.56	0.67	0.35	0.01	0.343333	0	0.03	0.01	0.0133333	0.08	0.2	0.01	0.0966667	0.01	0.01	0.01	0.01
TraesCS6D02G383900	0	0.05	0.04	0.03	0	0.05	0.03	0.0266667	0	0.08	0.63	0.236667	0.03	0.02	0.22	0.09	0.03	0	0	0.01
TraesCS3D02G540700	0.29	0.2	0.2	0.23	0.03	0	0	0.01	0.03	0	0	0.01	0	0	0.26	0.0866667	0	0.03	0	0.01
TraesCS5D02G475700	0.02	0.11	0.12	0.0833333	0	0.1	0.13	0.0766667	0	0.05	0.19	0.08	0.03	0.03	0.15	0.07	0.03	0	0	0.01
TraesCS5D02G527600	0	0.01	0.03	0.0133333	0.15	0.06	0.02	0.0766667	0.01	0.2	1.45	0.553333	0.07	0	0.13	0.0666667	0.02	0.01	0	0.01
TraesCS5D02G565900	0.02	0.01	0.01	0.0133333	0.01	0.05	0.03	0.03	0.01	0.03	0.01	0.0166667	0.02	0.04	0.13	0.0633333	0.02	0.01	0	0.01
TraesCS6D02G354400	0	0.03	0	0.01	0	0.01	0	0.00333333	0	0	0	0	0	0.1	0.07	0.0566667	0.03	0	0	0.01
TraesCS5D02G497600	0	0	0	0	0	0	0	0	0	0	0	0	0	0.17	0	0.0566667	0	0	0.03	0.01
TraesCS6B02G060100	0.02	0.22	0.46	0.233333	0.03	0.01	0.19	0.0766667	0	0.01	0.07	0.0266667	0.03	0	0.12	0.05	0.03	0	0	0.01
TraesCS1D02G004800	2.27	2.29	2.49	2.35	0.06	0.13	0.03	0.0733333	0	0.01	0	0.00333333	0	0.14	0	0.0466667	0.03	0	0	0.01
TraesCS6D02G346900	0	0.02	0.01	0.01	0.01	0.04	0.01	0.02	0	0	0.01	0.00333333	0.02	0.06	0.05	0.0433333	0.03	0	0	0.01
TraesCS7A02G135900	0	0	0	0	0	0	0	0	0	0	0	0	0	0	0.09	0.03	0.03	0	0	0.01
TraesCS7A02G133600	0	0	0	0	0	0.02	0.03	0.0166667	0.1	1.62	2.16	1.29333	0	0.06	0.02	0.0266667	0.03	0	0	0.01
TraesCS1A02G014900	0.02	0.16	0.23	0.136667	0.09	1.6	0.36	0.683333	0	0.02	0.02	0.0133333	0	0.01	0.07	0.0266667	0.03	0	0	0.01
TraesCS6D02G362200	2.7	2.82	2.97	2.83	0.29	0.2	0	0.163333	0.96	0.29	0.3	0.516667	0	0.06	0.01	0.0233333	0.03	0	0	0.01
TraesCS6D02G353400	0	0	0	0	0.02	0	0	0.00666667	0	0.02	0.02	0.0133333	0.07	0	0	0.0233333	0.03	0	0	0.01
TraesCS6D02G381100	0	0	0	0	0	0.04	0.27	0.103333	0.01	0.82	1.47	0.766667	0	0	0.06	0.02	0.03	0	0	0.01
TraesCS5D02G499800	0	0	0	0	0	0	0	0	0.03	0	0	0.01	0	0	0.06	0.02	0	0	0.03	0.01
TraesCS6D02G361400	0	0	0	0	0.02	0.03	0.43	0.16	1.09	1.59	1.25	1.31	0	0	0.05	0.0166667	0.01	0.02	0	0.01
TraesCS5D02G559800	0	0	0	0	0	0.05	0	0.0166667	0.05	0	0.34	0.13	0	0	0.04	0.0133333	0.02	0.01	0	0.01
TraesCS5D02G525300	0.68	2.07	2.57	1.77333	1.54	2.37	0	1.30333	0.16	0.19	0	0.116667	0	0.03	0	0.01	0	0	0.03	0.01
TraesCS5D02G279300	0.02	0.38	0.21	0.203333	0.07	0.05	0.05	0.0566667	0	0	0.32	0.106667	0.03	0	0	0.01	0.03	0	0	0.01
TraesCS1A02G023000	0.13	1.1	1.24	0.823333	0.01	0.02	0	0.01	0.01	0.02	0.1	0.0433333	0.02	0.01	0	0.01	0.03	0	0	0.01
TraesCS1A02G016100	0.2	0.73	0.85	0.593333	0.1	1.24	0.04	0.46	0	0.08	0.41	0.163333	0.01	0	0	0.00333333	0.03	0	0	0.01
TraesCS5D02G488800	0	3.14	3.11	2.08333	0.22	0.02	0	0.08	0.09	1.28	3.51	1.62667	0	0	0	0	0	0.03	0	0.01
TraesCS5D02G488300	0	2.82	3.32	2.04667	0.15	0	0	0.05	0	0.5	1.29	0.596667	0	0	0	0	0	0.03	0	0.01
TraesCS6B02G056500	0.28	0.54	0.59	0.47	0.01	0	0	0.00333333	0	0	0	0	0	0	0	0	0	0.03	0	0.01
TraesCS1D02G252600	0.5	1.89	1.69	1.36	0	0	0	0	0	0	0	0	0	0	0	0	0	0	0.03	0.01
TraesCS1D02G003200	0	0	0	0	0	0	0	0	0	0	0	0	0	0	0	0	0.03	0	0	0.01
TraesCS5D02G474400	0	0	0	0	0	0	0	0	0	0	0	0	0	0	0	0	0	0	0.03	0.01
TraesCS6B02G057600	0	0	0	0	0	0	0	0	0	0	0	0	0	0	0	0	0	0	0.03	0.01
TraesCS7A02G135400	0	0	0	0	0	0	0	0	0	0	0	0	0	0	0	0	0.02	0.01	0	0.01
TraesCS7D02G135600	0	0	0	0	0	0	0	0	0	0	0	0	0	0	0	0	0.02	0.01	0	0.01
TraesCS6D02G396100	0.58	0.24	0.31	0.376667	0.97	1.06	0.06	0.696667	1.1	0.71	0.02	0.61	1.75	1.11	0.04	0.966667	0.02	0	0	0.00666667
TraesCS7D02G140500	0.07	0.02	0.05	0.0466667	0.56	0.06	0	0.206667	0.02	0	0	0.00666667	0.21	1.98	0	0.73	0.02	0	0	0.00666667
TraesCS6B02G059100	0	0	0	0	0	0	0	0	0	0	0	0	0	0	1.97	0.656667	0.02	0	0	0.00666667
TraesCS5D02G471700	0.06	0	0.07	0.0433333	0.29	0.12	0.02	0.143333	0	0	0	0	1.35	0.4	0.08	0.61	0.02	0	0	0.00666667
TraesCS5D02G513400	2.75	3.06	2.87	2.89333	1.88	0.73	0.77	1.12667	0.16	0.12	0.13	0.136667	0.13	1.21	0.33	0.556667	0.02	0	0	0.00666667
TraesCS5D02G561600	0.15	0.17	0.13	0.15	0.02	0.02	0.04	0.0266667	0	0	0.11	0.0366667	0.14	0.08	1.16	0.46	0.02	0	0	0.00666667
TraesCS6D02G384800	0.29	0.14	0.16	0.196667	0.24	0.63	1.38	0.75	0.39	2.68	2.68	1.91667	0.03	0.13	1.1	0.42	0.01	0.01	0	0.00666667
TraesCS6D02G395300	1.2	1.19	1.41	1.26667	1.2	0.82	0	0.673333	0.01	0.12	0	0.0433333	0.52	0.73	0.01	0.42	0.02	0	0	0.00666667
TraesCS5D02G548700	0	0	0	0	0	0	0.03	0.01	0	0.01	0.37	0.126667	0	0.57	0.5	0.356667	0.02	0	0	0.00666667
TraesCS4A02G018400	0	0	0.04	0.0133333	0	0.07	0	0.0233333	0	0.02	0	0.00666667	0.02	0	1.05	0.356667	0.02	0	0	0.00666667
TraesCS1A02G023700	0.22	1.58	1.42	1.07333	0.13	1.43	1.09	0.883333	0.85	1.67	1.07	1.19667	0.03	0.31	0.56	0.3	0	0.02	0	0.00666667
TraesCS5D02G483800	0.02	0	0	0.00666667	0	0	0	0	0	0	0	0	0	0.63	0.02	0.216667	0.02	0	0	0.00666667
TraesCS5D02G542500	0.09	0.19	0.21	0.163333	0.05	0.07	0.01	0.0433333	0.01	0.02	0	0.01	0.08	0.18	0.07	0.11	0.02	0	0	0.00666667
TraesCS5D02G494100	1.14	1.34	1.28	1.25333	0.02	0.03	0	0.0166667	0	0	0.02	0.00666667	0	0	0.25	0.0833333	0.02	0	0	0.00666667
TraesCS4A02G026203	0	0	0	0	0	0	0.09	0.03	0	0	0.01	0.00333333	0	0	0.18	0.06	0.02	0	0	0.00666667
TraesCS6D02G346300	0.55	1.67	1.47	1.23	0.34	0.63	0.04	0.336667	0.01	2.65	1.93	1.53	0.06	0.03	0.06	0.05	0.02	0	0	0.00666667
TraesCS5D02G472500	0	0	0	0	0	0	0	0	0	0	0	0	0.06	0.04	0.05	0.05	0	0	0.02	0.00666667
TraesCS5D02G559600	0	0	0	0	0	0.08	0.13	0.07	0	1.03	0.35	0.46	0	0	0.11	0.0366667	0	0.02	0	0.00666667
TraesCS5D02G477000	0	0.05	0.06	0.0366667	0	0.09	0.11	0.0666667	0	0	0.11	0.0366667	0	0.11	0	0.0366667	0	0.02	0	0.00666667
TraesCS7D02G140800	1.38	1.65	1.73	1.58667	0.19	0.14	0	0.11	0	0	0	0	0	0.11	0	0.0366667	0	0.02	0	0.00666667
TraesCS1A02G025400	0	0	0	0	0	0	0	0	0	0	0	0	0.06	0.02	0.02	0.0333333	0.02	0	0	0.00666667
TraesCS6D02G377400	0	0.02	0	0.00666667	0.07	0.04	0.02	0.0433333	0	0.02	0.02	0.0133333	0.03	0.05	0.01	0.03	0.01	0.01	0	0.00666667
TraesCS5D02G527300	0	0	0.04	0.0133333	0	0	0	0	0	0	0	0	0	0.05	0.02	0.0233333	0	0	0.02	0.00666667
TraesCS6D02G392500	0	0	0	0	0	0.02	0.02	0.0133333	0.01	0.31	1.34	0.553333	0	0	0.05	0.0166667	0.01	0.01	0	0.00666667
TraesCS1A02G015800	0.58	1.8	1.55	1.31	0.47	0.76	0.48	0.57	0.02	0.02	0.04	0.0266667	0	0	0.05	0.0166667	0.02	0	0	0.00666667
TraesCS6D02G354600	0	0	0	0	0.02	0	0.02	0.0133333	0	0.02	0	0.00666667	0.02	0	0.03	0.0166667	0.02	0	0	0.00666667
TraesCS6D02G370800	1.8	8.03	7.81	5.88	0	0	0	0	0	0.03	0	0.01	0	0.02	0.02	0.0133333	0.02	0	0	0.00666667
TraesCS3D02G538700	0.11	1.03	0.73	0.623333	0.02	0.07	1.96	0.683333	0	0	0.01	0.00333333	0	0.01	0.03	0.0133333	0.02	0	0	0.00666667
TraesCS7A02G132100	0	0	0	0	0	0.26	0	0.0866667	0	0	0	0	0	0.04	0	0.0133333	0	0.02	0	0.00666667
TraesCS5D02G286000	0.86	0.99	0.94	0.93	0.02	0	0	0.00666667	0	0	0	0	0.02	0	0.02	0.0133333	0	0	0.02	0.00666667
TraesCS6D02G355900	0	0	0.01	0.00333333	0.95	0.99	0	0.646667	0.64	0.17	0	0.27	0.02	0	0.01	0.01	0	0	0.02	0.00666667
TraesCS5D02G512800	0.05	0.04	0.02	0.0366667	0.07	0.01	0	0.0266667	0.08	0.02	0.01	0.0366667	0.02	0.01	0	0.01	0	0	0.02	0.00666667
TraesCS5D02G498100	0	0.06	0.05	0.0366667	0	0	0	0	0	0.04	0.12	0.0533333	0.02	0	0	0.00666667	0.02	0	0	0.00666667
TraesCS5D02G279600	0	0.02	0	0.00666667	0.02	0.13	0	0.05	0	0	0	0	0	0	0.02	0.00666667	0	0	0.02	0.00666667
TraesCS5D02G534500	0	0	0	0	0	0	0	0	0	0	0	0	0.02	0	0	0.00666667	0.02	0	0	0.00666667
TraesCS5D02G531700	2.39	2.33	2.34	2.35333	0.14	0.06	0	0.0666667	0	0	0	0	0.01	0	0	0.00333333	0	0.01	0.01	0.00666667
TraesCS1A02G014500	0	0	0	0	0	0	0	0	0	0	0	0	0	0.01	0	0.00333333	0.02	0	0	0.00666667
TraesCS5D02G488600	0	0.76	0.51	0.423333	0.03	0.03	0	0.02	0.03	0.34	2.19	0.853333	0	0	0	0	0	0.01	0.01	0.00666667
TraesCS5D02G525700	0	0	0.11	0.0366667	0.53	1.06	0	0.53	0.27	0.44	0.07	0.26	0	0	0	0	0	0	0.02	0.00666667
TraesCS5D02G495100	0.02	0	0	0.00666667	0	0	0.01	0.00333333	0	0.01	0.17	0.06	0	0	0	0	0	0	0.02	0.00666667
TraesCS5D02G563700	0.47	0.14	0.11	0.24	0.16	0.11	0	0.09	0	0	0	0	0	0	0	0	0	0	0.02	0.00666667
TraesCS6D02G366000	0	0.06	0.02	0.0266667	0	0.07	0	0.0233333	0	0	0	0	0	0	0	0	0.02	0	0	0.00666667
TraesCS5D02G549900	0	0	0	0	0.03	0	0	0.01	0	0	0	0	0	0	0	0	0	0	0.02	0.00666667
TraesCS5D02G555800	0	0	0	0	0	0	0	0	0	0	0	0	0	0	0	0	0.02	0	0	0.00666667
TraesCS6B02G054900	0	0	0	0	0	0	0	0	0	0	0	0	0	0	0	0	0	0.02	0	0.00666667
TraesCS6B02G057900	0	0	0	0	0	0	0	0	0	0	0	0	0	0	0	0	0.02	0	0	0.00666667
TraesCS6D02G347000	0	0	0	0	0	0	0	0	0	0	0	0	0	0	0	0	0	0	0.02	0.00666667
TraesCS6D02G383000	0	0	0	0	0	0	0	0	0	0	0	0	0	0	2.71	0.903333	0.01	0	0	0.00333333
TraesCS6B02G055100	0.03	0.02	0.01	0.02	0.13	0.07	0	0.0666667	0.06	0	0	0.02	0.65	0.19	0.24	0.36	0	0	0.01	0.00333333
TraesCS7D02G144800	0	0.01	0.02	0.01	0	0.03	0	0.01	0	0.01	0.22	0.0766667	0.02	0	0.98	0.333333	0.01	0	0	0.00333333
TraesCS3D02G533300	0	0	0	0	0.38	0.15	0	0.176667	0	0	0	0	0.44	0.46	0.03	0.31	0	0.01	0	0.00333333
TraesCS7A02G138800	0	0	0	0	0	0	0	0	0	0	0	0	0.03	0.79	0	0.273333	0	0.01	0	0.00333333
TraesCS7D02G141400	0.01	0	0	0.00333333	0	0	0	0	0	0	0	0	0	0.6	0	0.2	0	0	0.01	0.00333333
TraesCS3D02G536000	0	0.03	0.06	0.03	0	0	0.01	0.00333333	0	0	0.04	0.0133333	0.02	0.51	0.05	0.193333	0.01	0	0	0.00333333
TraesCS5D02G550800	0.73	1.51	1.74	1.32667	0.55	1.6	1.23	1.12667	0.61	1.95	1.48	1.34667	0	0.24	0.21	0.15	0	0.01	0	0.00333333
TraesCS5D02G508400	0.1	0.1	0.1	0.1	0.42	0.06	0	0.16	0	0.06	0	0.02	0.39	0.06	0	0.15	0	0.01	0	0.00333333
TraesCS6D02G368600	0	0	0	0	0	0	0	0	0	0	0	0	0	0.45	0	0.15	0.01	0	0	0.00333333
TraesCS5D02G532500	0.05	0.08	0.06	0.0633333	0.02	0.1	1.85	0.656667	0.74	2.73	3.99	2.48667	0	0	0.44	0.146667	0	0.01	0	0.00333333
TraesCS6D02G388200	0.13	0.03	0.07	0.0766667	0.1	0.1	0.05	0.0833333	0.13	0.09	0.02	0.08	0.24	0.13	0.01	0.126667	0.01	0	0	0.00333333
TraesCS6D02G383700	0.16	0.9	0.97	0.676667	0.29	0.01	0	0.1	0.87	0.76	0.28	0.636667	0.04	0.28	0	0.106667	0	0	0.01	0.00333333
TraesCS5D02G281800	0	0.06	0	0.02	0	0	0	0	0	0	0	0	0	0.32	0	0.106667	0	0.01	0	0.00333333
TraesCS5D02G528900	0.07	0.11	0.07	0.0833333	0.04	0.1	0	0.0466667	0.08	0.04	0	0.04	0.23	0	0	0.0766667	0	0.01	0	0.00333333
TraesCS7D02G143700	3.2	3.16	3.03	3.13	1.14	1.43	0.12	0.896667	0.46	0.23	0.2	0.296667	0.07	0	0.08	0.05	0	0.01	0	0.00333333
TraesCS5D02G487900	0	2.31	2.43	1.58	0.22	0.01	0	0.0766667	0	0.93	2.92	1.28333	0	0	0.11	0.0366667	0	0.01	0	0.00333333
TraesCS7D02G134200	0.14	0.04	0.03	0.07	0	0.01	0.04	0.0166667	0.01	0.01	0	0.00666667	0.06	0	0.04	0.0333333	0	0.01	0	0.00333333
TraesCS7D02G137900	0.02	0.01	0.01	0.0133333	0.01	0	0	0.00333333	0.02	0.02	0.05	0.03	0.02	0.04	0.02	0.0266667	0	0.01	0	0.00333333
TraesCS1D02G001700	0	0	0	0	0.02	0.01	0.24	0.09	0	0.34	2.37	0.903333	0	0.02	0.05	0.0233333	0.01	0	0	0.00333333
TraesCS5D02G559000	0	0	0.01	0.00333333	0	0	0	0	0	0.13	0	0.0433333	0	0.06	0.01	0.0233333	0	0	0.01	0.00333333
TraesCS5D02G525600	0.09	0.6	0.92	0.536667	2.89	2.39	0	1.76	0.61	0.29	0.02	0.306667	0.05	0	0	0.0166667	0	0.01	0	0.00333333
TraesCS6D02G396600	0.85	2.97	3.11	2.31	0.09	0.12	0.05	0.0866667	0.07	0.2	0.11	0.126667	0	0.01	0.03	0.0133333	0.01	0	0	0.00333333
TraesCS6D02G369600	0.11	1.22	1.23	0.853333	0.59	0.86	0.21	0.553333	0.01	0.07	0.23	0.103333	0.01	0.01	0.02	0.0133333	0.01	0	0	0.00333333
TraesCS6B02G051400	2.43	2.4	2.42	2.41667	0.01	0.02	0	0.01	0.04	0.02	0.06	0.04	0	0.02	0.02	0.0133333	0.01	0	0	0.00333333
TraesCS6D02G364000	0	0	0	0	0	0	0.02	0.00666667	0	0	0	0	0	0	0.04	0.0133333	0	0.01	0	0.00333333
TraesCS1A02G017600	0.18	0.35	0.42	0.316667	0.01	0	0	0.00333333	0	0	0	0	0	0.04	0	0.0133333	0	0	0.01	0.00333333
TraesCS1A02G034000	0.11	0.46	0.49	0.353333	0	0.03	0	0.01	0	0.02	0	0.00666667	0	0	0.03	0.01	0	0.01	0	0.00333333
TraesCS7D02G137300	0	0	0	0	0.02	0	0	0.00666667	0	0	0.37	0.123333	0	0	0.02	0.00666667	0	0.01	0	0.00333333
TraesCS5D02G285900	3.02	3.8	3.85	3.55667	1.01	0.79	0	0.6	0	0	0	0	0	0.02	0	0.00666667	0	0.01	0	0.00333333
TraesCS5A02G400500	1.84	4.58	4.23	3.55	0	0.1	0	0.0333333	0	0.02	0.49	0.17	0	0	0.01	0.00333333	0	0.01	0	0.00333333
TraesCS1A02G015000	0.03	0.28	0.13	0.146667	0.06	0.17	0.01	0.08	0	0.01	0	0.00333333	0.01	0	0	0.00333333	0.01	0	0	0.00333333
TraesCS5D02G480700	0.11	0.25	0.25	0.203333	0.01	0	0	0.00333333	0	0	0	0	0.01	0	0	0.00333333	0.01	0	0	0.00333333
TraesCS3D02G534600	0	0	0	0	0	0	0	0	0	1.63	3.16	1.59667	0	0	0	0	0.01	0	0	0.00333333
TraesCS5A02G396000	0	0	0	0	0	0	0	0	0	0	0.07	0.0233333	0	0	0	0	0	0	0.01	0.00333333
TraesCS5D02G551500	0	0	0	0	0	0	0.13	0.0433333	0	0	0	0	0	0	0	0	0	0.01	0	0.00333333
TraesCS5D02G515500	0.03	0.39	0.51	0.31	0.01	0	0	0.00333333	0	0	0	0	0	0	0	0	0	0.01	0	0.00333333
TraesCS1A02G020800	0.04	5.02	4.93	3.33	0	0	0	0	0	0	0	0	0	0	0	0	0	0.01	0	0.00333333
TraesCS5D02G535200	0	0	0	0	0	0	0	0	0	0	0	0	0	0	0	0	0	0.01	0	0.00333333
TraesCS5D02G493400	0	0	0	0	0	0	0	0	0.44	1.38	0.83	0.883333	0	2.56	4.53	2.36333	0	0	0	0
TraesCS5D02G474500	0	0	0.01	0.00333333	0	0	0	0	0	0	0	0	0.92	6.03	0	2.31667	0	0	0	0
TraesCS3D02G529000	0	0	0	0	0	0	0	0	0	0	0	0	0	0	4.98	1.66	0	0	0	0
TraesCS1D02G003500	0	0	0	0	0	0.15	0	0.05	0	0.02	0	0.00666667	2.45	2.28	0.05	1.59333	0	0	0	0
TraesCS7A02G131900	0	0	0	0	0	0	0	0	0	0	0	0	4.18	0	0	1.39333	0	0	0	0
TraesCS4A02G020700	0.76	1.59	2.36	1.57	1.9	1.61	2.26	1.92333	0.86	0.6	0.01	0.49	1.46	1.57	0.89	1.30667	0	0	0	0
TraesCS5D02G560800	0	0	0	0	0	0	0.1	0.0333333	0	0	0.12	0.04	0	0.37	3.54	1.30333	0	0	0	0
TraesCS1A02G018700	0	0	0	0	0	0.01	0.06	0.0233333	0	0	0	0	0.03	3.3	0.5	1.27667	0	0	0	0
TraesCS5D02G517400	0	0	0	0	0	0	0.04	0.0133333	0	0.04	0	0.0133333	0	0	3.53	1.17667	0	0	0	0
TraesCS5A02G404700	0.54	0	0.33	0.29	0	0	0	0	0	0	0	0	0	3.01	0.05	1.02	0	0	0	0
TraesCS7D02G143000	0	0	0	0	0	0	0	0	0	0	0	0	0	3.04	0	1.01333	0	0	0	0
[truncated: 577 more rows]
