# Supplementary material for: A genome-wide association study revealed the genetic variation and candidate genes for grain copper content in bread wheat (Triticum aestivum L.)
Source: Royal Society of Chemistry journal article supplement (doi:10.1039/d1fo04173h), 2022-01-01
Supplement: d1fo04173h6.xlsx [file d1fo04173h6.xlsx]

## Sheet: Table S6
Table S6 The collection of QTLs for grain Cu content in wheat
Article title	Chromosome	Closest marker	Left maker	Right maker
Investigation and genome-wide association study of grain copper content in Chinese common wheat	1D		brac169	cfd48
	6A		brac107	wms570
	6B		wPt-5188	tPt-2055
	7D		cfd66	barc135
A thorough screening based on QTLs controlling zinc and copper	1A	barc263
	1B	wmc222
	1B	wmc52
	1D	wmc153
	1D	cfd72
	2A	gwm636
	2A	gwm328
	2B	gwm388
	2B	gwm16
	2D	gwm157
	2D	cfd233
	2D	gwm320
	3A	barc310
	3A	gwm155
	3B	cfa2191
	3D	gwm52
	3D	barc42
	4A	gwm160
	4A	barc78
	4B	gwm495
	4B	gwm149
	4D	cfd106
	5A	barc122
	5A	barc135
	5A	wmc327
	5A	gwm595
	5A	wmc524
	5D	cfd189
	6B	gwm133
	6D	barc196
	7A	gwm60
	7B	barc258
	7B	barc182
	7D	gwm295
Genome-Wide Association Study Reveals Novel Genomic Regions Associated with 10 Grain Minerals in Synthetic Hexaploid Wheat	1B	S1B_544997339
	2A	S2A_738732586
	2A	S2A_742969119
	3B	S3B_689167760
	4B	S4B_37424735
	5A	S5A_643024354
	5B	S5B_607870649
	5B	S5B_607870649
	5D	S5D_493381192
	6A	S6A_613579920
	6B	S6B_27918199
	6B	S6B_6241996
Genetic dissection of zinc, iron, copper, manganese and phosphorus in wheat (Triticum aestivum L.) grain and rachis at two developmental stages	2B	Excalibur_c20050_133
	2B	Excalibur_c7963_1722
	2B	Kukri_c29640_92
	2B	Kukri_rep_c106290_204
	2B	wsnp_Ku_c12022_19520410
	2D	D_GDRF1KQ02JH49B_255
	2D	Ra_c2033_337
	2D	Ex_c54373_394
	2D	Ku_c57043_1232
	5B	BS00073015_51
	5B	Tdurum_contig44635_759
	5B	RAC875_c103988_92
	5B	RAC875_c985_387
	5B	wsnp_Ex_c2582_4804223
	2D	GENE-0687_448
	2D	wsnp_Ex_c25311_34578436
	2D	Kukri_c26676_225
	3B	wsnp_Ex_c8360_14085858
	3B	Ra_c17608_960
	5B	BS00073015_51
	5B	Tdurum_contig44635_759
	5B	RAC875_c103988_92
	5B	RAC875_c985_387
	5B	wsnp_Ex_c2582_4804223
	7B	BS00027054_51
	7B	BS00064146_51
	7B	Excalibur_rep_c74234_183
	7B	Tdurum_contig28304_335
	7B	wsnp_BE605194B_Ta_2_1
	7B	wsnp_BE605194B_Ta_2_7
Quantitative trait loci conferring grain mineral nutrient concentrations in durum wheat 3 wild emmer wheat RIL population	1A	DuPw038
	2A	wPt-8115
	3B	gwm853
	4A	wmc262
	4B	gwm3072
	5A	gwm154
	6A	gwm1150
	6B	gwm1076
	7A	wPt-7053
	7B	gwm46
Characterization of Quantitative Trait Loci for Grain Minerals in Hexaploid	2A		Xgwm71.1	Xgwm95
	4A		P8222.2	P5611.1
	4D		Xgwm192	WMC331
	5A		WMC410	WMC74
	6A		WMC297	Xgdm36
	7B		WMC269.4	P3446.7
